# Supplementary material for: Genome-Wide Characterization of Trehalose-6-Phosphate Synthase Gene Family of Brassica napus and Potential Links with Agronomic Traits
Source: MDPI journal article supplement (doi:10.3390/ijms232415714), 2022-12-11
Supplement: s1 [file s1]

```

1 AtTPS1      MPGNKYNCSSSHIPLSRTERLLRDRELREKRKSNRARNPNPDVAGSSSENSENDLRLEGDSS
2 BnTPS3      -----
3 BnTPS16     MPGDKYNSSSSHIPLSRTERLLRERELREKRKSNRARNPNNEAVGSSSENSDNDLRLEGDSS
4 BnTPS10     MPGNKYNLSSSHIPLSRTERLLRERELREKRKSNRALNPNDNP---DNSENDLRLEGDSS
5 BnTPS20     MPGNKYNLSSSHIPLSRTERLLRERELRDKRRSNRALNPNDNP---DNSENDLRLEGDSS
6
7 AtTPS1      RQ-YVEQYLEGAAAAAHDDACERQEVFPYNRQRLLVVANRLPVSAVRRGEDSWSLEISA
8 BnTPS3      -----
9 BnTPS16     RQ-YVEQYLEGASAAAHNDVCERQEVFPYNRQRLLVVANRLPVSAVRRGEDSWSLEISA
10 BnTPS10     RQQYVEQYLEGAAAAAHDDVCERQEVFPYNRQRLLVVANRLPVSAVRRGEDSWSLEISA
11 BnTPS20     RQQYVEQYLEGAAAAAHDDVCERQEVFPYNRQRLLVVANRLPVSAVRRGEDSWSLEISA
12
13 AtTPS1      GGLVSALLGVKEFEARWIGWAGVNPDEVGQKALSKALAEKRCIPVFLDEEIVHQYYNGY
14 BnTPS3      -----MDWM--AGVNPDEVGQKSLTKALAEKRCIPVFLDEEIVHQYYNGY
15 BnTPS16     GGLVSALLGVKEFEARWIGWAGVNPDEVGQKALTKALAEKRCIPVFLDEEIVHQYYNGY
16 BnTPS10     GGLVSALLGVKEFEARWIGWAGVNPDEVGQKALTKALAEKRCIPVFLDEEIVHQYYNGY
17 BnTPS20     GGLVSALLGVKEFEARWIGWAGVNPDEVGQKALTKALAEKRCIPVFLDEEIVHQYYNGY

```

Supplemental Figure S1. Multiple sequence alignment of *TPS1* gene.
