# Supplementary material for: Genome-Wide Characterization of Trehalose-6-Phosphate Synthase Gene Family of Brassica napus and Potential Links with Agronomic Traits
Source: Int J Mol Sci. 2022 Dec 11;23(24):15714. doi: 10.3390/ijms232415714 (PMC9779256; doi:10.3390/ijms232415714)
Supplement: Supplementary file 1 [file ijms-23-15714-s001.zip › Supplementary Tables-final.xlsx]

## Sheet: Table S1
Table S1. Characteristics of the BnTPS genes.
Gene ID	Alias Name	Homologous Gene	Chromosome	Number of Amino Acid	Molecular Weight	Theoretical point	Instability Index	Exon number	Duplication type	Subcellular Location
BnaA01g22200D	BnTPS1	AtTPS10	chrA01	857	96977	6.04	47.2	3	WGD or segmental	Cytoplasm
BnaA02g14790D	BnTPS2	AtTPS8	chrA02	814	92311.6	5.96	45.48	3	WGD or segmental	Cytoplasm
BnaA02g18920D	BnTPS3	AtTPS1	chrA02	774	87348.4	6.63	43.31	15	WGD or segmental	Cytoplasm
BnaA03g43320D	BnTPS4	AtTPS5	chrA03	857	96763.8	5.92	40.67	3	WGD or segmental	Cytoplasm
BnaA03g48650D	BnTPS5	AtTPS4	chrA03	786	88605.1	6.11	35.98	17	WGD or segmental	Cytoplasm
BnaA03g54540D	BnTPS6	AtTPS10	chrA03	890	100514	5.69	46.06	3	Dispersed	Cytoplasm
BnaA06g11450D	BnTPS7	AtTPS2	chrA06	822	93247.4	5.83	29.94	17	WGD or segmental	Cytoplasm
BnaA06g11460D	BnTPS8	AtTPS2	chrA06	811	91998.7	5.77	33.59	18	Tandem	Cytoplasm
BnaA07g24830D	BnTPS9	AtTPS6	chrA07	852	97001.4	5.94	47.53	4	WGD or segmental	Cytoplasm
BnaA07g34230D	BnTPS10	AtTPS1	chrA07	950	106937	6.63	50.78	15	WGD or segmental	Cytoplasm
BnaA08g20280D	BnTPS11	AtTPS9	chrA08	868	98512.6	5.83	47.06	3	WGD or segmental	Cytoplasm
BnaA08g28610D	BnTPS12	AtTPS7	chrA08	852	96983.9	5.54	43.7	3	WGD or segmental	Cytoplasm
BnaA09g09720D	BnTPS13	AtTPS11	chrA09	864	97843.6	6.16	43.74	3	WGD or segmental	Cytoplasm
BnaC01g43070D	BnTPS14	AtTPS10	chrC01_random	857	96910.1	6.01	45.32	3	WGD or segmental	Cytoplasm
BnaC02g19750D	BnTPS15	AtTPS8	chrC02	814	92266.6	6.02	46.31	3	WGD or segmental	Cytoplasm
BnaC02g25020D	BnTPS16	AtTPS1	chrC02	932	104805	6.74	48	16	WGD or segmental	Cytoplasm
BnaC05g13090D	BnTPS17	AtTPS2	chrC05	819	92900.9	5.83	30.08	17	WGD or segmental	Cytoplasm
BnaC05g13110D	BnTPS18	AtTPS3	chrC05	813	92224.3	5.96	35.93	17	Proximal	Cytoplasm
BnaC06g26160D	BnTPS19	AtTPS6	chrC06	851	96949.3	5.94	47.5	4	WGD or segmental	Cytoplasm
BnaC06g39000D	BnTPS20	AtTPS1	chrC06	951	107079	6.63	50.79	15	WGD or segmental	Cytoplasm
BnaC07g34770D	BnTPS21	AtTPS5	chrC07	837	94797.6	5.98	41.02	4	WGD or segmental	Cytoplasm
BnaC07g50330D	BnTPS22	AtTPS4	chrC07_random	786	88750.4	6.45	36.88	17	WGD or segmental	Cytoplasm
BnaC08g01800D	BnTPS23	AtTPS7	chrC08	852	97039.9	5.5	43.96	3	WGD or segmental	Cytoplasm
BnaC08g06450D	BnTPS24	AtTPS9	chrC08	861	98005.9	6.01	46.07	4	WGD or segmental	Cytoplasm
BnaC09g51060D	BnTPS25	AtTPS11	chrC09_random	864	97760.6	6.22	43.72	3	WGD or segmental	Cytoplasm
BnaCnng41250D	BnTPS26	AtTPS10	chrCnn_random	860	97164.2	6.09	46.02	3	Dispersed	Cytoplasm

## Sheet: Table S2
Table S2. Ka/Ks analysis for paralogous gene pairs of BnTPS genes.
Gene1 ID	Gene2 ID	Ka value	Ks value	Ka/Ks value
BnTPS1	BnTPS14	0.0122525	0.102278	0.119795
BnTPS3	BnTPS10	0.0241031	0.383738	0.0628113
BnTPS2	BnTPS11	0.0906444	1.24242	0.0729578
BnTPS2	BnTPS15	0.00318401	0.1045	0.0304691
BnTPS3	BnTPS16	0.0211392	0.0636322	0.33221
BnTPS3	BnTPS20	0.0240962	0.409402	0.058857
BnTPS2	BnTPS24	0.0982646	1.16483	0.0843599
BnTPS4	BnTPS21	0.00834211	0.149645	0.055746
BnTPS5	BnTPS22	0.00967577	0.0410931	0.23546
BnTPS7	BnTPS10	0.194766	0.97359	0.200049
BnTPS7	BnTPS17	0.0138351	0.0459985	0.300773
BnTPS10	BnTPS16	0.0249884	0.375869	0.0664816
BnTPS10	BnTPS17	0.19306	0.992853	0.19445
BnTPS10	BnTPS20	0.00229419	0.148694	0.0154289
BnTPS9	BnTPS19	0.00534444	0.142613	0.0374752
BnTPS11	BnTPS15	0.0902338	1.19896	0.0752603
BnTPS12	BnTPS23	0.00193048	0.176226	0.0109546
BnTPS11	BnTPS24	0.0124924	0.183468	0.0680903
BnTPS13	BnTPS25	0.00348115	0.0921686	0.0377694
BnTPS16	BnTPS20	0.0229235	0.404974	0.0566049

## Sheet: Table S3
Table S3. The position of Cis-acting regulatory elements of BnTPS.
Gene ID	Chr	Start	Sequence	Cis-acting regulatory element	Function
BnTPS2	chrA02	1402	AACGAC	TGA-element	auxin-responsive element
BnTPS2	chrA02	1597	AACGAC	TGA-element	auxin-responsive element
BnTPS2	chrA02	1740	AACGAC	TGA-element	auxin-responsive element
BnTPS2	chrA02	1886	AACGAC	TGA-element	auxin-responsive element
BnTPS3	chrA02	829	AACGAC	TGA-element	auxin-responsive element
BnTPS3	chrA02	1060	AACGAC	TGA-element	auxin-responsive element
BnTPS3	chrA02	1480	AACGAC	TGA-element	auxin-responsive element
BnTPS7	chrA06	1975	AACGAC	TGA-element	auxin-responsive element
BnTPS10	chrA07	1565	AACGAC	TGA-element	auxin-responsive element
BnTPS15	chrC02	1394	AACGAC	TGA-element	auxin-responsive element
BnTPS15	chrC02	1591	AACGAC	TGA-element	auxin-responsive element
BnTPS15	chrC02	1888	AACGAC	TGA-element	auxin-responsive element
BnTPS16	chrC02	1256	AACGAC	TGA-element	auxin-responsive element
BnTPS16	chrC02	1755	AACGAC	TGA-element	auxin-responsive element
BnTPS17	chrC05	568	AACGAC	TGA-element	auxin-responsive element
BnTPS17	chrC05	1975	AACGAC	TGA-element	auxin-responsive element
BnTPS20	chrC06	1559	AACGAC	TGA-element	auxin-responsive element
BnTPS22	chrC07_random	161	AACGAC	TGA-element	auxin-responsive element
BnTPS4	chrA03	1718	ATAGAAATCAA	AT-rich element	binding site of AT-rich DNA binding protein (ATBP-1)
BnTPS4	chrA03	1847	ATAGAAATCAA	AT-rich element	binding site of AT-rich DNA binding protein (ATBP-1)
BnTPS5	chrA03	1752	ATAGAAATCAA	AT-rich element	binding site of AT-rich DNA binding protein (ATBP-1)
BnTPS7	chrA06	187	ATAGAAATCAA	AT-rich element	binding site of AT-rich DNA binding protein (ATBP-1)
BnTPS7	chrA06	1871	ATAGAAATCAA	AT-rich element	binding site of AT-rich DNA binding protein (ATBP-1)
BnTPS6	chrA03	1391	(T/C)C(T/C)AACGG(T/C)(T/C)A	MSA-like	cis-acting element involved in cell cycle regulation
BnTPS9	chrA07	1458	(T/C)C(T/C)AACGG(T/C)(T/C)A	MSA-like	cis-acting element involved in cell cycle regulation
BnTPS19	chrC06	1441	(T/C)C(T/C)AACGG(T/C)(T/C)A	MSA-like	cis-acting element involved in cell cycle regulation
BnTPS2	chrA02	1169	GTTTTCTTAC	TC-rich repeats	cis-acting element involved in defense and stress responsiveness
BnTPS3	chrA02	1106	GTTTTCTTAC	TC-rich repeats	cis-acting element involved in defense and stress responsiveness
BnTPS5	chrA03	1524	GTTTTCTTAC	TC-rich repeats	cis-acting element involved in defense and stress responsiveness
BnTPS7	chrA06	1611	GTTTTCTTAC	TC-rich repeats	cis-acting element involved in defense and stress responsiveness
BnTPS7	chrA06	1756	ATTCTCTAAC	TC-rich repeats	cis-acting element involved in defense and stress responsiveness
BnTPS8	chrA06	305	GTTTTCTTAC	TC-rich repeats	cis-acting element involved in defense and stress responsiveness
BnTPS8	chrA06	325	GTTTTCTTAC	TC-rich repeats	cis-acting element involved in defense and stress responsiveness
BnTPS9	chrA07	911	ATTCTCTAAC	TC-rich repeats	cis-acting element involved in defense and stress responsiveness
BnTPS9	chrA07	1621	GTTTTCTTAC	TC-rich repeats	cis-acting element involved in defense and stress responsiveness
BnTPS11	chrA08	522	ATTCTCTAAC	TC-rich repeats	cis-acting element involved in defense and stress responsiveness
BnTPS11	chrA08	911	GTTTTCTTAC	TC-rich repeats	cis-acting element involved in defense and stress responsiveness
BnTPS11	chrA08	1369	GTTTTCTTAC	TC-rich repeats	cis-acting element involved in defense and stress responsiveness
BnTPS12	chrA08	1311	ATTCTCTAAC	TC-rich repeats	cis-acting element involved in defense and stress responsiveness
BnTPS13	chrA09	566	GTTTTCTTAC	TC-rich repeats	cis-acting element involved in defense and stress responsiveness
BnTPS15	chrC02	1162	GTTTTCTTAC	TC-rich repeats	cis-acting element involved in defense and stress responsiveness
BnTPS16	chrC02	1795	GTTTTCTTAC	TC-rich repeats	cis-acting element involved in defense and stress responsiveness
BnTPS17	chrC05	1069	ATTCTCTAAC	TC-rich repeats	cis-acting element involved in defense and stress responsiveness
BnTPS17	chrC05	1627	GTTTTCTTAC	TC-rich repeats	cis-acting element involved in defense and stress responsiveness
BnTPS17	chrC05	1772	ATTCTCTAAC	TC-rich repeats	cis-acting element involved in defense and stress responsiveness
BnTPS17	chrC05	1805	GTTTTCTTAC	TC-rich repeats	cis-acting element involved in defense and stress responsiveness
BnTPS19	chrC06	1606	GTTTTCTTAC	TC-rich repeats	cis-acting element involved in defense and stress responsiveness
BnTPS22	chrC07_random	1524	GTTTTCTTAC	TC-rich repeats	cis-acting element involved in defense and stress responsiveness
BnTPS24	chrC08	1327	GTTTTCTTAC	TC-rich repeats	cis-acting element involved in defense and stress responsiveness
BnTPS1	chrA01	1152	TATCCCA	TATC-box	cis-acting element involved in gibberellin-responsiveness
BnTPS2	chrA02	787	TATCCCA	TATC-box	cis-acting element involved in gibberellin-responsiveness
BnTPS6	chrA03	1308	TATCCCA	TATC-box	cis-acting element involved in gibberellin-responsiveness
BnTPS7	chrA06	1404	TATCCCA	TATC-box	cis-acting element involved in gibberellin-responsiveness
BnTPS13	chrA09	1118	TATCCCA	TATC-box	cis-acting element involved in gibberellin-responsiveness
BnTPS13	chrA09	1623	TATCCCA	TATC-box	cis-acting element involved in gibberellin-responsiveness
BnTPS15	chrC02	785	TATCCCA	TATC-box	cis-acting element involved in gibberellin-responsiveness
BnTPS15	chrC02	2006	TATCCCA	TATC-box	cis-acting element involved in gibberellin-responsiveness
BnTPS17	chrC05	1420	TATCCCA	TATC-box	cis-acting element involved in gibberellin-responsiveness
BnTPS22	chrC07_random	276	TATCCCA	TATC-box	cis-acting element involved in gibberellin-responsiveness
BnTPS24	chrC08	618	TATCCCA	TATC-box	cis-acting element involved in gibberellin-responsiveness
BnTPS25	chrC09_random	139	TATCCCA	TATC-box	cis-acting element involved in gibberellin-responsiveness
BnTPS25	chrC09_random	1622	TATCCCA	TATC-box	cis-acting element involved in gibberellin-responsiveness
BnTPS4	chrA03	885	CTAACGTATT	ACE	cis-acting element involved in light responsiveness
BnTPS5	chrA03	1613	CTAACGTATT	ACE	cis-acting element involved in light responsiveness
BnTPS5	chrA03	1701	CTAACGTATT	ACE	cis-acting element involved in light responsiveness
BnTPS5	chrA03	1818	GACACGTATG	ACE	cis-acting element involved in light responsiveness
BnTPS7	chrA06	802	GACACGTATG	ACE	cis-acting element involved in light responsiveness
BnTPS7	chrA06	1390	GACACGTATG	ACE	cis-acting element involved in light responsiveness
BnTPS7	chrA06	1535	GACACGTATG	ACE	cis-acting element involved in light responsiveness
BnTPS17	chrC05	822	GACACGTATG	ACE	cis-acting element involved in light responsiveness
BnTPS17	chrC05	1406	GACACGTATG	ACE	cis-acting element involved in light responsiveness
BnTPS17	chrC05	1551	GACACGTATG	ACE	cis-acting element involved in light responsiveness
BnTPS22	chrC07_random	1613	CTAACGTATT	ACE	cis-acting element involved in light responsiveness
BnTPS22	chrC07_random	1818	GACACGTATG	ACE	cis-acting element involved in light responsiveness
BnTPS23	chrC08	282	CTAACGTATT	ACE	cis-acting element involved in light responsiveness
BnTPS1	chrA01	920	CCGAAA	LTR	cis-acting element involved in low-temperature responsiveness
BnTPS2	chrA02	1297	CCGAAA	LTR	cis-acting element involved in low-temperature responsiveness
BnTPS5	chrA03	1128	CCGAAA	LTR	cis-acting element involved in low-temperature responsiveness
BnTPS11	chrA08	1224	CCGAAA	LTR	cis-acting element involved in low-temperature responsiveness
BnTPS13	chrA09	1855	CCGAAA	LTR	cis-acting element involved in low-temperature responsiveness
BnTPS14	chrC01_random	1359	CCGAAA	LTR	cis-acting element involved in low-temperature responsiveness
BnTPS14	chrC01_random	1462	CCGAAA	LTR	cis-acting element involved in low-temperature responsiveness
BnTPS15	chrC02	1290	CCGAAA	LTR	cis-acting element involved in low-temperature responsiveness
BnTPS24	chrC08	859	CCGAAA	LTR	cis-acting element involved in low-temperature responsiveness
BnTPS25	chrC09_random	1855	CCGAAA	LTR	cis-acting element involved in low-temperature responsiveness
BnTPS1	chrA01	361	CCATCTTTTT	TCA-element	cis-acting element involved in salicylic acid responsiveness
BnTPS3	chrA02	1649	TCAGAAGAGG	TCA-element	cis-acting element involved in salicylic acid responsiveness
BnTPS4	chrA03	1239	TCAGAAGAGG	TCA-element	cis-acting element involved in salicylic acid responsiveness
BnTPS4	chrA03	1579	CCATCTTTTT	TCA-element	cis-acting element involved in salicylic acid responsiveness
BnTPS4	chrA03	1644	CCATCTTTTT	TCA-element	cis-acting element involved in salicylic acid responsiveness
BnTPS5	chrA03	828	CCATCTTTTT	TCA-element	cis-acting element involved in salicylic acid responsiveness
BnTPS5	chrA03	1962	CCATCTTTTT	TCA-element	cis-acting element involved in salicylic acid responsiveness
BnTPS10	chrA07	1518	CCATCTTTTT	TCA-element	cis-acting element involved in salicylic acid responsiveness
BnTPS11	chrA08	1552	CCATCTTTTT	TCA-element	cis-acting element involved in salicylic acid responsiveness
BnTPS12	chrA08	286	CCATCTTTTT	TCA-element	cis-acting element involved in salicylic acid responsiveness
BnTPS17	chrC05	317	TCAGAAGAGG	TCA-element	cis-acting element involved in salicylic acid responsiveness
BnTPS21	chrC07	1298	TCAGAAGAGG	TCA-element	cis-acting element involved in salicylic acid responsiveness
BnTPS22	chrC07_random	1962	CCATCTTTTT	TCA-element	cis-acting element involved in salicylic acid responsiveness
BnTPS23	chrC08	500	CCATCTTTTT	TCA-element	cis-acting element involved in salicylic acid responsiveness
BnTPS24	chrC08	592	CCATCTTTTT	TCA-element	cis-acting element involved in salicylic acid responsiveness
BnTPS24	chrC08	1510	CCATCTTTTT	TCA-element	cis-acting element involved in salicylic acid responsiveness
BnTPS1	chrA01	804	TACGGTC	ABRE	cis-acting element involved in the abscisic acid responsiveness
BnTPS1	chrA01	1084	TACGGTC	ABRE	cis-acting element involved in the abscisic acid responsiveness
BnTPS1	chrA01	1425	ACGTG	ABRE	cis-acting element involved in the abscisic acid responsiveness
BnTPS1	chrA01	1793	CACGTG	ABRE	cis-acting element involved in the abscisic acid responsiveness
BnTPS1	chrA01	1794	ACGTG	ABRE	cis-acting element involved in the abscisic acid responsiveness
BnTPS2	chrA02	111	ACGTG	ABRE	cis-acting element involved in the abscisic acid responsiveness
BnTPS2	chrA02	210	ACGTG	ABRE	cis-acting element involved in the abscisic acid responsiveness
BnTPS2	chrA02	1177	ACGTG	ABRE	cis-acting element involved in the abscisic acid responsiveness
BnTPS5	chrA03	337	ACGTG	ABRE	cis-acting element involved in the abscisic acid responsiveness
BnTPS5	chrA03	795	ACGTG	ABRE	cis-acting element involved in the abscisic acid responsiveness
BnTPS5	chrA03	1665	ACGTG	ABRE	cis-acting element involved in the abscisic acid responsiveness
BnTPS5	chrA03	1820	TACGTGTC	ABRE	cis-acting element involved in the abscisic acid responsiveness
BnTPS5	chrA03	1821	ACGTG	ABRE	cis-acting element involved in the abscisic acid responsiveness
BnTPS5	chrA03	1863	ACGTG	ABRE	cis-acting element involved in the abscisic acid responsiveness
BnTPS7	chrA06	586	ACGTG	ABRE	cis-acting element involved in the abscisic acid responsiveness
BnTPS7	chrA06	741	ACGTG	ABRE	cis-acting element involved in the abscisic acid responsiveness
BnTPS7	chrA06	1390	TACGTGTC	ABRE	cis-acting element involved in the abscisic acid responsiveness
BnTPS7	chrA06	1392	ACGTG	ABRE	cis-acting element involved in the abscisic acid responsiveness
BnTPS9	chrA07	1217	ACGTG	ABRE	cis-acting element involved in the abscisic acid responsiveness
BnTPS9	chrA07	1262	CACGTG	ABRE	cis-acting element involved in the abscisic acid responsiveness
BnTPS9	chrA07	1263	ACGTG	ABRE	cis-acting element involved in the abscisic acid responsiveness
BnTPS9	chrA07	1419	ACGTG	ABRE	cis-acting element involved in the abscisic acid responsiveness
BnTPS9	chrA07	1788	ACGTG	ABRE	cis-acting element involved in the abscisic acid responsiveness
BnTPS11	chrA08	1377	ACGTG	ABRE	cis-acting element involved in the abscisic acid responsiveness
BnTPS11	chrA08	1606	ACGTG	ABRE	cis-acting element involved in the abscisic acid responsiveness
BnTPS12	chrA08	91	GACACGTACGT	ABRE	cis-acting element involved in the abscisic acid responsiveness
BnTPS12	chrA08	93	ACGTG	ABRE	cis-acting element involved in the abscisic acid responsiveness
BnTPS13	chrA09	108	GACACGTGGC	ABRE	cis-acting element involved in the abscisic acid responsiveness
BnTPS13	chrA09	110	CACGTG	ABRE	cis-acting element involved in the abscisic acid responsiveness
BnTPS13	chrA09	111	ACGTG	ABRE	cis-acting element involved in the abscisic acid responsiveness
BnTPS13	chrA09	504	ACGTG	ABRE	cis-acting element involved in the abscisic acid responsiveness
BnTPS13	chrA09	556	ACGTG	ABRE	cis-acting element involved in the abscisic acid responsiveness
BnTPS13	chrA09	629	GACACGTGGC	ABRE	cis-acting element involved in the abscisic acid responsiveness
BnTPS13	chrA09	631	ACGTG	ABRE	cis-acting element involved in the abscisic acid responsiveness
BnTPS13	chrA09	653	CACGTG	ABRE	cis-acting element involved in the abscisic acid responsiveness
BnTPS13	chrA09	654	ACGTG	ABRE	cis-acting element involved in the abscisic acid responsiveness
BnTPS13	chrA09	1560	ACGTG	ABRE	cis-acting element involved in the abscisic acid responsiveness
BnTPS14	chrC01_random	182	ACGTG	ABRE	cis-acting element involved in the abscisic acid responsiveness
BnTPS14	chrC01_random	1441	ACGTG	ABRE	cis-acting element involved in the abscisic acid responsiveness
BnTPS14	chrC01_random	1838	CACGTG	ABRE	cis-acting element involved in the abscisic acid responsiveness
BnTPS14	chrC01_random	1839	ACGTG	ABRE	cis-acting element involved in the abscisic acid responsiveness
BnTPS15	chrC02	109	ACGTG	ABRE	cis-acting element involved in the abscisic acid responsiveness
BnTPS15	chrC02	207	ACGTG	ABRE	cis-acting element involved in the abscisic acid responsiveness
BnTPS15	chrC02	1170	ACGTG	ABRE	cis-acting element involved in the abscisic acid responsiveness
BnTPS16	chrC02	728	AACCCGG	ABRE	cis-acting element involved in the abscisic acid responsiveness
BnTPS16	chrC02	1648	ACGTG	ABRE	cis-acting element involved in the abscisic acid responsiveness
BnTPS16	chrC02	1681	TACGGTC	ABRE	cis-acting element involved in the abscisic acid responsiveness
BnTPS17	chrC05	732	GCAACGTGTC	ABRE	cis-acting element involved in the abscisic acid responsiveness
BnTPS17	chrC05	734	CACGTG	ABRE	cis-acting element involved in the abscisic acid responsiveness
BnTPS17	chrC05	735	ACGTG	ABRE	cis-acting element involved in the abscisic acid responsiveness
BnTPS17	chrC05	1028	CACGTG	ABRE	cis-acting element involved in the abscisic acid responsiveness
BnTPS17	chrC05	1029	ACGTG	ABRE	cis-acting element involved in the abscisic acid responsiveness
BnTPS17	chrC05	1408	ACGTG	ABRE	cis-acting element involved in the abscisic acid responsiveness
BnTPS19	chrC06	1206	ACGTG	ABRE	cis-acting element involved in the abscisic acid responsiveness
BnTPS19	chrC06	1251	CACGTG	ABRE	cis-acting element involved in the abscisic acid responsiveness
BnTPS19	chrC06	1252	ACGTG	ABRE	cis-acting element involved in the abscisic acid responsiveness
BnTPS19	chrC06	1402	ACGTG	ABRE	cis-acting element involved in the abscisic acid responsiveness
BnTPS19	chrC06	1771	ACGTG	ABRE	cis-acting element involved in the abscisic acid responsiveness
BnTPS22	chrC07_random	493	GCAACGTGTC	ABRE	cis-acting element involved in the abscisic acid responsiveness
BnTPS22	chrC07_random	495	CACGTG	ABRE	cis-acting element involved in the abscisic acid responsiveness
BnTPS22	chrC07_random	496	ACGTG	ABRE	cis-acting element involved in the abscisic acid responsiveness
BnTPS22	chrC07_random	1665	ACGTG	ABRE	cis-acting element involved in the abscisic acid responsiveness
BnTPS22	chrC07_random	1820	TACGTGTC	ABRE	cis-acting element involved in the abscisic acid responsiveness
BnTPS22	chrC07_random	1821	ACGTG	ABRE	cis-acting element involved in the abscisic acid responsiveness
BnTPS22	chrC07_random	1863	ACGTG	ABRE	cis-acting element involved in the abscisic acid responsiveness
BnTPS23	chrC08	263	ACGTG	ABRE	cis-acting element involved in the abscisic acid responsiveness
BnTPS24	chrC08	1335	ACGTG	ABRE	cis-acting element involved in the abscisic acid responsiveness
BnTPS24	chrC08	1577	ACGTG	ABRE	cis-acting element involved in the abscisic acid responsiveness
BnTPS24	chrC08	1899	ACGTG	ABRE	cis-acting element involved in the abscisic acid responsiveness
BnTPS25	chrC09_random	575	AACCCGG	ABRE	cis-acting element involved in the abscisic acid responsiveness
BnTPS25	chrC09_random	1153	CACGTG	ABRE	cis-acting element involved in the abscisic acid responsiveness
BnTPS25	chrC09_random	1154	ACGTG	ABRE	cis-acting element involved in the abscisic acid responsiveness
BnTPS25	chrC09_random	1559	ACGTG	ABRE	cis-acting element involved in the abscisic acid responsiveness
BnTPS6	chrA03	945	CCGTCC	A-box	cis-acting regulatory element
BnTPS6	chrA03	954	CCGTCC	A-box	cis-acting regulatory element
BnTPS9	chrA07	1707	CCGTCC	A-box	cis-acting regulatory element
BnTPS12	chrA08	325	CCGTCC	A-box	cis-acting regulatory element
BnTPS13	chrA09	1796	CCGTCC	A-box	cis-acting regulatory element
BnTPS14	chrC01_random	1176	CCGTCC	A-box	cis-acting regulatory element
BnTPS19	chrC06	1691	CCGTCC	A-box	cis-acting regulatory element
BnTPS25	chrC09_random	600	CCGTCC	A-box	cis-acting regulatory element
BnTPS25	chrC09_random	1797	CCGTCC	A-box	cis-acting regulatory element
BnTPS1	chrA01	476	AAACCA	ARE	cis-acting regulatory element essential for the anaerobic induction
BnTPS1	chrA01	636	AAACCA	ARE	cis-acting regulatory element essential for the anaerobic induction
BnTPS1	chrA01	1679	AAACCA	ARE	cis-acting regulatory element essential for the anaerobic induction
BnTPS2	chrA02	634	AAACCA	ARE	cis-acting regulatory element essential for the anaerobic induction
BnTPS3	chrA02	1248	AAACCA	ARE	cis-acting regulatory element essential for the anaerobic induction
BnTPS3	chrA02	1978	AAACCA	ARE	cis-acting regulatory element essential for the anaerobic induction
BnTPS4	chrA03	1719	AAACCA	ARE	cis-acting regulatory element essential for the anaerobic induction
BnTPS5	chrA03	506	AAACCA	ARE	cis-acting regulatory element essential for the anaerobic induction
BnTPS5	chrA03	615	AAACCA	ARE	cis-acting regulatory element essential for the anaerobic induction
BnTPS5	chrA03	1436	AAACCA	ARE	cis-acting regulatory element essential for the anaerobic induction
BnTPS6	chrA03	320	AAACCA	ARE	cis-acting regulatory element essential for the anaerobic induction
BnTPS7	chrA06	332	AAACCA	ARE	cis-acting regulatory element essential for the anaerobic induction
BnTPS7	chrA06	996	AAACCA	ARE	cis-acting regulatory element essential for the anaerobic induction
BnTPS8	chrA06	1945	AAACCA	ARE	cis-acting regulatory element essential for the anaerobic induction
BnTPS9	chrA07	1938	AAACCA	ARE	cis-acting regulatory element essential for the anaerobic induction
BnTPS10	chrA07	901	AAACCA	ARE	cis-acting regulatory element essential for the anaerobic induction
BnTPS10	chrA07	1931	AAACCA	ARE	cis-acting regulatory element essential for the anaerobic induction
BnTPS11	chrA08	124	AAACCA	ARE	cis-acting regulatory element essential for the anaerobic induction
BnTPS12	chrA08	1181	AAACCA	ARE	cis-acting regulatory element essential for the anaerobic induction
BnTPS13	chrA09	657	AAACCA	ARE	cis-acting regulatory element essential for the anaerobic induction
BnTPS14	chrC01_random	703	AAACCA	ARE	cis-acting regulatory element essential for the anaerobic induction
BnTPS14	chrC01_random	1724	AAACCA	ARE	cis-acting regulatory element essential for the anaerobic induction
BnTPS15	chrC02	632	AAACCA	ARE	cis-acting regulatory element essential for the anaerobic induction
BnTPS16	chrC02	717	AAACCA	ARE	cis-acting regulatory element essential for the anaerobic induction
BnTPS17	chrC05	92	AAACCA	ARE	cis-acting regulatory element essential for the anaerobic induction
BnTPS17	chrC05	561	AAACCA	ARE	cis-acting regulatory element essential for the anaerobic induction
BnTPS17	chrC05	696	AAACCA	ARE	cis-acting regulatory element essential for the anaerobic induction
BnTPS17	chrC05	1010	AAACCA	ARE	cis-acting regulatory element essential for the anaerobic induction
BnTPS18	chrC05	1945	AAACCA	ARE	cis-acting regulatory element essential for the anaerobic induction
BnTPS20	chrC06	350	AAACCA	ARE	cis-acting regulatory element essential for the anaerobic induction
BnTPS20	chrC06	1931	AAACCA	ARE	cis-acting regulatory element essential for the anaerobic induction
BnTPS21	chrC07	431	AAACCA	ARE	cis-acting regulatory element essential for the anaerobic induction
BnTPS22	chrC07_random	107	AAACCA	ARE	cis-acting regulatory element essential for the anaerobic induction
BnTPS22	chrC07_random	760	AAACCA	ARE	cis-acting regulatory element essential for the anaerobic induction
BnTPS22	chrC07_random	964	AAACCA	ARE	cis-acting regulatory element essential for the anaerobic induction
BnTPS23	chrC08	1157	AAACCA	ARE	cis-acting regulatory element essential for the anaerobic induction
BnTPS24	chrC08	262	AAACCA	ARE	cis-acting regulatory element essential for the anaerobic induction
BnTPS24	chrC08	281	AAACCA	ARE	cis-acting regulatory element essential for the anaerobic induction
BnTPS25	chrC09_random	657	AAACCA	ARE	cis-acting regulatory element essential for the anaerobic induction
BnTPS7	chrA06	1417	CAAAGATATC	circadian	cis-acting regulatory element involved in circadian control
BnTPS11	chrA08	767	CAAAGATATC	circadian	cis-acting regulatory element involved in circadian control
BnTPS11	chrA08	1822	CAAAGATATC	circadian	cis-acting regulatory element involved in circadian control
BnTPS13	chrA09	1278	CAAAGATATC	circadian	cis-acting regulatory element involved in circadian control
BnTPS14	chrC01_random	986	CAAAGATATC	circadian	cis-acting regulatory element involved in circadian control
BnTPS14	chrC01_random	1018	CAAAGATATC	circadian	cis-acting regulatory element involved in circadian control
BnTPS17	chrC05	1433	CAAAGATATC	circadian	cis-acting regulatory element involved in circadian control
BnTPS22	chrC07_random	821	CAAAGATATC	circadian	cis-acting regulatory element involved in circadian control
BnTPS25	chrC09_random	1279	CAAAGATATC	circadian	cis-acting regulatory element involved in circadian control
BnTPS1	chrA01	1422	TAAACGTG	G-box	cis-acting regulatory element involved in light responsiveness
BnTPS1	chrA01	1793	CACGTG	G-box	cis-acting regulatory element involved in light responsiveness
BnTPS1	chrA01	1424	CACGTT	G-Box	cis-acting regulatory element involved in light responsiveness
BnTPS1	chrA01	1793	CACGTG	G-Box	cis-acting regulatory element involved in light responsiveness
BnTPS2	chrA02	110	CACGTT	G-Box	cis-acting regulatory element involved in light responsiveness
BnTPS2	chrA02	209	CACGTT	G-Box	cis-acting regulatory element involved in light responsiveness
BnTPS2	chrA02	1176	CACGTT	G-Box	cis-acting regulatory element involved in light responsiveness
BnTPS5	chrA03	336	CACGTC	G-box	cis-acting regulatory element involved in light responsiveness
BnTPS5	chrA03	597	CACGAC	G-box	cis-acting regulatory element involved in light responsiveness
BnTPS5	chrA03	795	CACGTC	G-box	cis-acting regulatory element involved in light responsiveness
BnTPS5	chrA03	1665	TACGTG	G-box	cis-acting regulatory element involved in light responsiveness
BnTPS5	chrA03	1820	TACGTG	G-box	cis-acting regulatory element involved in light responsiveness
BnTPS5	chrA03	1862	CACGTT	G-Box	cis-acting regulatory element involved in light responsiveness
BnTPS6	chrA03	1615	CACGAC	G-box	cis-acting regulatory element involved in light responsiveness
BnTPS7	chrA06	585	CACGTT	G-Box	cis-acting regulatory element involved in light responsiveness
BnTPS7	chrA06	741	CACGTT	G-Box	cis-acting regulatory element involved in light responsiveness
BnTPS7	chrA06	1392	TACGTG	G-box	cis-acting regulatory element involved in light responsiveness
BnTPS9	chrA07	1262	CACGTG	G-Box	cis-acting regulatory element involved in light responsiveness
BnTPS9	chrA07	1788	CACGTT	G-Box	cis-acting regulatory element involved in light responsiveness
BnTPS9	chrA07	604	CACGAC	G-box	cis-acting regulatory element involved in light responsiveness
BnTPS9	chrA07	1217	TACGTG	G-box	cis-acting regulatory element involved in light responsiveness
BnTPS9	chrA07	1260	GCCACGTGGA	G-box	cis-acting regulatory element involved in light responsiveness
BnTPS9	chrA07	1262	CACGTG	G-box	cis-acting regulatory element involved in light responsiveness
BnTPS9	chrA07	1418	CACGTC	G-box	cis-acting regulatory element involved in light responsiveness
BnTPS9	chrA07	1788	TAAACGTG	G-box	cis-acting regulatory element involved in light responsiveness
BnTPS11	chrA08	1376	CACGTT	G-Box	cis-acting regulatory element involved in light responsiveness
BnTPS11	chrA08	1605	CACGTT	G-Box	cis-acting regulatory element involved in light responsiveness
BnTPS11	chrA08	1887	CACGAC	G-box	cis-acting regulatory element involved in light responsiveness
BnTPS12	chrA08	93	TACGTG	G-box	cis-acting regulatory element involved in light responsiveness
BnTPS13	chrA09	105	ACACGTG(G/t)CACC	G-box	cis-acting regulatory element involved in light responsiveness
BnTPS13	chrA09	108	ACACGTGGC	G-box	cis-acting regulatory element involved in light responsiveness
BnTPS13	chrA09	110	CACGTG	G-box	cis-acting regulatory element involved in light responsiveness
BnTPS13	chrA09	395	CAGACGTGGCA	G-box	cis-acting regulatory element involved in light responsiveness
BnTPS13	chrA09	503	CACGTC	G-box	cis-acting regulatory element involved in light responsiveness
BnTPS13	chrA09	556	CACGTC	G-box	cis-acting regulatory element involved in light responsiveness
BnTPS13	chrA09	651	GCCACGTGGA	G-box	cis-acting regulatory element involved in light responsiveness
BnTPS13	chrA09	653	CACGTG	G-box	cis-acting regulatory element involved in light responsiveness
BnTPS13	chrA09	1560	CACGTC	G-box	cis-acting regulatory element involved in light responsiveness
BnTPS13	chrA09	110	CACGTG	G-Box	cis-acting regulatory element involved in light responsiveness
BnTPS13	chrA09	631	CACGTT	G-Box	cis-acting regulatory element involved in light responsiveness
BnTPS13	chrA09	653	CACGTG	G-Box	cis-acting regulatory element involved in light responsiveness
BnTPS14	chrC01_random	181	CACGTT	G-Box	cis-acting regulatory element involved in light responsiveness
BnTPS14	chrC01_random	1440	CACGTT	G-Box	cis-acting regulatory element involved in light responsiveness
BnTPS14	chrC01_random	1838	CACGTG	G-Box	cis-acting regulatory element involved in light responsiveness
BnTPS14	chrC01_random	1438	TAAACGTG	G-box	cis-acting regulatory element involved in light responsiveness
BnTPS14	chrC01_random	1760	CACGAC	G-box	cis-acting regulatory element involved in light responsiveness
BnTPS14	chrC01_random	1838	CACGTG	G-box	cis-acting regulatory element involved in light responsiveness
BnTPS15	chrC02	108	CACGTT	G-Box	cis-acting regulatory element involved in light responsiveness
BnTPS15	chrC02	206	CACGTT	G-Box	cis-acting regulatory element involved in light responsiveness
BnTPS15	chrC02	1169	CACGTT	G-Box	cis-acting regulatory element involved in light responsiveness
BnTPS16	chrC02	1647	CACGTC	G-box	cis-acting regulatory element involved in light responsiveness
BnTPS17	chrC05	731	tgACACGTGGCA	G-box	cis-acting regulatory element involved in light responsiveness
BnTPS17	chrC05	733	ACACGTGGC	G-box	cis-acting regulatory element involved in light responsiveness
BnTPS17	chrC05	734	CACGTG	G-box	cis-acting regulatory element involved in light responsiveness
BnTPS17	chrC05	1027	ACACGTGT	G-box	cis-acting regulatory element involved in light responsiveness
BnTPS17	chrC05	1028	CACGTG	G-box	cis-acting regulatory element involved in light responsiveness
BnTPS17	chrC05	734	CACGTG	G-Box	cis-acting regulatory element involved in light responsiveness
BnTPS17	chrC05	1028	CACGTG	G-Box	cis-acting regulatory element involved in light responsiveness
BnTPS17	chrC05	1408	CACGTT	G-Box	cis-acting regulatory element involved in light responsiveness
BnTPS19	chrC06	1251	CACGTG	G-Box	cis-acting regulatory element involved in light responsiveness
BnTPS19	chrC06	1771	CACGTT	G-Box	cis-acting regulatory element involved in light responsiveness
BnTPS19	chrC06	594	CACGAC	G-box	cis-acting regulatory element involved in light responsiveness
BnTPS19	chrC06	1206	TACGTG	G-box	cis-acting regulatory element involved in light responsiveness
BnTPS19	chrC06	1249	GCCACGTGGA	G-box	cis-acting regulatory element involved in light responsiveness
BnTPS19	chrC06	1251	CACGTG	G-box	cis-acting regulatory element involved in light responsiveness
BnTPS19	chrC06	1401	CACGTC	G-box	cis-acting regulatory element involved in light responsiveness
BnTPS22	chrC07_random	495	CACGTG	G-Box	cis-acting regulatory element involved in light responsiveness
BnTPS22	chrC07_random	1862	CACGTT	G-Box	cis-acting regulatory element involved in light responsiveness
BnTPS22	chrC07_random	492	tgACACGTGGCA	G-box	cis-acting regulatory element involved in light responsiveness
BnTPS22	chrC07_random	494	ACACGTGGC	G-box	cis-acting regulatory element involved in light responsiveness
BnTPS22	chrC07_random	495	CACGTG	G-box	cis-acting regulatory element involved in light responsiveness
BnTPS22	chrC07_random	1665	TACGTG	G-box	cis-acting regulatory element involved in light responsiveness
BnTPS22	chrC07_random	1820	TACGTG	G-box	cis-acting regulatory element involved in light responsiveness
BnTPS23	chrC08	260	TAACACGTAG	G-box	cis-acting regulatory element involved in light responsiveness
BnTPS23	chrC08	263	TACGTG	G-box	cis-acting regulatory element involved in light responsiveness
BnTPS24	chrC08	1334	CACGTT	G-Box	cis-acting regulatory element involved in light responsiveness
BnTPS24	chrC08	1576	CACGTT	G-Box	cis-acting regulatory element involved in light responsiveness
BnTPS24	chrC08	1871	CACGAC	G-box	cis-acting regulatory element involved in light responsiveness
BnTPS24	chrC08	1898	CACGTC	G-box	cis-acting regulatory element involved in light responsiveness
BnTPS25	chrC09_random	1152	ACACGTGT	G-box	cis-acting regulatory element involved in light responsiveness
BnTPS25	chrC09_random	1153	CACGTG	G-box	cis-acting regulatory element involved in light responsiveness
BnTPS25	chrC09_random	1559	CACGTC	G-box	cis-acting regulatory element involved in light responsiveness
BnTPS25	chrC09_random	1153	CACGTG	G-Box	cis-acting regulatory element involved in light responsiveness
BnTPS5	chrA03	1225	CATGCATG	RY-element	cis-acting regulatory element involved in seed-specific regulation
BnTPS1	chrA01	813	CGTCA	CGTCA-motif	cis-acting regulatory element involved in the MeJA-responsiveness
BnTPS1	chrA01	827	CGTCA	CGTCA-motif	cis-acting regulatory element involved in the MeJA-responsiveness
BnTPS1	chrA01	926	CGTCA	CGTCA-motif	cis-acting regulatory element involved in the MeJA-responsiveness
BnTPS1	chrA01	1077	CGTCA	CGTCA-motif	cis-acting regulatory element involved in the MeJA-responsiveness
BnTPS1	chrA01	1209	CGTCA	CGTCA-motif	cis-acting regulatory element involved in the MeJA-responsiveness
BnTPS1	chrA01	1790	CGTCA	CGTCA-motif	cis-acting regulatory element involved in the MeJA-responsiveness
BnTPS1	chrA01	813	TGACG	TGACG-motif	cis-acting regulatory element involved in the MeJA-responsiveness
BnTPS1	chrA01	827	TGACG	TGACG-motif	cis-acting regulatory element involved in the MeJA-responsiveness
BnTPS1	chrA01	926	TGACG	TGACG-motif	cis-acting regulatory element involved in the MeJA-responsiveness
BnTPS1	chrA01	1077	TGACG	TGACG-motif	cis-acting regulatory element involved in the MeJA-responsiveness
BnTPS1	chrA01	1209	TGACG	TGACG-motif	cis-acting regulatory element involved in the MeJA-responsiveness
BnTPS1	chrA01	1790	TGACG	TGACG-motif	cis-acting regulatory element involved in the MeJA-responsiveness
BnTPS2	chrA02	323	CGTCA	CGTCA-motif	cis-acting regulatory element involved in the MeJA-responsiveness
BnTPS2	chrA02	323	TGACG	TGACG-motif	cis-acting regulatory element involved in the MeJA-responsiveness
BnTPS3	chrA02	383	CGTCA	CGTCA-motif	cis-acting regulatory element involved in the MeJA-responsiveness
BnTPS3	chrA02	383	TGACG	TGACG-motif	cis-acting regulatory element involved in the MeJA-responsiveness
BnTPS4	chrA03	75	CGTCA	CGTCA-motif	cis-acting regulatory element involved in the MeJA-responsiveness
BnTPS4	chrA03	75	TGACG	TGACG-motif	cis-acting regulatory element involved in the MeJA-responsiveness
BnTPS5	chrA03	797	CGTCA	CGTCA-motif	cis-acting regulatory element involved in the MeJA-responsiveness
BnTPS5	chrA03	797	TGACG	TGACG-motif	cis-acting regulatory element involved in the MeJA-responsiveness
BnTPS6	chrA03	1361	CGTCA	CGTCA-motif	cis-acting regulatory element involved in the MeJA-responsiveness
BnTPS6	chrA03	1520	CGTCA	CGTCA-motif	cis-acting regulatory element involved in the MeJA-responsiveness
BnTPS6	chrA03	1361	TGACG	TGACG-motif	cis-acting regulatory element involved in the MeJA-responsiveness
BnTPS6	chrA03	1520	TGACG	TGACG-motif	cis-acting regulatory element involved in the MeJA-responsiveness
BnTPS11	chrA08	1316	CGTCA	CGTCA-motif	cis-acting regulatory element involved in the MeJA-responsiveness
BnTPS11	chrA08	1913	CGTCA	CGTCA-motif	cis-acting regulatory element involved in the MeJA-responsiveness
BnTPS11	chrA08	1982	CGTCA	CGTCA-motif	cis-acting regulatory element involved in the MeJA-responsiveness
BnTPS11	chrA08	1316	TGACG	TGACG-motif	cis-acting regulatory element involved in the MeJA-responsiveness
BnTPS11	chrA08	1913	TGACG	TGACG-motif	cis-acting regulatory element involved in the MeJA-responsiveness
BnTPS11	chrA08	1982	TGACG	TGACG-motif	cis-acting regulatory element involved in the MeJA-responsiveness
BnTPS13	chrA09	502	CGTCA	CGTCA-motif	cis-acting regulatory element involved in the MeJA-responsiveness
BnTPS13	chrA09	558	CGTCA	CGTCA-motif	cis-acting regulatory element involved in the MeJA-responsiveness
BnTPS13	chrA09	1562	CGTCA	CGTCA-motif	cis-acting regulatory element involved in the MeJA-responsiveness
BnTPS13	chrA09	502	TGACG	TGACG-motif	cis-acting regulatory element involved in the MeJA-responsiveness
BnTPS13	chrA09	558	TGACG	TGACG-motif	cis-acting regulatory element involved in the MeJA-responsiveness
BnTPS13	chrA09	1562	TGACG	TGACG-motif	cis-acting regulatory element involved in the MeJA-responsiveness
BnTPS14	chrC01_random	174	CGTCA	CGTCA-motif	cis-acting regulatory element involved in the MeJA-responsiveness
BnTPS14	chrC01_random	477	CGTCA	CGTCA-motif	cis-acting regulatory element involved in the MeJA-responsiveness
BnTPS14	chrC01_random	575	CGTCA	CGTCA-motif	cis-acting regulatory element involved in the MeJA-responsiveness
BnTPS14	chrC01_random	1229	CGTCA	CGTCA-motif	cis-acting regulatory element involved in the MeJA-responsiveness
BnTPS14	chrC01_random	1553	CGTCA	CGTCA-motif	cis-acting regulatory element involved in the MeJA-responsiveness
BnTPS14	chrC01_random	1835	CGTCA	CGTCA-motif	cis-acting regulatory element involved in the MeJA-responsiveness
BnTPS14	chrC01_random	174	TGACG	TGACG-motif	cis-acting regulatory element involved in the MeJA-responsiveness
BnTPS14	chrC01_random	477	TGACG	TGACG-motif	cis-acting regulatory element involved in the MeJA-responsiveness
BnTPS14	chrC01_random	575	TGACG	TGACG-motif	cis-acting regulatory element involved in the MeJA-responsiveness
BnTPS14	chrC01_random	1229	TGACG	TGACG-motif	cis-acting regulatory element involved in the MeJA-responsiveness
BnTPS14	chrC01_random	1553	TGACG	TGACG-motif	cis-acting regulatory element involved in the MeJA-responsiveness
BnTPS14	chrC01_random	1835	TGACG	TGACG-motif	cis-acting regulatory element involved in the MeJA-responsiveness
BnTPS15	chrC02	320	CGTCA	CGTCA-motif	cis-acting regulatory element involved in the MeJA-responsiveness
BnTPS15	chrC02	320	TGACG	TGACG-motif	cis-acting regulatory element involved in the MeJA-responsiveness
BnTPS16	chrC02	694	CGTCA	CGTCA-motif	cis-acting regulatory element involved in the MeJA-responsiveness
BnTPS16	chrC02	1553	CGTCA	CGTCA-motif	cis-acting regulatory element involved in the MeJA-responsiveness
BnTPS16	chrC02	694	TGACG	TGACG-motif	cis-acting regulatory element involved in the MeJA-responsiveness
BnTPS16	chrC02	1553	TGACG	TGACG-motif	cis-acting regulatory element involved in the MeJA-responsiveness
BnTPS20	chrC06	1161	CGTCA	CGTCA-motif	cis-acting regulatory element involved in the MeJA-responsiveness
BnTPS20	chrC06	1194	CGTCA	CGTCA-motif	cis-acting regulatory element involved in the MeJA-responsiveness
BnTPS20	chrC06	1161	TGACG	TGACG-motif	cis-acting regulatory element involved in the MeJA-responsiveness
BnTPS20	chrC06	1194	TGACG	TGACG-motif	cis-acting regulatory element involved in the MeJA-responsiveness
BnTPS23	chrC08	51	CGTCA	CGTCA-motif	cis-acting regulatory element involved in the MeJA-responsiveness
BnTPS23	chrC08	51	TGACG	TGACG-motif	cis-acting regulatory element involved in the MeJA-responsiveness
BnTPS24	chrC08	323	CGTCA	CGTCA-motif	cis-acting regulatory element involved in the MeJA-responsiveness
BnTPS24	chrC08	1272	CGTCA	CGTCA-motif	cis-acting regulatory element involved in the MeJA-responsiveness
BnTPS24	chrC08	1897	CGTCA	CGTCA-motif	cis-acting regulatory element involved in the MeJA-responsiveness
BnTPS24	chrC08	1983	CGTCA	CGTCA-motif	cis-acting regulatory element involved in the MeJA-responsiveness
BnTPS24	chrC08	323	TGACG	TGACG-motif	cis-acting regulatory element involved in the MeJA-responsiveness
BnTPS24	chrC08	1272	TGACG	TGACG-motif	cis-acting regulatory element involved in the MeJA-responsiveness
BnTPS24	chrC08	1897	TGACG	TGACG-motif	cis-acting regulatory element involved in the MeJA-responsiveness
BnTPS24	chrC08	1983	TGACG	TGACG-motif	cis-acting regulatory element involved in the MeJA-responsiveness
BnTPS25	chrC09_random	1561	CGTCA	CGTCA-motif	cis-acting regulatory element involved in the MeJA-responsiveness
BnTPS25	chrC09_random	1561	TGACG	TGACG-motif	cis-acting regulatory element involved in the MeJA-responsiveness
BnTPS4	chrA03	1574	GATGA(C/T)(A/G)TG(A/G)	O2-site	cis-acting regulatory element involved in zein metabolism regulation
BnTPS5	chrA03	178	GTTGACGTGA	O2-site	cis-acting regulatory element involved in zein metabolism regulation
BnTPS5	chrA03	794	GTTGACGTGA	O2-site	cis-acting regulatory element involved in zein metabolism regulation
BnTPS8	chrA06	1063	GATGACATGG	O2-site	cis-acting regulatory element involved in zein metabolism regulation
BnTPS8	chrA06	1119	GATGACATGG	O2-site	cis-acting regulatory element involved in zein metabolism regulation
BnTPS8	chrA06	1149	GATGACATGG	O2-site	cis-acting regulatory element involved in zein metabolism regulation
BnTPS11	chrA08	988	GTTGACGTGA	O2-site	cis-acting regulatory element involved in zein metabolism regulation
BnTPS12	chrA08	1864	GATGA(C/T)(A/G)TG(A/G)	O2-site	cis-acting regulatory element involved in zein metabolism regulation
BnTPS13	chrA09	523	GATGACATGG	O2-site	cis-acting regulatory element involved in zein metabolism regulation
BnTPS13	chrA09	555	GATGATGTGG	O2-site	cis-acting regulatory element involved in zein metabolism regulation
BnTPS14	chrC01_random	492	GATGA(C/T)(A/G)TG(A/G)	O2-site	cis-acting regulatory element involved in zein metabolism regulation
BnTPS17	chrC05	763	GATGATGTGG	O2-site	cis-acting regulatory element involved in zein metabolism regulation
BnTPS18	chrC05	959	GATGACATGG	O2-site	cis-acting regulatory element involved in zein metabolism regulation
BnTPS18	chrC05	1015	GATGACATGG	O2-site	cis-acting regulatory element involved in zein metabolism regulation
BnTPS20	chrC06	1163	GATGA(C/T)(A/G)TG(A/G)	O2-site	cis-acting regulatory element involved in zein metabolism regulation
BnTPS23	chrC08	1864	GATGA(C/T)(A/G)TG(A/G)	O2-site	cis-acting regulatory element involved in zein metabolism regulation
BnTPS24	chrC08	938	GTTGACGTGA	O2-site	cis-acting regulatory element involved in zein metabolism regulation
BnTPS24	chrC08	1895	GTTGACGTGA	O2-site	cis-acting regulatory element involved in zein metabolism regulation
BnTPS1	chrA01	1551	GCCACT	CAT-box	cis-acting regulatory element related to meristem expression
BnTPS2	chrA02	162	GCCACT	CAT-box	cis-acting regulatory element related to meristem expression
BnTPS3	chrA02	318	GCCACT	CAT-box	cis-acting regulatory element related to meristem expression
BnTPS3	chrA02	958	GCCACT	CAT-box	cis-acting regulatory element related to meristem expression
BnTPS3	chrA02	1203	GCCACT	CAT-box	cis-acting regulatory element related to meristem expression
BnTPS3	chrA02	1620	GCCACT	CAT-box	cis-acting regulatory element related to meristem expression
BnTPS5	chrA03	49	GCCACT	CAT-box	cis-acting regulatory element related to meristem expression
BnTPS6	chrA03	444	GCCACT	CAT-box	cis-acting regulatory element related to meristem expression
BnTPS7	chrA06	657	GCCACT	CAT-box	cis-acting regulatory element related to meristem expression
BnTPS7	chrA06	1220	GCCACT	CAT-box	cis-acting regulatory element related to meristem expression
BnTPS9	chrA07	1387	GCCACT	CAT-box	cis-acting regulatory element related to meristem expression
BnTPS10	chrA07	30	GCCACT	CAT-box	cis-acting regulatory element related to meristem expression
BnTPS13	chrA09	1319	GCCACT	CAT-box	cis-acting regulatory element related to meristem expression
BnTPS14	chrC01_random	1567	GCCACT	CAT-box	cis-acting regulatory element related to meristem expression
BnTPS15	chrC02	160	GCCACT	CAT-box	cis-acting regulatory element related to meristem expression
BnTPS16	chrC02	629	GCCACT	CAT-box	cis-acting regulatory element related to meristem expression
BnTPS16	chrC02	1382	GCCACT	CAT-box	cis-acting regulatory element related to meristem expression
BnTPS17	chrC05	191	GCCACT	CAT-box	cis-acting regulatory element related to meristem expression
BnTPS17	chrC05	1236	GCCACT	CAT-box	cis-acting regulatory element related to meristem expression
BnTPS19	chrC06	1370	GCCACT	CAT-box	cis-acting regulatory element related to meristem expression
BnTPS20	chrC06	1676	GCCACT	CAT-box	cis-acting regulatory element related to meristem expression
BnTPS23	chrC08	557	GCCACT	CAT-box	cis-acting regulatory element related to meristem expression
BnTPS25	chrC09_random	863	GCCACT	CAT-box	cis-acting regulatory element related to meristem expression
BnTPS25	chrC09_random	1319	GCCACT	CAT-box	cis-acting regulatory element related to meristem expression
BnTPS12	chrA08	369	TGAGTCA	GCN4_motif	cis-regulatory element involved in endosperm expression
BnTPS12	chrA08	1878	TGAGTCA	GCN4_motif	cis-regulatory element involved in endosperm expression
BnTPS23	chrC08	1878	TGAGTCA	GCN4_motif	cis-regulatory element involved in endosperm expression
BnTPS1	chrA01	602	CCTTTTG	P-box	gibberellin-responsive element
BnTPS1	chrA01	1406	CCTTTTG	P-box	gibberellin-responsive element
BnTPS1	chrA01	1971	CCTTTTG	P-box	gibberellin-responsive element
BnTPS4	chrA03	390	TCTGTTG	GARE-motif	gibberellin-responsive element
BnTPS4	chrA03	1612	TCTGTTG	GARE-motif	gibberellin-responsive element
BnTPS4	chrA03	1947	TCTGTTG	GARE-motif	gibberellin-responsive element
BnTPS4	chrA03	218	CCTTTTG	P-box	gibberellin-responsive element
BnTPS5	chrA03	1564	CCTTTTG	P-box	gibberellin-responsive element
BnTPS7	chrA06	529	CCTTTTG	P-box	gibberellin-responsive element
BnTPS7	chrA06	1545	CCTTTTG	P-box	gibberellin-responsive element
BnTPS8	chrA06	1961	CCTTTTG	P-box	gibberellin-responsive element
BnTPS9	chrA07	233	CCTTTTG	P-box	gibberellin-responsive element
BnTPS10	chrA07	378	CCTTTTG	P-box	gibberellin-responsive element
BnTPS10	chrA07	1628	CCTTTTG	P-box	gibberellin-responsive element
BnTPS10	chrA07	1822	CCTTTTG	P-box	gibberellin-responsive element
BnTPS12	chrA08	399	CCTTTTG	P-box	gibberellin-responsive element
BnTPS14	chrC01_random	1422	CCTTTTG	P-box	gibberellin-responsive element
BnTPS17	chrC05	1561	CCTTTTG	P-box	gibberellin-responsive element
BnTPS18	chrC05	1418	CCTTTTG	P-box	gibberellin-responsive element
BnTPS18	chrC05	1961	CCTTTTG	P-box	gibberellin-responsive element
BnTPS19	chrC06	219	CCTTTTG	P-box	gibberellin-responsive element
BnTPS20	chrC06	1632	CCTTTTG	P-box	gibberellin-responsive element
BnTPS22	chrC07_random	1564	CCTTTTG	P-box	gibberellin-responsive element
BnTPS24	chrC08	1522	CCTTTTG	P-box	gibberellin-responsive element
BnTPS2	chrA02	155	GGTTAA	GT1-motif	light responsive element
BnTPS2	chrA02	722	GGTTAA	GT1-motif	light responsive element
BnTPS2	chrA02	1349	GGTTAAT	GT1-motif	light responsive element
BnTPS2	chrA02	1350	GGTTAA	GT1-motif	light responsive element
BnTPS3	chrA02	289	GGTTAA	GT1-motif	light responsive element
BnTPS4	chrA03	45	GGTTAA	GT1-motif	light responsive element
BnTPS4	chrA03	1549	GGTTAA	GT1-motif	light responsive element
BnTPS6	chrA03	685	GGTTAA	GT1-motif	light responsive element
BnTPS6	chrA03	766	GGTTAA	GT1-motif	light responsive element
BnTPS7	chrA06	835	GGTTAA	GT1-motif	light responsive element
BnTPS9	chrA07	1977	TAAGAGAGGAA	3-AF1 binding site	light responsive element
BnTPS10	chrA07	1303	GGTTAAT	GT1-motif	light responsive element
BnTPS11	chrA08	1950	GGTTAA	GT1-motif	light responsive element
BnTPS12	chrA08	529	TAAGAGAGGAA	3-AF1 binding site	light responsive element
BnTPS12	chrA08	1625	TAAGAGAGGAA	3-AF1 binding site	light responsive element
BnTPS13	chrA09	221	GGTTAA	GT1-motif	light responsive element
BnTPS13	chrA09	1672	GGTTAAT	GT1-motif	light responsive element
BnTPS14	chrC01_random	955	GGTTAA	GT1-motif	light responsive element
BnTPS15	chrC02	720	GGTTAA	GT1-motif	light responsive element
BnTPS16	chrC02	241	GGTTAAT	GT1-motif	light responsive element
BnTPS16	chrC02	290	GGTTAAT	GT1-motif	light responsive element
BnTPS16	chrC02	327	GGTTAA	GT1-motif	light responsive element
BnTPS16	chrC02	600	GGTTAA	GT1-motif	light responsive element
BnTPS16	chrC02	725	GGTTAAT	GT1-motif	light responsive element
BnTPS16	chrC02	726	GGTTAA	GT1-motif	light responsive element
BnTPS16	chrC02	824	GGTTAAT	GT1-motif	light responsive element
BnTPS16	chrC02	1614	GGTTAAT	GT1-motif	light responsive element
BnTPS17	chrC05	850	GGTTAA	GT1-motif	light responsive element
BnTPS19	chrC06	547	GGTTAAT	GT1-motif	light responsive element
BnTPS19	chrC06	548	GGTTAA	GT1-motif	light responsive element
BnTPS20	chrC06	701	GGTTAAT	GT1-motif	light responsive element
BnTPS20	chrC06	782	GGTTAAT	GT1-motif	light responsive element
BnTPS21	chrC07	363	GGTTAAT	GT1-motif	light responsive element
BnTPS21	chrC07	1615	GGTTAA	GT1-motif	light responsive element
BnTPS23	chrC08	546	TAAGAGAGGAA	3-AF1 binding site	light responsive element
BnTPS25	chrC09_random	534	GGTTAA	GT1-motif	light responsive element
BnTPS25	chrC09_random	1673	GGTTAAT	GT1-motif	light responsive element
BnTPS2	chrA02	1446	CAACTG	MBS	MYB binding site involved in drought-inducibility
BnTPS6	chrA03	778	CAACTG	MBS	MYB binding site involved in drought-inducibility
BnTPS8	chrA06	1684	CAACTG	MBS	MYB binding site involved in drought-inducibility
BnTPS9	chrA07	954	CAACTG	MBS	MYB binding site involved in drought-inducibility
BnTPS9	chrA07	961	CAACTG	MBS	MYB binding site involved in drought-inducibility
BnTPS11	chrA08	1773	CAACTG	MBS	MYB binding site involved in drought-inducibility
BnTPS15	chrC02	1452	CAACTG	MBS	MYB binding site involved in drought-inducibility
BnTPS19	chrC06	941	CAACTG	MBS	MYB binding site involved in drought-inducibility
BnTPS19	chrC06	948	CAACTG	MBS	MYB binding site involved in drought-inducibility
BnTPS23	chrC08	360	CAACTG	MBS	MYB binding site involved in drought-inducibility
BnTPS2	chrA02	135	AACCTAA	MRE	MYB binding site involved in light responsiveness
BnTPS2	chrA02	592	AACCTAA	MRE	MYB binding site involved in light responsiveness
BnTPS5	chrA03	442	AACCTAA	MRE	MYB binding site involved in light responsiveness
BnTPS10	chrA07	1994	AACCTAA	MRE	MYB binding site involved in light responsiveness
BnTPS11	chrA08	1756	AACCTAA	MRE	MYB binding site involved in light responsiveness
BnTPS12	chrA08	1833	AACCTAA	MRE	MYB binding site involved in light responsiveness
BnTPS14	chrC01_random	584	AACCTAA	MRE	MYB binding site involved in light responsiveness
BnTPS14	chrC01_random	589	AACCTAA	MRE	MYB binding site involved in light responsiveness
BnTPS14	chrC01_random	754	AACCTAA	MRE	MYB binding site involved in light responsiveness
BnTPS15	chrC02	133	AACCTAA	MRE	MYB binding site involved in light responsiveness
BnTPS15	chrC02	590	AACCTAA	MRE	MYB binding site involved in light responsiveness
BnTPS16	chrC02	1489	AACCTAA	MRE	MYB binding site involved in light responsiveness
BnTPS17	chrC05	683	AACCTAA	MRE	MYB binding site involved in light responsiveness
BnTPS20	chrC06	1994	AACCTAA	MRE	MYB binding site involved in light responsiveness
BnTPS22	chrC07_random	1399	AACCTAA	MRE	MYB binding site involved in light responsiveness
BnTPS23	chrC08	1833	AACCTAA	MRE	MYB binding site involved in light responsiveness
BnTPS24	chrC08	1735	AACCTAA	MRE	MYB binding site involved in light responsiveness
BnTPS1	chrA01	1205	CAACGG	CCAAT-box	MYBHv1 binding site
BnTPS1	chrA01	1222	CAACGG	CCAAT-box	MYBHv1 binding site
BnTPS3	chrA02	1606	CAACGG	CCAAT-box	MYBHv1 binding site
BnTPS6	chrA03	1374	CAACGG	CCAAT-box	MYBHv1 binding site
BnTPS11	chrA08	1517	CAACGG	CCAAT-box	MYBHv1 binding site
BnTPS13	chrA09	120	CAACGG	CCAAT-box	MYBHv1 binding site
BnTPS13	chrA09	445	CAACGG	CCAAT-box	MYBHv1 binding site
BnTPS13	chrA09	536	CAACGG	CCAAT-box	MYBHv1 binding site
BnTPS13	chrA09	1750	CAACGG	CCAAT-box	MYBHv1 binding site
BnTPS14	chrC01_random	1242	CAACGG	CCAAT-box	MYBHv1 binding site
BnTPS24	chrC08	1475	CAACGG	CCAAT-box	MYBHv1 binding site

## Sheet: Table S4
Table S4. Predicted Protein Interactions of TPS Proteins in Brassica napus.
TPS gene ID	Interaction gene ID	Value	Type
BnTPS3	BnaA04g08400D	161	other
BnTPS3	BnaC04g30250D	161	other
BnTPS3	BnaA05g16960D	179	other
BnTPS3	BnaC05g29760D	179	other
BnTPS3	BnaA02g01810D	175	other
BnTPS3	BnaC02g04940D	175	other
BnTPS3	BnaA05g36120D	179	other
BnTPS3	BnaC05g31620D	179	other
BnTPS3	BnaA03g46780D	321	other
BnTPS3	BnaC01g16370D	321	other
BnTPS3	BnaC07g38990D	321	other
BnTPS3	BnaA10g03060D	668	other
BnTPS3	BnaC05g02930D	668	other
BnTPS3	BnaA10g26300D	473	other
BnTPS3	BnaAnng00810D	473	other
BnTPS3	BnaC02g02900D	473	other
BnTPS3	BnaC03g01440D	473	other
BnTPS3	BnaCnng10680D	473	other
BnTPS3	BnaA04g12000D	218	other
BnTPS3	BnaA09g43380D	218	other
BnTPS3	BnaC04g33690D	218	other
BnTPS3	BnaC08g35990D	218	other
BnTPS3	BnaA02g14100D	212	other
BnTPS3	BnaC02g18730D	212	other
BnTPS3	BnaA07g26220D	179	other
BnTPS3	BnaC06g28250D	179	other
BnTPS3	BnaA03g45390D	220	other
BnTPS3	BnaC03g65030D	220	other
BnTPS3	BnaC07g37320D	220	other
BnTPS3	BnaA03g03230D	668	other
BnTPS3	BnaA06g27590D	668	other
BnTPS3	BnaC03g04660D	668	other
BnTPS3	BnaC05g27770D	668	other
BnTPS3	BnaC07g29460D	668	other
BnTPS3	BnaA03g37150D	341	other
BnTPS3	BnaA07g05940D	341	other
BnTPS3	BnaC03g43420D	341	other
BnTPS3	BnaC07g07290D	341	other
BnTPS3	BnaA07g00510D	198	other
BnTPS3	BnaC07g00180D	198	other
BnTPS3	BnaC09g23870D	198	other
BnTPS3	BnaA06g00510D	215	other
BnTPS3	BnaC06g07120D	215	other
BnTPS3	BnaA06g05860D	153	other
BnTPS3	BnaA08g26070D	153	other
BnTPS3	BnaC05g07410D	153	other
BnTPS3	BnaCnng39630D	153	other
BnTPS3	BnaCnng51650D	153	other
BnTPS3	BnaA01g23200D	183	other
BnTPS3	BnaA07g05810D	183	other
BnTPS3	BnaC01g30200D	183	other
BnTPS3	BnaC09g21470D	183	other
BnTPS3	BnaA02g12120D	351	other
BnTPS3	BnaA07g03120D	351	other
BnTPS3	BnaA07g25280D	351	other
BnTPS3	BnaA07g25290D	351	other
BnTPS3	BnaC02g13730D	351	other
BnTPS3	BnaC06g27060D	351	other
BnTPS3	BnaC07g06200D	351	other
BnTPS3	BnaC09g44920D	351	other
BnTPS3	BnaA02g20120D	211	other
BnTPS3	BnaA02g20240D	211	other
BnTPS3	BnTPS2	729	other
BnTPS3	BnTPS15	729	inter
BnTPS3	BnaC02g29600D	729	other
BnTPS3	BnaC04g31780D	729	other
BnTPS3	BnaA03g04190D	249	other
BnTPS3	BnaA10g20180D	249	other
BnTPS3	BnaC03g05780D	249	other
BnTPS3	BnaC09g43980D	249	other
BnTPS3	BnaA01g34730D	165	other
BnTPS3	BnaA03g53830D	165	other
BnTPS3	BnaC01g01710D	165	other
BnTPS3	BnaCnng71740D	165	other
BnTPS3	BnaCnng39690D	165	other
BnTPS3	BnaA02g20870D	179	other
BnTPS3	BnaA03g25860D	179	other
BnTPS3	BnaC02g46770D	179	other
BnTPS3	BnaC03g30360D	179	other
BnTPS3	BnaC03g30380D	179	other
BnTPS3	BnaC05g26750D	179	other
BnTPS3	BnaA10g18430D	272	other
BnTPS3	BnaC09g41990D	272	other
BnTPS3	BnaA10g19460D	228	other
BnTPS3	BnaC09g54390D	228	other
BnTPS3	BnaA07g20590D	268	other
BnTPS3	BnaC06g20450D	268	other
BnTPS3	BnaA04g01120D	229	other
BnTPS3	BnaA07g18800D	229	other
BnTPS3	BnaA09g38720D	229	other
BnTPS3	BnaC04g22010D	229	other
BnTPS3	BnaC05g15760D	229	other
BnTPS3	BnaC08g30890D	229	other
BnTPS3	BnaCnng31080D	229	other
BnTPS3	BnaCnng31120D	229	other
BnTPS3	BnaA04g00250D	219	other
BnTPS3	BnaA09g40300D	219	other
BnTPS3	BnaA09g40310D	219	other
BnTPS3	BnaC08g32630D	219	other
BnTPS3	BnaA05g14670D	355	other
BnTPS3	BnaA06g01110D	355	other
BnTPS3	BnaC06g10070D	355	other
BnTPS3	BnaC06g41420D	355	other
BnTPS3	BnaA01g21720D	153	other
BnTPS3	BnaC01g27920D	153	other
BnTPS3	BnaA02g26490D	169	other
BnTPS3	BnaA04g05620D	169	other
BnTPS3	BnaA04g08220D	169	other
BnTPS3	BnaA06g06590D	169	other
BnTPS3	BnaA08g30520D	169	other
BnTPS3	BnaA09g29420D	169	other
BnTPS3	BnaA09g46140D	169	other
BnTPS3	BnaA10g29720D	169	other
BnTPS3	BnaC02g20250D	169	other
BnTPS3	BnaC04g24240D	169	other
BnTPS3	BnaC04g30390D	169	other
BnTPS3	BnaC07g23460D	169	other
BnTPS3	BnaC09g18460D	169	other
BnTPS3	BnaA07g32940D	392	other
BnTPS3	BnaC06g37460D	392	other
BnTPS3	BnaA06g39660D	327	other
BnTPS3	BnaA09g02760D	327	other
BnTPS3	BnaAnng07910D	327	other
BnTPS3	BnaC02g38230D	327	other
BnTPS3	BnaC07g26120D	327	other
BnTPS3	BnaA09g13590D	221	other
BnTPS3	BnaC09g13970D	221	other
BnTPS3	BnaCnng59750D	221	other
BnTPS3	BnaA09g20120D	218	other
BnTPS3	BnaC09g22450D	218	other
BnTPS3	BnaA03g14360D	309	other
BnTPS3	BnaA03g27390D	309	other
BnTPS3	BnaA03g39000D	309	other
BnTPS3	BnaA04g13160D	309	other
BnTPS3	BnaC03g16170D	309	other
BnTPS3	BnaC03g17420D	309	other
BnTPS3	BnaC03g32410D	309	other
BnTPS3	BnaC03g37110D	309	other
BnTPS3	BnaC03g46120D	309	other
BnTPS3	BnaA04g28590D	153	other
BnTPS3	BnaC04g04670D	153	other
BnTPS3	BnaC04g40560D	153	other
BnTPS3	BnaA05g12940D	668	other
BnTPS3	BnaC06g12120D	668	other
BnTPS3	BnaCnng74430D	668	other
BnTPS3	BnaA07g05600D	160	other
BnTPS3	BnaC07g07150D	160	other
BnTPS3	BnaA01g26450D	390	other
BnTPS3	BnaA01g27230D	390	other
BnTPS3	BnaA03g34480D	390	other
BnTPS3	BnaC01g34700D	390	other
BnTPS3	BnaC03g39900D	390	other
BnTPS3	BnaC03g39940D	390	other
BnTPS3	BnaA01g02900D	151	other
BnTPS3	BnaA03g51000D	151	other
BnTPS3	BnaC01g04170D	151	other
BnTPS3	BnaC07g44870D	151	other
BnTPS3	BnaA09g35630D	410	other
BnTPS3	BnaC08g27080D	410	other
BnTPS3	BnaC08g27090D	410	other
BnTPS3	BnaC08g27100D	410	other
BnTPS3	BnaC08g27120D	410	other
BnTPS3	BnaA06g33590D	166	other
BnTPS3	BnaA09g19450D	166	other
BnTPS3	BnaAnng22000D	166	other
BnTPS3	BnaAnng22010D	166	other
BnTPS3	BnaC02g35320D	166	other
BnTPS3	BnaC07g22680D	166	other
BnTPS3	BnaC09g22180D	166	other
BnTPS3	BnaA05g18680D	457	other
BnTPS3	BnaA08g04640D	457	other
BnTPS3	BnaA10g08890D	457	other
BnTPS3	BnaAnng29790D	457	other
BnTPS3	BnaC06g00520D	457	other
BnTPS3	BnaCnng21000D	457	other
BnTPS3	BnaA03g27270D	161	other
BnTPS3	BnaC03g32270D	161	other
BnTPS3	BnaA02g03140D	161	other
BnTPS3	BnaA10g17910D	161	other
BnTPS3	BnaC02g06690D	161	other
BnTPS3	BnaC09g41340D	161	other
BnTPS3	BnaAnng05390D	163	other
BnTPS3	BnaA05g04720D	182	other
BnTPS3	BnaAnng26460D	182	other
BnTPS3	BnaA05g36350D	179	other
BnTPS3	BnaA10g25820D	179	other
BnTPS3	BnaCnng20610D	179	other
BnTPS3	BnaA05g35800D	196	other
BnTPS3	BnaC05g28630D	196	other
BnTPS3	BnaA03g29410D	345	other
BnTPS3	BnaA05g30990D	345	other
BnTPS3	BnaAnng03180D	345	other
BnTPS3	BnaC03g34680D	345	other
BnTPS3	BnaC05g21760D	345	other
BnTPS3	BnaC05g45470D	345	other
BnTPS3	BnaC05g14070D	190	other
BnTPS3	BnaA02g04800D	668	other
BnTPS3	BnaA10g15120D	668	other
BnTPS3	BnaC09g37470D	668	other
BnTPS3	BnaA04g19140D	169	other
BnTPS3	BnaA05g10650D	169	other
BnTPS3	BnaC04g11710D	169	other
BnTPS3	BnaC04g43460D	169	other
BnTPS3	BnaA07g32360D	219	other
BnTPS3	BnaC06g22000D	219	other
BnTPS3	BnaC06g36810D	219	other
BnTPS3	BnaA06g21840D	167	other
BnTPS3	BnaC02g48260D	167	other
BnTPS3	BnaC03g74950D	167	other
BnTPS3	BnaAnng14650D	179	other
BnTPS3	BnaC04g17020D	179	other
BnTPS3	BnaC04g17040D	179	other
BnTPS3	BnaCnng32470D	179	other
BnTPS3	BnaA06g28150D	307	other
BnTPS3	BnaA09g04320D	307	other
BnTPS3	BnaC07g49560D	307	other
BnTPS3	BnaC09g03730D	307	other
BnTPS3	BnaA10g26930D	200	other
BnTPS3	BnaAnng00500D	200	other
BnTPS3	BnaC02g03470D	200	other
BnTPS3	BnaCnng03230D	200	other
BnTPS3	BnaA01g35070D	975	other
BnTPS3	BnaA03g46430D	975	other
BnTPS3	BnaC01g15870D	975	other
BnTPS3	BnaC03g56490D	975	other
BnTPS3	BnaC07g38690D	975	other
BnTPS3	BnaA08g04370D	249	other
BnTPS3	BnaA10g27860D	249	other
BnTPS3	BnaC06g00930D	249	other
BnTPS3	BnaC08g46630D	249	other
BnTPS3	BnaA03g03670D	153	other
BnTPS3	BnaA10g20680D	153	other
BnTPS3	BnaC03g05150D	153	other
BnTPS3	BnaC03g05160D	153	other
BnTPS3	BnaC03g05170D	153	other
BnTPS3	BnaC09g44700D	153	other
BnTPS3	BnaA06g03770D	161	other
BnTPS3	BnaC06g02010D	161	other
BnTPS3	BnaA01g28740D	352	other
BnTPS3	BnaA05g24340D	352	other
BnTPS3	BnaC01g36290D	352	other
BnTPS3	BnaC05g38350D	352	other
BnTPS3	BnaC09g34550D	352	other
BnTPS3	BnaC09g34560D	352	other
BnTPS3	BnaA02g23460D	674	other
BnTPS3	BnaC02g29300D	674	other
BnTPS3	BnaCnng65550D	674	other
BnTPS3	BnaA03g39820D	390	other
BnTPS3	BnaA09g05500D	390	other
BnTPS3	BnaAnng06660D	390	other
BnTPS3	BnaC02g41870D	390	other
BnTPS3	BnaC07g49790D	390	other
BnTPS3	BnaCnng52780D	390	other
BnTPS3	BnaCnng52790D	390	other
BnTPS3	BnaA07g00920D	689	other
BnTPS3	BnaA09g10080D	689	other
BnTPS3	BnaC07g01200D	689	other
BnTPS3	BnaC08g36510D	689	other
BnTPS3	BnaC09g10170D	689	other
BnTPS3	BnaA10g05030D	172	other
BnTPS3	BnaC06g01220D	172	other
BnTPS3	BnaA05g27020D	600	other
BnTPS3	BnaA07g04020D	600	other
BnTPS3	BnaAnng19820D	600	other
BnTPS3	BnaAnng24090D	600	other
BnTPS3	BnaC03g57470D	600	other
BnTPS3	BnaC04g28720D	600	other
BnTPS3	BnaC05g41130D	600	other
BnTPS3	BnaC06g09460D	600	other
BnTPS3	BnaC07g05280D	600	other
BnTPS3	BnaCnng00730D	600	other
BnTPS3	BnaA07g28350D	310	other
BnTPS3	BnaC06g30880D	310	other
BnTPS3	BnaA04g12990D	152	other
BnTPS3	BnaA09g42480D	152	other
BnTPS3	BnaC04g35060D	152	other
BnTPS3	BnaC08g34920D	152	other
BnTPS3	BnaA10g01280D	216	other
BnTPS3	BnaC05g01340D	216	other
BnTPS3	BnaA10g17760D	271	other
BnTPS3	BnaC09g41130D	271	other
BnTPS3	BnaA06g24960D	225	other
BnTPS3	BnaC03g48610D	225	other
BnTPS3	BnaC03g48620D	225	other
BnTPS3	BnaA03g59250D	568	other
BnTPS3	BnaA04g05950D	568	other
BnTPS3	BnaA09g32380D	568	other
BnTPS3	BnaC04g28570D	568	other
BnTPS3	BnaC05g27860D	568	other
BnTPS3	BnaC08g23150D	568	other
BnTPS3	BnaC09g53220D	568	other
BnTPS3	BnaA02g35990D	250	other
BnTPS3	BnaA07g21750D	250	other
BnTPS3	BnaC06g22470D	250	other
BnTPS3	BnaCnng08010D	250	other
BnTPS3	BnaA08g08070D	245	other
BnTPS3	BnaA09g25420D	245	other
BnTPS3	BnaC08g09320D	245	other
BnTPS3	BnaCnng10940D	245	other
BnTPS3	BnaA03g31030D	269	other
BnTPS3	BnaAnng37920D	269	other
BnTPS3	BnaC03g36340D	269	other
BnTPS3	BnaC03g36350D	269	other
BnTPS3	BnaA03g56880D	305	other
BnTPS3	BnaA04g26320D	305	other
BnTPS3	BnaA05g05010D	305	other
BnTPS3	BnaC04g50370D	305	other
BnTPS3	BnaC04g53290D	305	other
BnTPS3	BnaCnng36880D	305	other
BnTPS3	BnaA04g26930D	376	other
BnTPS3	BnaA05g00720D	376	other
BnTPS3	BnaC04g00330D	376	other
BnTPS3	BnaC04g51460D	376	other
BnTPS3	BnaA04g17670D	600	other
BnTPS3	BnaC04g41310D	600	other
BnTPS3	BnaA09g48710D	309	other
BnTPS3	BnaC01g08290D	309	other
BnTPS3	BnaC08g42960D	309	other
BnTPS3	BnaA04g12270D	709	other
BnTPS3	BnaA09g05340D	709	other
BnTPS3	BnaC04g33380D	709	other
BnTPS3	BnaUnng03050D	709	other
BnTPS3	BnaA07g34310D	217	other
BnTPS3	BnaC06g39080D	217	other
BnTPS3	BnaA09g00490D	341	other
BnTPS3	BnaCnng01190D	341	other
BnTPS3	BnaA01g00240D	172	other
BnTPS3	BnaA08g15820D	172	other
BnTPS3	BnaC01g01180D	172	other
BnTPS3	BnaC03g61220D	172	other
BnTPS3	BnaA03g23880D	179	other
BnTPS3	BnaAnng16650D	179	other
BnTPS3	BnaC03g28400D	179	other
BnTPS3	BnaC08g03780D	179	other
BnTPS3	BnaC08g03790D	179	other
BnTPS3	BnaC08g03940D	179	other
BnTPS3	BnaCnng67200D	179	other
BnTPS3	BnaA09g51390D	315	other
BnTPS3	BnaA10g01010D	315	other
BnTPS3	BnaC05g01120D	315	other
BnTPS3	BnaA06g14520D	259	other
BnTPS3	BnaA07g11360D	259	other
BnTPS3	BnaC05g15990D	259	other
BnTPS3	BnaC07g15270D	259	other
BnTPS3	BnaA02g12130D	281	other
BnTPS3	BnaC02g45250D	281	other
BnTPS3	BnaC04g14850D	281	other
BnTPS3	BnaA06g04100D	270	other
BnTPS3	BnaA06g04110D	270	other
BnTPS3	BnaA07g09830D	270	other
BnTPS3	BnaA09g29930D	270	other
BnTPS3	BnaC05g18860D	270	other
BnTPS3	BnaC07g13050D	270	other
BnTPS3	BnaCnng45230D	270	other
BnTPS3	BnaCnng45250D	270	other
BnTPS3	BnaA04g01910D	228	other
BnTPS3	BnaA07g17940D	228	other
BnTPS3	BnaA09g55140D	228	other
BnTPS3	BnaA09g55150D	228	other
BnTPS3	BnaC04g23500D	228	other
BnTPS3	BnaC06g16700D	228	other
BnTPS3	BnaC08g29320D	228	other
BnTPS3	BnaA09g38080D	167	other
BnTPS3	BnaC08g30060D	167	other
BnTPS3	BnaA05g08890D	245	other
BnTPS3	BnaC04g10300D	245	other
BnTPS3	BnaA04g12690D	949	other
BnTPS3	BnaCnng42030D	949	other
BnTPS3	BnaA04g08730D	153	other
BnTPS3	BnaC03g73180D	153	other
BnTPS3	BnaC04g31000D	153	other
BnTPS3	BnaC07g30900D	153	other
BnTPS3	BnaA02g20180D	155	other
BnTPS3	BnaAnng25170D	155	other
BnTPS3	BnaCnng23910D	155	other
BnTPS3	BnaA06g27940D	249	other
BnTPS3	BnaC04g14550D	249	other
BnTPS3	BnaC07g29000D	249	other
BnTPS3	BnaA02g02630D	216	other
BnTPS3	BnaA03g05430D	216	other
BnTPS3	BnaA10g18710D	216	other
BnTPS3	BnaC02g06070D	216	other
BnTPS3	BnaC02g29340D	216	other
BnTPS3	BnaC03g06960D	216	other
BnTPS3	BnaC09g42440D	216	other
BnTPS3	BnaA05g15840D	156	other
BnTPS3	BnaA06g02800D	156	other
BnTPS3	BnaA08g02130D	156	other
BnTPS3	BnaC01g21580D	156	other
BnTPS3	BnaC03g68660D	156	other
BnTPS3	BnaC05g26650D	156	other
BnTPS3	BnaC06g03640D	156	other
BnTPS3	BnaC06g03650D	156	other
BnTPS3	BnaC07g12240D	156	other
BnTPS3	BnaCnng58160D	156	other
BnTPS3	BnaA01g06610D	600	other
BnTPS3	BnaA03g50170D	600	other
BnTPS3	BnaC04g08650D	600	other
BnTPS3	BnaC07g42640D	600	other
BnTPS3	BnaCnng70410D	600	other
BnTPS3	BnaA06g29760D	219	other
BnTPS3	BnaC07g26980D	219	other
BnTPS3	BnaA06g29090D	208	other
BnTPS3	BnaC07g49450D	208	other
BnTPS3	BnaA01g12320D	956	other
BnTPS3	BnaA03g45430D	956	other
BnTPS3	BnaA03g45450D	956	other
BnTPS3	BnaC01g14030D	956	other
BnTPS3	BnaC07g37350D	956	other
BnTPS3	BnaC07g37370D	956	other
BnTPS3	BnaAnng37880D	182	other
BnTPS3	BnaC04g31100D	182	other
BnTPS3	BnaA06g05150D	198	other
BnTPS3	BnaA09g48720D	198	other
BnTPS3	BnaC05g06430D	198	other
BnTPS3	BnaC08g42970D	198	other
BnTPS3	BnaA04g03960D	152	other
BnTPS3	BnaA04g03970D	152	other
BnTPS3	BnaA09g34520D	152	other
BnTPS3	BnaC08g25470D	152	other
BnTPS3	BnaA03g44280D	163	other
BnTPS3	BnaA03g44310D	163	other
BnTPS3	BnaC07g36070D	163	other
BnTPS3	BnaA10g00780D	384	other
BnTPS3	BnaAnng17890D	384	other
BnTPS3	BnaC03g00040D	384	other
BnTPS3	BnaC05g00840D	384	other
BnTPS3	BnaC07g02670D	384	other
BnTPS3	BnaC07g02690D	384	other
BnTPS3	BnaCnng45140D	384	other
BnTPS3	BnaCnng45150D	384	other
BnTPS3	BnaCnng45160D	384	other
BnTPS3	BnaA08g13280D	166	other
BnTPS3	BnaAnng35020D	166	other
BnTPS3	BnaAnng26190D	166	other
BnTPS3	BnaC01g08460D	166	other
BnTPS3	BnaC03g68200D	166	other
BnTPS3	BnaC04g13460D	166	other
BnTPS3	BnaC06g03940D	166	other
BnTPS3	BnaC06g18760D	166	other
BnTPS3	BnaC07g42230D	166	other
BnTPS3	BnaA10g03820D	636	other
BnTPS3	BnaC05g03730D	636	other
BnTPS3	BnaA03g12920D	167	other
BnTPS3	BnaA10g07650D	167	other
BnTPS3	BnaC03g15750D	167	other
BnTPS3	BnaC08g01440D	167	other
BnTPS3	BnaC08g01450D	167	other
BnTPS3	BnaC08g01460D	167	other
BnTPS3	BnaCnng32750D	167	other
BnTPS3	BnaA02g35830D	153	other
BnTPS3	BnaA07g24360D	153	other
BnTPS3	BnaA07g27710D	153	other
BnTPS3	BnaA08g19700D	153	other
BnTPS3	BnaC02g44500D	153	other
BnTPS3	BnaC06g25500D	153	other
BnTPS3	BnaC06g29980D	153	other
BnTPS3	BnaA03g53180D	294	other
BnTPS3	BnaA08g10870D	294	other
BnTPS3	BnaAnng11640D	294	other
BnTPS3	BnaC01g03420D	294	other
BnTPS3	BnaC03g65530D	294	other
BnTPS3	BnaC04g21590D	294	other
BnTPS3	BnaC07g15160D	294	other
BnTPS3	BnaC07g45360D	294	other
BnTPS3	BnaA01g24440D	188	other
BnTPS3	BnaA03g36810D	188	other
BnTPS3	BnaA05g16860D	188	other
BnTPS3	BnaC05g29670D	188	other
BnTPS3	BnaC06g20460D	188	other
BnTPS3	BnaCnng37300D	188	other
BnTPS3	BnaCnng53960D	188	other
BnTPS3	BnaCnng14300D	188	other
BnTPS3	BnaA06g04850D	179	other
BnTPS3	BnaA08g26980D	179	other
BnTPS3	BnaA09g48900D	179	other
BnTPS3	BnaC08g13460D	179	other
BnTPS3	BnaC08g43180D	179	other
BnTPS3	BnaA08g07800D	351	other
BnTPS3	BnaC08g47460D	351	other
BnTPS3	BnaA03g02940D	290	other
BnTPS3	BnaC03g04340D	290	other
BnTPS3	BnaC06g25970D	290	other
BnTPS3	BnaA02g26550D	191	other
BnTPS3	BnaA06g34030D	191	other
BnTPS3	BnaA09g19140D	191	other
BnTPS3	BnaA10g23010D	191	other
BnTPS3	BnaC01g29990D	191	other
BnTPS3	BnaC02g34760D	191	other
BnTPS3	BnaC07g21870D	191	other
BnTPS3	BnaA02g07440D	169	other
BnTPS3	BnaC02g10510D	169	other
BnTPS3	BnaA06g40730D	764	other
BnTPS3	BnaC07g47330D	764	other
BnTPS3	BnaA01g04740D	185	other
BnTPS3	BnaC01g06270D	185	other
BnTPS3	BnaA03g00430D	208	other
BnTPS3	BnaC03g00320D	208	other
BnTPS3	BnaA10g26450D	179	other
BnTPS3	BnaCnng02680D	179	other
BnTPS3	BnaA01g12640D	683	other
BnTPS3	BnaA09g27810D	683	other
BnTPS3	BnaC03g58050D	683	other
BnTPS3	BnaC05g21440D	683	other
BnTPS3	BnaA02g00370D	215	other
BnTPS3	BnaA03g02820D	215	other
BnTPS3	BnaA03g13630D	215	other
BnTPS3	BnaA10g22080D	215	other
BnTPS3	BnaC02g00490D	215	other
BnTPS3	BnaC03g04170D	215	other
BnTPS3	BnaC03g16530D	215	other
BnTPS3	BnaC09g46500D	215	other
BnTPS3	BnaC09g46540D	215	other
BnTPS3	BnaA02g06370D	161	other
BnTPS3	BnaA02g06400D	161	other
BnTPS3	BnaA03g08920D	161	other
BnTPS3	BnaA05g11320D	161	other
BnTPS3	BnaA06g04440D	161	other
BnTPS3	BnaA09g49130D	161	other
BnTPS3	BnaA09g49140D	161	other
BnTPS3	BnaA09g49150D	161	other
BnTPS3	BnaA09g49160D	161	other
BnTPS3	BnaA10g23810D	161	other
BnTPS3	BnaAnng15460D	161	other
BnTPS3	BnaAnng31190D	161	other
BnTPS3	BnaC03g71520D	161	other
BnTPS3	BnaC03g71530D	161	other
BnTPS3	BnaC04g13200D	161	other
BnTPS3	BnaC05g05630D	161	other
BnTPS3	BnaC08g43440D	161	other
BnTPS3	BnaC08g43450D	161	other
BnTPS3	BnaCnng69410D	161	other
BnTPS3	BnaCnng38780D	161	other
BnTPS3	BnaA03g58390D	241	other
BnTPS3	BnaA04g13710D	241	other
BnTPS3	BnaA05g11750D	241	other
BnTPS3	BnaC02g44340D	241	other
BnTPS3	BnaC07g50180D	241	other
BnTPS3	BnaA03g18970D	323	other
BnTPS3	BnaC03g72510D	323	other
BnTPS3	BnaCnng27900D	323	other
BnTPS3	BnaA02g19000D	218	other
BnTPS3	BnaC02g25180D	218	other
BnTPS3	BnaA10g16310D	166	other
BnTPS3	BnaC02g08310D	166	other
BnTPS3	BnaC09g39160D	166	other
BnTPS3	BnaA02g34580D	964	other
BnTPS3	BnaA06g24090D	964	other
BnTPS3	BnaC03g49150D	964	other
BnTPS3	BnaC09g25400D	964	other
BnTPS3	BnaA03g19810D	152	other
BnTPS3	BnaA05g02840D	152	other
BnTPS3	BnaC03g10840D	152	other
BnTPS3	BnaC03g23710D	152	other
BnTPS3	BnaC04g52770D	152	other
BnTPS3	BnaA06g14510D	259	other
BnTPS3	BnaA07g11370D	259	other
BnTPS3	BnaA08g21730D	259	other
BnTPS3	BnaC05g15970D	259	other
BnTPS3	BnaC07g15280D	259	other
BnTPS3	BnaC08g19360D	259	other
BnTPS3	BnaA06g05870D	153	other
BnTPS3	BnaA08g26060D	153	other
BnTPS3	BnaA09g57170D	153	other
BnTPS3	BnaC03g53000D	153	other
BnTPS3	BnaC05g07420D	153	other
BnTPS3	BnaC08g42490D	153	other
BnTPS3	BnaCnng51660D	153	other
BnTPS3	BnaA05g34880D	183	other
BnTPS3	BnaAnng30320D	183	other
BnTPS3	BnaC04g53550D	183	other
BnTPS3	BnaC04g53560D	183	other
BnTPS3	BnaC04g53580D	183	other
BnTPS3	BnaA01g36280D	216	other
BnTPS3	BnaC01g29930D	216	other
BnTPS3	BnaC08g42000D	216	other
BnTPS3	BnaA03g40160D	394	other
BnTPS3	BnaC09g05250D	394	other
BnTPS3	BnaCnng43250D	394	other
BnTPS3	BnaA07g10320D	413	other
BnTPS3	BnaA09g30430D	413	other
BnTPS3	BnaC05g17970D	413	other
BnTPS3	BnaC07g13570D	413	other
BnTPS3	BnaA08g27410D	189	other
BnTPS3	BnaA08g27420D	189	other
BnTPS3	BnaA10g01800D	189	other
BnTPS3	BnaC05g01880D	189	other
BnTPS3	BnaC08g00230D	189	other
BnTPS3	BnaA05g07860D	179	other
BnTPS3	BnaAnng07370D	179	other
BnTPS3	BnaC04g08890D	179	other
BnTPS3	BnaA07g00650D	371	other
BnTPS3	BnaC07g00870D	371	other
BnTPS3	BnaC07g01640D	371	other
BnTPS3	BnaA01g19850D	206	other
BnTPS3	BnaA02g07080D	206	other
BnTPS3	BnaA03g09510D	206	other
BnTPS3	BnaA06g18020D	206	other
BnTPS3	BnaA06g20460D	206	other
BnTPS3	BnaA10g12390D	206	other
BnTPS3	BnaC02g10000D	206	other
BnTPS3	BnaC03g12030D	206	other
BnTPS3	BnaC03g55960D	206	other
BnTPS3	BnaC03g75050D	206	other
BnTPS3	BnaC09g34680D	206	other
BnTPS3	BnaA01g33020D	600	other
BnTPS3	BnaA03g27840D	600	other
BnTPS3	BnaC03g32890D	600	other
BnTPS3	BnaA07g25310D	238	other
BnTPS3	BnaA07g33120D	238	other
BnTPS3	BnaC02g23820D	238	other
BnTPS3	BnaC06g27090D	238	other
BnTPS3	BnaCnng48850D	238	other
BnTPS3	BnaA04g06610D	440	other
BnTPS3	BnaC04g29260D	440	other
BnTPS3	BnaC09g17630D	215	other
BnTPS3	BnaA01g20470D	224	other
BnTPS3	BnaC01g25750D	224	other
BnTPS3	BnaC03g52880D	224	other
BnTPS3	BnaC08g20460D	224	other
BnTPS3	BnaC08g20470D	224	other
BnTPS3	BnaCnng49920D	224	other
BnTPS3	BnaCnng55310D	224	other
BnTPS3	BnaA10g29450D	268	other
BnTPS3	BnaA03g22070D	224	other
BnTPS3	BnaA04g16520D	224	other
BnTPS3	BnaC03g26450D	224	other
BnTPS3	BnaC04g39860D	224	other
BnTPS3	BnaA10g19180D	153	other
BnTPS3	BnaC09g42880D	153	other
BnTPS3	BnaA03g44400D	215	other
BnTPS3	BnaC07g36250D	215	other
BnTPS3	BnaA01g19390D	161	other
BnTPS3	BnaA03g41350D	161	other
BnTPS3	BnaC01g23350D	161	other
BnTPS3	BnaC07g07520D	161	other
BnTPS3	BnaC07g32270D	161	other
BnTPS3	BnaA01g34430D	768	other
BnTPS3	BnaA05g32480D	768	other
BnTPS3	BnaAnng25620D	768	other
BnTPS3	BnaCnng53900D	768	other
BnTPS3	BnaCnng18460D	768	other
BnTPS3	BnaA02g21470D	600	other
BnTPS3	BnaA09g21060D	600	other
BnTPS3	BnaC02g28500D	600	other
BnTPS3	BnaC09g23320D	600	other
BnTPS3	BnaA09g00710D	776	other
BnTPS3	BnaCnng23260D	776	other
BnTPS3	BnaA02g12430D	212	other
BnTPS3	BnaCnng23850D	212	other
BnTPS3	BnaA08g26970D	169	other
BnTPS3	BnaC08g13480D	169	other
BnTPS3	BnaC08g13520D	169	other
BnTPS3	BnaC08g15170D	169	other
BnTPS3	BnaC08g15180D	169	other
BnTPS3	BnaA07g18060D	321	other
BnTPS3	BnaA09g55340D	321	other
BnTPS3	BnaC06g16920D	321	other
BnTPS3	BnaC06g27250D	321	other
BnTPS3	BnaC08g29540D	321	other
BnTPS3	BnaC09g10660D	321	other
BnTPS3	BnaA04g16720D	158	other
BnTPS3	BnaC04g40080D	158	other
BnTPS3	BnTPS9	731	inter
BnTPS3	BnTPS19	731	inter
BnTPS3	BnaA01g01080D	169	other
BnTPS3	BnaAnng18230D	169	other
BnTPS3	BnaC01g02100D	169	other
BnTPS3	BnaC07g46240D	169	other
BnTPS3	BnaA05g29880D	166	other
BnTPS3	BnaC01g39690D	166	other
BnTPS3	BnaC05g44190D	166	other
BnTPS3	BnaA09g16190D	257	other
BnTPS3	BnaC09g16980D	257	other
BnTPS3	BnaC09g16990D	257	other
BnTPS3	BnaA02g18730D	977	other
BnTPS3	BnaA02g18740D	977	other
BnTPS3	BnaA07g33960D	977	other
BnTPS3	BnaC02g24780D	977	other
BnTPS3	BnaC06g38600D	977	other
BnTPS3	BnaA02g29830D	327	other
BnTPS3	BnaA06g30890D	327	other
BnTPS3	BnaC02g37910D	327	other
BnTPS3	BnaC06g30220D	327	other
BnTPS3	BnaC06g30230D	327	other
BnTPS3	BnaC07g25770D	327	other
BnTPS3	BnaA04g12940D	153	other
BnTPS3	BnaA09g42570D	153	other
BnTPS3	BnaC04g34990D	153	other
BnTPS3	BnaC08g35030D	153	other
BnTPS3	BnaA01g25880D	225	other
BnTPS3	BnaA05g19350D	225	other
BnTPS3	BnaA06g02910D	225	other
BnTPS3	BnaC01g33070D	225	other
BnTPS3	BnaC05g32840D	225	other
BnTPS3	BnaC06g03410D	225	other
BnTPS3	BnaC06g03450D	225	other
BnTPS3	BnaC06g03470D	225	other
BnTPS3	BnaA02g08820D	166	other
BnTPS3	BnaA03g11100D	166	other
BnTPS3	BnaA03g11140D	166	other
BnTPS3	BnaC02g12690D	166	other
BnTPS3	BnaC02g13140D	166	other
BnTPS3	BnaC03g13470D	166	other
BnTPS3	BnaC03g13870D	166	other
BnTPS3	BnaC05g24360D	166	other
BnTPS3	BnaA01g01920D	347	other
BnTPS3	BnaC01g03060D	347	other
BnTPS3	BnaC03g62340D	347	other
BnTPS3	BnaA09g08300D	167	other
BnTPS3	BnaC09g08550D	167	other
BnTPS3	BnaA02g13060D	272	other
BnTPS3	BnaA07g25090D	272	other
BnTPS3	BnaA10g06620D	272	other
BnTPS3	BnaC02g45630D	272	other
BnTPS3	BnaA02g18110D	186	other
BnTPS3	BnaA03g35470D	186	other
BnTPS3	BnaA07g21370D	186	other
BnTPS3	BnaA07g32730D	186	other
BnTPS3	BnaA07g32740D	186	other
BnTPS3	BnaA07g32750D	186	other
BnTPS3	BnaC06g21850D	186	other
BnTPS3	BnaC06g37180D	186	other
BnTPS3	BnaC06g37190D	186	other
BnTPS3	BnaC06g37200D	186	other
BnTPS3	BnaC06g37210D	186	other
BnTPS3	BnaC06g37230D	186	other
BnTPS3	BnaCnng78100D	186	other
BnTPS3	BnaA02g09580D	169	other
BnTPS3	BnaA03g11850D	169	other
BnTPS3	BnaA04g13300D	169	other
BnTPS3	BnaA10g08330D	169	other
BnTPS3	BnaA10g28860D	169	other
BnTPS3	BnaA10g28340D	169	other
BnTPS3	BnaC02g44190D	169	other
BnTPS3	BnaC03g14590D	169	other
BnTPS3	BnaCnng78280D	169	other
BnTPS3	BnaCnng38420D	169	other
BnTPS3	BnaCnng16580D	169	other
BnTPS3	BnaUnng03800D	169	other
BnTPS3	BnaA03g17490D	154	other
BnTPS3	BnaC03g20930D	154	other
BnTPS3	BnaAnng18570D	600	other
BnTPS3	BnaA01g19540D	155	other
BnTPS3	BnaA03g41270D	155	other
BnTPS3	BnaA09g31840D	155	other
BnTPS3	BnaC01g42420D	155	other
BnTPS3	BnaC07g32160D	155	other
BnTPS3	BnaC08g22670D	155	other
BnTPS3	BnaA02g32330D	153	other
BnTPS3	BnaA06g27230D	153	other
BnTPS3	BnaC02g41050D	153	other
BnTPS3	BnaC07g29750D	153	other
BnTPS3	BnaA02g23650D	163	other
BnTPS3	BnaC02g31320D	163	other
BnTPS3	BnaA04g10460D	231	other
BnTPS3	BnaA07g15060D	231	other
BnTPS3	BnaC04g32730D	231	other
BnTPS3	BnaC06g42250D	231	other
BnTPS3	BnaA10g28400D	166	other
BnTPS3	BnaA10g28410D	166	other
BnTPS3	BnaC09g28660D	166	other
BnTPS3	BnaA09g15290D	415	other
BnTPS3	BnaCnng63310D	415	other
BnTPS3	BnaAnng38950D	714	other
BnTPS3	BnaC05g28320D	714	other
BnTPS3	BnaC05g28330D	714	other
BnTPS3	BnaA04g15260D	396	other
BnTPS3	BnaA09g40710D	396	other
BnTPS3	BnaC08g33210D	396	other
BnTPS3	BnaCnng51090D	396	other
BnTPS3	BnaA03g49230D	208	other
BnTPS3	BnaA05g29240D	208	other
BnTPS3	BnaCnng24280D	208	other
BnTPS3	BnaA02g29700D	544	other
BnTPS3	BnaA02g29720D	544	other
BnTPS3	BnaA06g31030D	544	other
BnTPS3	BnaC02g37730D	544	other
BnTPS3	BnaC07g25610D	544	other
BnTPS3	BnaA02g35770D	216	other
BnTPS3	BnaA07g24020D	216	other
BnTPS3	BnaA07g28470D	216	other
BnTPS3	BnaC06g25020D	216	other
BnTPS3	BnaC06g31040D	216	other
BnTPS3	BnaCnng49200D	216	other
BnTPS3	BnaA10g15860D	155	other
BnTPS3	BnaC09g54290D	155	other
BnTPS3	BnTPS1	728	other
BnTPS3	BnTPS6	728	inter
BnTPS3	BnTPS14	728	inter
BnTPS3	BnTPS26	728	inter
BnTPS3	BnaA06g35980D	245	other
BnTPS3	BnaC07g19140D	245	other
BnTPS3	BnaA07g25900D	407	other
BnTPS3	BnaC06g27510D	407	other
BnTPS3	BnaA01g30490D	177	other
BnTPS3	BnaA03g32320D	177	other
BnTPS3	BnaC01g38510D	177	other
BnTPS3	BnaC03g37680D	177	other
BnTPS3	BnaA07g34100D	217	other
BnTPS3	BnaA07g34110D	217	other
BnTPS3	BnaC02g44520D	217	other
BnTPS3	BnaC06g38730D	217	other
BnTPS3	BnaCnng53770D	217	other
BnTPS3	BnaCnng68120D	217	other
BnTPS3	BnaA03g34780D	161	other
BnTPS3	BnaA05g22420D	161	other
BnTPS3	BnaA09g27570D	161	other
BnTPS3	BnaA09g27970D	161	other
BnTPS3	BnaAnng27730D	161	other
BnTPS3	BnaC03g40250D	161	other
BnTPS3	BnaC05g35690D	161	other
BnTPS3	BnaC05g39460D	161	other
BnTPS3	BnaCnng57900D	161	other
BnTPS3	BnaA06g30310D	746	other
BnTPS3	BnaA07g04740D	746	other
BnTPS3	BnaCnng59960D	746	other
BnTPS3	BnaCnng00430D	746	other
BnTPS3	BnaAnng15110D	171	other
BnTPS3	BnaC03g49790D	171	other
BnTPS3	BnaA09g40940D	245	other
BnTPS3	BnaC08g33440D	245	other
BnTPS3	BnaA03g38540D	169	other
BnTPS3	BnaC03g45350D	169	other
BnTPS3	BnaA09g49760D	600	other
BnTPS3	BnaA10g27900D	600	other
BnTPS3	BnaC05g04690D	600	other
BnTPS3	BnaC08g44950D	600	other
BnTPS3	BnaA05g01360D	600	other
BnTPS3	BnaC04g07440D	600	other
BnTPS3	BnaC04g52090D	600	other
BnTPS3	BnaA03g08110D	668	other
BnTPS3	BnaA10g14710D	668	other
BnTPS3	BnaC03g10290D	668	other
BnTPS3	BnaC09g37040D	668	other
BnTPS3	BnaA04g04350D	204	other
BnTPS3	BnaAnng17190D	204	other
BnTPS3	BnaAnng17200D	204	other
BnTPS3	BnaC01g36210D	204	other
BnTPS3	BnaC03g05300D	204	other
BnTPS3	BnaC03g25780D	204	other
BnTPS3	BnaC03g28890D	204	other
BnTPS3	BnaC03g46500D	204	other
BnTPS3	BnaC03g76750D	204	other
BnTPS3	BnaC04g26530D	204	other
BnTPS3	BnaC06g15060D	204	other
BnTPS3	BnaC08g48810D	204	other
BnTPS3	BnaA06g17710D	327	other
BnTPS3	BnaC03g56240D	327	other
BnTPS3	BnaA01g35430D	174	other
BnTPS3	BnaA03g36320D	174	other
BnTPS3	BnaA03g41980D	174	other
BnTPS3	BnaC01g22400D	174	other
BnTPS3	BnaC03g42170D	174	other
BnTPS3	BnaC07g33090D	174	other
BnTPS3	BnaA03g22180D	165	other
BnTPS3	BnaA07g13930D	165	other
BnTPS3	BnaC03g46870D	165	other
BnTPS3	BnaC04g15750D	165	other
BnTPS3	BnaA07g17610D	175	other
BnTPS3	BnaA09g37280D	175	other
BnTPS3	BnaC06g16300D	175	other
BnTPS3	BnaC08g29020D	175	other
BnTPS3	BnaA06g23450D	153	other
BnTPS3	BnaC03g49710D	153	other
BnTPS3	BnaA03g17980D	613	other
BnTPS3	BnaA04g22110D	613	other
BnTPS3	BnaA05g06410D	613	other
BnTPS3	BnaC03g72160D	613	other
BnTPS3	BnaC04g06670D	613	other
BnTPS3	BnaC04g45840D	613	other
BnTPS3	BnaA01g01360D	270	other
BnTPS3	BnaA03g59170D	270	other
BnTPS3	BnaA07g05850D	270	other
BnTPS3	BnaA08g15200D	270	other
BnTPS3	BnaC01g02370D	270	other
BnTPS3	BnaC03g61970D	270	other
BnTPS3	BnaC05g26280D	270	other
BnTPS3	BnaC07g46060D	270	other
BnTPS3	BnaC09g47240D	270	other
BnTPS3	BnaA04g03460D	313	other
BnTPS3	BnaA09g35230D	313	other
BnTPS3	BnaC04g55570D	313	other
BnTPS3	BnaC08g26550D	313	other
BnTPS3	BnaA10g01360D	202	other
BnTPS3	BnaC05g01400D	202	other
BnTPS3	BnaA03g37710D	600	other
BnTPS3	BnaA07g05040D	600	other
BnTPS3	BnaC03g28580D	600	other
BnTPS3	BnaC03g74220D	600	other
BnTPS3	BnaC04g15340D	600	other
BnTPS3	BnaC08g30350D	600	other
BnTPS3	BnaCnng00120D	600	other
BnTPS3	BnTPS7	664	inter
BnTPS3	BnTPS8	664	inter
BnTPS3	BnTPS17	664	inter
BnTPS3	BnTPS18	664	inter
BnTPS3	BnaA03g36210D	371	other
BnTPS3	BnaA03g36220D	371	other
BnTPS3	BnaA05g36670D	371	other
BnTPS3	BnaC01g43670D	371	other
BnTPS3	BnaC03g42060D	371	other
BnTPS3	BnaCnng31360D	371	other
BnTPS3	BnaA03g20700D	272	other
BnTPS3	BnaA04g25600D	272	other
BnTPS3	BnaA05g03800D	272	other
BnTPS3	BnaC03g24730D	272	other
BnTPS3	BnaC04g03410D	272	other
BnTPS3	BnaC04g49500D	272	other
BnTPS3	BnaA04g19750D	275	other
BnTPS3	BnaC04g44130D	275	other
BnTPS3	BnaA06g40930D	600	other
BnTPS3	BnaCnng34200D	600	other
BnTPS3	BnaA06g39070D	307	other
BnTPS3	BnaCnng24550D	307	other
BnTPS3	BnaCnng78420D	307	other
BnTPS3	BnaCnng78500D	307	other
BnTPS3	BnaA01g09860D	269	other
BnTPS3	BnaA03g43910D	269	other
BnTPS3	BnaA08g09060D	269	other
BnTPS3	BnaC01g40980D	269	other
BnTPS3	BnaC03g63040D	269	other
BnTPS3	BnaC07g35730D	269	other
BnTPS3	BnaA04g09290D	412	other
BnTPS3	BnaC04g41770D	412	other
BnTPS3	BnaA02g19990D	192	other
BnTPS3	BnaC02g23310D	192	other
BnTPS3	BnaA07g34300D	223	other
BnTPS3	BnaC06g39060D	223	other
BnTPS3	BnaA01g04350D	157	other
BnTPS3	BnaA03g52140D	157	other
BnTPS3	BnaC01g05810D	157	other
BnTPS3	BnaC07g43880D	157	other
BnTPS3	BnTPS11	713	inter
BnTPS3	BnTPS24	713	inter
BnTPS3	BnaA01g29250D	605	other
BnTPS3	BnaA02g28840D	605	other
BnTPS3	BnaA04g00880D	605	other
BnTPS3	BnaA09g38850D	605	other
BnTPS3	BnaC04g21950D	605	other
BnTPS3	BnaC08g31110D	605	other
BnTPS3	BnaCnng75670D	605	other
BnTPS3	BnaUnng05030D	605	other
BnTPS3	BnaA01g19130D	269	other
BnTPS3	BnaC01g16860D	269	other
BnTPS3	BnaC01g22960D	269	other
BnTPS3	BnaA04g03360D	171	other
BnTPS3	BnaA07g16660D	171	other
BnTPS3	BnaA09g35380D	171	other
BnTPS3	BnaC04g25260D	171	other
BnTPS3	BnaC06g42620D	171	other
BnTPS3	BnaC08g26740D	171	other
BnTPS3	BnaA06g20780D	301	other
BnTPS3	BnaC03g53290D	301	other
BnTPS3	BnaCnng12040D	301	other
BnTPS3	BnaA02g31280D	220	other
BnTPS3	BnaA06g28590D	220	other
BnTPS3	BnaC02g39840D	220	other
BnTPS3	BnaC07g28200D	220	other
BnTPS3	BnaA01g17940D	215	other
BnTPS3	BnaA03g42940D	215	other
BnTPS3	BnaA08g08230D	215	other
BnTPS3	BnaC01g21190D	215	other
BnTPS3	BnaC07g34180D	215	other
BnTPS3	BnaC08g10900D	215	other
BnTPS3	BnaA06g14810D	351	other
BnTPS3	BnaC05g16270D	351	other
BnTPS3	BnaA03g52940D	181	other
BnTPS3	BnaA05g37430D	165	other
BnTPS3	BnaC05g40130D	165	other
BnTPS3	BnaC05g47480D	165	other
BnTPS3	BnaA03g25110D	957	other
BnTPS3	BnaA09g10560D	450	other
BnTPS3	BnaA09g10570D	450	other
BnTPS3	BnaA09g12880D	450	other
BnTPS3	BnaC09g10830D	450	other
BnTPS3	BnaC09g10840D	450	other
BnTPS3	BnaC09g13230D	450	other
BnTPS3	BnaA04g06460D	223	other
BnTPS3	BnaAnng08840D	223	other
BnTPS3	BnaCnng62500D	223	other
BnTPS3	BnaCnng19300D	223	other
BnTPS3	BnaAnng37790D	161	other
BnTPS3	BnaAnng29560D	161	other
BnTPS3	BnaAnng04500D	951	other
BnTPS3	BnaA06g13580D	159	other
BnTPS3	BnaA06g13670D	159	other
BnTPS3	BnaA09g44150D	159	other
BnTPS3	BnaAnng38010D	159	other
BnTPS3	BnaAnng04430D	159	other
BnTPS3	BnaC08g36710D	159	other
BnTPS3	BnaC08g48360D	159	other
BnTPS3	BnaA03g22260D	151	other
BnTPS3	BnaA04g16190D	151	other
BnTPS3	BnaA07g13530D	151	other
BnTPS3	BnaAnng28680D	151	other
BnTPS3	BnaC03g46980D	151	other
BnTPS3	BnaC03g47010D	151	other
BnTPS3	BnaC04g16310D	151	other
BnTPS3	BnaC04g39420D	151	other
BnTPS3	BnaC06g13040D	151	other
BnTPS3	BnaC08g07110D	151	other
BnTPS3	BnaC08g32800D	151	other
BnTPS3	BnaA03g04160D	155	other
BnTPS3	BnaA10g20210D	155	other
BnTPS3	BnaC03g05760D	155	other
BnTPS3	BnaC09g44020D	155	other
BnTPS3	BnaA02g06500D	183	other
BnTPS3	BnaA10g12930D	183	other
BnTPS3	BnaC09g35410D	183	other
BnTPS3	BnaA06g29670D	837	other
BnTPS3	BnaC02g31640D	837	other
BnTPS3	BnaC07g27090D	837	other
BnTPS3	BnaA01g18110D	181	other
BnTPS3	BnaA08g08130D	181	other
BnTPS3	BnaC01g21540D	181	other
BnTPS3	BnaC04g08790D	181	other
BnTPS3	BnaC04g09420D	181	other
BnTPS3	BnaC08g10770D	181	other
BnTPS3	BnaC08g48270D	181	other
BnTPS3	BnaCnng45490D	181	other
BnTPS3	BnaA02g02780D	242	other
BnTPS3	BnaA10g18510D	242	other
BnTPS3	BnaC02g06230D	242	other
BnTPS3	BnaC09g42080D	242	other
BnTPS3	BnaA01g29420D	152	other
BnTPS3	BnaA03g33370D	152	other
BnTPS3	BnaA05g25060D	152	other
BnTPS3	BnaC01g08070D	152	other
BnTPS3	BnaC01g36940D	152	other
BnTPS3	BnaC03g38540D	152	other
BnTPS3	BnaC05g39230D	152	other
BnTPS3	BnaC09g08480D	152	other
BnTPS3	BnaC09g39400D	152	other
BnTPS3	BnaCnng09830D	152	other
BnTPS3	BnTPS12	719	inter
BnTPS3	BnTPS23	719	inter
BnTPS3	BnaA04g16310D	198	other
BnTPS3	BnaC03g51730D	198	other
BnTPS3	BnaC04g39580D	198	other
BnTPS3	BnaA03g56770D	600	other
BnTPS3	BnaC03g25270D	600	other
BnTPS3	BnaA02g02760D	213	other
BnTPS3	BnaA03g05610D	213	other
BnTPS3	BnaC02g06210D	213	other
BnTPS3	BnaA08g04750D	564	other
BnTPS3	BnaC08g05510D	564	other
BnTPS3	BnaA03g18760D	313	other
BnTPS3	BnaA04g22810D	313	other
BnTPS3	BnaA05g05760D	313	other
BnTPS3	BnaC03g72600D	313	other
BnTPS3	BnaC04g05620D	313	other
BnTPS3	BnaC04g46630D	313	other
BnTPS3	BnaA07g37910D	267	other
BnTPS3	BnaA09g37270D	267	other
BnTPS3	BnaC06g16270D	267	other
BnTPS3	BnaC08g29000D	267	other
BnTPS3	BnaA01g17490D	175	other
BnTPS3	BnaC01g21820D	175	other
BnTPS3	BnaA05g23500D	163	other
BnTPS3	BnaC05g37200D	163	other
BnTPS3	BnaA03g19520D	231	other
BnTPS3	BnaA05g02270D	231	other
BnTPS3	BnaC03g23410D	231	other
BnTPS3	BnaC04g01960D	231	other
BnTPS3	BnaA04g23450D	231	other
BnTPS3	BnaC04g47330D	231	other
BnTPS3	BnaA05g15720D	179	other
BnTPS3	BnaA01g04120D	183	other
BnTPS3	BnaA03g02750D	183	other
BnTPS3	BnaA08g12000D	183	other
BnTPS3	BnaC01g05580D	183	other
BnTPS3	BnaC03g66890D	183	other
BnTPS3	BnaA10g16720D	198	other
BnTPS3	BnaC09g39740D	198	other
BnTPS3	BnaA05g05660D	179	other
BnTPS3	BnaC04g05440D	179	other
BnTPS3	BnaA10g15250D	155	other
BnTPS3	BnaC09g37680D	155	other
BnTPS3	BnaA06g06980D	217	other
BnTPS3	BnaC05g08630D	217	other
BnTPS3	BnaC08g14840D	217	other
BnTPS3	BnaC08g42130D	217	other
BnTPS3	BnaA01g08660D	743	other
BnTPS3	BnTPS4	743	inter
BnTPS3	BnaAnng13570D	743	other
BnTPS3	BnTPS21	743	inter
BnTPS3	BnaA01g33280D	482	other
BnTPS3	BnaA03g27640D	482	other
BnTPS3	BnaA05g34100D	482	other
BnTPS3	BnaC05g48600D	482	other
BnTPS3	BnaCnng29110D	482	other
BnTPS3	BnaA05g37180D	524	other
BnTPS3	BnaC01g40400D	524	other
BnTPS3	BnaC05g47720D	524	other
BnTPS3	BnaAnng41760D	209	other
BnTPS3	BnaAnng00830D	209	other
BnTPS3	BnaC02g02870D	209	other
BnTPS3	BnaC06g14420D	209	other
BnTPS3	BnaA01g01560D	156	other
BnTPS3	BnaAnng08360D	156	other
BnTPS3	BnaC07g45910D	156	other
BnTPS3	BnaA07g22680D	712	other
BnTPS3	BnaA07g30830D	712	other
BnTPS3	BnaC06g23590D	712	other
BnTPS3	BnaC06g34330D	712	other
BnTPS3	BnaA02g01610D	191	other
BnTPS3	BnaA03g04310D	191	other
BnTPS3	BnaA08g02750D	191	other
BnTPS3	BnaA10g19920D	191	other
BnTPS3	BnaC02g04730D	191	other
BnTPS3	BnaC03g05850D	191	other
BnTPS3	BnaC03g07200D	191	other
BnTPS3	BnaC09g43670D	191	other
BnTPS3	BnaA04g25760D	157	other
BnTPS3	BnaA05g04080D	157	other
BnTPS3	BnaC04g03820D	157	other
BnTPS3	BnaC04g49670D	157	other
BnTPS3	BnaA06g05900D	366	other
BnTPS3	BnaA09g57200D	366	other
BnTPS3	BnaC05g49240D	366	other
BnTPS3	BnaC08g42460D	366	other
BnTPS3	BnaA05g29950D	231	other
BnTPS3	BnaC05g44270D	231	other
BnTPS3	BnaA01g06230D	165	other
BnTPS3	BnaA01g06240D	165	other
BnTPS3	BnaC01g07510D	165	other
BnTPS3	BnaA02g03580D	181	other
BnTPS3	BnaA03g06610D	181	other
BnTPS3	BnaC02g44200D	181	other
BnTPS3	BnaC02g44220D	181	other
BnTPS3	BnaC03g08460D	181	other
BnTPS3	BnaA03g11110D	166	other
BnTPS3	BnaA03g11150D	166	other
BnTPS3	BnaC03g13880D	166	other
BnTPS3	BnaC03g13930D	166	other
BnTPS3	BnaA05g01050D	286	other
BnTPS3	BnaC04g00590D	286	other
BnTPS3	BnaA01g23480D	658	other
BnTPS3	BnaA03g37120D	658	other
BnTPS3	BnaA07g06190D	658	other
BnTPS3	BnaC03g74010D	658	other
BnTPS3	BnaC07g07730D	658	other
BnTPS3	BnaCnng44170D	658	other
BnTPS3	BnaA05g29010D	160	other
BnTPS3	BnaA10g27170D	160	other
BnTPS3	BnaAnng00330D	160	other
BnTPS3	BnaC02g03550D	160	other
BnTPS3	BnaC05g43490D	160	other
BnTPS3	BnaCnng40400D	160	other
BnTPS3	BnaA03g41010D	187	other
BnTPS3	BnaA07g12520D	187	other
BnTPS3	BnaA09g31530D	187	other
BnTPS3	BnaC07g16680D	187	other
BnTPS3	BnaC07g31920D	187	other
BnTPS3	BnaC08g22260D	187	other
BnTPS3	BnaA06g08310D	505	other
BnTPS3	BnaA09g47290D	505	other
BnTPS3	BnaC05g09640D	505	other
BnTPS3	BnaC08g41390D	505	other
BnTPS3	BnaA10g15850D	709	other
BnTPS3	BnaAnng08760D	709	other
BnTPS3	BnaC02g08620D	709	other
BnTPS3	BnaC09g54280D	709	other
BnTPS3	BnaA04g18860D	353	other
BnTPS3	BnaA04g28830D	353	other
BnTPS3	BnaA04g28960D	353	other
BnTPS3	BnaC04g43040D	353	other
BnTPS3	BnaC04g43060D	353	other
BnTPS3	BnaCnng21670D	353	other
BnTPS3	BnaCnng21680D	353	other
BnTPS3	BnaCnng37280D	353	other
BnTPS3	BnaA05g31220D	155	other
BnTPS3	BnaC05g45760D	155	other
BnTPS3	BnaA01g36640D	191	other
BnTPS3	BnaA03g35480D	191	other
BnTPS3	BnaA03g35490D	191	other
BnTPS3	BnaA05g19250D	191	other
BnTPS3	BnaC01g28090D	191	other
BnTPS3	BnaC01g32940D	191	other
BnTPS3	BnaC03g41250D	191	other
BnTPS3	BnaC03g41260D	191	other
BnTPS3	BnaC05g32770D	191	other
BnTPS3	BnaA03g15270D	152	other
BnTPS3	BnaC03g18410D	152	other
BnTPS3	BnaA06g36140D	328	other
BnTPS3	BnaA09g17880D	328	other
BnTPS3	BnaC07g18960D	328	other
BnTPS3	BnaC09g19200D	328	other
BnTPS3	BnaA09g21280D	189	other
BnTPS3	BnaC09g23670D	189	other
BnTPS3	BnaA04g03580D	218	other
BnTPS3	BnaA04g03590D	218	other
BnTPS3	BnaA07g37840D	218	other
BnTPS3	BnaA09g35020D	218	other
BnTPS3	BnaC04g25470D	218	other
BnTPS3	BnaC04g25490D	218	other
BnTPS3	BnaC08g26250D	218	other
BnTPS3	BnaA03g23570D	153	other
BnTPS3	BnaC03g27960D	153	other
BnTPS3	BnaA06g36400D	163	other
BnTPS3	BnaC07g17540D	163	other
BnTPS3	BnaAnng05700D	185	other
BnTPS3	BnaCnng34710D	185	other
BnTPS3	BnaA03g06500D	767	other
BnTPS3	BnaA03g28980D	767	other
BnTPS3	BnaC03g08320D	767	other
BnTPS3	BnaC03g08340D	767	other
BnTPS3	BnaA06g14710D	214	other
BnTPS3	BnaA08g21590D	214	other
BnTPS3	BnaC05g16100D	214	other
BnTPS3	BnaC05g16110D	214	other
BnTPS3	BnaC05g16120D	214	other
BnTPS3	BnaC08g19520D	214	other
BnTPS3	BnaA06g21560D	187	other
BnTPS3	BnaA09g19860D	187	other
BnTPS3	BnaC09g21860D	187	other
BnTPS3	BnaA06g35090D	392	other
BnTPS3	BnaA09g18520D	392	other
BnTPS3	BnaC09g20450D	392	other
BnTPS3	BnaA06g05210D	199	other
BnTPS3	BnaA08g26700D	199	other
BnTPS3	BnaA09g15640D	199	other
BnTPS3	BnaA09g48640D	199	other
BnTPS3	BnaC05g06500D	199	other
BnTPS3	BnaC08g42900D	199	other
BnTPS3	BnaCnng06500D	199	other
BnTPS3	BnaA08g20600D	344	other
BnTPS3	BnaA09g30060D	344	other
BnTPS3	BnaC05g18490D	344	other
BnTPS3	BnaC08g06210D	344	other
BnTPS3	BnaC08g06220D	344	other
BnTPS3	BnaA06g09180D	355	other
BnTPS3	BnaA06g09200D	355	other
BnTPS3	BnaA09g57130D	355	other
BnTPS3	BnaC05g10600D	355	other
BnTPS3	BnaC05g10610D	355	other
BnTPS3	BnaC08g39670D	355	other
BnTPS3	BnaA02g11230D	971	other
BnTPS3	BnaA10g07960D	971	other
BnTPS3	BnaAnng22210D	971	other
BnTPS3	BnaC09g27860D	971	other
BnTPS3	BnaA03g57500D	151	other
BnTPS3	BnaA05g23750D	151	other
BnTPS3	BnaA05g23760D	151	other
BnTPS3	BnaC03g39260D	151	other
BnTPS3	BnaC05g37550D	151	other
BnTPS3	BnaC05g37570D	151	other
BnTPS3	BnaA04g10140D	165	other
BnTPS3	BnaA04g11810D	165	other
BnTPS3	BnaC04g32260D	165	other
BnTPS3	BnaC04g33950D	165	other
BnTPS3	BnaA06g37150D	951	other
BnTPS3	BnaA08g16230D	951	other
BnTPS3	BnaAnng33310D	951	other
BnTPS3	BnaC03g60640D	951	other
BnTPS3	BnaC07g46980D	951	other
BnTPS3	BnaA07g24140D	154	other
BnTPS3	BnaA07g28240D	154	other
BnTPS3	BnaC06g25220D	154	other
BnTPS3	BnaC06g43570D	154	other
BnTPS3	BnaC08g03350D	154	other
BnTPS3	BnaA07g15990D	161	other
BnTPS3	BnaA09g33460D	161	other
BnTPS3	BnaC06g14440D	161	other
BnTPS3	BnaC08g24280D	161	other
BnTPS3	BnaA07g29500D	276	other
BnTPS3	BnaC01g23760D	276	other
BnTPS3	BnaC01g23770D	276	other
BnTPS3	BnaC03g24320D	276	other
BnTPS3	BnaC03g77430D	276	other
BnTPS3	BnaC03g71510D	276	other
BnTPS3	BnaC05g21630D	276	other
BnTPS3	BnaC06g32690D	276	other
BnTPS3	BnaA03g07280D	324	other
BnTPS3	BnaA06g06280D	324	other
BnTPS3	BnaA10g16260D	324	other
BnTPS3	BnaAnng39950D	324	other
BnTPS3	BnaC03g09230D	324	other
BnTPS3	BnaC05g08040D	324	other
BnTPS3	BnaC09g39110D	324	other
BnTPS3	BnaA09g50920D	278	other
BnTPS3	BnaA10g01960D	278	other
BnTPS3	BnaC08g45590D	278	other
BnTPS3	BnaC08g45680D	278	other
BnTPS3	BnaCnng43160D	278	other
BnTPS3	BnaA02g03420D	152	other
BnTPS3	BnaA10g17460D	152	other
BnTPS3	BnaC02g07060D	152	other
BnTPS3	BnaC09g40790D	152	other
BnTPS3	BnTPS5	662	inter
BnTPS3	BnTPS22	662	inter
BnTPS3	BnaA01g13990D	257	other
BnTPS3	BnaA03g46830D	257	other
BnTPS3	BnaC01g16480D	257	other
BnTPS3	BnaC07g39050D	257	other
BnTPS3	BnaC08g11700D	257	other
BnTPS3	BnaA04g10260D	192	other
BnTPS3	BnaC04g56100D	192	other
BnTPS3	BnaA04g07450D	161	other
BnTPS3	BnaA08g29950D	161	other
BnTPS3	BnaC04g29670D	161	other
BnTPS3	BnaC08g07930D	161	other
BnTPS3	BnaA03g26370D	272	other
BnTPS3	BnaA09g00540D	272	other
BnTPS3	BnaC03g31160D	272	other
BnTPS3	BnaCnng01120D	272	other
BnTPS3	BnaA02g01670D	305	other
BnTPS3	BnaA03g04360D	305	other
BnTPS3	BnaC02g04790D	305	other
BnTPS3	BnaC03g05900D	305	other
BnTPS3	BnaC03g35740D	305	other
BnTPS3	BnaC05g30160D	305	other
BnTPS3	BnaC07g35230D	305	other
BnTPS3	BnaCnng72250D	305	other
BnTPS3	BnaA01g05990D	157	other
BnTPS3	BnaA03g51370D	157	other
BnTPS3	BnaC01g07250D	157	other
BnTPS3	BnaC07g43200D	157	other
BnTPS3	BnaCnng62940D	157	other
BnTPS3	BnaA06g08320D	191	other
BnTPS3	BnaC05g09650D	191	other
BnTPS3	BnaA03g55140D	382	other
BnTPS3	BnaA10g07730D	382	other
BnTPS3	BnaCnng44490D	382	other
BnTPS3	BnaA02g35440D	166	other
BnTPS3	BnaA03g10790D	166	other
BnTPS3	BnaC02g12680D	166	other
BnTPS3	BnaC02g12700D	166	other
BnTPS3	BnaC02g12750D	166	other
BnTPS3	BnaA02g30480D	303	other
BnTPS3	BnaA06g39620D	303	other
BnTPS3	BnaA09g03180D	303	other
BnTPS3	BnaC02g38810D	303	other
BnTPS3	BnaC07g26830D	303	other
BnTPS3	BnaC09g02610D	303	other
BnTPS3	BnTPS13	731	inter
BnTPS3	BnTPS25	731	inter
BnTPS3	BnaA06g12710D	600	other
BnTPS3	BnaA08g22570D	600	other
BnTPS3	BnaA09g56080D	600	other
BnTPS3	BnaC05g14260D	600	other
BnTPS3	BnaC08g18100D	600	other
BnTPS3	BnaC08g18110D	600	other
BnTPS3	BnaC08g37140D	600	other
BnTPS3	BnaAnng06130D	216	other
BnTPS3	BnaC02g01150D	216	other
BnTPS3	BnaC03g03530D	216	other
BnTPS3	BnaCnng62740D	216	other
BnTPS3	BnaA05g34460D	159	other
BnTPS3	BnaC04g52970D	159	other
BnTPS3	BnaA04g09140D	216	other
BnTPS3	BnaA06g30860D	216	other
BnTPS3	BnaA07g14670D	216	other
BnTPS3	BnaC06g12620D	216	other
BnTPS3	BnaC07g25800D	216	other
BnTPS3	BnaA03g48990D	179	other
BnTPS3	BnaA08g13880D	179	other
BnTPS3	BnaC07g41200D	179	other
BnTPS3	BnaC08g12860D	179	other
BnTPS3	BnaA04g19840D	363	other
BnTPS3	BnaA05g09840D	363	other
BnTPS3	BnaC03g18800D	363	other
BnTPS3	BnaC04g44230D	363	other
BnTPS3	BnaCnng05200D	363	other
BnTPS3	BnaA05g19110D	528	other
BnTPS3	BnaC05g32490D	528	other
BnTPS3	BnaA05g10520D	264	other
BnTPS3	BnaA08g29810D	264	other
BnTPS3	BnaC04g11560D	264	other
BnTPS3	BnaC08g46760D	264	other
BnTPS3	BnaCnng53590D	264	other
BnTPS4	BnaA08g28830D	599	other
BnTPS4	BnaA10g04550D	599	other
BnTPS4	BnaAnng15770D	599	other
BnTPS4	BnaC05g04910D	599	other
BnTPS4	BnaC08g01990D	599	other
BnTPS4	BnaC08g45130D	599	other
BnTPS4	BnaA04g08160D	167	other
BnTPS4	BnaA04g08400D	167	other
BnTPS4	BnaC04g30250D	167	other
BnTPS4	BnaA01g37220D	150	other
BnTPS4	BnaA05g25600D	150	other
BnTPS4	BnaC01g37450D	150	other
BnTPS4	BnaC05g39500D	150	other
BnTPS4	BnaA05g36120D	179	other
BnTPS4	BnaC05g31620D	179	other
BnTPS4	BnaA09g54910D	198	other
BnTPS4	BnaC08g24860D	198	other
BnTPS4	BnaA10g03060D	791	other
BnTPS4	BnaC05g02930D	791	other
BnTPS4	BnaA04g12000D	218	other
BnTPS4	BnaA09g43380D	218	other
BnTPS4	BnaC04g33690D	218	other
BnTPS4	BnaC08g35990D	218	other
BnTPS4	BnaA07g07410D	157	other
BnTPS4	BnaA08g17440D	157	other
BnTPS4	BnaA09g26270D	157	other
BnTPS4	BnaC02g40240D	157	other
BnTPS4	BnaC03g76090D	157	other
BnTPS4	BnaC03g76100D	157	other
BnTPS4	BnaC03g76160D	157	other
BnTPS4	BnaC07g09070D	157	other
BnTPS4	BnaCnng41590D	157	other
BnTPS4	BnaA03g03230D	668	other
BnTPS4	BnaA06g27590D	668	other
BnTPS4	BnaC03g04660D	668	other
BnTPS4	BnaC05g27770D	668	other
BnTPS4	BnaC07g29460D	668	other
BnTPS4	BnaA01g21820D	263	other
BnTPS4	BnaA03g11290D	263	other
BnTPS4	BnaA10g09810D	263	other
BnTPS4	BnaC01g28140D	263	other
BnTPS4	BnaC03g71700D	263	other
BnTPS4	BnaC09g32260D	263	other
BnTPS4	BnaUnng01760D	263	other
BnTPS4	BnaA03g37150D	341	other
BnTPS4	BnaA07g05940D	341	other
BnTPS4	BnaC03g43420D	341	other
BnTPS4	BnaC07g07290D	341	other
BnTPS4	BnaA07g00510D	198	other
BnTPS4	BnaC07g00180D	198	other
BnTPS4	BnaC09g23870D	198	other
BnTPS4	BnaA05g06780D	186	other
BnTPS4	BnaA05g06790D	186	other
BnTPS4	BnaA05g06800D	186	other
BnTPS4	BnaC04g53460D	186	other
BnTPS4	BnaC04g53480D	186	other
BnTPS4	BnaA06g05860D	153	other
BnTPS4	BnaA08g26070D	153	other
BnTPS4	BnaC05g07410D	153	other
BnTPS4	BnaCnng39630D	153	other
BnTPS4	BnaCnng51650D	153	other
BnTPS4	BnaA01g23200D	183	other
BnTPS4	BnaA07g05810D	183	other
BnTPS4	BnaC01g30200D	183	other
BnTPS4	BnaC09g21470D	183	other
BnTPS4	BnTPS2	665	other
BnTPS4	BnTPS15	665	inter
BnTPS4	BnaC02g29600D	665	other
BnTPS4	BnaC04g31780D	665	other
BnTPS4	BnaA02g20870D	179	other
BnTPS4	BnaA03g25860D	179	other
BnTPS4	BnaC02g46770D	179	other
BnTPS4	BnaC03g30360D	179	other
BnTPS4	BnaC03g30380D	179	other
BnTPS4	BnaC05g26750D	179	other
BnTPS4	BnaA10g19460D	228	other
BnTPS4	BnaC09g54390D	228	other
BnTPS4	BnaA01g21720D	153	other
BnTPS4	BnaC01g27920D	153	other
BnTPS4	BnaA02g26490D	169	other
BnTPS4	BnaA04g05620D	169	other
BnTPS4	BnaA04g08220D	169	other
BnTPS4	BnaA06g06590D	169	other
BnTPS4	BnaA08g30520D	169	other
BnTPS4	BnaA09g29420D	169	other
BnTPS4	BnaA09g46140D	169	other
BnTPS4	BnaA10g29720D	169	other
BnTPS4	BnaC02g20250D	169	other
BnTPS4	BnaC04g24240D	169	other
BnTPS4	BnaC04g30390D	169	other
BnTPS4	BnaC07g23460D	169	other
BnTPS4	BnaC09g18460D	169	other
BnTPS4	BnaA06g39660D	258	other
BnTPS4	BnaA09g02760D	258	other
BnTPS4	BnaAnng07910D	258	other
BnTPS4	BnaC02g38230D	258	other
BnTPS4	BnaC07g26120D	258	other
BnTPS4	BnaA09g13590D	221	other
BnTPS4	BnaC09g13970D	221	other
BnTPS4	BnaCnng59750D	221	other
BnTPS4	BnaA05g12940D	668	other
BnTPS4	BnaC06g12120D	668	other
BnTPS4	BnaCnng74430D	668	other
BnTPS4	BnaA07g05600D	938	other
BnTPS4	BnaC07g07150D	938	other
BnTPS4	BnaA05g30860D	412	other
BnTPS4	BnaC05g45320D	412	other
BnTPS4	BnaA06g33590D	166	other
BnTPS4	BnaA09g19450D	166	other
BnTPS4	BnaAnng22000D	166	other
BnTPS4	BnaAnng22010D	166	other
BnTPS4	BnaC02g35320D	166	other
BnTPS4	BnaC07g22680D	166	other
BnTPS4	BnaC09g22180D	166	other
BnTPS4	BnaA05g18680D	151	other
BnTPS4	BnaA08g04640D	151	other
BnTPS4	BnaA10g08890D	151	other
BnTPS4	BnaAnng29790D	151	other
BnTPS4	BnaC06g00520D	151	other
BnTPS4	BnaCnng21000D	151	other
BnTPS4	BnaA02g03140D	161	other
BnTPS4	BnaA10g17910D	161	other
BnTPS4	BnaC02g06690D	161	other
BnTPS4	BnaC09g41340D	161	other
BnTPS4	BnaAnng05390D	163	other
BnTPS4	BnaA05g36350D	179	other
BnTPS4	BnaA10g25820D	179	other
BnTPS4	BnaCnng20610D	179	other
BnTPS4	BnaA02g04800D	807	other
BnTPS4	BnaA10g15120D	807	other
BnTPS4	BnaC09g37470D	807	other
BnTPS4	BnaA03g24030D	362	other
BnTPS4	BnaC03g28560D	362	other
BnTPS4	BnaA07g32360D	219	other
BnTPS4	BnaC06g22000D	219	other
BnTPS4	BnaC06g36810D	219	other
BnTPS4	BnaA03g53140D	159	other
BnTPS4	BnaA07g02700D	159	other
BnTPS4	BnaC01g44200D	159	other
BnTPS4	BnaC03g47830D	159	other
BnTPS4	BnaA06g08910D	234	other
BnTPS4	BnaAnng30620D	234	other
BnTPS4	BnaC05g10230D	234	other
BnTPS4	BnaAnng14650D	179	other
BnTPS4	BnaC04g17020D	179	other
BnTPS4	BnaC04g17040D	179	other
BnTPS4	BnaCnng32470D	179	other
BnTPS4	BnaA01g07170D	269	other
BnTPS4	BnaC01g08650D	269	other
BnTPS4	BnaC08g07090D	269	other
BnTPS4	BnaC09g25820D	269	other
BnTPS4	BnaA01g35070D	974	other
BnTPS4	BnaA03g46430D	974	other
BnTPS4	BnaC01g15870D	974	other
BnTPS4	BnaC03g56490D	974	other
BnTPS4	BnaC07g38690D	974	other
BnTPS4	BnaA08g04370D	169	other
BnTPS4	BnaA10g27860D	169	other
BnTPS4	BnaC06g00930D	169	other
BnTPS4	BnaC08g46630D	169	other
BnTPS4	BnaA01g23550D	405	other
BnTPS4	BnaA05g15190D	405	other
BnTPS4	BnaAnng22300D	405	other
BnTPS4	BnaC03g07280D	405	other
BnTPS4	BnaC03g68840D	405	other
BnTPS4	BnaCnng26890D	405	other
BnTPS4	BnaCnng51720D	405	other
BnTPS4	BnaA03g03670D	272	other
BnTPS4	BnaA10g20680D	272	other
BnTPS4	BnaC03g05150D	272	other
BnTPS4	BnaC03g05160D	272	other
BnTPS4	BnaC03g05170D	272	other
BnTPS4	BnaC09g44700D	272	other
BnTPS4	BnaA03g19860D	356	other
BnTPS4	BnaC03g23850D	356	other
BnTPS4	BnaA03g22890D	268	other
BnTPS4	BnaC03g26940D	268	other
BnTPS4	BnaC04g36830D	268	other
BnTPS4	BnaA06g03770D	161	other
BnTPS4	BnaC06g02010D	161	other
BnTPS4	BnaA04g20730D	155	other
BnTPS4	BnaC04g56520D	155	other
BnTPS4	BnaA02g23460D	668	other
BnTPS4	BnaC02g29300D	668	other
BnTPS4	BnaCnng65550D	668	other
BnTPS4	BnaA07g00920D	271	other
BnTPS4	BnaA09g10080D	271	other
BnTPS4	BnaC07g01200D	271	other
BnTPS4	BnaC08g36510D	271	other
BnTPS4	BnaC09g10170D	271	other
BnTPS4	BnaA10g05030D	527	other
BnTPS4	BnaC06g01220D	527	other
BnTPS4	BnaA05g27020D	600	other
BnTPS4	BnaA07g04020D	600	other
BnTPS4	BnaAnng19820D	600	other
BnTPS4	BnaAnng24090D	600	other
BnTPS4	BnaC03g57470D	600	other
BnTPS4	BnaC04g28720D	600	other
BnTPS4	BnaC05g41130D	600	other
BnTPS4	BnaC06g09460D	600	other
BnTPS4	BnaC07g05280D	600	other
BnTPS4	BnaCnng00730D	600	other
BnTPS4	BnaA07g28350D	219	other
BnTPS4	BnaC06g30880D	219	other
BnTPS4	BnaA03g55860D	197	other
BnTPS4	BnaC03g03990D	197	other
BnTPS4	BnaC03g60510D	197	other
BnTPS4	BnaA08g23520D	410	other
BnTPS4	BnaC08g17020D	410	other
BnTPS4	BnaA03g59250D	393	other
BnTPS4	BnaA04g05950D	393	other
BnTPS4	BnaA09g32380D	393	other
BnTPS4	BnaC04g28570D	393	other
BnTPS4	BnaC05g27860D	393	other
BnTPS4	BnaC08g23150D	393	other
BnTPS4	BnaC09g53220D	393	other
BnTPS4	BnaA02g35990D	250	other
BnTPS4	BnaA07g21750D	250	other
BnTPS4	BnaC06g22470D	250	other
BnTPS4	BnaCnng08010D	250	other
BnTPS4	BnaA08g08070D	259	other
BnTPS4	BnaA09g25420D	259	other
BnTPS4	BnaC08g09320D	259	other
BnTPS4	BnaCnng10940D	259	other
BnTPS4	BnaA05g01190D	170	other
BnTPS4	BnaC04g00750D	170	other
BnTPS4	BnaC04g50970D	170	other
BnTPS4	BnaA04g26930D	181	other
BnTPS4	BnaA05g00720D	181	other
BnTPS4	BnaC04g00330D	181	other
BnTPS4	BnaC04g51460D	181	other
BnTPS4	BnaA06g17970D	221	other
BnTPS4	BnaC03g56000D	221	other
BnTPS4	BnaA01g32620D	233	other
BnTPS4	BnaA03g29650D	233	other
BnTPS4	BnaC03g34880D	233	other
BnTPS4	BnaA04g17670D	600	other
BnTPS4	BnaC04g41310D	600	other
BnTPS4	BnaA01g33660D	157	other
BnTPS4	BnaA05g33200D	157	other
BnTPS4	BnaC01g40210D	157	other
BnTPS4	BnaC05g47450D	157	other
BnTPS4	BnaA01g28870D	162	other
BnTPS4	BnaA03g33870D	162	other
BnTPS4	BnaA05g24150D	162	other
BnTPS4	BnaC03g39110D	162	other
BnTPS4	BnaC03g39120D	162	other
BnTPS4	BnaC05g38190D	162	other
BnTPS4	BnaA04g12270D	702	other
BnTPS4	BnaA09g05340D	702	other
BnTPS4	BnaC04g33380D	702	other
BnTPS4	BnaUnng03050D	702	other
BnTPS4	BnaA06g29500D	217	other
BnTPS4	BnaA09g03330D	217	other
BnTPS4	BnaC07g27220D	217	other
BnTPS4	BnaA04g04810D	191	other
BnTPS4	BnaA09g33680D	191	other
BnTPS4	BnaC04g27330D	191	other
BnTPS4	BnaCnng31010D	191	other
BnTPS4	BnaCnng72870D	379	other
BnTPS4	BnaA09g00490D	238	other
BnTPS4	BnaCnng01190D	238	other
BnTPS4	BnaA01g00240D	204	other
BnTPS4	BnaA08g15820D	204	other
BnTPS4	BnaC01g01180D	204	other
BnTPS4	BnaC03g61220D	204	other
BnTPS4	BnaA03g23880D	350	other
BnTPS4	BnaAnng16650D	350	other
BnTPS4	BnaC03g28400D	350	other
BnTPS4	BnaC08g03780D	350	other
BnTPS4	BnaC08g03790D	350	other
BnTPS4	BnaC08g03940D	350	other
BnTPS4	BnaCnng67200D	350	other
BnTPS4	BnaA09g51390D	228	other
BnTPS4	BnaA10g01010D	228	other
BnTPS4	BnaC05g01120D	228	other
BnTPS4	BnaA06g14520D	259	other
BnTPS4	BnaA07g11360D	259	other
BnTPS4	BnaC05g15990D	259	other
BnTPS4	BnaC07g15270D	259	other
BnTPS4	BnaA04g01910D	228	other
BnTPS4	BnaA07g17940D	228	other
BnTPS4	BnaA09g55140D	228	other
BnTPS4	BnaA09g55150D	228	other
BnTPS4	BnaC04g23500D	228	other
BnTPS4	BnaC06g16700D	228	other
BnTPS4	BnaC08g29320D	228	other
BnTPS4	BnaA09g38080D	300	other
BnTPS4	BnaC08g30060D	300	other
BnTPS4	BnaA05g08890D	245	other
BnTPS4	BnaC04g10300D	245	other
BnTPS4	BnaA04g12690D	803	other
BnTPS4	BnaCnng42030D	803	other
BnTPS4	BnaA04g08730D	153	other
BnTPS4	BnaC03g73180D	153	other
BnTPS4	BnaC04g31000D	153	other
BnTPS4	BnaC07g30900D	153	other
BnTPS4	BnaA02g20180D	155	other
BnTPS4	BnaAnng25170D	155	other
BnTPS4	BnaCnng23910D	155	other
BnTPS4	BnaA03g16550D	204	other
BnTPS4	BnaAnng07590D	204	other
BnTPS4	BnaC03g19970D	204	other
BnTPS4	BnaA02g15180D	342	other
BnTPS4	BnaA07g28910D	342	other
BnTPS4	BnaC02g20320D	342	other
BnTPS4	BnaC02g20330D	342	other
BnTPS4	BnaC06g31970D	342	other
BnTPS4	BnaA05g15840D	406	other
BnTPS4	BnaA06g02800D	406	other
BnTPS4	BnaA08g02130D	406	other
BnTPS4	BnaC01g21580D	406	other
BnTPS4	BnaC03g68660D	406	other
BnTPS4	BnaC05g26650D	406	other
BnTPS4	BnaC06g03640D	406	other
BnTPS4	BnaC06g03650D	406	other
BnTPS4	BnaC07g12240D	406	other
BnTPS4	BnaCnng58160D	406	other
BnTPS4	BnaA05g27980D	166	other
BnTPS4	BnaC05g42210D	166	other
BnTPS4	BnaA01g06610D	600	other
BnTPS4	BnaA03g50170D	600	other
BnTPS4	BnaC04g08650D	600	other
BnTPS4	BnaC07g42640D	600	other
BnTPS4	BnaCnng70410D	600	other
BnTPS4	BnaA01g12320D	907	other
BnTPS4	BnaA03g45430D	907	other
BnTPS4	BnaA03g45450D	907	other
BnTPS4	BnaC01g14030D	907	other
BnTPS4	BnaC07g37350D	907	other
BnTPS4	BnaC07g37370D	907	other
BnTPS4	BnaAnng37880D	182	other
BnTPS4	BnaC04g31100D	182	other
BnTPS4	BnaA06g05150D	198	other
BnTPS4	BnaA09g48720D	198	other
BnTPS4	BnaC05g06430D	198	other
BnTPS4	BnaC08g42970D	198	other
BnTPS4	BnaA03g44280D	163	other
BnTPS4	BnaA03g44310D	163	other
BnTPS4	BnaC07g36070D	163	other
BnTPS4	BnaA08g13280D	162	other
BnTPS4	BnaAnng35020D	162	other
BnTPS4	BnaAnng26190D	162	other
BnTPS4	BnaC01g08460D	162	other
BnTPS4	BnaC03g68200D	162	other
BnTPS4	BnaC04g13460D	162	other
BnTPS4	BnaC06g03940D	162	other
BnTPS4	BnaC06g18760D	162	other
BnTPS4	BnaC07g42230D	162	other
BnTPS4	BnaA10g03820D	635	other
BnTPS4	BnaC05g03730D	635	other
BnTPS4	BnaA03g12920D	167	other
BnTPS4	BnaA10g07650D	167	other
BnTPS4	BnaC03g15750D	167	other
BnTPS4	BnaC08g01440D	167	other
BnTPS4	BnaC08g01450D	167	other
BnTPS4	BnaC08g01460D	167	other
BnTPS4	BnaCnng32750D	167	other
BnTPS4	BnaA03g53180D	259	other
BnTPS4	BnaA08g10870D	259	other
BnTPS4	BnaAnng11640D	259	other
BnTPS4	BnaC01g03420D	259	other
BnTPS4	BnaC03g65530D	259	other
BnTPS4	BnaC04g21590D	259	other
BnTPS4	BnaC07g15160D	259	other
BnTPS4	BnaC07g45360D	259	other
BnTPS4	BnaA04g05320D	275	other
BnTPS4	BnaC04g28060D	275	other
BnTPS4	BnaA06g04850D	179	other
BnTPS4	BnaA08g26980D	179	other
BnTPS4	BnaA09g48900D	179	other
BnTPS4	BnaC08g13460D	179	other
BnTPS4	BnaC08g43180D	179	other
BnTPS4	BnaA03g02940D	329	other
BnTPS4	BnaC03g04340D	329	other
BnTPS4	BnaC06g25970D	329	other
BnTPS4	BnaA04g12070D	161	other
BnTPS4	BnaA09g43270D	161	other
BnTPS4	BnaC04g33630D	161	other
BnTPS4	BnaC08g35890D	161	other
BnTPS4	BnaA02g07440D	169	other
BnTPS4	BnaC02g10510D	169	other
BnTPS4	BnaA06g40730D	734	other
BnTPS4	BnaC07g47330D	734	other
BnTPS4	BnaA10g26450D	373	other
BnTPS4	BnaCnng02680D	373	other
BnTPS4	BnaA01g12640D	641	other
BnTPS4	BnaA09g27810D	641	other
BnTPS4	BnaC03g58050D	641	other
BnTPS4	BnaC05g21440D	641	other
BnTPS4	BnaA01g24900D	226	other
BnTPS4	BnaA06g07780D	226	other
BnTPS4	BnaA09g46770D	226	other
BnTPS4	BnaC08g06410D	226	other
BnTPS4	BnaC08g40840D	226	other
BnTPS4	BnaCnng69170D	226	other
BnTPS4	BnaCnng69180D	226	other
BnTPS4	BnaCnng47790D	226	other
BnTPS4	BnaCnng47800D	226	other
BnTPS4	BnaA04g15110D	154	other
BnTPS4	BnaC04g38040D	154	other
BnTPS4	BnaA02g34580D	920	other
BnTPS4	BnaA06g24090D	920	other
BnTPS4	BnaC03g49150D	920	other
BnTPS4	BnaC09g25400D	920	other
BnTPS4	BnaA03g17020D	191	other
BnTPS4	BnaA03g17030D	191	other
BnTPS4	BnaA05g07290D	191	other
BnTPS4	BnaA05g07300D	191	other
BnTPS4	BnaC03g20550D	191	other
BnTPS4	BnaC03g72010D	191	other
BnTPS4	BnaC04g08090D	191	other
BnTPS4	BnaC04g08100D	191	other
BnTPS4	BnaA07g32800D	169	other
BnTPS4	BnaC06g37280D	169	other
BnTPS4	BnaA06g14510D	259	other
BnTPS4	BnaA07g11370D	259	other
BnTPS4	BnaA08g21730D	259	other
BnTPS4	BnaC05g15970D	259	other
BnTPS4	BnaC07g15280D	259	other
BnTPS4	BnaC08g19360D	259	other
BnTPS4	BnaA06g05870D	153	other
BnTPS4	BnaA08g26060D	153	other
BnTPS4	BnaA09g57170D	153	other
BnTPS4	BnaC03g53000D	153	other
BnTPS4	BnaC05g07420D	153	other
BnTPS4	BnaC08g42490D	153	other
BnTPS4	BnaCnng51660D	153	other
BnTPS4	BnaA01g36280D	169	other
BnTPS4	BnaC01g29930D	169	other
BnTPS4	BnaC08g42000D	169	other
BnTPS4	BnaA08g27410D	468	other
BnTPS4	BnaA08g27420D	468	other
BnTPS4	BnaA10g01800D	468	other
BnTPS4	BnaC05g01880D	468	other
BnTPS4	BnaC08g00230D	468	other
BnTPS4	BnaA05g07860D	304	other
BnTPS4	BnaAnng07370D	304	other
BnTPS4	BnaC04g08890D	304	other
BnTPS4	BnaA01g32300D	276	other
BnTPS4	BnaA05g29500D	276	other
BnTPS4	BnaC01g39350D	276	other
BnTPS4	BnaC05g43850D	276	other
BnTPS4	BnaA07g00650D	371	other
BnTPS4	BnaC07g00870D	371	other
BnTPS4	BnaC07g01640D	371	other
BnTPS4	BnaA01g33020D	600	other
BnTPS4	BnaA03g27840D	600	other
BnTPS4	BnaC03g32890D	600	other
BnTPS4	BnaA02g00920D	435	other
BnTPS4	BnaA10g21200D	435	other
BnTPS4	BnaC09g45380D	435	other
BnTPS4	BnaCnng20200D	435	other
BnTPS4	BnaAnng22640D	173	other
BnTPS4	BnaAnng24130D	173	other
BnTPS4	BnaCnng24720D	173	other
BnTPS4	BnaA02g09920D	163	other
BnTPS4	BnaA03g12090D	163	other
BnTPS4	BnaA06g36810D	153	other
BnTPS4	BnaC07g16980D	153	other
BnTPS4	BnaA06g25230D	463	other
BnTPS4	BnaC03g48410D	463	other
BnTPS4	BnaA10g19180D	272	other
BnTPS4	BnaC09g42880D	272	other
BnTPS4	BnaA06g36370D	173	other
BnTPS4	BnaC02g30750D	173	other
BnTPS4	BnaC07g17610D	173	other
BnTPS4	BnaA03g39650D	424	other
BnTPS4	BnaC01g24130D	424	other
BnTPS4	BnaCnng40790D	424	other
BnTPS4	BnaA01g34430D	811	other
BnTPS4	BnaA05g32480D	811	other
BnTPS4	BnaAnng25620D	811	other
BnTPS4	BnaCnng53900D	811	other
BnTPS4	BnaCnng18460D	811	other
BnTPS4	BnaA02g21470D	600	other
BnTPS4	BnaA09g21060D	600	other
BnTPS4	BnaC02g28500D	600	other
BnTPS4	BnaC09g23320D	600	other
BnTPS4	BnaA09g00710D	668	other
BnTPS4	BnaCnng23260D	668	other
BnTPS4	BnaA02g12430D	185	other
BnTPS4	BnaCnng23850D	185	other
BnTPS4	BnaA05g25610D	240	other
BnTPS4	BnaC05g39510D	240	other
BnTPS4	BnaA06g24330D	329	other
BnTPS4	BnaC03g48940D	329	other
BnTPS4	BnaA06g25700D	215	other
BnTPS4	BnaA06g25710D	215	other
BnTPS4	BnaA09g09210D	215	other
BnTPS4	BnaC09g09440D	215	other
BnTPS4	BnaA04g16720D	158	other
BnTPS4	BnaC04g40080D	158	other
BnTPS4	BnTPS9	660	inter
BnTPS4	BnTPS19	660	inter
BnTPS4	BnaA01g01080D	169	other
BnTPS4	BnaAnng18230D	169	other
BnTPS4	BnaC01g02100D	169	other
BnTPS4	BnaC07g46240D	169	other
BnTPS4	BnaA05g29880D	166	other
BnTPS4	BnaC01g39690D	166	other
BnTPS4	BnaC05g44190D	166	other
BnTPS4	BnaA09g16190D	334	other
BnTPS4	BnaC09g16980D	334	other
BnTPS4	BnaC09g16990D	334	other
BnTPS4	BnaA01g34710D	156	other
BnTPS4	BnaC01g00680D	156	other
BnTPS4	BnaC09g46450D	156	other
BnTPS4	BnaC09g13360D	324	other
BnTPS4	BnaA02g18730D	813	other
BnTPS4	BnaA02g18740D	813	other
BnTPS4	BnaA07g33960D	813	other
BnTPS4	BnaC02g24780D	813	other
BnTPS4	BnaC06g38600D	813	other
BnTPS4	BnaA02g29830D	402	other
BnTPS4	BnaA06g30890D	402	other
BnTPS4	BnaC02g37910D	402	other
BnTPS4	BnaC06g30220D	402	other
BnTPS4	BnaC06g30230D	402	other
BnTPS4	BnaC07g25770D	402	other
BnTPS4	BnaA03g27130D	161	other
BnTPS4	BnaA09g51960D	161	other
BnTPS4	BnaA10g00360D	161	other
BnTPS4	BnaC03g32130D	161	other
BnTPS4	BnaC05g00440D	161	other
BnTPS4	BnaCnng08780D	161	other
BnTPS4	BnaCnng02360D	161	other
BnTPS4	BnaA04g12940D	187	other
BnTPS4	BnaA09g42570D	187	other
BnTPS4	BnaC04g34990D	187	other
BnTPS4	BnaC08g35030D	187	other
BnTPS4	BnaA01g28120D	174	other
BnTPS4	BnaA03g34110D	174	other
BnTPS4	BnaA05g23460D	174	other
BnTPS4	BnaC01g44580D	174	other
BnTPS4	BnaC03g39560D	174	other
BnTPS4	BnaC05g37160D	174	other
BnTPS4	BnaC06g05270D	174	other
BnTPS4	BnaA02g08820D	166	other
BnTPS4	BnaA03g11100D	166	other
BnTPS4	BnaA03g11140D	166	other
BnTPS4	BnaC02g12690D	166	other
BnTPS4	BnaC02g13140D	166	other
BnTPS4	BnaC03g13470D	166	other
BnTPS4	BnaC03g13870D	166	other
BnTPS4	BnaC05g24360D	166	other
BnTPS4	BnaA07g32310D	157	other
BnTPS4	BnaC06g36760D	157	other
BnTPS4	BnaCnng28360D	157	other
BnTPS4	BnaA03g40360D	245	other
BnTPS4	BnaC07g31330D	245	other
BnTPS4	BnaA09g36810D	221	other
BnTPS4	BnaC04g55490D	221	other
BnTPS4	BnaC08g28500D	221	other
BnTPS4	BnaCnng07360D	221	other
BnTPS4	BnaA02g09580D	169	other
BnTPS4	BnaA03g11850D	169	other
BnTPS4	BnaA04g13300D	169	other
BnTPS4	BnaA10g08330D	169	other
BnTPS4	BnaA10g28860D	169	other
BnTPS4	BnaA10g28340D	169	other
BnTPS4	BnaC02g44190D	169	other
BnTPS4	BnaC03g14590D	169	other
BnTPS4	BnaCnng78280D	169	other
BnTPS4	BnaCnng38420D	169	other
BnTPS4	BnaCnng16580D	169	other
BnTPS4	BnaUnng03800D	169	other
BnTPS4	BnaA03g17490D	154	other
BnTPS4	BnaC03g20930D	154	other
BnTPS4	BnaAnng18570D	600	other
BnTPS4	BnaA01g19540D	155	other
BnTPS4	BnaA03g41270D	155	other
BnTPS4	BnaA09g31840D	155	other
BnTPS4	BnaC01g42420D	155	other
BnTPS4	BnaC07g32160D	155	other
BnTPS4	BnaC08g22670D	155	other
BnTPS4	BnaA02g23650D	163	other
BnTPS4	BnaC02g31320D	163	other
BnTPS4	BnaA04g10460D	231	other
BnTPS4	BnaA07g15060D	231	other
BnTPS4	BnaC04g32730D	231	other
BnTPS4	BnaC06g42250D	231	other
BnTPS4	BnaA02g26380D	169	other
BnTPS4	BnaC02g34490D	169	other
BnTPS4	BnaA10g28400D	166	other
BnTPS4	BnaA10g28410D	166	other
BnTPS4	BnaC09g28660D	166	other
BnTPS4	BnaA01g11800D	154	other
BnTPS4	BnaC01g13370D	154	other
BnTPS4	BnaAnng38950D	697	other
BnTPS4	BnaC05g28320D	697	other
BnTPS4	BnaC05g28330D	697	other
BnTPS4	BnaA10g00460D	157	other
BnTPS4	BnaC05g00520D	157	other
BnTPS4	BnaCnng08700D	157	other
BnTPS4	BnaA07g11960D	189	other
BnTPS4	BnaC07g16060D	189	other
BnTPS4	BnaAnng39350D	232	other
BnTPS4	BnaC02g44430D	232	other
BnTPS4	BnaA03g19240D	295	other
BnTPS4	BnaA05g01890D	295	other
BnTPS4	BnaC04g01600D	295	other
BnTPS4	BnaC07g33260D	295	other
BnTPS4	BnaA02g29700D	457	other
BnTPS4	BnaA02g29720D	457	other
BnTPS4	BnaA06g31030D	457	other
BnTPS4	BnaC02g37730D	457	other
BnTPS4	BnaC07g25610D	457	other
BnTPS4	BnaA05g13850D	457	other
BnTPS4	BnaA06g00420D	457	other
BnTPS4	BnaAnng35590D	457	other
BnTPS4	BnaC06g07180D	457	other
BnTPS4	BnaA09g25320D	158	other
BnTPS4	BnaCnng21170D	158	other
BnTPS4	BnaA10g15860D	155	other
BnTPS4	BnaC09g54290D	155	other
BnTPS4	BnTPS1	665	other
BnTPS4	BnTPS6	665	inter
BnTPS4	BnTPS14	665	inter
BnTPS4	BnTPS26	665	inter
BnTPS4	BnaA09g51590D	297	other
BnTPS4	BnaC02g27930D	297	other
BnTPS4	BnaCnng01570D	297	other
BnTPS4	BnaA04g25770D	232	other
BnTPS4	BnaC04g49680D	232	other
BnTPS4	BnaA06g35980D	245	other
[truncated: 33,751 more rows]

## Sheet: Table S5
Table S5. The GO enrichment analysis results.
GO_class	ID	Description	GeneRatio	BgRatio	pvalue	p.adjust	qvalue	geneID	Count
biological_process	GO:0034219	carbohydrate transmembrane transport	141/5096	309/76374	5.28495e-81	7.48349e-78	3.88305e-78	BnaA01g01140D/BnaA01g02100D/BnaA01g19370D/BnaA01g21370D/BnaA01g26430D/BnaA01g36640D/BnaA01g36650D/BnaA01g36660D/BnaA01g36670D/BnaA01g36680D/BnaA02g15620D/BnaA02g18110D/BnaA02g21050D/BnaA02g26600D/BnaA02g35880D/BnaA03g18250D/BnaA03g25570D/BnaA03g29290D/BnaA03g29310D/BnaA03g35470D/BnaA03g35480D/BnaA03g35490D/BnaA03g40290D/BnaA03g53530D/BnaA04g02410D/BnaA04g21000D/BnaA04g21790D/BnaA04g22280D/BnaA04g…	141
biological_process	GO:0005992	trehalose biosynthetic process	71/5096	85/76374	3.14056e-69	2.22352e-66	1.15374e-66	BnaA01g08660D/BnaA01g12320D/BnaA01g22200D/BnaA02g11230D/BnaA02g14790D/BnaA02g18730D/BnaA02g18740D/BnaA02g18920D/BnaA02g18930D/BnaA02g34580D/BnaA03g22980D/BnaA03g24650D/BnaA03g25110D/BnaA03g43320D/BnaA03g45430D/BnaA03g45450D/BnaA03g48650D/BnaA03g54540D/BnaA04g12690D/BnaA06g11450D/BnaA06g11460D/BnaA06g24090D/BnaA06g37150D/BnaA07g24830D/BnaA07g33960D/BnaA07g34230D/BnaA08g16230D/BnaA08g20280D/BnaA08g…	71
molecular_function	GO:0004805	trehalose-phosphatase activity	53/5096	55/76374	4.90375e-60	1.74808e-57	9.0705e-58	BnaA01g08660D/BnaA01g12320D/BnaA01g22200D/BnaA02g11230D/BnaA02g14790D/BnaA02g18730D/BnaA02g18740D/BnaA02g34580D/BnaA03g22980D/BnaA03g24650D/BnaA03g25110D/BnaA03g43320D/BnaA03g45430D/BnaA03g45450D/BnaA03g54540D/BnaA04g12690D/BnaA06g24090D/BnaA06g37150D/BnaA07g24830D/BnaA07g33960D/BnaA08g16230D/BnaA08g20280D/BnaA08g28610D/BnaA09g09720D/BnaA10g07960D/BnaAnng04500D/BnaAnng13570D/BnaAnng22210D/BnaAnng…	53
molecular_function	GO:0005351	carbohydrate:proton symporter activity	128/5096	349/76374	4.93809e-60	1.74808e-57	9.0705e-58	BnaA01g01140D/BnaA01g02100D/BnaA01g19370D/BnaA01g21370D/BnaA01g26430D/BnaA01g36650D/BnaA01g36660D/BnaA01g36670D/BnaA01g36680D/BnaA02g18110D/BnaA02g21050D/BnaA02g35880D/BnaA03g18250D/BnaA03g25570D/BnaA03g29290D/BnaA03g29310D/BnaA03g35470D/BnaA03g40290D/BnaA03g53530D/BnaA03g54300D/BnaA04g01650D/BnaA04g02410D/BnaA04g21000D/BnaA04g21010D/BnaA04g21790D/BnaA04g22280D/BnaA04g25030D/BnaA05g03260D/BnaA05g…	128
molecular_function	GO:0047262	polygalacturonate 4-alpha-galacturonosyltransferase activity	64/5096	107/76374	3.49692e-47	9.90327e-45	5.13863e-45	BnaA01g33020D/BnaA02g02630D/BnaA02g28840D/BnaA03g05430D/BnaA03g17980D/BnaA03g27840D/BnaA03g37710D/BnaA04g00880D/BnaA04g17670D/BnaA04g22110D/BnaA05g01360D/BnaA05g06410D/BnaA05g27020D/BnaA06g12710D/BnaA06g31630D/BnaA06g40930D/BnaA07g04020D/BnaA07g05040D/BnaA07g18060D/BnaA08g22570D/BnaA09g02250D/BnaA09g38850D/BnaA09g49760D/BnaA09g55340D/BnaA09g56080D/BnaA10g18710D/BnaA10g27900D/BnaAnng24090D/BnaC02g…	64
molecular_function	GO:0004747	ribokinase activity	41/5096	48/76374	2.47817e-41	5.01299e-39	2.60115e-39	BnaA01g19820D/BnaA03g13000D/BnaA03g14420D/BnaA03g24290D/BnaA04g01640D/BnaA04g18320D/BnaA05g11350D/BnaA05g12970D/BnaA07g18380D/BnaA07g25850D/BnaA08g28410D/BnaA09g37800D/BnaA09g37830D/BnaA09g45100D/BnaA09g45110D/BnaA10g03980D/BnaA10g07720D/BnaAnng30390D/BnaC02g13230D/BnaC02g13420D/BnaC03g15850D/BnaC03g17470D/BnaC03g28870D/BnaC03g60850D/BnaC04g22930D/BnaC04g23060D/BnaC04g35530D/BnaC04g42400D/BnaC05g…	41
biological_process	GO:0006014	D-ribose metabolic process	41/5096	48/76374	2.47817e-41	5.01299e-39	2.60115e-39	BnaA01g19820D/BnaA03g13000D/BnaA03g14420D/BnaA03g24290D/BnaA04g01640D/BnaA04g18320D/BnaA05g11350D/BnaA05g12970D/BnaA07g18380D/BnaA07g25850D/BnaA08g28410D/BnaA09g37800D/BnaA09g37830D/BnaA09g45100D/BnaA09g45110D/BnaA10g03980D/BnaA10g07720D/BnaAnng30390D/BnaC02g13230D/BnaC02g13420D/BnaC03g15850D/BnaC03g17470D/BnaC03g28870D/BnaC03g60850D/BnaC04g22930D/BnaC04g23060D/BnaC04g35530D/BnaC04g42400D/BnaC05g…	41
biological_process	GO:0005983	starch catabolic process	57/5096	98/76374	3.19547e-41	5.65599e-39	2.93479e-39	BnaA01g17940D/BnaA02g08900D/BnaA03g11260D/BnaA03g18970D/BnaA03g19240D/BnaA03g23880D/BnaA03g37260D/BnaA03g42940D/BnaA04g05650D/BnaA05g01890D/BnaA05g10520D/BnaA05g27980D/BnaA05g36350D/BnaA07g05790D/BnaA07g28350D/BnaA08g00480D/BnaA08g05660D/BnaA08g08230D/BnaA08g25580D/BnaA08g29810D/BnaA09g32630D/BnaA09g32650D/BnaA09g47750D/BnaA10g25820D/BnaAnng16650D/BnaAnng25950D/BnaAnng41430D/BnaC01g21190D/BnaC02g…	57
molecular_function	GO:0003825	alpha,alpha-trehalose-phosphate synthase (UDP-forming) activity	36/5096	38/76374	2.58844e-40	4.07248e-38	2.11314e-38	BnaA01g08660D/BnaA01g22200D/BnaA02g14790D/BnaA02g18920D/BnaA02g18930D/BnaA03g22980D/BnaA03g24650D/BnaA03g43320D/BnaA03g48650D/BnaA03g54540D/BnaA06g11450D/BnaA06g11460D/BnaA07g24830D/BnaA07g34230D/BnaA08g20280D/BnaA08g28610D/BnaA09g09720D/BnaAnng13570D/BnaC01g43070D/BnaC02g19750D/BnaC02g25020D/BnaC02g29600D/BnaC03g27100D/BnaC04g31780D/BnaC05g13090D/BnaC05g13110D/BnaC06g26160D/BnaC06g39000D/BnaC07g…	36
molecular_function	GO:0008506	sucrose:proton symporter activity	31/5096	33/76374	1.5159e-34	2.14652e-32	1.11379e-32	BnaA01g36640D/BnaA02g15620D/BnaA02g26600D/BnaA03g01930D/BnaA03g35480D/BnaA03g35490D/BnaA03g52810D/BnaA05g19250D/BnaA06g05900D/BnaA06g33960D/BnaA07g10320D/BnaA07g23350D/BnaA07g29680D/BnaA09g30430D/BnaA09g57200D/BnaC01g28090D/BnaC01g32940D/BnaC02g20830D/BnaC02g34840D/BnaC03g02450D/BnaC03g41250D/BnaC03g41260D/BnaC05g17970D/BnaC05g32770D/BnaC05g49240D/BnaC06g32880D/BnaC07g13570D/BnaC07g21980D/BnaC08g…	31
molecular_function	GO:0000287	magnesium ion binding	107/5096	427/76374	2.96334e-33	3.81463e-31	1.97934e-31	BnaA01g20680D/BnaA02g12320D/BnaA02g27550D/BnaA03g02560D/BnaA03g04970D/BnaA03g22980D/BnaA03g24650D/BnaA03g26050D/BnaA03g33430D/BnaA03g33440D/BnaA03g33460D/BnaA03g59500D/BnaA03g59510D/BnaA03g60000D/BnaA04g05070D/BnaA04g25770D/BnaA05g08630D/BnaA05g35800D/BnaA06g22820D/BnaA06g26510D/BnaA06g33330D/BnaA06g33340D/BnaA06g33360D/BnaA06g33510D/BnaA07g01950D/BnaA07g15940D/BnaA07g17800D/BnaA07g25510D/BnaA07g…	107
biological_process	GO:0080027	response to herbivore	40/5096	62/76374	6.4058e-32	7.55884e-30	3.92215e-30	BnaA01g22200D/BnaA03g22980D/BnaA03g24650D/BnaA03g48650D/BnaA03g54540D/BnaA03g59500D/BnaA03g59510D/BnaA03g60000D/BnaA06g26510D/BnaA08g00480D/BnaA08g05660D/BnaA08g30380D/BnaA09g13870D/BnaAnng04260D/BnaAnng04280D/BnaAnng13440D/BnaAnng28010D/BnaAnng40250D/BnaC01g41830D/BnaC01g43070D/BnaC02g13490D/BnaC02g19300D/BnaC03g27100D/BnaC03g78310D/BnaC03g78320D/BnaC07g16660D/BnaC07g30440D/BnaC07g30450D/BnaC07g…	40
molecular_function	GO:0004356	glutamate-ammonia ligase activity	27/5096	28/76374	4.4271e-31	4.47769e-29	2.32339e-29	BnaA02g03140D/BnaA02g12430D/BnaA03g34780D/BnaA04g07450D/BnaA04g08160D/BnaA05g22420D/BnaA06g03770D/BnaA07g15990D/BnaA08g29950D/BnaA09g27570D/BnaA09g27970D/BnaA09g33460D/BnaA10g17910D/BnaAnng27730D/BnaC02g06690D/BnaC03g40250D/BnaC04g29670D/BnaC04g30250D/BnaC05g35690D/BnaC05g39460D/BnaC06g02010D/BnaC06g14440D/BnaC08g07930D/BnaC08g24280D/BnaC09g41340D/BnaCnng23850D/BnaCnng57900D	27
biological_process	GO:0006542	glutamine biosynthetic process	27/5096	28/76374	4.4271e-31	4.47769e-29	2.32339e-29	BnaA02g03140D/BnaA02g12430D/BnaA03g34780D/BnaA04g07450D/BnaA04g08160D/BnaA05g22420D/BnaA06g03770D/BnaA07g15990D/BnaA08g29950D/BnaA09g27570D/BnaA09g27970D/BnaA09g33460D/BnaA10g17910D/BnaAnng27730D/BnaC02g06690D/BnaC03g40250D/BnaC04g29670D/BnaC04g30250D/BnaC05g35690D/BnaC05g39460D/BnaC06g02010D/BnaC06g14440D/BnaC08g07930D/BnaC08g24280D/BnaC09g41340D/BnaCnng23850D/BnaCnng57900D	27
biological_process	GO:0005978	glycogen biosynthetic process	25/5096	25/76374	3.82997e-30	3.61549e-28	1.87601e-28	BnaA01g12640D/BnaA04g12270D/BnaA05g07860D/BnaA06g30310D/BnaA06g40730D/BnaA07g04740D/BnaA09g05340D/BnaA09g27810D/BnaA10g03820D/BnaA10g15850D/BnaA10g26450D/BnaAnng07370D/BnaAnng08760D/BnaC02g08620D/BnaC03g58050D/BnaC04g08890D/BnaC04g33380D/BnaC05g03730D/BnaC05g21440D/BnaC07g47330D/BnaC09g54280D/BnaCnng00430D/BnaCnng02680D/BnaCnng59960D/BnaUnng03050D	25
biological_process	GO:0009749	response to glucose	95/5096	383/76374	2.53538e-29	2.24381e-27	1.16427e-27	BnaA01g30320D/BnaA01g36280D/BnaA02g03140D/BnaA02g04270D/BnaA02g08340D/BnaA02g12430D/BnaA03g07620D/BnaA03g07630D/BnaA03g08110D/BnaA03g10430D/BnaA03g14420D/BnaA03g15610D/BnaA03g18970D/BnaA03g32440D/BnaA03g34780D/BnaA04g01640D/BnaA04g07450D/BnaA04g08160D/BnaA04g09140D/BnaA04g18320D/BnaA05g09830D/BnaA05g11350D/BnaA05g22420D/BnaA05g29640D/BnaA06g03770D/BnaA06g17510D/BnaA06g20540D/BnaA06g30860D/BnaA07g…	95
biological_process	GO:0016106	sesquiterpenoid biosynthetic process	24/5096	24/76374	5.76534e-29	4.5354e-27	2.35334e-27	BnaA02g22750D/BnaA03g59500D/BnaA03g59510D/BnaA04g09360D/BnaA06g26510D/BnaA08g30380D/BnaAnng04260D/BnaAnng04280D/BnaAnng13440D/BnaAnng28010D/BnaAnng36420D/BnaAnng40250D/BnaC01g41830D/BnaC02g13490D/BnaC02g19300D/BnaC02g31080D/BnaC07g16660D/BnaC07g18170D/BnaC07g30440D/BnaC07g30450D/BnaC08g48040D/BnaCnng27320D/BnaCnng41750D/BnaCnng74840D	24
molecular_function	GO:0034768	(E)-beta-ocimene synthase activity	24/5096	24/76374	5.76534e-29	4.5354e-27	2.35334e-27	BnaA01g22200D/BnaA03g22980D/BnaA03g24650D/BnaA03g54540D/BnaA06g33330D/BnaA06g33340D/BnaA06g33360D/BnaA08g30380D/BnaAnng13430D/BnaAnng13440D/BnaAnng28010D/BnaAnng40250D/BnaC01g41830D/BnaC01g43070D/BnaC02g34460D/BnaC02g34480D/BnaC03g27100D/BnaC07g22980D/BnaC07g23000D/BnaC08g34130D/BnaC08g48040D/BnaCnng41250D/BnaCnng52840D/BnaCnng60530D	24
molecular_function	GO:0004556	alpha-amylase activity	23/5096	23/76374	8.67711e-28	6.14339e-26	3.1877e-26	BnaA01g19130D/BnaA03g23880D/BnaA05g05660D/BnaA05g36120D/BnaA05g36350D/BnaA07g28350D/BnaA07g32360D/BnaA08g27410D/BnaA08g27420D/BnaA10g01800D/BnaA10g25820D/BnaC01g16860D/BnaC01g22960D/BnaC03g28400D/BnaC04g05440D/BnaC05g01880D/BnaC05g31620D/BnaC06g30880D/BnaC06g36810D/BnaC08g00230D/BnaC08g03940D/BnaCnng20610D/BnaCnng67200D	23
molecular_function	GO:0008865	fructokinase activity	23/5096	23/76374	8.67711e-28	6.14339e-26	3.1877e-26	BnaA01g00240D/BnaA05g15840D/BnaA05g19110D/BnaA06g02800D/BnaA07g00920D/BnaA08g02130D/BnaA08g15820D/BnaA09g10080D/BnaA10g05030D/BnaC01g01180D/BnaC01g21580D/BnaC03g61220D/BnaC03g68660D/BnaC05g26650D/BnaC05g32490D/BnaC06g01220D/BnaC06g03640D/BnaC06g03650D/BnaC07g01200D/BnaC07g12240D/BnaC08g36510D/BnaC09g10170D/BnaCnng58160D	23
biological_process	GO:0035435	phosphate ion transmembrane transport	32/5096	47/76374	6.03385e-27	4.06854e-25	2.11109e-25	BnaA02g18110D/BnaA03g15270D/BnaA03g18250D/BnaA03g35470D/BnaA04g21000D/BnaA04g22280D/BnaA05g06200D/BnaA05g06210D/BnaA05g06230D/BnaA06g14710D/BnaA07g21370D/BnaA07g32730D/BnaA07g32740D/BnaA07g32750D/BnaA08g21590D/BnaC03g18410D/BnaC03g72240D/BnaC04g06470D/BnaC04g06480D/BnaC04g44990D/BnaC04g46050D/BnaC05g16100D/BnaC05g16110D/BnaC05g16120D/BnaC06g21850D/BnaC06g37180D/BnaC06g37190D/BnaC06g37200D/BnaC06g…	32
molecular_function	GO:0016762	xyloglucan:xyloglucosyl transferase activity	43/5096	92/76374	3.01502e-26	1.94058e-24	1.00693e-24	BnaA01g06730D/BnaA01g06740D/BnaA01g06750D/BnaA01g15000D/BnaA02g22470D/BnaA02g26000D/BnaA02g35250D/BnaA02g35260D/BnaA02g35330D/BnaA03g10220D/BnaA03g50050D/BnaA03g50060D/BnaA03g50070D/BnaA05g16360D/BnaA06g18630D/BnaA06g34490D/BnaA08g06970D/BnaA08g13110D/BnaA10g11500D/BnaA10g29060D/BnaA10g29070D/BnaAnng03530D/BnaAnng23050D/BnaAnng31590D/BnaAnng35740D/BnaC01g08120D/BnaC01g08130D/BnaC01g17710D/BnaC02g…	43
biological_process	GO:0019375	galactolipid biosynthetic process	100/5096	463/76374	1.05491e-25	6.49457e-24	3.36992e-24	BnaA01g05080D/BnaA01g17560D/BnaA01g27470D/BnaA02g09470D/BnaA02g16360D/BnaA02g16660D/BnaA02g21470D/BnaA02g23460D/BnaA02g27970D/BnaA02g35770D/BnaA03g03230D/BnaA03g04160D/BnaA03g08110D/BnaA03g11720D/BnaA03g26890D/BnaA03g51720D/BnaA04g06610D/BnaA04g26270D/BnaA05g12940D/BnaA05g23660D/BnaA06g27590D/BnaA06g29670D/BnaA07g07410D/BnaA07g22680D/BnaA07g24020D/BnaA07g28470D/BnaA07g30830D/BnaA07g31170D/BnaA07g…	100
molecular_function	GO:0016760	cellulose synthase (UDP-forming) activity	41/5096	86/76374	1.61083e-25	9.5039e-24	4.9314e-24	BnaA01g04600D/BnaA01g05450D/BnaA02g03580D/BnaA02g34360D/BnaA03g06610D/BnaA03g52020D/BnaA03g55200D/BnaA03g55860D/BnaA03g58390D/BnaA04g13710D/BnaA04g18860D/BnaA04g28830D/BnaA05g11750D/BnaA05g28060D/BnaA06g23700D/BnaA06g36370D/BnaA08g16590D/BnaA09g06990D/BnaA10g01360D/BnaAnng01240D/BnaC01g00330D/BnaC01g06090D/BnaC02g02440D/BnaC02g30750D/BnaC02g43280D/BnaC02g44200D/BnaC02g44220D/BnaC02g44340D/BnaC03g…	41
molecular_function	GO:0042132	fructose 1,6-bisphosphate 1-phosphatase activity	21/5096	21/76374	1.96442e-25	1.11265e-23	5.77334e-24	BnaA04g03360D/BnaA04g04350D/BnaA05g10520D/BnaA07g16660D/BnaA08g29810D/BnaA09g35380D/BnaAnng15110D/BnaAnng17190D/BnaAnng17200D/BnaC03g25780D/BnaC03g28890D/BnaC03g49790D/BnaC03g76750D/BnaC04g11560D/BnaC04g25260D/BnaC04g26530D/BnaC06g15060D/BnaC08g26740D/BnaC08g46760D/BnaC08g48810D/BnaCnng53590D	21
molecular_function	GO:0016161	beta-amylase activity	31/5096	48/76374	4.50117e-25	2.45141e-23	1.27199e-23	BnaA01g17940D/BnaA02g08900D/BnaA02g36650D/BnaA03g07240D/BnaA03g11260D/BnaA03g37260D/BnaA03g42940D/BnaA05g05170D/BnaA05g10780D/BnaA07g05790D/BnaA08g00480D/BnaA08g05660D/BnaA08g08230D/BnaA10g16290D/BnaC01g21190D/BnaC02g12830D/BnaC02g31510D/BnaC03g09200D/BnaC03g14120D/BnaC03g43570D/BnaC03g71580D/BnaC03g78310D/BnaC03g78320D/BnaC04g04570D/BnaC04g12480D/BnaC07g34180D/BnaC08g10900D/BnaC09g21440D/BnaC09g…	31
molecular_function	GO:0050662	coenzyme binding	67/5096	233/76374	4.80344e-25	2.51914e-23	1.30713e-23	BnaA01g06610D/BnaA01g13540D/BnaA01g23480D/BnaA02g02250D/BnaA02g21470D/BnaA02g26380D/BnaA03g37120D/BnaA03g50170D/BnaA03g56770D/BnaA04g01910D/BnaA04g19620D/BnaA05g09030D/BnaA05g13490D/BnaA06g12110D/BnaA06g12420D/BnaA06g38100D/BnaA07g06190D/BnaA07g17940D/BnaA07g27190D/BnaA07g32800D/BnaA08g24600D/BnaA09g10850D/BnaA09g21060D/BnaA09g22180D/BnaA09g25900D/BnaA09g28520D/BnaA09g28550D/BnaA09g48990D/BnaA09g…	67
biological_process	GO:0042128	nitrate assimilation	30/5096	45/76374	6.29962e-25	3.18581e-23	1.65306e-23	BnaA01g35090D/BnaA02g03140D/BnaA02g12430D/BnaA02g18610D/BnaA03g34780D/BnaA03g46410D/BnaA04g08160D/BnaA05g22420D/BnaA06g03770D/BnaA07g20840D/BnaA07g33680D/BnaA07g33690D/BnaA09g27570D/BnaA09g27970D/BnaA10g17910D/BnaAnng27730D/BnaC01g15850D/BnaC02g06690D/BnaC03g40250D/BnaC04g30250D/BnaC05g35690D/BnaC05g39460D/BnaC06g02010D/BnaC06g20690D/BnaC06g38300D/BnaC07g38670D/BnaC09g41340D/BnaCnng23850D/BnaCnng…	30
biological_process	GO:0005985	sucrose metabolic process	28/5096	39/76374	9.0738e-25	4.43052e-23	2.29891e-23	BnaA01g34430D/BnaA02g04800D/BnaA02g23460D/BnaA03g03230D/BnaA03g06500D/BnaA03g28980D/BnaA04g04350D/BnaA05g32480D/BnaA06g27590D/BnaA10g03060D/BnaAnng17190D/BnaAnng17200D/BnaAnng25620D/BnaC02g29300D/BnaC03g04660D/BnaC03g08320D/BnaC03g08340D/BnaC03g25780D/BnaC03g28890D/BnaC03g76750D/BnaC04g26530D/BnaC05g02930D/BnaC05g27770D/BnaC07g29460D/BnaC08g48810D/BnaCnng18460D/BnaCnng53900D/BnaCnng65550D	28
biological_process	GO:0009833	plant-type primary cell wall biogenesis	20/5096	20/76374	2.95492e-24	1.34973e-22	7.0035e-23	BnaA01g04600D/BnaA01g05450D/BnaA02g34360D/BnaA03g52020D/BnaA03g55200D/BnaA03g55860D/BnaA06g23700D/BnaA08g16590D/BnaA09g06990D/BnaAnng01240D/BnaC01g00330D/BnaC01g06090D/BnaC02g02440D/BnaC02g34680D/BnaC02g43280D/BnaC03g02050D/BnaC03g03990D/BnaC03g49550D/BnaC09g06600D/BnaCnng46970D	20
biological_process	GO:0050982	detection of mechanical stimulus	20/5096	20/76374	2.95492e-24	1.34973e-22	7.0035e-23	BnaA02g01110D/BnaA02g04270D/BnaA03g03770D/BnaA03g07620D/BnaA03g07630D/BnaA10g15600D/BnaA10g15610D/BnaA10g20580D/BnaA10g29710D/BnaC02g04230D/BnaC02g08770D/BnaC02g08780D/BnaC03g05290D/BnaC03g05320D/BnaC03g09640D/BnaC03g09650D/BnaC03g27070D/BnaC03g27080D/BnaC09g38160D/BnaC09g44590D	20
biological_process	GO:0090332	stomatal closure	34/5096	62/76374	5.19247e-24	2.29767e-22	1.19222e-22	BnaA02g08820D/BnaA03g11100D/BnaA03g11140D/BnaA03g39320D/BnaA03g59360D/BnaA06g03820D/BnaA07g00920D/BnaA09g05850D/BnaA09g05860D/BnaA09g10080D/BnaA09g29090D/BnaA10g27060D/BnaA10g27070D/BnaA10g27080D/BnaAnng12060D/BnaAnng12070D/BnaC01g27600D/BnaC03g13470D/BnaC03g13870D/BnaC03g13930D/BnaC03g46680D/BnaC03g46690D/BnaC04g18270D/BnaC04g18290D/BnaC04g42010D/BnaC04g42020D/BnaC05g20170D/BnaC05g24360D/BnaC06g…	34
biological_process	GO:0043085	positive regulation of catalytic activity	90/5096	417/76374	2.91462e-23	1.25064e-21	6.48933e-22	BnaA01g04740D/BnaA01g06940D/BnaA01g08660D/BnaA01g13990D/BnaA01g16240D/BnaA01g34430D/BnaA03g02510D/BnaA03g02560D/BnaA03g06500D/BnaA03g19240D/BnaA03g28980D/BnaA03g39650D/BnaA03g43320D/BnaA03g46830D/BnaA03g49910D/BnaA03g55140D/BnaA04g03360D/BnaA04g04350D/BnaA04g05650D/BnaA05g01890D/BnaA05g05660D/BnaA05g27980D/BnaA05g32480D/BnaA06g22280D/BnaA06g22820D/BnaA06g30310D/BnaA06g35980D/BnaA07g16660D/BnaA08g…	90
biological_process	GO:0006002	fructose 6-phosphate metabolic process	26/5096	36/76374	3.34005e-23	1.39103e-21	7.21782e-22	BnaA01g07610D/BnaA02g08550D/BnaA03g10690D/BnaA03g40360D/BnaA06g08370D/BnaA08g16020D/BnaA08g28830D/BnaA09g42580D/BnaA10g04550D/BnaA10g10800D/BnaAnng15770D/BnaC01g09280D/BnaC02g12110D/BnaC03g13370D/BnaC03g61050D/BnaC05g04910D/BnaC05g09740D/BnaC07g09630D/BnaC07g20530D/BnaC07g31330D/BnaC08g01990D/BnaC08g15270D/BnaC08g35040D/BnaC08g41630D/BnaC08g45130D/BnaC09g33200D	26
biological_process	GO:0016099	monoterpenoid biosynthetic process	19/5096	19/76374	4.44401e-23	1.79792e-21	9.32909e-22	BnaA01g22200D/BnaA03g22980D/BnaA03g24650D/BnaA03g54540D/BnaA06g33330D/BnaA06g33340D/BnaA06g33360D/BnaA08g30380D/BnaC01g43070D/BnaC02g34460D/BnaC02g34480D/BnaC03g27100D/BnaC07g22980D/BnaC07g23000D/BnaC08g34130D/BnaC08g48040D/BnaCnng41250D/BnaCnng52840D/BnaCnng60530D	19
molecular_function	GO:0008381	mechanosensitive ion channel activity	20/5096	21/76374	5.81244e-23	2.28623e-21	1.18628e-21	BnaA02g01110D/BnaA02g04270D/BnaA03g03770D/BnaA03g07620D/BnaA03g07630D/BnaA10g15600D/BnaA10g15610D/BnaA10g20580D/BnaA10g29710D/BnaC02g04230D/BnaC02g08770D/BnaC02g08780D/BnaC03g05290D/BnaC03g05320D/BnaC03g09640D/BnaC03g09650D/BnaC03g27070D/BnaC03g27080D/BnaC09g38160D/BnaC09g44590D	20
molecular_function	GO:0004340	glucokinase activity	23/5096	29/76374	2.77776e-22	1.03508e-20	5.37085e-21	BnaA01g00240D/BnaA05g15840D/BnaA05g19110D/BnaA06g02800D/BnaA07g00920D/BnaA08g02130D/BnaA08g15820D/BnaA09g10080D/BnaA10g05030D/BnaC01g01180D/BnaC01g21580D/BnaC03g61220D/BnaC03g68660D/BnaC05g26650D/BnaC05g32490D/BnaC06g01220D/BnaC06g03640D/BnaC06g03650D/BnaC07g01200D/BnaC07g12240D/BnaC08g36510D/BnaC09g10170D/BnaCnng58160D	23
molecular_function	GO:0050551	myrcene synthase activity	23/5096	29/76374	2.77776e-22	1.03508e-20	5.37085e-21	BnaA01g22200D/BnaA03g22980D/BnaA03g24650D/BnaA03g54540D/BnaA06g33330D/BnaA06g33340D/BnaA06g33360D/BnaA08g30380D/BnaAnng13440D/BnaAnng28010D/BnaAnng40250D/BnaC01g41830D/BnaC01g43070D/BnaC02g34460D/BnaC02g34480D/BnaC03g27100D/BnaC07g22980D/BnaC07g23000D/BnaC08g34130D/BnaC08g48040D/BnaCnng41250D/BnaCnng52840D/BnaCnng60530D	23
molecular_function	GO:0003872	6-phosphofructokinase activity	26/5096	38/76374	3.11758e-22	1.13192e-20	5.87333e-21	BnaA01g07610D/BnaA02g08550D/BnaA03g10690D/BnaA03g40360D/BnaA06g03380D/BnaA06g08370D/BnaA06g35220D/BnaA08g16020D/BnaA09g42580D/BnaA10g10800D/BnaAnng40390D/BnaC01g09280D/BnaC02g12110D/BnaC02g36920D/BnaC03g13370D/BnaC03g61050D/BnaC05g09740D/BnaC07g09630D/BnaC07g20530D/BnaC07g31330D/BnaC08g15270D/BnaC08g35040D/BnaC08g41630D/BnaC09g27470D/BnaC09g33200D/BnaCnng60300D	26
cellular_component	GO:0022626	cytosolic ribosome	86/5096	401/76374	4.19457e-22	1.48488e-20	7.70476e-21	BnaA01g29420D/BnaA02g03140D/BnaA02g12430D/BnaA03g22260D/BnaA03g33370D/BnaA03g34780D/BnaA03g39320D/BnaA03g53180D/BnaA03g59360D/BnaA04g07450D/BnaA04g08160D/BnaA04g16190D/BnaA05g22420D/BnaA05g25060D/BnaA06g03770D/BnaA06g03820D/BnaA06g14510D/BnaA06g14520D/BnaA07g11360D/BnaA07g11370D/BnaA07g13530D/BnaA08g10870D/BnaA08g21730D/BnaA08g29950D/BnaA09g05850D/BnaA09g05860D/BnaA09g12110D/BnaA09g13310D/BnaA09g…	86
biological_process	GO:0006012	galactose metabolic process	41/5096	102/76374	5.18022e-22	1.78907e-20	9.28317e-21	BnaA01g13540D/BnaA01g17720D/BnaA01g32750D/BnaA01g32760D/BnaA02g17750D/BnaA02g31160D/BnaA03g29500D/BnaA04g16570D/BnaA04g26930D/BnaA05g00720D/BnaA05g09030D/BnaA05g30800D/BnaA08g06120D/BnaA08g16030D/BnaA09g03730D/BnaA09g14600D/BnaA09g15290D/BnaA09g22180D/BnaA09g25900D/BnaA09g48480D/BnaA10g10190D/BnaAnng36060D/BnaC01g15760D/BnaC01g22060D/BnaC02g39720D/BnaC04g00330D/BnaC04g51460D/BnaC05g21890D/BnaC05g…	41
molecular_function	GO:0002020	protease binding	29/5096	49/76374	5.59429e-22	1.88607e-20	9.7865e-21	BnaA02g15820D/BnaA03g39320D/BnaA03g59360D/BnaA06g03820D/BnaA07g23190D/BnaA07g29880D/BnaA09g05850D/BnaA09g05860D/BnaA09g29090D/BnaA10g27060D/BnaA10g27070D/BnaA10g27080D/BnaAnng12060D/BnaAnng12070D/BnaC01g27600D/BnaC02g21080D/BnaC03g46680D/BnaC03g46690D/BnaC04g18270D/BnaC04g18290D/BnaC04g42010D/BnaC04g42020D/BnaC05g20170D/BnaC06g01970D/BnaC06g43790D/BnaCnng03460D/BnaCnng03470D/BnaCnng33910D/BnaCnng…	29
molecular_function	GO:0010333	terpene synthase activity	20/5096	22/76374	5.98893e-22	1.97217e-20	1.02332e-20	BnaA03g26050D/BnaA03g33430D/BnaA03g33440D/BnaA03g33460D/BnaA03g60000D/BnaA09g01090D/BnaA09g13870D/BnaAnng04000D/BnaAnng31910D/BnaAnng36420D/BnaC02g31080D/BnaC03g30630D/BnaC03g38590D/BnaC04g18760D/BnaC07g18170D/BnaC09g00230D/BnaCnng04030D/BnaCnng04040D/BnaCnng10080D/BnaCnng41750D	20
biological_process	GO:0006000	fructose metabolic process	18/5096	18/76374	6.6823e-22	2.05699e-20	1.06733e-20	BnaA04g04350D/BnaA05g10520D/BnaA08g28830D/BnaA08g29810D/BnaA10g04550D/BnaAnng15770D/BnaAnng17190D/BnaAnng17200D/BnaC03g28890D/BnaC03g76750D/BnaC04g11560D/BnaC04g26530D/BnaC05g04910D/BnaC08g01990D/BnaC08g45130D/BnaC08g46760D/BnaC08g48810D/BnaCnng53590D	18
biological_process	GO:0042593	glucose homeostasis	18/5096	18/76374	6.6823e-22	2.05699e-20	1.06733e-20	BnaA01g19370D/BnaA02g35880D/BnaA06g13580D/BnaA06g13670D/BnaA07g21790D/BnaA07g31980D/BnaA08g10550D/BnaA08g29490D/BnaA09g15940D/BnaA09g44150D/BnaAnng04430D/BnaAnng38010D/BnaC02g40330D/BnaC06g22500D/BnaC06g35990D/BnaC08g36710D/BnaCnng08080D/BnaCnng44260D	18
biological_process	GO:0051762	sesquiterpene biosynthetic process	18/5096	18/76374	6.6823e-22	2.05699e-20	1.06733e-20	BnaA02g22750D/BnaA03g59500D/BnaA03g59510D/BnaA04g09360D/BnaA06g26510D/BnaAnng04260D/BnaAnng04280D/BnaAnng36420D/BnaC02g13490D/BnaC02g19300D/BnaC02g31080D/BnaC07g16660D/BnaC07g18170D/BnaC07g30440D/BnaC07g30450D/BnaCnng27320D/BnaCnng41750D/BnaCnng74840D	18
biological_process	GO:0009970	cellular response to sulfate starvation	34/5096	70/76374	9.51725e-22	2.86732e-20	1.4878e-20	BnaA03g53180D/BnaA05g13500D/BnaA06g00050D/BnaA06g14510D/BnaA06g14520D/BnaA07g11360D/BnaA07g11370D/BnaA08g00140D/BnaA08g04710D/BnaA08g10870D/BnaA08g21730D/BnaA09g12110D/BnaA09g53040D/BnaA10g03820D/BnaAnng39310D/BnaC01g03420D/BnaC03g65530D/BnaC03g70970D/BnaC04g10980D/BnaC04g21590D/BnaC05g03730D/BnaC05g15970D/BnaC05g15990D/BnaC05g32410D/BnaC05g51490D/BnaC06g11170D/BnaC07g15160D/BnaC07g15270D/BnaC07g…	34
biological_process	GO:0009266	response to temperature stimulus	87/5096	420/76374	2.73658e-21	8.07292e-20	4.18889e-20	BnaA01g04600D/BnaA01g05320D/BnaA01g19380D/BnaA01g33660D/BnaA02g00740D/BnaA02g12320D/BnaA02g12430D/BnaA02g15820D/BnaA03g19470D/BnaA03g41360D/BnaA03g52020D/BnaA03g55200D/BnaA04g01120D/BnaA04g03580D/BnaA04g03590D/BnaA04g08160D/BnaA04g12990D/BnaA04g23920D/BnaA04g26750D/BnaA05g01090D/BnaA05g04720D/BnaA05g33200D/BnaA05g34460D/BnaA06g03020D/BnaA07g18800D/BnaA07g23190D/BnaA07g25510D/BnaA07g29880D/BnaA07g…	87
biological_process	GO:0005986	sucrose biosynthetic process	34/5096	72/76374	3.02962e-21	8.75498e-20	4.5428e-20	BnaA03g08110D/BnaA04g03360D/BnaA04g10260D/BnaA05g10520D/BnaA05g12940D/BnaA06g29670D/BnaA07g16660D/BnaA07g22680D/BnaA07g30830D/BnaA08g00340D/BnaA08g29810D/BnaA09g00710D/BnaA09g35380D/BnaA10g14710D/BnaA10g15120D/BnaC02g31640D/BnaC03g10290D/BnaC03g70760D/BnaC03g70770D/BnaC04g11560D/BnaC04g25260D/BnaC04g56100D/BnaC06g12120D/BnaC06g23590D/BnaC06g34330D/BnaC06g42620D/BnaC07g27090D/BnaC08g26740D/BnaC08g…	34
molecular_function	GO:0004335	galactokinase activity	25/5096	37/76374	3.21508e-21	9.10512e-20	4.72448e-20	BnaA01g17720D/BnaA01g32750D/BnaA01g32760D/BnaA02g17750D/BnaA02g31160D/BnaA03g29500D/BnaA04g16570D/BnaA05g05660D/BnaA05g30800D/BnaA08g06120D/BnaA08g16030D/BnaA09g03730D/BnaA09g14600D/BnaA10g10190D/BnaAnng36060D/BnaC01g22060D/BnaC02g39720D/BnaC04g05440D/BnaC05g21890D/BnaC05g45250D/BnaC08g24480D/BnaC08g48090D/BnaC09g03160D/BnaC09g18890D/BnaCnng32630D	25
molecular_function	GO:0004575	sucrose alpha-glucosidase activity	23/5096	31/76374	4.04468e-21	1.12299e-19	5.82701e-20	BnaA03g16550D/BnaA03g24030D/BnaA04g05320D/BnaA05g30860D/BnaA05g34980D/BnaA06g08310D/BnaA08g06300D/BnaA09g10560D/BnaA09g10570D/BnaA09g12880D/BnaA09g47290D/BnaAnng07590D/BnaAnng38240D/BnaC03g19970D/BnaC03g28560D/BnaC04g28060D/BnaC05g09640D/BnaC05g45320D/BnaC08g06790D/BnaC08g41390D/BnaC09g10830D/BnaC09g10840D/BnaC09g13230D	23
molecular_function	GO:0015415	ATPase-coupled phosphate ion transmembrane transporter activity	19/5096	21/76374	8.19074e-21	2.2304e-19	1.15732e-19	BnaA02g18110D/BnaA03g35470D/BnaA06g14710D/BnaA07g21370D/BnaA07g32730D/BnaA07g32740D/BnaA07g32750D/BnaA08g21590D/BnaC05g16100D/BnaC05g16110D/BnaC05g16120D/BnaC06g21850D/BnaC06g37180D/BnaC06g37190D/BnaC06g37200D/BnaC06g37210D/BnaC06g37230D/BnaC08g19520D/BnaCnng78100D	19
molecular_function	GO:0004096	catalase activity	21/5096	26/76374	9.31172e-21	2.44174e-19	1.26698e-19	BnaA03g53180D/BnaA06g14510D/BnaA06g14520D/BnaA07g11360D/BnaA07g11370D/BnaA08g10870D/BnaA08g21730D/BnaA09g12110D/BnaA09g53040D/BnaAnng11640D/BnaC01g03420D/BnaC03g65530D/BnaC04g21590D/BnaC05g15970D/BnaC05g15990D/BnaC07g15160D/BnaC07g15270D/BnaC07g15280D/BnaC08g19360D/BnaC09g12080D/BnaCnng25140D	21
biological_process	GO:1901684	arsenate ion transmembrane transport	21/5096	26/76374	9.31172e-21	2.44174e-19	1.26698e-19	BnaA02g18110D/BnaA03g18250D/BnaA03g35470D/BnaA06g14710D/BnaA07g21370D/BnaA07g32730D/BnaA07g32740D/BnaA07g32750D/BnaA08g21590D/BnaC03g72240D/BnaC05g16100D/BnaC05g16110D/BnaC05g16120D/BnaC06g21850D/BnaC06g37180D/BnaC06g37190D/BnaC06g37200D/BnaC06g37210D/BnaC06g37230D/BnaC08g19520D/BnaCnng78100D	21
biological_process	GO:0010411	xyloglucan metabolic process	27/5096	46/76374	1.9981e-20	5.1442e-19	2.66923e-19	BnaA01g06730D/BnaA01g06740D/BnaA02g16910D/BnaA02g16920D/BnaA02g16930D/BnaA02g35260D/BnaA03g10220D/BnaA03g50060D/BnaA03g50070D/BnaA07g22270D/BnaA07g22280D/BnaA07g31500D/BnaA07g31510D/BnaA10g23440D/BnaA10g29070D/BnaAnng31590D/BnaC01g08110D/BnaC01g08120D/BnaC02g11510D/BnaC03g12890D/BnaC03g67970D/BnaC05g14360D/BnaC06g23080D/BnaC06g23090D/BnaC06g35290D/BnaC06g35300D/BnaC09g48110D	27
biological_process	GO:0042631	cellular response to water deprivation	79/5096	372/76374	3.71015e-20	9.38137e-19	4.86782e-19	BnaA01g01360D/BnaA01g17560D/BnaA01g27470D/BnaA02g09470D/BnaA02g15180D/BnaA02g21470D/BnaA02g27970D/BnaA02g29010D/BnaA02g35200D/BnaA02g35770D/BnaA03g04160D/BnaA03g11720D/BnaA03g14580D/BnaA03g37990D/BnaA03g59170D/BnaA04g26270D/BnaA05g11240D/BnaA06g31910D/BnaA07g05850D/BnaA07g07410D/BnaA07g24020D/BnaA07g28470D/BnaA07g28910D/BnaA08g06640D/BnaA08g07400D/BnaA08g15200D/BnaA08g17440D/BnaA09g02120D/BnaA09g…	79
molecular_function	GO:0003983	UTP:glucose-1-phosphate uridylyltransferase activity	16/5096	16/76374	1.51004e-19	3.75125e-18	1.94646e-18	BnaA01g34430D/BnaA03g06500D/BnaA03g28980D/BnaA05g08890D/BnaA05g32480D/BnaA08g08070D/BnaA09g25420D/BnaA09g40940D/BnaAnng25620D/BnaC03g08320D/BnaC03g08340D/BnaC04g10300D/BnaC08g09320D/BnaC08g33440D/BnaCnng18460D/BnaCnng53900D	16
molecular_function	GO:0050378	UDP-glucuronate 4-epimerase activity	17/5096	18/76374	1.6947e-19	4.13739e-18	2.14682e-18	BnaA01g06610D/BnaA01g23480D/BnaA02g21470D/BnaA03g37120D/BnaA03g50170D/BnaA03g56770D/BnaA07g06190D/BnaA09g21060D/BnaAnng18570D/BnaC02g28500D/BnaC03g25270D/BnaC03g74010D/BnaC04g08650D/BnaC07g07730D/BnaC09g23320D/BnaCnng44170D/BnaCnng70410D	17
biological_process	GO:0010187	negative regulation of seed germination	36/5096	91/76374	3.09148e-19	7.41955e-18	3.84987e-18	BnaA02g08820D/BnaA03g11100D/BnaA03g11140D/BnaA03g24740D/BnaA03g39320D/BnaA03g59360D/BnaA06g03820D/BnaA09g05850D/BnaA09g05860D/BnaA09g21880D/BnaA09g29090D/BnaA10g27060D/BnaA10g27070D/BnaA10g27080D/BnaAnng12060D/BnaAnng12070D/BnaC01g15090D/BnaC01g27600D/BnaC03g13470D/BnaC03g13870D/BnaC03g13930D/BnaC03g29350D/BnaC03g46680D/BnaC03g46690D/BnaC04g18270D/BnaC04g18290D/BnaC04g42010D/BnaC04g42020D/BnaC05g…	36
molecular_function	GO:0008878	glucose-1-phosphate adenylyltransferase activity	20/5096	27/76374	1.66042e-18	3.9186e-17	2.03329e-17	BnaA01g12640D/BnaA04g12270D/BnaA06g30310D/BnaA06g40730D/BnaA07g04740D/BnaA09g05340D/BnaA09g27810D/BnaA10g03820D/BnaA10g15850D/BnaAnng08760D/BnaC02g08620D/BnaC03g58050D/BnaC04g33380D/BnaC05g03730D/BnaC05g21440D/BnaC07g47330D/BnaC09g54280D/BnaCnng00430D/BnaCnng59960D/BnaUnng03050D	20
biological_process	GO:0010321	regulation of vegetative phase change	15/5096	15/76374	2.26933e-18	5.18287e-17	2.6893e-17	BnaA01g28740D/BnaA04g19840D/BnaA05g09840D/BnaA05g14670D/BnaA05g24340D/BnaA06g01110D/BnaC01g36290D/BnaC03g18800D/BnaC04g44230D/BnaC05g38350D/BnaC06g10070D/BnaC06g41420D/BnaC09g34550D/BnaC09g34560D/BnaCnng05200D	15
biological_process	GO:0016051	carbohydrate biosynthetic process	48/5096	167/76374	2.26498e-18	5.18287e-17	2.6893e-17	BnaA01g33020D/BnaA03g17980D/BnaA03g27840D/BnaA04g17670D/BnaA04g22110D/BnaA04g26930D/BnaA05g00720D/BnaA05g01360D/BnaA05g06410D/BnaA05g27020D/BnaA06g31630D/BnaA06g40930D/BnaA07g04020D/BnaA07g18060D/BnaA09g02250D/BnaA09g15290D/BnaA09g48480D/BnaA09g49760D/BnaA09g55340D/BnaA10g27900D/BnaAnng24090D/BnaC03g05300D/BnaC03g25780D/BnaC03g32890D/BnaC03g57470D/BnaC03g72160D/BnaC04g00330D/BnaC04g06670D/BnaC04g…	48
cellular_component	GO:0005945	6-phosphofructokinase complex	22/5096	34/76374	3.25733e-18	7.32125e-17	3.79886e-17	BnaA01g07610D/BnaA02g08550D/BnaA03g10690D/BnaA03g40360D/BnaA06g08370D/BnaA06g35220D/BnaA08g16020D/BnaA09g42580D/BnaA10g10800D/BnaAnng40390D/BnaC01g09280D/BnaC02g12110D/BnaC03g13370D/BnaC03g61050D/BnaC05g09740D/BnaC07g09630D/BnaC07g20530D/BnaC07g31330D/BnaC08g15270D/BnaC08g35040D/BnaC08g41630D/BnaC09g33200D	22
biological_process	GO:0019253	reductive pentose-phosphate cycle	25/5096	46/76374	6.65981e-18	1.47348e-16	7.64564e-17	BnaA04g03360D/BnaA04g04350D/BnaA04g08570D/BnaA04g08640D/BnaA04g12000D/BnaA07g16660D/BnaA08g04610D/BnaA09g35380D/BnaA09g43380D/BnaAnng17190D/BnaAnng17200D/BnaAnng36210D/BnaC03g28890D/BnaC03g76750D/BnaC04g25260D/BnaC04g26530D/BnaC04g30810D/BnaC04g30870D/BnaC04g33690D/BnaC06g15060D/BnaC06g42620D/BnaC08g26740D/BnaC08g35990D/BnaC08g46180D/BnaC08g48810D	25
biological_process	GO:0071280	cellular response to copper ion	14/5096	14/76374	3.40981e-17	7.42813e-16	3.85432e-16	BnaA01g35060D/BnaA03g44480D/BnaA06g05150D/BnaA09g17180D/BnaA09g48720D/BnaC02g47470D/BnaC05g06430D/BnaC07g18150D/BnaC07g36310D/BnaC08g42970D/BnaC09g18360D/BnaCnng39720D/BnaCnng39730D/BnaCnng39740D	14
biological_process	GO:0046835	carbohydrate phosphorylation	23/5096	41/76374	5.37209e-17	1.15256e-15	5.98041e-16	BnaA01g17720D/BnaA01g32750D/BnaA01g32760D/BnaA02g17750D/BnaA02g31160D/BnaA03g29500D/BnaA04g16570D/BnaA05g30800D/BnaA08g06120D/BnaA08g16030D/BnaA09g03730D/BnaA09g14600D/BnaA10g10190D/BnaAnng36060D/BnaC01g22060D/BnaC02g39720D/BnaC05g21890D/BnaC05g45250D/BnaC08g24480D/BnaC08g48090D/BnaC09g03160D/BnaC09g18890D/BnaCnng32630D	23
biological_process	GO:0009646	response to absence of light	41/5096	134/76374	5.58128e-17	1.17957e-15	6.12056e-16	BnaA01g03820D/BnaA01g13710D/BnaA01g32560D/BnaA02g01470D/BnaA03g13330D/BnaA03g19470D/BnaA03g29700D/BnaA03g46540D/BnaA03g56550D/BnaA04g22680D/BnaA04g23920D/BnaA05g03290D/BnaA05g05590D/BnaA06g17510D/BnaA06g20540D/BnaA08g11930D/BnaA10g16660D/BnaA10g20100D/BnaC01g05180D/BnaC01g08680D/BnaC01g16110D/BnaC02g04550D/BnaC03g16140D/BnaC03g22390D/BnaC03g23350D/BnaC03g34940D/BnaC03g53730D/BnaC03g66780D/BnaC03g…	41
biological_process	GO:0010030	positive regulation of seed germination	31/5096	78/76374	7.72652e-17	1.60893e-15	8.34847e-16	BnaA01g19370D/BnaA01g23280D/BnaA01g24440D/BnaA02g35880D/BnaA03g36810D/BnaA05g16860D/BnaA06g13580D/BnaA06g13670D/BnaA07g21790D/BnaA07g31980D/BnaA08g10550D/BnaA08g29490D/BnaA09g15940D/BnaA09g44150D/BnaA09g49440D/BnaA10g04840D/BnaAnng04430D/BnaAnng38010D/BnaC02g40330D/BnaC05g05180D/BnaC05g29670D/BnaC06g06590D/BnaC06g20460D/BnaC06g22500D/BnaC06g35990D/BnaC08g36710D/BnaCnng08080D/BnaCnng14300D/BnaCnng…	31
biological_process	GO:0019216	regulation of lipid metabolic process	30/5096	73/76374	7.97237e-17	1.63607e-15	8.48927e-16	BnaA01g35430D/BnaA02g17050D/BnaA02g26450D/BnaA03g36320D/BnaA03g39650D/BnaA03g41980D/BnaA06g13360D/BnaA06g22280D/BnaA07g21940D/BnaA07g31890D/BnaA08g04610D/BnaA09g06230D/BnaA10g13400D/BnaC01g22400D/BnaC01g24130D/BnaC01g26460D/BnaC02g34570D/BnaC03g42170D/BnaC03g51460D/BnaC05g14920D/BnaC06g22680D/BnaC06g35760D/BnaC07g33090D/BnaC08g46180D/BnaC09g50930D/BnaC09g53990D/BnaC09g54000D/BnaCnng08220D/BnaCnng…	30
biological_process	GO:0006073	cellular glucan metabolic process	31/5096	79/76374	1.19016e-16	2.40752e-15	1.24922e-15	BnaA01g06750D/BnaA01g15000D/BnaA02g22470D/BnaA02g26000D/BnaA02g35250D/BnaA02g35330D/BnaA03g50050D/BnaA05g16360D/BnaA06g18630D/BnaA06g34490D/BnaA08g06970D/BnaA08g13110D/BnaA10g11500D/BnaA10g29060D/BnaAnng03530D/BnaAnng23050D/BnaAnng35740D/BnaC01g08130D/BnaC01g17710D/BnaC02g11470D/BnaC02g11480D/BnaC02g11500D/BnaC02g34110D/BnaC03g55190D/BnaC03g67960D/BnaC03g67980D/BnaC05g28950D/BnaC07g21270D/BnaC09g…	31
biological_process	GO:0015770	sucrose transport	26/5096	55/76374	1.33582e-16	2.66412e-15	1.38236e-15	BnaA01g36640D/BnaA02g15620D/BnaA02g26600D/BnaA03g35480D/BnaA03g35490D/BnaA03g52810D/BnaA05g19250D/BnaA06g05900D/BnaA06g33960D/BnaA07g23350D/BnaA07g29680D/BnaA09g57200D/BnaC01g28090D/BnaC01g32940D/BnaC02g20830D/BnaC02g34840D/BnaC03g02450D/BnaC03g41250D/BnaC03g41260D/BnaC05g32770D/BnaC05g49240D/BnaC06g32880D/BnaC07g21980D/BnaC08g09590D/BnaC08g42460D/BnaCnng07770D	26
biological_process	GO:0009082	branched-chain amino acid biosynthetic process	18/5096	25/76374	2.03738e-16	4.00685e-15	2.07908e-15	BnaA01g23200D/BnaA03g14730D/BnaA04g01910D/BnaA04g18470D/BnaA05g11160D/BnaA07g05810D/BnaA07g17940D/BnaA09g55140D/BnaA09g55150D/BnaC01g30200D/BnaC03g17780D/BnaC04g12850D/BnaC04g23500D/BnaC04g42560D/BnaC04g42590D/BnaC06g16700D/BnaC08g29320D/BnaC09g21470D	18
molecular_function	GO:0004610	phosphoacetylglucosamine mutase activity	13/5096	13/76374	5.12249e-16	9.54401e-15	4.95221e-15	BnaA02g03650D/BnaA02g15180D/BnaA03g06870D/BnaA07g28910D/BnaA10g16760D/BnaC02g20320D/BnaC02g20330D/BnaC02g44120D/BnaC03g08770D/BnaC05g36900D/BnaC05g36910D/BnaC06g31970D/BnaC09g39780D	13
biological_process	GO:0006048	UDP-N-acetylglucosamine biosynthetic process	13/5096	13/76374	5.12249e-16	9.54401e-15	4.95221e-15	BnaA02g03650D/BnaA02g15180D/BnaA03g06870D/BnaA07g28910D/BnaA10g16760D/BnaC02g20320D/BnaC02g20330D/BnaC02g44120D/BnaC03g08770D/BnaC05g36900D/BnaC05g36910D/BnaC06g31970D/BnaC09g39780D	13
molecular_function	GO:0019156	isoamylase activity	13/5096	13/76374	5.12249e-16	9.54401e-15	4.95221e-15	BnaA03g23880D/BnaA05g05660D/BnaA08g27410D/BnaA08g27420D/BnaA10g01800D/BnaAnng16650D/BnaC03g28400D/BnaC04g05440D/BnaC05g01880D/BnaC08g00230D/BnaC08g03780D/BnaC08g03940D/BnaCnng67200D	13
biological_process	GO:0030388	fructose 1,6-bisphosphate metabolic process	13/5096	13/76374	5.12249e-16	9.54401e-15	4.95221e-15	BnaA04g04350D/BnaA05g10520D/BnaA08g29810D/BnaAnng17190D/BnaAnng17200D/BnaC03g25780D/BnaC03g28890D/BnaC03g76750D/BnaC04g11560D/BnaC04g26530D/BnaC08g46760D/BnaC08g48810D/BnaCnng53590D	13
biological_process	GO:0080022	primary root development	33/5096	94/76374	6.18917e-16	1.13816e-14	5.90573e-15	BnaA01g33280D/BnaA02g29720D/BnaA03g27640D/BnaA03g34300D/BnaA03g34320D/BnaA04g12000D/BnaA05g23050D/BnaA05g34100D/BnaA06g08310D/BnaA06g31030D/BnaA07g20300D/BnaA09g02860D/BnaA09g43380D/BnaA09g47290D/BnaC01g10630D/BnaC01g44050D/BnaC01g44060D/BnaC02g25850D/BnaC02g37730D/BnaC03g39750D/BnaC04g33690D/BnaC05g09640D/BnaC05g36490D/BnaC05g48600D/BnaC06g19790D/BnaC07g25610D/BnaC08g35990D/BnaC08g41390D/BnaC09g…	33
molecular_function	GO:0030955	potassium ion binding	23/5096	46/76374	1.57614e-15	2.86129e-14	1.48467e-14	BnaA01g20680D/BnaA03g02560D/BnaA04g05070D/BnaA05g35800D/BnaA06g22820D/BnaA07g15940D/BnaA09g33340D/BnaA09g52300D/BnaA09g52310D/BnaA10g22870D/BnaAnng32070D/BnaC01g25930D/BnaC02g42660D/BnaC03g03680D/BnaC03g50680D/BnaC05g28630D/BnaC06g14360D/BnaC08g24180D/BnaC09g06050D/BnaC09g06060D/BnaC09g47410D/BnaCnng24100D/BnaCnng32880D	23
molecular_function	GO:0043169	cation binding	80/5096	455/76374	2.1586e-15	3.86908e-14	2.0076e-14	BnaA01g09070D/BnaA01g17940D/BnaA01g37210D/BnaA02g04930D/BnaA02g08480D/BnaA02g08900D/BnaA02g36650D/BnaA03g07240D/BnaA03g10550D/BnaA03g11260D/BnaA03g23880D/BnaA03g37260D/BnaA03g42940D/BnaA03g43760D/BnaA04g03760D/BnaA04g06280D/BnaA05g01890D/BnaA05g05660D/BnaA05g07860D/BnaA05g10780D/BnaA05g13090D/BnaA05g25660D/BnaA05g36120D/BnaA05g36350D/BnaA07g05790D/BnaA07g25350D/BnaA08g05660D/BnaA08g07600D/BnaA08g…	80
molecular_function	GO:0033946	xyloglucan-specific endo-beta-1,4-glucanase activity	16/5096	21/76374	2.22425e-15	3.93693e-14	2.0428e-14	BnaA01g06730D/BnaA01g06740D/BnaA02g35260D/BnaA03g10220D/BnaA03g50060D/BnaA03g50070D/BnaA06g18630D/BnaA10g29070D/BnaAnng03530D/BnaAnng31590D/BnaC01g08110D/BnaC01g08120D/BnaC02g11510D/BnaC03g12890D/BnaC03g55190D/BnaC03g67970D	16
biological_process	GO:0010342	endosperm cellularization	13/5096	14/76374	6.72821e-15	1.16185e-13	6.02862e-14	BnaA03g07280D/BnaA03g20700D/BnaA04g25600D/BnaA05g03800D/BnaA06g06280D/BnaA10g16260D/BnaAnng39950D/BnaC03g09230D/BnaC03g24730D/BnaC04g03410D/BnaC04g49500D/BnaC05g08040D/BnaC09g39110D	13
biological_process	GO:0019566	arabinose metabolic process	13/5096	14/76374	6.72821e-15	1.16185e-13	6.02862e-14	BnaA01g17720D/BnaA02g17750D/BnaA04g16570D/BnaA05g05660D/BnaA08g06120D/BnaA08g16030D/BnaA09g14600D/BnaC01g22060D/BnaC04g05440D/BnaC05g21890D/BnaC08g48090D/BnaC08g48100D/BnaC09g18890D	13
molecular_function	GO:0004450	isocitrate dehydrogenase (NADP+) activity	12/5096	12/76374	7.69401e-15	1.22413e-13	6.35177e-14	BnaA02g12320D/BnaA03g04970D/BnaA07g17800D/BnaA07g25510D/BnaAnng08060D/BnaAnng25840D/BnaAnng25850D/BnaC02g24620D/BnaC03g06570D/BnaC06g16500D/BnaC06g27300D/BnaCnng36970D	12
molecular_function	GO:0004735	pyrroline-5-carboxylate reductase activity	12/5096	12/76374	7.69401e-15	1.22413e-13	6.35177e-14	BnaA03g05080D/BnaA10g19050D/BnaC03g06620D/BnaC03g63470D/BnaC04g11450D/BnaC04g12260D/BnaC04g18790D/BnaC04g18800D/BnaC06g16280D/BnaC06g16290D/BnaC08g05470D/BnaC09g42740D	12
biological_process	GO:0046168	glycerol-3-phosphate catabolic process	12/5096	12/76374	7.69401e-15	1.22413e-13	6.35177e-14	BnaA03g19520D/BnaA04g10460D/BnaA04g23450D/BnaA05g02270D/BnaA05g29950D/BnaA07g15060D/BnaC03g23410D/BnaC04g01960D/BnaC04g32730D/BnaC04g47330D/BnaC05g44270D/BnaC06g42250D	12
molecular_function	GO:0050373	UDP-arabinose 4-epimerase activity	12/5096	12/76374	7.69401e-15	1.22413e-13	6.35177e-14	BnaA05g09030D/BnaA06g38100D/BnaA08g24600D/BnaA09g10850D/BnaA09g25900D/BnaC05g23640D/BnaC05g49280D/BnaC07g18040D/BnaC08g15730D/BnaCnng14830D/BnaCnng21690D/BnaCnng22570D	12
biological_process	GO:0055129	L-proline biosynthetic process	12/5096	12/76374	7.69401e-15	1.22413e-13	6.35177e-14	BnaA03g05080D/BnaA10g19050D/BnaC03g06620D/BnaC03g63470D/BnaC04g11450D/BnaC04g12260D/BnaC04g18790D/BnaC04g18800D/BnaC06g16280D/BnaC06g16290D/BnaC08g05470D/BnaC09g42740D	12
molecular_function	GO:0080016	(-)-E-beta-caryophyllene synthase activity	12/5096	12/76374	7.69401e-15	1.22413e-13	6.35177e-14	BnaA03g59500D/BnaA03g59510D/BnaA06g26510D/BnaAnng04260D/BnaAnng04280D/BnaC02g13490D/BnaC02g19300D/BnaC07g16660D/BnaC07g30440D/BnaC07g30450D/BnaCnng27320D/BnaCnng74840D	12
molecular_function	GO:0080017	alpha-humulene synthase activity	12/5096	12/76374	7.69401e-15	1.22413e-13	6.35177e-14	BnaA03g59500D/BnaA03g59510D/BnaA06g26510D/BnaAnng04260D/BnaAnng04280D/BnaC02g13490D/BnaC02g19300D/BnaC07g16660D/BnaC07g30440D/BnaC07g30450D/BnaCnng27320D/BnaCnng74840D	12
molecular_function	GO:0004743	pyruvate kinase activity	23/5096	49/76374	9.17329e-15	1.44326e-13	7.48884e-14	BnaA01g20680D/BnaA03g02560D/BnaA04g05070D/BnaA05g35800D/BnaA06g22820D/BnaA07g15940D/BnaA09g33340D/BnaA09g52300D/BnaA09g52310D/BnaA10g22870D/BnaAnng32070D/BnaC01g25930D/BnaC02g42660D/BnaC03g03680D/BnaC03g50680D/BnaC05g28630D/BnaC06g14360D/BnaC08g24180D/BnaC09g06050D/BnaC09g06060D/BnaC09g47410D/BnaCnng24100D/BnaCnng32880D	23
biological_process	GO:0044265	cellular macromolecule catabolic process	19/5096	33/76374	1.46101e-14	2.2734e-13	1.17963e-13	BnaA03g01150D/BnaA04g00380D/BnaA04g05950D/BnaA07g19430D/BnaA09g32380D/BnaA09g40130D/BnaA10g26130D/BnaAnng00900D/BnaC02g02780D/BnaC03g01520D/BnaC03g01530D/BnaC04g21210D/BnaC04g28570D/BnaC05g27860D/BnaC06g18590D/BnaC08g23150D/BnaC08g32470D/BnaC09g53220D/BnaCnng10420D	19
molecular_function	GO:0003978	UDP-glucose 4-epimerase activity	17/5096	26/76374	1.75144e-14	2.69569e-13	1.39874e-13	BnaA01g13540D/BnaA05g09030D/BnaA06g38100D/BnaA08g24600D/BnaA09g10850D/BnaA09g22180D/BnaA09g25900D/BnaC01g15760D/BnaC05g23640D/BnaC05g49280D/BnaC07g18040D/BnaC07g38610D/BnaC08g15730D/BnaC09g26030D/BnaCnng14830D/BnaCnng21690D/BnaCnng22570D	17
molecular_function	GO:0050897	cobalt ion binding	50/5096	222/76374	2.26942e-14	3.45537e-13	1.79293e-13	BnaA02g00740D/BnaA03g02040D/BnaA03g53180D/BnaA04g01160D/BnaA06g14510D/BnaA06g14520D/BnaA06g22770D/BnaA07g09080D/BnaA07g11360D/BnaA07g11370D/BnaA07g28560D/BnaA08g10870D/BnaA08g21730D/BnaA09g12110D/BnaA09g20120D/BnaA09g29700D/BnaA09g50980D/BnaA09g53040D/BnaA10g16660D/BnaA10g21510D/BnaA10g23880D/BnaAnng13720D/BnaC01g03420D/BnaC02g00040D/BnaC02g01610D/BnaC03g03050D/BnaC03g50730D/BnaC03g65530D/BnaC04g…	50
biological_process	GO:0001666	response to hypoxia	64/5096	337/76374	3.37756e-14	5.0879e-13	2.64002e-13	BnaA01g16450D/BnaA01g29490D/BnaA02g16660D/BnaA02g23460D/BnaA03g03230D/BnaA03g03670D/BnaA03g08110D/BnaA03g26890D/BnaA03g33290D/BnaA05g12940D/BnaA05g23660D/BnaA05g25200D/BnaA06g27590D/BnaA06g29670D/BnaA07g22680D/BnaA07g30830D/BnaA07g31170D/BnaA08g14100D/BnaA09g00140D/BnaA09g00710D/BnaA09g07110D/BnaA10g03060D/BnaA10g14710D/BnaA10g20680D/BnaAnng04700D/BnaAnng20420D/BnaAnng38950D/BnaC01g19640D/BnaC02g…	64
biological_process	GO:2000072	regulation of defense response to fungus, incompatible interaction	15/5096	21/76374	8.36901e-14	1.24742e-12	6.47266e-13	BnaA01g13250D/BnaA01g13260D/BnaA03g24740D/BnaA03g46050D/BnaA09g21880D/BnaC01g15070D/BnaC01g15090D/BnaC03g29350D/BnaC03g44000D/BnaC05g20210D/BnaC07g38370D/BnaC09g24130D/BnaCnng22650D/BnaCnng42110D/BnaUnng04040D	15
molecular_function	GO:0004807	triose-phosphate isomerase activity	11/5096	11/76374	1.15543e-13	1.66948e-12	8.66265e-13	BnaA04g03580D/BnaA04g03590D/BnaA04g12000D/BnaA07g37840D/BnaA09g35020D/BnaA09g43380D/BnaC04g25470D/BnaC04g25490D/BnaC04g33690D/BnaC08g26250D/BnaC08g35990D	11
biological_process	GO:0043693	monoterpene biosynthetic process	11/5096	11/76374	1.15543e-13	1.66948e-12	8.66265e-13	BnaA06g33330D/BnaA06g33340D/BnaA06g33360D/BnaA09g13640D/BnaA09g13650D/BnaC02g34460D/BnaC02g34480D/BnaC07g22980D/BnaC07g23000D/BnaCnng38820D/BnaCnng52840D	11
biological_process	GO:0071333	cellular response to glucose stimulus	11/5096	11/76374	1.15543e-13	1.66948e-12	8.66265e-13	BnaA02g31000D/BnaA02g32330D/BnaA06g27230D/BnaA06g29270D/BnaA06g29500D/BnaA09g03330D/BnaC02g39310D/BnaC02g41050D/BnaC07g27220D/BnaC07g27440D/BnaC07g29750D	11
molecular_function	GO:0015145	monosaccharide transmembrane transporter activity	19/5096	36/76374	1.26196e-13	1.80498e-12	9.36573e-13	BnaA01g36640D/BnaA03g29290D/BnaA03g29310D/BnaA03g35480D/BnaA03g35490D/BnaA05g19250D/BnaA05g31350D/BnaA06g06960D/BnaA09g47680D/BnaAnng03010D/BnaC01g28090D/BnaC01g32940D/BnaC03g34490D/BnaC03g41250D/BnaC03g41260D/BnaC05g08610D/BnaC05g32770D/BnaC05g45870D/BnaC08g42140D	19
biological_process	GO:0042744	hydrogen peroxide catabolic process	68/5096	390/76374	3.88608e-13	5.50269e-12	2.85525e-12	BnaA01g30320D/BnaA01g37210D/BnaA02g12430D/BnaA03g13420D/BnaA03g19470D/BnaA03g32440D/BnaA03g53180D/BnaA04g01120D/BnaA04g08160D/BnaA04g23920D/BnaA05g04720D/BnaA05g11730D/BnaA05g25660D/BnaA06g14510D/BnaA06g14520D/BnaA06g22280D/BnaA07g11360D/BnaA07g11370D/BnaA07g18800D/BnaA08g04610D/BnaA08g10870D/BnaA08g21730D/BnaA08g27870D/BnaA09g06230D/BnaA09g11300D/BnaA09g12110D/BnaA09g38720D/BnaA09g53040D/BnaA10g…	68
biological_process	GO:0009225	nucleotide-sugar metabolic process	21/5096	48/76374	7.49181e-13	1.05034e-11	5.45001e-12	BnaA01g06610D/BnaA01g23480D/BnaA02g21470D/BnaA03g37120D/BnaA03g50170D/BnaA03g56770D/BnaA05g09030D/BnaA07g06190D/BnaA09g21060D/BnaA09g25900D/BnaAnng18570D/BnaC02g28500D/BnaC03g25270D/BnaC03g74010D/BnaC04g08650D/BnaC05g23640D/BnaC07g07730D/BnaC09g23320D/BnaCnng22570D/BnaCnng44170D/BnaCnng70410D	21
biological_process	GO:0010289	homogalacturonan biosynthetic process	14/5096	20/76374	8.99769e-13	1.24909e-11	6.48131e-12	BnaA02g28840D/BnaA03g37710D/BnaA04g00880D/BnaA07g05040D/BnaA09g38850D/BnaC03g28580D/BnaC03g74220D/BnaC04g07440D/BnaC04g15340D/BnaC04g21950D/BnaC08g31110D/BnaCnng00120D/BnaCnng75670D/BnaUnng05030D	14
molecular_function	GO:0004564	beta-fructofuranosidase activity	13/5096	17/76374	9.44662e-13	1.28619e-11	6.67382e-12	BnaA01g02350D/BnaA01g37220D/BnaA05g25600D/BnaA05g25610D/BnaA06g00510D/BnaA09g41790D/BnaAnng15360D/BnaC01g03610D/BnaC01g37450D/BnaC03g65720D/BnaC05g39500D/BnaC05g39510D/BnaC06g07120D	13
molecular_function	GO:0046524	sucrose-phosphate synthase activity	13/5096	17/76374	9.44662e-13	1.28619e-11	6.67382e-12	BnaA02g04800D/BnaA02g23460D/BnaA03g03230D/BnaA06g27590D/BnaA10g03060D/BnaA10g15120D/BnaC02g29300D/BnaC03g04660D/BnaC05g02930D/BnaC05g27770D/BnaC07g29460D/BnaC09g37470D/BnaCnng65550D	13
molecular_function	GO:0016853	isomerase activity	23/5096	59/76374	1.17715e-12	1.58748e-11	8.23713e-12	BnaA04g01910D/BnaA06g08730D/BnaA06g22280D/BnaA07g17940D/BnaA07g18710D/BnaA08g12350D/BnaA09g06230D/BnaA09g46150D/BnaA09g55140D/BnaA09g55150D/BnaAnng18330D/BnaC03g14280D/BnaC03g51460D/BnaC03g67370D/BnaC04g23500D/BnaC05g10030D/BnaC06g16700D/BnaC06g17810D/BnaC08g29320D/BnaC09g50930D/BnaCnng31080D/BnaCnng76470D/BnaCnng76550D	23
molecular_function	GO:0004350	glutamate-5-semialdehyde dehydrogenase activity	10/5096	10/76374	1.73483e-12	2.0471e-11	1.0622e-11	BnaA03g18760D/BnaA04g03460D/BnaA04g22810D/BnaA05g05760D/BnaA09g35230D/BnaC03g72600D/BnaC04g05620D/BnaC04g46630D/BnaC04g55570D/BnaC08g26550D	10
molecular_function	GO:0004512	inositol-3-phosphate synthase activity	10/5096	10/76374	1.73483e-12	2.0471e-11	1.0622e-11	BnaA01g34710D/BnaA02g00400D/BnaA04g12720D/BnaA09g42760D/BnaA10g22070D/BnaC01g00680D/BnaC02g00460D/BnaC04g34650D/BnaC08g35240D/BnaC09g46450D	10
molecular_function	GO:0004801	sedoheptulose-7-phosphate:D-glyceraldehyde-3-phosphate glyceronetransferase activity	10/5096	10/76374	1.73483e-12	2.0471e-11	1.0622e-11	BnaA02g01610D/BnaA03g04310D/BnaA06g08320D/BnaA08g02750D/BnaA10g19920D/BnaC02g04730D/BnaC03g05850D/BnaC03g07200D/BnaC05g09650D/BnaC09g43670D	10
molecular_function	GO:0005547	phosphatidylinositol-3,4,5-trisphosphate binding	10/5096	10/76374	1.73483e-12	2.0471e-11	1.0622e-11	BnaA01g35060D/BnaA03g44480D/BnaA09g17180D/BnaC02g47470D/BnaC07g18150D/BnaC07g36310D/BnaC09g18360D/BnaCnng39720D/BnaCnng39730D/BnaCnng39740D	10
cellular_component	GO:0005881	cytoplasmic microtubule	10/5096	10/76374	1.73483e-12	2.0471e-11	1.0622e-11	BnaA01g35060D/BnaA03g44480D/BnaA09g17180D/BnaC02g47470D/BnaC07g18150D/BnaC07g36310D/BnaC09g18360D/BnaCnng39720D/BnaCnng39730D/BnaCnng39740D	10
molecular_function	GO:0009045	xylose isomerase activity	10/5096	10/76374	1.73483e-12	2.0471e-11	1.0622e-11	BnaA02g35210D/BnaA02g35220D/BnaA10g11590D/BnaC02g37140D/BnaC05g13980D/BnaC07g32400D/BnaC08g16640D/BnaC09g00930D/BnaC09g32660D/BnaCnng16600D	10
cellular_component	GO:0010330	cellulose synthase complex	10/5096	10/76374	1.73483e-12	2.0471e-11	1.0622e-11	BnaA01g05450D/BnaA02g34360D/BnaA03g55860D/BnaA06g23700D/BnaA09g06990D/BnaC01g00330D/BnaC02g43280D/BnaC03g03990D/BnaC03g49550D/BnaC09g06600D	10
biological_process	GO:0010350	cellular response to magnesium starvation	10/5096	10/76374	1.73483e-12	2.0471e-11	1.0622e-11	BnaA01g35060D/BnaA03g44480D/BnaA09g17180D/BnaC02g47470D/BnaC07g18150D/BnaC07g36310D/BnaC09g18360D/BnaCnng39720D/BnaCnng39730D/BnaCnng39740D	10
biological_process	GO:0031115	negative regulation of microtubule polymerization	10/5096	10/76374	1.73483e-12	2.0471e-11	1.0622e-11	BnaA01g35060D/BnaA03g44480D/BnaA09g17180D/BnaC02g47470D/BnaC07g18150D/BnaC07g36310D/BnaC09g18360D/BnaCnng39720D/BnaCnng39730D/BnaCnng39740D	10
biological_process	GO:0051511	negative regulation of unidimensional cell growth	10/5096	10/76374	1.73483e-12	2.0471e-11	1.0622e-11	BnaA01g35060D/BnaA03g44480D/BnaA09g17180D/BnaC02g47470D/BnaC07g18150D/BnaC07g36310D/BnaC09g18360D/BnaCnng39720D/BnaCnng39730D/BnaCnng39740D	10
biological_process	GO:0071286	cellular response to magnesium ion	10/5096	10/76374	1.73483e-12	2.0471e-11	1.0622e-11	BnaA01g35060D/BnaA03g44480D/BnaA09g17180D/BnaC02g47470D/BnaC07g18150D/BnaC07g36310D/BnaC09g18360D/BnaCnng39720D/BnaCnng39730D/BnaCnng39740D	10
biological_process	GO:0071325	cellular response to mannitol stimulus	10/5096	10/76374	1.73483e-12	2.0471e-11	1.0622e-11	BnaA01g35060D/BnaA03g44480D/BnaA09g17180D/BnaC02g47470D/BnaC07g18150D/BnaC07g36310D/BnaC09g18360D/BnaCnng39720D/BnaCnng39730D/BnaCnng39740D	10
biological_process	GO:0071370	cellular response to gibberellin stimulus	10/5096	10/76374	1.73483e-12	2.0471e-11	1.0622e-11	BnaA06g08310D/BnaA09g10560D/BnaA09g10570D/BnaA09g12880D/BnaA09g47290D/BnaC05g09640D/BnaC08g41390D/BnaC09g10830D/BnaC09g10840D/BnaC09g13230D	10
biological_process	GO:0072709	cellular response to sorbitol	10/5096	10/76374	1.73483e-12	2.0471e-11	1.0622e-11	BnaA01g35060D/BnaA03g44480D/BnaA09g17180D/BnaC02g47470D/BnaC07g18150D/BnaC07g36310D/BnaC09g18360D/BnaCnng39720D/BnaCnng39730D/BnaCnng39740D	10
biological_process	GO:0075733	intracellular transport of virus	10/5096	10/76374	1.73483e-12	2.0471e-11	1.0622e-11	BnaA01g35060D/BnaA03g44480D/BnaA09g17180D/BnaC02g47470D/BnaC07g18150D/BnaC07g36310D/BnaC09g18360D/BnaCnng39720D/BnaCnng39730D/BnaCnng39740D	10
biological_process	GO:0005982	starch metabolic process	41/5096	177/76374	1.7727e-12	2.0745e-11	1.07642e-11	BnaA01g25880D/BnaA03g16550D/BnaA03g27270D/BnaA03g53100D/BnaA03g53180D/BnaA04g05320D/BnaA05g19350D/BnaA06g02910D/BnaA06g11450D/BnaA06g11460D/BnaA06g14520D/BnaA06g29670D/BnaA07g11360D/BnaA07g26220D/BnaA08g10870D/BnaA09g00710D/BnaA09g12110D/BnaA09g53040D/BnaAnng07590D/BnaC01g03420D/BnaC01g33070D/BnaC02g31640D/BnaC03g19970D/BnaC03g32270D/BnaC03g65530D/BnaC04g21590D/BnaC04g28060D/BnaC05g13090D/BnaC05g…	41
molecular_function	GO:0004367	glycerol-3-phosphate dehydrogenase [NAD+] activity	12/5096	15/76374	2.89441e-12	3.35942e-11	1.74314e-11	BnaA03g19520D/BnaA04g10460D/BnaA04g23450D/BnaA05g02270D/BnaA05g29950D/BnaA07g15060D/BnaC03g23410D/BnaC04g01960D/BnaC04g32730D/BnaC04g47330D/BnaC05g44270D/BnaC06g42250D	12
cellular_component	GO:0010319	stromule	46/5096	219/76374	3.34186e-12	3.84721e-11	1.99625e-11	BnaA01g30320D/BnaA03g32440D/BnaA03g53180D/BnaA03g55140D/BnaA04g04350D/BnaA06g14520D/BnaA06g20580D/BnaA06g38600D/BnaA07g11360D/BnaA08g04610D/BnaA08g10870D/BnaA08g20600D/BnaA09g11300D/BnaA09g12110D/BnaA09g13310D/BnaA09g30060D/BnaA09g53040D/BnaA10g07730D/BnaAnng17190D/BnaAnng17200D/BnaC01g03420D/BnaC01g38270D/BnaC03g25780D/BnaC03g28890D/BnaC03g37820D/BnaC03g65530D/BnaC03g76750D/BnaC04g20560D/BnaC04g…	46
molecular_function	GO:0080025	phosphatidylinositol-3,5-bisphosphate binding	16/5096	29/76374	4.42658e-12	5.05487e-11	2.62288e-11	BnaA01g35060D/BnaA03g44480D/BnaA04g00380D/BnaA07g19430D/BnaA09g17180D/BnaA09g40130D/BnaC02g47470D/BnaC04g21210D/BnaC06g18590D/BnaC07g18150D/BnaC07g36310D/BnaC08g32470D/BnaC09g18360D/BnaCnng39720D/BnaCnng39730D/BnaCnng39740D	16
molecular_function	GO:0016655	oxidoreductase activity, acting on NAD(P)H, quinone or similar compound as acceptor	20/5096	47/76374	4.95079e-12	5.60826e-11	2.91003e-11	BnaA02g09580D/BnaA03g11850D/BnaA04g13300D/BnaA06g30540D/BnaA09g46140D/BnaA10g08330D/BnaA10g28340D/BnaA10g28860D/BnaA10g29720D/BnaAnng07980D/BnaC02g38290D/BnaC02g44190D/BnaC03g14590D/BnaC04g30390D/BnaC07g26250D/BnaCnng16580D/BnaCnng38420D/BnaCnng54350D/BnaCnng78280D/BnaUnng03800D	20
molecular_function	GO:0010181	FMN binding	39/5096	168/76374	5.65629e-12	6.3566e-11	3.29832e-11	BnaA01g01080D/BnaA01g29420D/BnaA02g07440D/BnaA02g09580D/BnaA02g26490D/BnaA03g11850D/BnaA03g33370D/BnaA04g05620D/BnaA04g08220D/BnaA04g09880D/BnaA04g13300D/BnaA05g25060D/BnaA06g06590D/BnaA08g30520D/BnaA09g46140D/BnaA10g08330D/BnaA10g28340D/BnaA10g28860D/BnaA10g29720D/BnaAnng18230D/BnaC01g02100D/BnaC01g08070D/BnaC01g36940D/BnaC02g10510D/BnaC02g20250D/BnaC02g44190D/BnaC03g14590D/BnaC03g38540D/BnaC04g…	39
biological_process	GO:0009639	response to red or far red light	31/5096	112/76374	6.34022e-12	7.0691e-11	3.66803e-11	BnaA01g36840D/BnaA03g35930D/BnaA03g40160D/BnaA05g01050D/BnaA05g20140D/BnaA05g20160D/BnaA06g32030D/BnaA08g02070D/BnaA10g00780D/BnaA10g22020D/BnaAnng17890D/BnaC01g32460D/BnaC02g36970D/BnaC02g37640D/BnaC03g00040D/BnaC03g05300D/BnaC03g25780D/BnaC03g41740D/BnaC04g00590D/BnaC05g00840D/BnaC05g31510D/BnaC07g02670D/BnaC07g24450D/BnaC09g05250D/BnaC09g46410D/BnaCnng43250D/BnaCnng45140D/BnaCnng45150D/BnaCnng…	31
biological_process	GO:0009615	response to virus	34/5096	133/76374	7.20864e-12	7.97455e-11	4.13785e-11	BnaA01g30490D/BnaA02g06210D/BnaA03g32320D/BnaA03g39320D/BnaA03g59360D/BnaA04g06970D/BnaA06g03820D/BnaA08g29820D/BnaA09g05850D/BnaA09g05860D/BnaA09g29090D/BnaA10g13350D/BnaA10g27060D/BnaA10g27070D/BnaA10g27080D/BnaAnng12060D/BnaAnng12070D/BnaC01g27600D/BnaC01g38510D/BnaC03g37680D/BnaC03g46680D/BnaC03g46690D/BnaC04g18270D/BnaC04g18290D/BnaC04g42010D/BnaC04g42020D/BnaC04g50970D/BnaC05g20170D/BnaC06g…	34
molecular_function	GO:0004345	glucose-6-phosphate dehydrogenase activity	13/5096	19/76374	9.48085e-12	1.04069e-10	5.39994e-11	BnaA03g04190D/BnaA06g32220D/BnaA07g15160D/BnaA08g30000D/BnaA09g01980D/BnaA10g20180D/BnaC03g05780D/BnaC06g13190D/BnaC07g24170D/BnaC09g01420D/BnaC09g43980D/BnaCnng48180D/BnaCnng78750D	13
biological_process	GO:0052386	cell wall thickening	12/5096	16/76374	1.08669e-11	1.18366e-10	6.1418e-11	BnaA02g03580D/BnaA03g06610D/BnaA03g58390D/BnaA04g13710D/BnaA05g11750D/BnaA06g36370D/BnaC02g30750D/BnaC02g44220D/BnaC02g44340D/BnaC03g08460D/BnaC07g17610D/BnaC07g50180D	12
molecular_function	GO:0050661	NADP binding	41/5096	189/76374	1.66229e-11	1.79679e-10	9.32323e-11	BnaA01g33660D/BnaA03g04190D/BnaA03g29410D/BnaA05g30990D/BnaA05g33200D/BnaA06g32220D/BnaA07g02540D/BnaA07g15160D/BnaA07g20300D/BnaA07g32810D/BnaA08g04610D/BnaA08g30000D/BnaA09g01980D/BnaA09g25320D/BnaA09g53140D/BnaA09g53150D/BnaA10g20180D/BnaAnng03180D/BnaAnng37030D/BnaC01g40210D/BnaC02g24100D/BnaC02g25850D/BnaC03g05780D/BnaC03g34680D/BnaC05g45470D/BnaC05g47450D/BnaC06g13190D/BnaC06g19790D/BnaC06g…	41
biological_process	GO:0030244	cellulose biosynthetic process	73/5096	472/76374	2.14783e-11	2.30404e-10	1.19552e-10	BnaA01g04600D/BnaA01g05450D/BnaA01g12900D/BnaA01g19380D/BnaA02g03580D/BnaA02g34360D/BnaA02g34720D/BnaA03g06610D/BnaA03g41360D/BnaA03g45730D/BnaA03g52020D/BnaA03g55200D/BnaA03g55860D/BnaA03g58390D/BnaA04g13710D/BnaA04g18860D/BnaA04g28830D/BnaA05g11750D/BnaA05g28060D/BnaA06g08910D/BnaA06g23700D/BnaA06g36370D/BnaA06g40490D/BnaA07g12390D/BnaA08g16430D/BnaA08g16590D/BnaA09g06990D/BnaA09g07760D/BnaA09g…	73
molecular_function	GO:0009702	L-arabinokinase activity	13/5096	20/76374	2.54171e-11	2.70606e-10	1.40413e-10	BnaA01g17720D/BnaA02g17750D/BnaA04g16570D/BnaA05g05660D/BnaA08g06120D/BnaA08g16030D/BnaA09g14600D/BnaC01g22060D/BnaC04g05440D/BnaC05g21890D/BnaC08g48090D/BnaC08g48100D/BnaC09g18890D	13
molecular_function	GO:0015250	water channel activity	34/5096	139/76374	2.70387e-11	2.85722e-10	1.48256e-10	BnaA01g09720D/BnaA01g28120D/BnaA03g17020D/BnaA03g17030D/BnaA03g27130D/BnaA03g34110D/BnaA03g43810D/BnaA04g15110D/BnaA05g07290D/BnaA05g07300D/BnaA05g23460D/BnaA05g37440D/BnaA09g51590D/BnaA09g51960D/BnaA10g00360D/BnaAnng22640D/BnaAnng24130D/BnaC01g11410D/BnaC01g44580D/BnaC02g27930D/BnaC03g32130D/BnaC03g39560D/BnaC04g08090D/BnaC04g08100D/BnaC04g38040D/BnaC05g00440D/BnaC05g37160D/BnaC05g47470D/BnaC06g…	34
biological_process	GO:0010021	amylopectin biosynthetic process	16/5096	32/76374	3.23144e-11	3.38942e-10	1.75871e-10	BnaA02g16660D/BnaA05g05660D/BnaA05g07860D/BnaA07g31170D/BnaA08g27410D/BnaA08g27420D/BnaA10g01800D/BnaA10g26450D/BnaAnng07370D/BnaC02g22570D/BnaC04g05440D/BnaC04g08890D/BnaC05g01880D/BnaC06g34860D/BnaC08g00230D/BnaCnng02680D	16
biological_process	GO:0009267	cellular response to starvation	12/5096	17/76374	3.46804e-11	3.61084e-10	1.8736e-10	BnaA03g21090D/BnaA04g26080D/BnaA06g29500D/BnaA07g19330D/BnaA07g38000D/BnaA09g03330D/BnaA09g39870D/BnaC03g25150D/BnaC04g50140D/BnaC06g18530D/BnaC07g27220D/BnaC08g32220D	12
biological_process	GO:0010260	animal organ senescence	39/5096	179/76374	4.44942e-11	4.59881e-10	2.38624e-10	BnaA01g13360D/BnaA01g14670D/BnaA01g33280D/BnaA02g16660D/BnaA02g19950D/BnaA02g29720D/BnaA03g27640D/BnaA03g58740D/BnaA05g34100D/BnaA06g24140D/BnaA06g31030D/BnaA06g36140D/BnaA07g31170D/BnaA08g14510D/BnaA08g15080D/BnaA09g07120D/BnaA09g17880D/BnaA09g45200D/BnaAnng04720D/BnaC01g15520D/BnaC01g17240D/BnaC02g22570D/BnaC02g23270D/BnaC02g37730D/BnaC02g43620D/BnaC03g49070D/BnaC03g62130D/BnaC05g48600D/BnaC06g…	39
biological_process	GO:0006081	cellular aldehyde metabolic process	13/5096	21/76374	6.26056e-11	6.37766e-10	3.30925e-10	BnaA01g01360D/BnaA03g59170D/BnaA06g01320D/BnaA07g05850D/BnaA08g00900D/BnaA08g15200D/BnaC01g02370D/BnaC03g61970D/BnaC03g78230D/BnaC05g26280D/BnaC06g06890D/BnaC07g46060D/BnaC09g47240D	13
biological_process	GO:0009051	pentose-phosphate shunt, oxidative branch	13/5096	21/76374	6.26056e-11	6.37766e-10	3.30925e-10	BnaA03g04190D/BnaA06g32220D/BnaA07g15160D/BnaA08g30000D/BnaA09g01980D/BnaA10g20180D/BnaC03g05780D/BnaC06g13190D/BnaC07g24170D/BnaC09g01420D/BnaC09g43980D/BnaCnng48180D/BnaCnng78750D	13
cellular_component	GO:0005887	integral component of plasma membrane	42/5096	206/76374	7.69089e-11	7.77879e-10	4.03627e-10	BnaA01g01630D/BnaA01g29190D/BnaA01g36640D/BnaA02g15620D/BnaA02g26600D/BnaA03g35480D/BnaA03g35490D/BnaA03g52810D/BnaA05g19250D/BnaA05g24790D/BnaA06g05900D/BnaA06g15180D/BnaA06g33960D/BnaA07g10320D/BnaA07g23350D/BnaA07g29680D/BnaA08g21340D/BnaA09g09310D/BnaA09g30430D/BnaA09g57200D/BnaAnng08310D/BnaC01g02670D/BnaC01g28090D/BnaC01g32940D/BnaC01g36600D/BnaC02g20830D/BnaC02g34840D/BnaC03g02450D/BnaC03g…	42
cellular_component	GO:0009331	glycerol-3-phosphate dehydrogenase complex	12/5096	18/76374	9.76595e-11	9.80751e-10	5.08894e-10	BnaA03g19520D/BnaA04g10460D/BnaA04g23450D/BnaA05g02270D/BnaA05g29950D/BnaA07g15060D/BnaC03g23410D/BnaC04g01960D/BnaC04g32730D/BnaC04g47330D/BnaC05g44270D/BnaC06g42250D	12
biological_process	GO:0006021	inositol biosynthetic process	10/5096	12/76374	1.01057e-10	1.00772e-09	5.22889e-10	BnaA01g34710D/BnaA02g00400D/BnaA04g12720D/BnaA09g42760D/BnaA10g22070D/BnaC01g00680D/BnaC02g00460D/BnaC04g34650D/BnaC08g35240D/BnaC09g46450D	10
biological_process	GO:0046685	response to arsenic-containing substance	40/5096	193/76374	1.27274e-10	1.26028e-09	6.53937e-10	BnaA01g09720D/BnaA01g29490D/BnaA02g08340D/BnaA02g34120D/BnaA03g00900D/BnaA03g10430D/BnaA03g33290D/BnaA03g43810D/BnaA05g25200D/BnaA05g37440D/BnaA06g05470D/BnaA06g20780D/BnaA06g23380D/BnaA09g48410D/BnaA10g01280D/BnaA10g11110D/BnaA10g22530D/BnaA10g28400D/BnaA10g28410D/BnaAnng20420D/BnaAnng41330D/BnaC01g11410D/BnaC02g48820D/BnaC03g01230D/BnaC03g13120D/BnaC03g38390D/BnaC03g49920D/BnaC03g53290D/BnaC05g…	40
molecular_function	GO:0016157	sucrose synthase activity	16/5096	35/76374	1.7992e-10	1.76921e-09	9.18013e-10	BnaA03g08110D/BnaA05g12940D/BnaA06g29670D/BnaA07g22680D/BnaA07g30830D/BnaA09g00710D/BnaA10g14710D/BnaC02g31640D/BnaC03g10290D/BnaC06g12120D/BnaC06g23590D/BnaC06g34330D/BnaC07g27090D/BnaC09g37040D/BnaCnng23260D/BnaCnng74430D	16
biological_process	GO:0006970	response to osmotic stress	39/5096	188/76374	2.09065e-10	2.04162e-09	1.05936e-09	BnaA02g09580D/BnaA03g08110D/BnaA03g11850D/BnaA03g18970D/BnaA03g24030D/BnaA03g58390D/BnaA04g08220D/BnaA04g13300D/BnaA04g13710D/BnaA05g11750D/BnaA05g34980D/BnaA08g06300D/BnaA10g08330D/BnaA10g14710D/BnaA10g28340D/BnaA10g28860D/BnaA10g29720D/BnaAnng10170D/BnaAnng21790D/BnaAnng37880D/BnaAnng38240D/BnaC01g27790D/BnaC02g44190D/BnaC02g44340D/BnaC03g10290D/BnaC03g14590D/BnaC03g28560D/BnaC03g72510D/BnaC04g…	39
molecular_function	GO:0004614	phosphoglucomutase activity	12/5096	19/76374	2.48823e-10	2.41324e-09	1.25219e-09	BnaA03g06870D/BnaA03g55140D/BnaA08g20600D/BnaA09g30060D/BnaA10g07730D/BnaA10g16760D/BnaC03g08770D/BnaC05g18490D/BnaC08g06210D/BnaC08g06220D/BnaC09g39780D/BnaCnng44490D	12
molecular_function	GO:0005315	inorganic phosphate transmembrane transporter activity	23/5096	75/76374	3.40881e-10	3.28359e-09	1.70379e-09	BnaA01g36280D/BnaA03g15270D/BnaA03g18250D/BnaA04g21000D/BnaA04g21010D/BnaA04g21790D/BnaA04g22280D/BnaA05g06200D/BnaA05g06210D/BnaA05g06230D/BnaAnng10020D/BnaAnng10030D/BnaC01g29930D/BnaC03g18410D/BnaC03g72240D/BnaC04g06470D/BnaC04g06480D/BnaC04g44990D/BnaC04g45640D/BnaC04g46050D/BnaC07g17900D/BnaC08g42000D/BnaCnng61050D	23
biological_process	GO:0005987	sucrose catabolic process	11/5096	16/76374	3.68458e-10	3.52524e-09	1.82919e-09	BnaA03g16550D/BnaA03g24030D/BnaA04g05320D/BnaA05g34980D/BnaA08g06300D/BnaAnng07590D/BnaAnng38240D/BnaC03g19970D/BnaC03g28560D/BnaC04g28060D/BnaC08g06790D	11
biological_process	GO:0015749	monosaccharide transmembrane transport	17/5096	42/76374	5.07364e-10	4.82166e-09	2.50187e-09	BnaA01g36640D/BnaA03g29310D/BnaA03g35480D/BnaA03g35490D/BnaA05g19250D/BnaA05g31350D/BnaA06g06960D/BnaA09g47680D/BnaAnng03010D/BnaC01g28090D/BnaC01g32940D/BnaC03g34490D/BnaC03g41260D/BnaC05g08610D/BnaC05g32770D/BnaC05g45870D/BnaC08g42140D	17
molecular_function	GO:0004650	polygalacturonase activity	43/5096	227/76374	5.30256e-10	5.00562e-09	2.59732e-09	BnaA01g10390D/BnaA02g03420D/BnaA02g12200D/BnaA02g19990D/BnaA03g57500D/BnaA04g25450D/BnaA04g25460D/BnaA05g03600D/BnaA05g23750D/BnaA05g23760D/BnaA07g17330D/BnaA08g28340D/BnaA08g28360D/BnaA08g28370D/BnaA09g36800D/BnaA09g38080D/BnaA10g03840D/BnaA10g17460D/BnaA10g19180D/BnaAnng25080D/BnaAnng36720D/BnaC02g07060D/BnaC02g23310D/BnaC03g39260D/BnaC04g03130D/BnaC04g03160D/BnaC04g03170D/BnaC04g24110D/BnaC04g…	43
molecular_function	GO:0033843	xyloglucan 6-xylosyltransferase activity	14/5096	28/76374	5.58348e-10	5.2359e-09	2.71681e-09	BnaA02g16910D/BnaA02g16920D/BnaA02g16930D/BnaA07g22270D/BnaA07g22280D/BnaA07g31500D/BnaA07g31510D/BnaA10g23440D/BnaC05g14360D/BnaC06g23080D/BnaC06g23090D/BnaC06g35290D/BnaC06g35300D/BnaC09g48110D	14
biological_process	GO:0034605	cellular response to heat	19/5096	53/76374	5.79034e-10	5.39416e-09	2.79893e-09	BnaA01g24440D/BnaA03g22890D/BnaA03g36810D/BnaA05g16860D/BnaA07g10800D/BnaA07g32870D/BnaAnng28960D/BnaAnng29870D/BnaC03g26940D/BnaC05g17200D/BnaC05g29670D/BnaC06g20460D/BnaC06g37420D/BnaC07g14220D/BnaC07g19060D/BnaC08g20020D/BnaCnng14300D/BnaCnng37300D/BnaCnng53960D	19
biological_process	GO:0009911	positive regulation of flower development	35/5096	163/76374	6.4943e-10	6.01042e-09	3.1187e-09	BnaA01g02620D/BnaA01g13990D/BnaA03g02510D/BnaA03g39820D/BnaA03g46830D/BnaA04g19840D/BnaA05g09840D/BnaA07g15600D/BnaA07g33120D/BnaA08g11120D/BnaA08g27870D/BnaA09g05500D/BnaA10g02550D/BnaAnng06140D/BnaAnng06660D/BnaC01g03860D/BnaC01g16480D/BnaC02g01160D/BnaC02g23820D/BnaC02g41870D/BnaC03g03520D/BnaC03g18800D/BnaC03g65970D/BnaC04g14850D/BnaC04g44230D/BnaC05g02520D/BnaC06g13830D/BnaC07g39050D/BnaC07g…	35
biological_process	GO:0019255	glucose 1-phosphate metabolic process	11/5096	17/76374	9.80383e-10	9.01443e-09	4.67742e-09	BnaA03g06870D/BnaA08g20600D/BnaA09g30060D/BnaA10g07730D/BnaA10g16760D/BnaC03g08770D/BnaC05g18490D/BnaC08g06210D/BnaC08g06220D/BnaC09g39780D/BnaCnng44490D	11
cellular_component	GO:0019005	SCF ubiquitin ligase complex	28/5096	113/76374	1.06584e-09	9.73697e-09	5.05234e-09	BnaA01g13250D/BnaA01g13260D/BnaA03g24740D/BnaA03g46050D/BnaA03g56600D/BnaA04g22740D/BnaA04g22750D/BnaA05g05650D/BnaA06g10320D/BnaA07g35640D/BnaA09g21880D/BnaA09g56660D/BnaC01g15070D/BnaC01g15090D/BnaC03g22310D/BnaC03g29350D/BnaC03g44000D/BnaC04g05430D/BnaC04g19600D/BnaC04g46730D/BnaC05g20210D/BnaC05g49760D/BnaC06g40570D/BnaC07g38370D/BnaC09g24130D/BnaCnng42110D/BnaCnng64790D/BnaUnng04040D	28
biological_process	GO:0048574	long-day photoperiodism, flowering	23/5096	79/76374	1.07373e-09	9.74618e-09	5.05711e-09	BnaA03g40160D/BnaA03g55080D/BnaA05g01050D/BnaA10g00780D/BnaA10g26930D/BnaAnng00500D/BnaAnng17890D/BnaC02g03470D/BnaC03g00040D/BnaC03g02480D/BnaC03g02740D/BnaC03g02750D/BnaC04g00590D/BnaC05g00840D/BnaC07g02670D/BnaC07g02690D/BnaC09g05250D/BnaC09g48710D/BnaCnng03230D/BnaCnng43250D/BnaCnng45140D/BnaCnng45150D/BnaCnng45160D	23
molecular_function	GO:0015204	urea transmembrane transporter activity	13/5096	25/76374	1.24059e-09	1.11182e-08	5.76901e-09	BnaA01g28120D/BnaA03g34110D/BnaA05g23460D/BnaA09g51590D/BnaAnng22640D/BnaAnng24130D/BnaC01g44580D/BnaC02g27930D/BnaC03g39560D/BnaC05g37160D/BnaC06g05270D/BnaCnng01570D/BnaCnng24720D	13
molecular_function	GO:0033926	glycopeptide alpha-N-acetylgalactosaminidase activity	13/5096	25/76374	1.24059e-09	1.11182e-08	5.76901e-09	BnaA01g02350D/BnaA03g24030D/BnaA05g30860D/BnaA05g34980D/BnaA08g06300D/BnaA09g41790D/BnaAnng15360D/BnaAnng38240D/BnaC01g03610D/BnaC03g28560D/BnaC03g65720D/BnaC05g45320D/BnaC08g06790D	13
biological_process	GO:0016558	protein import into peroxisome matrix	59/5096	379/76374	1.31017e-09	1.1668e-08	6.05429e-09	BnaA01g25810D/BnaA02g09890D/BnaA03g01150D/BnaA03g34300D/BnaA03g34320D/BnaA03g53180D/BnaA03g57960D/BnaA04g00380D/BnaA04g05950D/BnaA04g10140D/BnaA04g11810D/BnaA04g23670D/BnaA05g23050D/BnaA07g19430D/BnaA08g10870D/BnaA08g23520D/BnaA09g12110D/BnaA09g32260D/BnaA09g32270D/BnaA09g32380D/BnaA09g40130D/BnaA09g53040D/BnaA10g03930D/BnaA10g26130D/BnaAnng00900D/BnaC01g03420D/BnaC01g33010D/BnaC01g44050D/BnaC01g…	59
molecular_function	GO:0004349	glutamate 5-kinase activity	10/5096	14/76374	1.35294e-09	1.19736e-08	6.21286e-09	BnaA03g18760D/BnaA04g03460D/BnaA04g22810D/BnaA05g05760D/BnaA09g35230D/BnaC03g72600D/BnaC04g05620D/BnaC04g46630D/BnaC04g55570D/BnaC08g26550D	10
biological_process	GO:0031408	oxylipin biosynthetic process	30/5096	129/76374	1.42349e-09	1.25196e-08	6.49621e-09	BnaA01g35430D/BnaA02g17050D/BnaA02g26450D/BnaA03g36320D/BnaA03g39650D/BnaA03g41980D/BnaA06g13360D/BnaA06g22280D/BnaA07g21940D/BnaA07g31890D/BnaA08g04610D/BnaA09g06230D/BnaA10g13400D/BnaC01g22400D/BnaC01g24130D/BnaC01g26460D/BnaC02g34570D/BnaC03g42170D/BnaC03g51460D/BnaC05g14920D/BnaC06g22680D/BnaC06g35760D/BnaC07g33090D/BnaC08g46180D/BnaC09g50930D/BnaC09g53990D/BnaC09g54000D/BnaCnng08220D/BnaCnng…	30
biological_process	GO:0006561	proline biosynthetic process	14/5096	30/76374	1.78139e-09	1.55707e-08	8.07935e-09	BnaA03g18760D/BnaA04g03460D/BnaA04g22810D/BnaA05g05760D/BnaA06g36140D/BnaA09g17880D/BnaA09g35230D/BnaC03g72600D/BnaC04g05620D/BnaC04g46630D/BnaC04g55570D/BnaC07g18960D/BnaC08g26550D/BnaC09g19200D	14
biological_process	GO:0006541	glutamine metabolic process	15/5096	35/76374	2.03916e-09	1.77144e-08	9.19169e-09	BnaA02g19000D/BnaA06g09790D/BnaA06g17510D/BnaA06g20540D/BnaA07g34300D/BnaA07g34310D/BnaA09g45270D/BnaC02g25180D/BnaC03g53730D/BnaC03g75390D/BnaC05g11360D/BnaC06g39060D/BnaC06g39080D/BnaC08g39080D/BnaCnng72260D	15
biological_process	GO:0071918	urea transmembrane transport	11/5096	18/76374	2.36752e-09	2.04415e-08	1.06067e-08	BnaA01g28120D/BnaA03g34110D/BnaA05g23460D/BnaA09g51590D/BnaAnng22640D/BnaAnng24130D/BnaC01g44580D/BnaC03g39560D/BnaC05g37160D/BnaCnng01570D/BnaCnng24720D	11
biological_process	GO:0010286	heat acclimation	57/5096	370/76374	3.64194e-09	3.12545e-08	1.62174e-08	BnaA01g26920D/BnaA01g28930D/BnaA02g08820D/BnaA03g03740D/BnaA03g11100D/BnaA03g11140D/BnaA03g22890D/BnaA03g33890D/BnaA03g51560D/BnaA04g13110D/BnaA04g13120D/BnaA05g12840D/BnaA05g24050D/BnaA06g39270D/BnaA07g21330D/BnaA07g32900D/BnaA08g24410D/BnaA08g24420D/BnaA08g24430D/BnaA09g16230D/BnaA09g46660D/BnaA09g47740D/BnaA09g47820D/BnaA09g47970D/BnaA10g14930D/BnaA10g20610D/BnaAnng29550D/BnaAnng37670D/BnaC01g…	57
molecular_function	GO:0004353	glutamate dehydrogenase [NAD(P)+] activity	10/5096	15/76374	3.8136e-09	3.25305e-08	1.68795e-08	BnaA03g02040D/BnaA10g16660D/BnaA10g23880D/BnaAnng13720D/BnaC02g01610D/BnaC03g03050D/BnaC05g31580D/BnaC09g03800D/BnaC09g39680D/BnaC09g47860D	10
molecular_function	GO:0004553	hydrolase activity, hydrolyzing O-glycosyl compounds	67/5096	469/76374	4.00479e-09	3.37546e-08	1.75147e-08	BnaA01g06750D/BnaA01g09070D/BnaA01g15000D/BnaA02g04780D/BnaA02g22470D/BnaA02g26000D/BnaA02g35250D/BnaA02g35330D/BnaA03g43760D/BnaA03g50050D/BnaA04g06280D/BnaA04g10260D/BnaA04g19140D/BnaA05g07860D/BnaA05g10650D/BnaA05g13090D/BnaA05g16360D/BnaA06g34490D/BnaA08g00340D/BnaA08g06970D/BnaA08g07600D/BnaA08g08720D/BnaA08g13110D/BnaA09g00490D/BnaA10g01430D/BnaA10g01440D/BnaA10g11500D/BnaA10g15160D/BnaA10g…	67
biological_process	GO:0015995	chlorophyll biosynthetic process	65/5096	449/76374	3.98141e-09	3.37546e-08	1.75147e-08	BnaA01g16420D/BnaA01g35430D/BnaA02g17050D/BnaA02g26450D/BnaA03g06020D/BnaA03g36320D/BnaA03g41980D/BnaA04g04350D/BnaA06g12880D/BnaA06g13360D/BnaA06g22280D/BnaA06g37230D/BnaA07g21940D/BnaA07g31890D/BnaA08g04610D/BnaA08g16820D/BnaA09g06230D/BnaA09g11320D/BnaA09g11790D/BnaA09g50920D/BnaA10g01960D/BnaA10g13400D/BnaA10g16310D/BnaAnng17190D/BnaAnng17200D/BnaAnng22540D/BnaAnng37450D/BnaAnng40850D/BnaC01g…	65
biological_process	GO:0000272	polysaccharide catabolic process	31/5096	143/76374	4.70108e-09	3.93889e-08	2.04382e-08	BnaA01g13990D/BnaA01g25880D/BnaA02g36650D/BnaA03g07240D/BnaA03g27270D/BnaA03g46830D/BnaA03g53100D/BnaA03g55140D/BnaA05g05170D/BnaA05g07860D/BnaA05g10780D/BnaA05g19350D/BnaA06g02910D/BnaA10g07730D/BnaA10g16290D/BnaAnng07370D/BnaC01g16480D/BnaC01g33070D/BnaC02g31510D/BnaC03g09200D/BnaC03g32270D/BnaC04g04570D/BnaC04g08890D/BnaC04g12480D/BnaC05g32840D/BnaC06g03410D/BnaC06g03450D/BnaC07g39050D/BnaC08g…	31
biological_process	GO:0006995	cellular response to nitrogen starvation	33/5096	159/76374	4.86988e-09	4.05632e-08	2.10475e-08	BnaA01g20470D/BnaA03g47820D/BnaA03g53180D/BnaA06g14510D/BnaA06g14520D/BnaA07g11360D/BnaA07g11370D/BnaA07g11960D/BnaA08g10870D/BnaA08g21730D/BnaA09g12110D/BnaA09g20120D/BnaA09g53040D/BnaC01g03420D/BnaC01g25750D/BnaC03g52880D/BnaC03g65530D/BnaC04g21590D/BnaC05g15970D/BnaC05g15990D/BnaC07g15160D/BnaC07g15270D/BnaC07g15280D/BnaC07g16060D/BnaC07g40090D/BnaC08g19360D/BnaC08g20460D/BnaC08g20470D/BnaC09g…	33
molecular_function	GO:0003997	acyl-CoA oxidase activity	12/5096	23/76374	5.18513e-09	4.29366e-08	2.2279e-08	BnaA04g05950D/BnaA06g24040D/BnaA09g07080D/BnaA09g32380D/BnaA10g28060D/BnaC03g49190D/BnaC04g28570D/BnaC05g04350D/BnaC05g27860D/BnaC08g23150D/BnaC09g06780D/BnaC09g53220D	12
biological_process	GO:0032880	regulation of protein localization	36/5096	185/76374	6.16237e-09	5.07321e-08	2.6324e-08	BnaA01g35430D/BnaA01g37210D/BnaA02g20750D/BnaA03g18970D/BnaA03g19470D/BnaA03g36320D/BnaA03g41980D/BnaA04g01120D/BnaA04g12000D/BnaA04g23920D/BnaA05g04720D/BnaA05g25660D/BnaA07g18800D/BnaA09g01040D/BnaA09g38720D/BnaA09g43380D/BnaAnng26460D/BnaC01g22400D/BnaC01g37460D/BnaC02g27240D/BnaC03g23350D/BnaC03g30720D/BnaC03g42170D/BnaC03g70780D/BnaC03g72510D/BnaC04g22010D/BnaC04g33690D/BnaC04g47680D/BnaC05g…	36
molecular_function	GO:0051287	NAD binding	39/5096	212/76374	7.71821e-09	6.31733e-08	3.27795e-08	BnaA01g33660D/BnaA02g12320D/BnaA03g04970D/BnaA03g19520D/BnaA04g09140D/BnaA04g10460D/BnaA04g23450D/BnaA05g02270D/BnaA05g29950D/BnaA05g33200D/BnaA06g04670D/BnaA06g30860D/BnaA07g14670D/BnaA07g15060D/BnaA07g17800D/BnaA07g20300D/BnaA07g25510D/BnaA08g04610D/BnaA08g27100D/BnaAnng08060D/BnaAnng25850D/BnaC01g40210D/BnaC02g25850D/BnaC03g06570D/BnaC03g23410D/BnaC04g01960D/BnaC04g32730D/BnaC04g47330D/BnaC05g…	39
biological_process	GO:0009108	coenzyme biosynthetic process	34/5096	170/76374	7.77249e-09	6.3252e-08	3.28203e-08	BnaA01g35430D/BnaA02g17050D/BnaA02g26450D/BnaA03g36320D/BnaA03g41980D/BnaA06g13360D/BnaA06g22280D/BnaA06g37230D/BnaA07g21940D/BnaA07g31890D/BnaA08g16820D/BnaA09g06230D/BnaA10g13400D/BnaAnng40850D/BnaC01g00070D/BnaC01g17340D/BnaC01g22400D/BnaC01g26460D/BnaC02g34570D/BnaC03g42170D/BnaC03g51460D/BnaC03g60280D/BnaC03g76450D/BnaC04g44410D/BnaC05g14920D/BnaC06g22680D/BnaC06g35760D/BnaC07g33090D/BnaC07g…	34
biological_process	GO:0031117	positive regulation of microtubule depolymerization	10/5096	16/76374	9.55551e-09	7.60146e-08	3.94426e-08	BnaA01g35060D/BnaA03g44480D/BnaA09g17180D/BnaC02g47470D/BnaC07g18150D/BnaC07g36310D/BnaC09g18360D/BnaCnng39720D/BnaCnng39730D/BnaCnng39740D	10
biological_process	GO:0035865	cellular response to potassium ion	10/5096	16/76374	9.55551e-09	7.60146e-08	3.94426e-08	BnaA01g35060D/BnaA03g44480D/BnaA09g17180D/BnaC02g47470D/BnaC07g18150D/BnaC07g36310D/BnaC09g18360D/BnaCnng39720D/BnaCnng39730D/BnaCnng39740D	10
molecular_function	GO:0043325	phosphatidylinositol-3,4-bisphosphate binding	10/5096	16/76374	9.55551e-09	7.60146e-08	3.94426e-08	BnaA01g35060D/BnaA03g44480D/BnaA09g17180D/BnaC02g47470D/BnaC07g18150D/BnaC07g36310D/BnaC09g18360D/BnaCnng39720D/BnaCnng39730D/BnaCnng39740D	10
biological_process	GO:0051592	response to calcium ion	10/5096	16/76374	9.55551e-09	7.60146e-08	3.94426e-08	BnaA01g35060D/BnaA03g44480D/BnaA09g17180D/BnaC02g47470D/BnaC07g18150D/BnaC07g36310D/BnaC09g18360D/BnaCnng39720D/BnaCnng39730D/BnaCnng39740D	10
biological_process	GO:0009740	gibberellic acid mediated signaling pathway	48/5096	295/76374	1.02951e-08	8.1441e-08	4.22582e-08	BnaA01g01970D/BnaA01g06750D/BnaA01g14670D/BnaA01g32360D/BnaA02g00920D/BnaA02g22470D/BnaA03g26050D/BnaA03g27440D/BnaA03g50050D/BnaA03g53310D/BnaA04g00900D/BnaA05g30290D/BnaA05g33770D/BnaA06g31880D/BnaA06g39070D/BnaA07g18900D/BnaA07g34940D/BnaA09g01090D/BnaA09g02150D/BnaA09g35800D/BnaA09g45200D/BnaA10g21200D/BnaAnng04000D/BnaAnng17260D/BnaAnng22640D/BnaAnng23050D/BnaAnng24130D/BnaC01g03110D/BnaC01g…	48
biological_process	GO:0009061	anaerobic respiration	16/5096	44/76374	1.03536e-08	8.14479e-08	4.22619e-08	BnaA03g30440D/BnaA05g11040D/BnaA09g07110D/BnaAnng04700D/BnaAnng16530D/BnaC02g26900D/BnaC02g26920D/BnaC02g43600D/BnaC03g49100D/BnaC03g73280D/BnaC04g12730D/BnaC04g12740D/BnaC05g43010D/BnaC08g31580D/BnaC09g06820D/BnaC09g46650D	16
molecular_function	GO:0016229	steroid dehydrogenase activity	11/5096	20/76374	1.10213e-08	8.57478e-08	4.4493e-08	BnaA05g06790D/BnaA05g06800D/BnaA05g34880D/BnaA09g54910D/BnaAnng30320D/BnaC04g53460D/BnaC04g53480D/BnaC04g53550D/BnaC04g53560D/BnaC04g53580D/BnaC08g24860D	11
molecular_function	GO:0070401	NADP+ binding	11/5096	20/76374	1.10213e-08	8.57478e-08	4.4493e-08	BnaA05g06790D/BnaA05g06800D/BnaA05g34880D/BnaA09g54910D/BnaAnng30320D/BnaC04g53460D/BnaC04g53480D/BnaC04g53550D/BnaC04g53560D/BnaC04g53580D/BnaC08g24860D	11
molecular_function	GO:0008017	microtubule binding	52/5096	334/76374	1.19636e-08	9.25708e-08	4.80333e-08	BnaA01g16240D/BnaA01g17220D/BnaA01g35060D/BnaA03g02940D/BnaA03g07280D/BnaA03g20700D/BnaA03g21090D/BnaA03g27770D/BnaA03g42660D/BnaA03g44480D/BnaA03g59770D/BnaA04g25600D/BnaA05g03800D/BnaA06g06280D/BnaA06g21560D/BnaA06g24330D/BnaA07g15990D/BnaA07g38000D/BnaA09g17180D/BnaA09g19860D/BnaA09g33460D/BnaA10g16260D/BnaAnng16850D/BnaAnng27580D/BnaAnng39950D/BnaC01g19340D/BnaC01g19720D/BnaC02g47470D/BnaC03g…	52
molecular_function	GO:0002161	aminoacyl-tRNA editing activity	14/5096	34/76374	1.32118e-08	1.01674e-07	5.27567e-08	BnaA03g25380D/BnaA03g25410D/BnaA03g45240D/BnaA03g45250D/BnaA04g11450D/BnaA09g48390D/BnaC03g29830D/BnaC06g41300D/BnaC07g37200D/BnaC07g37210D/BnaC07g37220D/BnaC08g13740D/BnaC08g42640D/BnaCnng19820D	14
biological_process	GO:0009106	lipoate metabolic process	34/5096	174/76374	1.43644e-08	1.09946e-07	5.70491e-08	BnaA01g35430D/BnaA02g17050D/BnaA02g26450D/BnaA03g36320D/BnaA03g41980D/BnaA06g13360D/BnaA06g22280D/BnaA06g37230D/BnaA07g21940D/BnaA07g31890D/BnaA08g16820D/BnaA09g06230D/BnaA10g13400D/BnaAnng40850D/BnaC01g00070D/BnaC01g17340D/BnaC01g22400D/BnaC01g26460D/BnaC02g34570D/BnaC03g42170D/BnaC03g51460D/BnaC03g60280D/BnaC03g76450D/BnaC04g44410D/BnaC05g14920D/BnaC06g22680D/BnaC06g35760D/BnaC07g33090D/BnaC07g…	34
molecular_function	GO:0004315	3-oxoacyl-[acyl-carrier-protein] synthase activity	9/5096	13/76374	1.45445e-08	1.10134e-07	5.71466e-08	BnaA02g17050D/BnaA06g13360D/BnaA07g21940D/BnaA07g31890D/BnaC01g26460D/BnaC05g14920D/BnaC06g22680D/BnaC06g35760D/BnaCnng08220D	9
molecular_function	GO:0047274	galactinol-sucrose galactosyltransferase activity	9/5096	13/76374	1.45445e-08	1.10134e-07	5.71466e-08	BnaA04g10260D/BnaA08g00340D/BnaA09g36810D/BnaC03g70760D/BnaC03g70770D/BnaC04g55490D/BnaC04g56100D/BnaC08g28500D/BnaCnng07360D	9
biological_process	GO:0009226	nucleotide-sugar biosynthetic process	8/5096	10/76374	1.55686e-08	1.16027e-07	6.02043e-08	BnaA06g04670D/BnaA08g27100D/BnaA09g40940D/BnaA09g48990D/BnaC05g05890D/BnaC08g02460D/BnaC08g33440D/BnaC08g43300D	8
biological_process	GO:0071490	cellular response to far red light	8/5096	10/76374	1.55686e-08	1.16027e-07	6.02043e-08	BnaA01g24440D/BnaA03g36810D/BnaA05g16860D/BnaC05g29670D/BnaC06g20460D/BnaCnng14300D/BnaCnng37300D/BnaCnng53960D	8
biological_process	GO:0071491	cellular response to red light	8/5096	10/76374	1.55686e-08	1.16027e-07	6.02043e-08	BnaA01g24440D/BnaA03g36810D/BnaA05g16860D/BnaC05g29670D/BnaC06g20460D/BnaCnng14300D/BnaCnng37300D/BnaCnng53960D	8
molecular_function	GO:0003995	acyl-CoA dehydrogenase activity	12/5096	25/76374	1.75774e-08	1.30312e-07	6.76164e-08	BnaA03g59250D/BnaA04g05950D/BnaA06g24040D/BnaA09g07080D/BnaA09g32380D/BnaA10g28060D/BnaC03g49190D/BnaC04g28570D/BnaC05g04350D/BnaC05g27860D/BnaC08g23150D/BnaC09g06780D	12
molecular_function	GO:0044212	transcription regulatory region DNA binding	21/5096	77/76374	2.02882e-08	1.49625e-07	7.76378e-08	BnaA01g24900D/BnaA03g18970D/BnaA03g40160D/BnaA09g46770D/BnaA10g00780D/BnaAnng17890D/BnaC03g00040D/BnaC03g72510D/BnaC05g00840D/BnaC07g02670D/BnaC07g02690D/BnaC08g40840D/BnaC09g05250D/BnaCnng27900D/BnaCnng43250D/BnaCnng45140D/BnaCnng45150D/BnaCnng45160D/BnaCnng47800D/BnaCnng69170D/BnaCnng69180D	21
molecular_function	GO:0004784	superoxide dismutase activity	13/5096	30/76374	2.07993e-08	1.526e-07	7.91816e-08	BnaA04g16310D/BnaA06g05150D/BnaA09g35800D/BnaA09g39580D/BnaA09g48720D/BnaA10g16720D/BnaC03g51730D/BnaC04g39580D/BnaC05g06430D/BnaC08g27300D/BnaC08g31950D/BnaC08g42970D/BnaC09g39740D	13
biological_process	GO:0003006	developmental process involved in reproduction	10/5096	17/76374	2.18057e-08	1.59159e-07	8.25848e-08	BnaA01g33280D/BnaA02g29720D/BnaA03g27640D/BnaA03g44390D/BnaA05g34100D/BnaA06g31030D/BnaC02g37730D/BnaC05g48600D/BnaC07g25610D/BnaCnng29110D	10
biological_process	GO:0000160	phosphorelay signal transduction system	31/5096	153/76374	2.53299e-08	1.83934e-07	9.54399e-08	BnaA02g06500D/BnaA03g34320D/BnaA03g40160D/BnaA04g26750D/BnaA05g01090D/BnaA05g23050D/BnaA06g05470D/BnaA06g34070D/BnaA07g24890D/BnaA07g26610D/BnaA07g36310D/BnaA09g48410D/BnaA10g12930D/BnaA10g26930D/BnaAnng00500D/BnaC01g44050D/BnaC02g03470D/BnaC03g39750D/BnaC04g00640D/BnaC04g51630D/BnaC05g36490D/BnaC06g26570D/BnaC06g28780D/BnaC07g21830D/BnaC08g42660D/BnaC09g05250D/BnaC09g35410D/BnaCnng03230D/BnaCnng…	31
biological_process	GO:0006450	regulation of translational fidelity	14/5096	36/76374	3.17213e-08	2.28806e-07	1.18723e-07	BnaA03g25380D/BnaA03g25410D/BnaA03g45240D/BnaA03g45250D/BnaA04g11450D/BnaA09g48390D/BnaC03g29830D/BnaC06g41300D/BnaC07g37200D/BnaC07g37210D/BnaC07g37220D/BnaC08g13740D/BnaC08g42640D/BnaCnng19820D	14
biological_process	GO:0007623	circadian rhythm	67/5096	494/76374	3.18324e-08	2.28806e-07	1.18723e-07	BnaA01g12740D/BnaA03g19240D/BnaA03g25680D/BnaA03g35190D/BnaA03g45660D/BnaA03g57390D/BnaA04g00900D/BnaA04g05650D/BnaA04g06460D/BnaA04g15260D/BnaA04g26750D/BnaA05g01090D/BnaA05g01890D/BnaA05g30860D/BnaA05g31200D/BnaA06g05470D/BnaA06g16600D/BnaA07g18900D/BnaA07g27460D/BnaA07g28350D/BnaA08g25580D/BnaA09g00970D/BnaA09g01520D/BnaA09g01530D/BnaA09g13310D/BnaA09g32630D/BnaA09g32650D/BnaA09g40710D/BnaA09g…	67
cellular_component	GO:0000152	nuclear ubiquitin ligase complex	9/5096	14/76374	3.82894e-08	2.73828e-07	1.42084e-07	BnaA01g33280D/BnaA02g29720D/BnaA03g27640D/BnaA05g34100D/BnaA06g31030D/BnaC02g37730D/BnaC05g48600D/BnaC07g25610D/BnaCnng29110D	9
biological_process	GO:0010192	mucilage biosynthetic process	10/5096	18/76374	4.61034e-08	3.28052e-07	1.70221e-07	BnaA02g34360D/BnaA03g55860D/BnaA06g23700D/BnaA09g06990D/BnaC02g43280D/BnaC03g03990D/BnaC03g49550D/BnaC03g60510D/BnaC04g55050D/BnaC09g06600D	10
molecular_function	GO:0047216	inositol 3-alpha-galactosyltransferase activity	8/5096	11/76374	5.37094e-08	3.80262e-07	1.97311e-07	BnaA04g26930D/BnaA05g00720D/BnaA09g15290D/BnaA09g48480D/BnaC04g00330D/BnaC04g51460D/BnaC08g50010D/BnaCnng63310D	8
biological_process	GO:0006766	vitamin metabolic process	34/5096	184/76374	6.0695e-08	4.27583e-07	2.21865e-07	BnaA01g35430D/BnaA02g17050D/BnaA02g26450D/BnaA03g36320D/BnaA03g41980D/BnaA06g13360D/BnaA06g22280D/BnaA06g37230D/BnaA07g21940D/BnaA07g31890D/BnaA08g16820D/BnaA09g06230D/BnaA10g13400D/BnaAnng40850D/BnaC01g00070D/BnaC01g17340D/BnaC01g22400D/BnaC01g26460D/BnaC02g34570D/BnaC03g42170D/BnaC03g51460D/BnaC03g60280D/BnaC03g76450D/BnaC04g44410D/BnaC05g14920D/BnaC06g22680D/BnaC06g35760D/BnaC07g33090D/BnaC07g…	34
biological_process	GO:0009631	cold acclimation	25/5096	111/76374	6.3225e-08	4.43201e-07	2.29969e-07	BnaA01g01560D/BnaA01g07170D/BnaA02g17050D/BnaA05g18680D/BnaA06g13360D/BnaA07g21940D/BnaA07g31890D/BnaA08g04640D/BnaA08g25580D/BnaA09g47750D/BnaA10g08890D/BnaAnng08360D/BnaAnng25950D/BnaAnng29790D/BnaC01g08650D/BnaC01g26460D/BnaC05g14920D/BnaC06g00520D/BnaC06g22680D/BnaC06g35760D/BnaC08g14540D/BnaC08g49610D/BnaC09g25820D/BnaCnng08220D/BnaCnng21000D	25
molecular_function	GO:0004029	aldehyde dehydrogenase (NAD+) activity	13/5096	33/76374	8.23056e-08	5.74112e-07	2.97896e-07	BnaA01g01360D/BnaA03g59170D/BnaA06g01320D/BnaA07g05850D/BnaA08g00900D/BnaA08g15200D/BnaC01g02370D/BnaC03g61970D/BnaC03g78230D/BnaC05g26280D/BnaC06g06890D/BnaC07g46060D/BnaC09g47240D	13
molecular_function	GO:0004802	transketolase activity	9/5096	15/76374	9.00032e-08	6.21681e-07	3.22579e-07	BnaA04g01120D/BnaA05g04720D/BnaA07g18800D/BnaA09g38720D/BnaAnng26460D/BnaC04g22010D/BnaC05g15760D/BnaC08g30890D/BnaCnng31120D	9
biological_process	GO:0006617	SRP-dependent cotranslational protein targeting to membrane, signal sequence recognition	9/5096	15/76374	9.00032e-08	6.21681e-07	3.22579e-07	BnaA05g17060D/BnaA06g03460D/BnaA06g09990D/BnaA08g02950D/BnaC02g29710D/BnaC05g11610D/BnaC05g25860D/BnaC06g02320D/BnaC08g03210D	9
cellular_component	GO:0000139	Golgi membrane	24/5096	107/76374	1.24938e-07	8.588e-07	4.45616e-07	BnaA02g16910D/BnaA02g16920D/BnaA02g16930D/BnaA03g54300D/BnaA04g01650D/BnaA06g32030D/BnaA07g22270D/BnaA07g22280D/BnaA07g31500D/BnaA07g31510D/BnaA09g37700D/BnaA10g23440D/BnaC02g36970D/BnaC04g23090D/BnaC05g14360D/BnaC06g23080D/BnaC06g23090D/BnaC06g35290D/BnaC06g35300D/BnaC07g24450D/BnaC08g48850D/BnaC09g48110D/BnaCnng51850D/BnaCnng51860D	24
biological_process	GO:0080086	stamen filament development	11/5096	24/76374	1.27476e-07	8.72011e-07	4.52471e-07	BnaA02g26000D/BnaA03g27440D/BnaA05g33770D/BnaA06g31880D/BnaA09g02150D/BnaAnng35740D/BnaC02g34110D/BnaC03g32460D/BnaC05g48910D/BnaC07g24710D/BnaC09g01550D	11
cellular_component	GO:0042807	central vacuole	12/5096	29/76374	1.36313e-07	9.27975e-07	4.81509e-07	BnaA01g28120D/BnaA03g34110D/BnaA04g15110D/BnaA05g23460D/BnaAnng22640D/BnaAnng24130D/BnaC01g44580D/BnaC03g39560D/BnaC04g38040D/BnaC05g37160D/BnaC06g05270D/BnaCnng24720D	12
molecular_function	GO:0004824	lysine-tRNA ligase activity	8/5096	12/76374	1.51608e-07	1.01743e-06	5.27924e-07	BnaA03g31900D/BnaA05g27370D/BnaA10g30390D/BnaAnng09520D/BnaAnng09530D/BnaC03g73420D/BnaC05g41490D/BnaC09g49130D	8
biological_process	GO:0006430	lysyl-tRNA aminoacylation	8/5096	12/76374	1.51608e-07	1.01743e-06	5.27924e-07	BnaA03g31900D/BnaA05g27370D/BnaA10g30390D/BnaAnng09520D/BnaAnng09530D/BnaC03g73420D/BnaC05g41490D/BnaC09g49130D	8
biological_process	GO:0006572	tyrosine catabolic process	8/5096	12/76374	1.51608e-07	1.01743e-06	5.27924e-07	BnaA02g09890D/BnaA05g12790D/BnaA09g43670D/BnaA10g07180D/BnaC02g13840D/BnaC06g11940D/BnaC08g36300D/BnaCnng14590D	8
biological_process	GO:0010082	regulation of root meristem growth	19/5096	72/76374	1.67458e-07	1.11849e-06	5.80364e-07	BnaA03g34300D/BnaA03g34320D/BnaA05g23050D/BnaA06g18830D/BnaA07g24890D/BnaA07g26610D/BnaA08g04370D/BnaA10g27860D/BnaC01g44050D/BnaC01g44060D/BnaC03g39750D/BnaC03g54740D/BnaC05g36490D/BnaC06g00930D/BnaC06g26570D/BnaC06g28780D/BnaC08g46630D/BnaCnng27490D/BnaCnng27500D	19
biological_process	GO:0042752	regulation of circadian rhythm	28/5096	141/76374	1.8225e-07	1.21158e-06	6.28665e-07	BnaA02g06500D/BnaA02g30480D/BnaA03g40160D/BnaA03g56600D/BnaA04g22740D/BnaA04g22750D/BnaA05g05650D/BnaA05g20100D/BnaA06g39620D/BnaA09g03180D/BnaA10g12930D/BnaA10g26930D/BnaAnng00500D/BnaC02g03470D/BnaC02g38810D/BnaC03g22310D/BnaC03g41750D/BnaC03g41760D/BnaC04g05430D/BnaC04g19600D/BnaC04g46730D/BnaC05g31460D/BnaC07g26830D/BnaC09g02610D/BnaC09g05250D/BnaC09g35410D/BnaCnng03230D/BnaCnng43250D	28
biological_process	GO:0019287	isopentenyl diphosphate biosynthetic process, mevalonate pathway	9/5096	16/76374	1.93436e-07	1.27993e-06	6.64133e-07	BnaA02g21580D/BnaA07g32810D/BnaA09g21330D/BnaAnng37030D/BnaC02g24100D/BnaC06g37290D/BnaC09g23740D/BnaCnng23810D/BnaCnng45000D	9
biological_process	GO:0051049	regulation of transport	18/5096	66/76374	2.04331e-07	1.34574e-06	6.98278e-07	BnaA01g33660D/BnaA02g12320D/BnaA03g22030D/BnaA04g16730D/BnaA05g33200D/BnaA07g14360D/BnaA07g25510D/BnaAnng25840D/BnaAnng25850D/BnaC01g40210D/BnaC02g17340D/BnaC02g24620D/BnaC03g26400D/BnaC04g15350D/BnaC04g40090D/BnaC05g47450D/BnaC06g27300D/BnaCnng36970D	18
biological_process	GO:0010380	regulation of chlorophyll biosynthetic process	19/5096	73/76374	2.12219e-07	1.39121e-06	7.21876e-07	BnaA01g24440D/BnaA03g13420D/BnaA03g34300D/BnaA03g34320D/BnaA03g36810D/BnaA05g16860D/BnaA05g23050D/BnaC01g44050D/BnaC01g44060D/BnaC03g16230D/BnaC03g39750D/BnaC05g29670D/BnaC05g36490D/BnaC06g20460D/BnaCnng14300D/BnaCnng27490D/BnaCnng27500D/BnaCnng37300D/BnaCnng53960D	19
biological_process	GO:0006546	glycine catabolic process	38/5096	231/76374	2.4938e-07	1.62729e-06	8.44373e-07	BnaA01g35430D/BnaA02g17050D/BnaA02g26450D/BnaA03g36320D/BnaA03g41980D/BnaA04g12000D/BnaA06g13360D/BnaA06g22280D/BnaA06g37230D/BnaA07g21940D/BnaA07g31890D/BnaA08g16820D/BnaA09g06230D/BnaA09g43380D/BnaA10g13400D/BnaAnng40850D/BnaC01g00070D/BnaC01g17340D/BnaC01g22400D/BnaC01g26460D/BnaC02g34570D/BnaC03g42170D/BnaC03g51460D/BnaC03g60280D/BnaC03g76450D/BnaC04g33690D/BnaC04g44410D/BnaC05g14920D/BnaC06g…	38
biological_process	GO:0045039	protein insertion into mitochondrial inner membrane	10/5096	21/76374	3.08416e-07	2.00329e-06	1.03947e-06	BnaA03g13520D/BnaA03g59590D/BnaA07g21840D/BnaA09g13040D/BnaC01g16880D/BnaC03g16400D/BnaC04g19910D/BnaC06g22550D/BnaC06g35930D/BnaUnng03640D	10
biological_process	GO:0010118	stomatal movement	32/5096	179/76374	3.19227e-07	2.06404e-06	1.07099e-06	BnaA01g35090D/BnaA03g46410D/BnaA03g56600D/BnaA04g22740D/BnaA04g22750D/BnaA05g05650D/BnaA05g29640D/BnaA07g07410D/BnaA08g17440D/BnaA08g26140D/BnaA08g27870D/BnaA09g26270D/BnaA10g02550D/BnaAnng13370D/BnaC01g15850D/BnaC02g40240D/BnaC03g22310D/BnaC03g76090D/BnaC03g76100D/BnaC03g76160D/BnaC04g05430D/BnaC04g19600D/BnaC04g41780D/BnaC04g46730D/BnaC05g02520D/BnaC05g43970D/BnaC07g09070D/BnaC07g38670D/BnaC08g…	32
biological_process	GO:0042754	negative regulation of circadian rhythm	11/5096	26/76374	3.48155e-07	2.23071e-06	1.15748e-06	BnaA05g01050D/BnaA10g00780D/BnaAnng17890D/BnaC03g00040D/BnaC04g00590D/BnaC05g00840D/BnaC07g02670D/BnaC07g02690D/BnaCnng45140D/BnaCnng45150D/BnaCnng45160D	11
molecular_function	GO:0046556	alpha-L-arabinofuranosidase activity	11/5096	26/76374	3.48155e-07	2.23071e-06	1.15748e-06	BnaA01g31470D/BnaA02g30740D/BnaA02g30890D/BnaA03g31380D/BnaA09g03310D/BnaC02g39030D/BnaC02g39150D/BnaC03g36760D/BnaC07g27160D/BnaC09g02680D/BnaC09g30790D	11
molecular_function	GO:0004557	alpha-galactosidase activity	8/5096	13/76374	3.70909e-07	2.35519e-06	1.22207e-06	BnaA03g02510D/BnaAnng06130D/BnaAnng06140D/BnaC02g01150D/BnaC02g01160D/BnaC03g03520D/BnaC03g03530D/BnaCnng62740D	8
biological_process	GO:0046477	glycosylceramide catabolic process	8/5096	13/76374	3.70909e-07	2.35519e-06	1.22207e-06	BnaA03g02510D/BnaAnng06130D/BnaAnng06140D/BnaC02g01150D/BnaC02g01160D/BnaC03g03520D/BnaC03g03530D/BnaCnng62740D	8
molecular_function	GO:0004030	aldehyde dehydrogenase [NAD(P)+] activity	9/5096	17/76374	3.8652e-07	2.42174e-06	1.25659e-06	BnaA01g01360D/BnaA03g59170D/BnaA07g05850D/BnaA08g15200D/BnaC01g02370D/BnaC03g61970D/BnaC05g26280D/BnaC07g46060D/BnaC09g47240D	9
biological_process	GO:0045876	positive regulation of sister chromatid cohesion	9/5096	17/76374	3.8652e-07	2.42174e-06	1.25659e-06	BnaA01g12740D/BnaA03g45660D/BnaC01g14470D/BnaC04g05300D/BnaC07g37760D/BnaCnng23110D/BnaCnng55190D/BnaCnng59290D/BnaCnng76590D	9
biological_process	GO:0051307	meiotic chromosome separation	9/5096	17/76374	3.8652e-07	2.42174e-06	1.25659e-06	BnaA01g12740D/BnaA03g45660D/BnaC01g14470D/BnaC04g05300D/BnaC07g37760D/BnaCnng23110D/BnaCnng55190D/BnaCnng59290D/BnaCnng76590D	9
cellular_component	GO:0009705	plant-type vacuole membrane	51/5096	364/76374	4.8652e-07	3.03486e-06	1.57473e-06	BnaA01g19370D/BnaA01g28120D/BnaA02g35880D/BnaA03g20290D/BnaA03g34110D/BnaA03g53180D/BnaA04g11860D/BnaA04g15110D/BnaA04g25030D/BnaA05g03260D/BnaA05g03420D/BnaA05g23460D/BnaA06g13580D/BnaA06g13670D/BnaA07g15180D/BnaA07g21790D/BnaA07g31980D/BnaA08g10550D/BnaA08g10870D/BnaA08g29490D/BnaA09g12110D/BnaA09g15940D/BnaA09g44150D/BnaA09g53040D/BnaAnng04430D/BnaAnng22640D/BnaAnng24130D/BnaAnng38010D/BnaC01g…	51
molecular_function	GO:0004739	pyruvate dehydrogenase (acetyl-transferring) activity	12/5096	32/76374	4.9102e-07	3.0495e-06	1.58233e-06	BnaA07g09080D/BnaA07g28560D/BnaA09g29700D/BnaA09g51510D/BnaA10g00730D/BnaC05g00810D/BnaC05g19320D/BnaC06g31170D/BnaC07g12860D/BnaC08g45650D/BnaC08g45660D/BnaC08g46110D	12
biological_process	GO:0010218	response to far red light	54/5096	396/76374	5.45843e-07	3.37517e-06	1.75131e-06	BnaA02g00920D/BnaA02g29010D/BnaA03g37990D/BnaA03g39650D/BnaA03g56600D/BnaA04g04350D/BnaA04g07450D/BnaA04g22740D/BnaA04g22750D/BnaA05g05650D/BnaA06g30310D/BnaA06g31910D/BnaA07g12950D/BnaA08g04610D/BnaA08g29950D/BnaA09g02120D/BnaA09g11320D/BnaA09g11790D/BnaA10g13400D/BnaA10g15850D/BnaA10g21200D/BnaAnng08760D/BnaAnng17190D/BnaAnng17200D/BnaC01g24130D/BnaC02g08620D/BnaC02g17140D/BnaC02g17150D/BnaC02g…	54
biological_process	GO:0009739	response to gibberellin	52/5096	376/76374	5.67192e-07	3.49193e-06	1.8119e-06	BnaA01g00360D/BnaA01g19130D/BnaA02g15320D/BnaA02g17000D/BnaA02g25380D/BnaA03g12550D/BnaA03g19400D/BnaA03g43060D/BnaA03g54130D/BnaA05g01050D/BnaA05g02120D/BnaA06g37740D/BnaA07g11930D/BnaA07g22130D/BnaA07g29070D/BnaA07g31680D/BnaA07g31770D/BnaA08g22290D/BnaA09g18280D/BnaA09g44370D/BnaA10g00780D/BnaA10g28420D/BnaAnng15540D/BnaAnng17890D/BnaC01g16860D/BnaC01g21010D/BnaC01g22960D/BnaC01g33300D/BnaC02g…	52
cellular_component	GO:0005652	nuclear lamina	7/5096	10/76374	5.87897e-07	3.5728e-06	1.85386e-06	BnaA02g12980D/BnaA02g12990D/BnaA07g26250D/BnaA07g38730D/BnaA07g38740D/BnaC02g17300D/BnaC06g28300D	7
biological_process	GO:0035195	gene silencing by miRNA	7/5096	10/76374	5.87897e-07	3.5728e-06	1.85386e-06	BnaA04g16310D/BnaA06g05150D/BnaA09g48720D/BnaC03g51730D/BnaC04g39580D/BnaC05g06430D/BnaC08g42970D	7
biological_process	GO:0071484	cellular response to light intensity	7/5096	10/76374	5.87897e-07	3.5728e-06	1.85386e-06	BnaA04g16310D/BnaA06g05150D/BnaA09g48720D/BnaC03g51730D/BnaC04g39580D/BnaC05g06430D/BnaC08g42970D	7
biological_process	GO:0010182	sugar mediated signaling pathway	63/5096	493/76374	6.68098e-07	4.04285e-06	2.09776e-06	BnaA01g12740D/BnaA01g33280D/BnaA01g36840D/BnaA02g01670D/BnaA02g18920D/BnaA02g18930D/BnaA02g29720D/BnaA03g04360D/BnaA03g26370D/BnaA03g27640D/BnaA03g35930D/BnaA03g45660D/BnaA04g04810D/BnaA05g20140D/BnaA05g20160D/BnaA05g34100D/BnaA06g16600D/BnaA06g18830D/BnaA06g29500D/BnaA06g31030D/BnaA06g40930D/BnaA07g34230D/BnaA08g02070D/BnaA08g19390D/BnaA08g19400D/BnaA09g00540D/BnaA09g03330D/BnaA09g28460D/BnaA09g…	63
molecular_function	GO:0004749	ribose phosphate diphosphokinase activity	8/5096	14/76374	8.14402e-07	4.88641e-06	2.53547e-06	BnaA04g25770D/BnaA05g08630D/BnaA09g24370D/BnaC04g09710D/BnaC04g49680D/BnaC05g24530D/BnaC05g28770D/BnaCnng60440D	8
biological_process	GO:0043617	cellular response to sucrose starvation	8/5096	14/76374	8.14402e-07	4.88641e-06	2.53547e-06	BnaA01g32560D/BnaA03g29700D/BnaA06g17510D/BnaA06g20540D/BnaC03g34940D/BnaC03g53730D/BnaC03g75390D/BnaCnng72260D	8
biological_process	GO:0032258	cytoplasm to vacuole transport by the Cvt pathway	11/5096	28/76374	8.5395e-07	5.10208e-06	2.64738e-06	BnaA01g17220D/BnaA03g21090D/BnaA03g42660D/BnaA03g59770D/BnaA07g38000D/BnaAnng27580D/BnaC01g19720D/BnaC03g25150D/BnaC04g19210D/BnaC07g33760D/BnaC08g47980D	11
molecular_function	GO:0016984	ribulose-bisphosphate carboxylase activity	10/5096	23/76374	8.83625e-07	5.2352e-06	2.71645e-06	BnaA02g12810D/BnaA02g12840D/BnaA04g08570D/BnaA04g08640D/BnaAnng36210D/BnaC02g17140D/BnaC02g17150D/BnaC02g17180D/BnaC04g30810D/BnaC04g30870D	10
biological_process	GO:0071219	cellular response to molecule of bacterial origin	10/5096	23/76374	8.83625e-07	5.2352e-06	2.71645e-06	BnaA01g35060D/BnaA03g44480D/BnaA09g17180D/BnaC02g47470D/BnaC07g18150D/BnaC07g36310D/BnaC09g18360D/BnaCnng39720D/BnaCnng39730D/BnaCnng39740D	10
biological_process	GO:0009637	response to blue light	54/5096	404/76374	1.02198e-06	6.0297e-06	3.1287e-06	BnaA02g08340D/BnaA02g29010D/BnaA03g10430D/BnaA03g37990D/BnaA03g39650D/BnaA04g04350D/BnaA04g07450D/BnaA05g33840D/BnaA06g30310D/BnaA06g31910D/BnaA07g12950D/BnaA08g04610D/BnaA08g29950D/BnaA08g30000D/BnaA09g02120D/BnaA09g11320D/BnaA09g11790D/BnaA10g11110D/BnaA10g13400D/BnaA10g15850D/BnaAnng08760D/BnaAnng17190D/BnaAnng17200D/BnaC01g24130D/BnaC02g08620D/BnaC02g17140D/BnaC02g17150D/BnaC02g37040D/BnaC03g…	54
molecular_function	GO:0015114	phosphate ion transmembrane transporter activity	14/5096	46/76374	1.06135e-06	6.23598e-06	3.23574e-06	BnaA03g15270D/BnaA03g18250D/BnaA04g21000D/BnaA04g21010D/BnaA04g22280D/BnaA05g06200D/BnaA05g06210D/BnaA05g06230D/BnaC03g18410D/BnaC03g72240D/BnaC04g06470D/BnaC04g06480D/BnaC04g44990D/BnaC04g46050D	14
biological_process	GO:0006636	unsaturated fatty acid biosynthetic process	46/5096	323/76374	1.08611e-06	6.35507e-06	3.29753e-06	BnaA01g35430D/BnaA02g17050D/BnaA02g26450D/BnaA03g36320D/BnaA03g39650D/BnaA03g41980D/BnaA06g13360D/BnaA06g22280D/BnaA06g37230D/BnaA07g21940D/BnaA07g31890D/BnaA08g04610D/BnaA08g16820D/BnaA09g06230D/BnaA09g11320D/BnaA09g11790D/BnaA10g13400D/BnaA10g16310D/BnaAnng40850D/BnaC01g00070D/BnaC01g17340D/BnaC01g22400D/BnaC01g24130D/BnaC01g26460D/BnaC02g34570D/BnaC03g42170D/BnaC03g51460D/BnaC03g60280D/BnaC03g…	46
molecular_function	GO:0004028	3-chloroallyl aldehyde dehydrogenase activity	15/5096	53/76374	1.24255e-06	7.24053e-06	3.75698e-06	BnaA01g01360D/BnaA03g59170D/BnaA06g01320D/BnaA06g20780D/BnaA07g05850D/BnaA08g00900D/BnaA08g15200D/BnaC01g02370D/BnaC03g53290D/BnaC03g61970D/BnaC03g78230D/BnaC05g26280D/BnaC06g06890D/BnaC07g46060D/BnaC09g47240D	15
biological_process	GO:0007584	response to nutrient	9/5096	19/76374	1.29886e-06	7.53767e-06	3.91116e-06	BnaA07g07410D/BnaA08g17440D/BnaA09g26270D/BnaC02g40240D/BnaC03g76090D/BnaC03g76100D/BnaC03g76160D/BnaC07g09070D/BnaCnng41590D	9
biological_process	GO:0015976	carbon utilization	10/5096	24/76374	1.42373e-06	8.22858e-06	4.26966e-06	BnaA01g21620D/BnaA06g04100D/BnaA06g04110D/BnaA07g09830D/BnaA09g29930D/BnaC01g27750D/BnaC05g18860D/BnaC07g13050D/BnaCnng45230D/BnaCnng45250D	10
biological_process	GO:0006487	protein N-linked glycosylation	57/5096	440/76374	1.43191e-06	8.24219e-06	4.27673e-06	BnaA01g29490D/BnaA01g36840D/BnaA02g23620D/BnaA03g24080D/BnaA03g33290D/BnaA03g34300D/BnaA03g34320D/BnaA03g35650D/BnaA03g35930D/BnaA03g38420D/BnaA03g43900D/BnaA04g04810D/BnaA05g18810D/BnaA05g18830D/BnaA05g20140D/BnaA05g20160D/BnaA05g23050D/BnaA05g25200D/BnaA06g25800D/BnaA07g02450D/BnaA08g02070D/BnaA08g06440D/BnaA08g09030D/BnaA09g33680D/BnaA09g53530D/BnaA09g53550D/BnaAnng05310D/BnaAnng20420D/BnaAnng…	57
biological_process	GO:0010483	pollen tube reception	7/5096	11/76374	1.52273e-06	8.69428e-06	4.5113e-06	BnaA01g19380D/BnaA03g41360D/BnaA09g32070D/BnaA10g12670D/BnaC01g23340D/BnaC07g32280D/BnaC08g22890D	7
cellular_component	GO:0035101	FACT complex	7/5096	11/76374	1.52273e-06	8.69428e-06	4.5113e-06	BnaA03g24480D/BnaA03g24490D/BnaA09g22410D/BnaC03g29110D/BnaCnng25210D/BnaCnng25220D/BnaCnng25230D	7
biological_process	GO:0009269	response to desiccation	31/5096	183/76374	1.60433e-06	9.12341e-06	4.73397e-06	BnaA01g05320D/BnaA01g09860D/BnaA03g18760D/BnaA03g43910D/BnaA04g22810D/BnaA05g05760D/BnaA05g18020D/BnaA06g01320D/BnaA08g00900D/BnaA08g09060D/BnaA08g16740D/BnaAnng22640D/BnaAnng24130D/BnaAnng40060D/BnaC01g00170D/BnaC01g40980D/BnaC03g63040D/BnaC03g72600D/BnaC03g78230D/BnaC04g05620D/BnaC04g46630D/BnaC04g47950D/BnaC05g28450D/BnaC06g06890D/BnaC06g14670D/BnaC07g09190D/BnaC07g35730D/BnaC08g07580D/BnaCnng…	31
molecular_function	GO:0009001	serine O-acetyltransferase activity	8/5096	15/76374	1.64229e-06	9.22809e-06	4.78829e-06	BnaA05g13500D/BnaA06g00050D/BnaA08g00140D/BnaC03g70970D/BnaC04g10980D/BnaC05g32410D/BnaC06g11170D/BnaCnng25440D	8
biological_process	GO:0032527	protein exit from endoplasmic reticulum	8/5096	15/76374	1.64229e-06	9.22809e-06	4.78829e-06	BnaA06g32030D/BnaA09g01600D/BnaC02g36970D/BnaC02g37640D/BnaC07g24450D/BnaC09g00760D/BnaCnng51850D/BnaCnng51860D	8
biological_process	GO:0033587	shikimate biosynthetic process	8/5096	15/76374	1.64229e-06	9.22809e-06	4.78829e-06	BnaA02g01610D/BnaA03g04310D/BnaA08g02750D/BnaA10g19920D/BnaC02g04730D/BnaC03g05850D/BnaC03g07200D/BnaC09g43670D	8
biological_process	GO:0006569	tryptophan catabolic process	52/5096	392/76374	2.00596e-06	1.1227e-05	5.82549e-06	BnaA01g01140D/BnaA01g03820D/BnaA01g23480D/BnaA03g37120D/BnaA03g53530D/BnaA04g01540D/BnaA04g12000D/BnaA05g13500D/BnaA05g16130D/BnaA06g05210D/BnaA06g14510D/BnaA07g01510D/BnaA07g06190D/BnaA07g11370D/BnaA07g15990D/BnaA08g02630D/BnaA08g11930D/BnaA08g15350D/BnaA08g21730D/BnaA08g26700D/BnaA09g15640D/BnaA09g33460D/BnaA09g34470D/BnaA09g43380D/BnaA09g48640D/BnaC01g05180D/BnaC03g61910D/BnaC03g66780D/BnaC03g…	52
biological_process	GO:0009880	embryonic pattern specification	31/5096	185/76374	2.0329e-06	1.1333e-05	5.8805e-06	BnaA01g12740D/BnaA02g01670D/BnaA03g04360D/BnaA03g08110D/BnaA03g45660D/BnaA05g16000D/BnaA06g09540D/BnaA06g37720D/BnaA08g02300D/BnaA10g14710D/BnaC01g14470D/BnaC02g04790D/BnaC02g18170D/BnaC03g05900D/BnaC03g10290D/BnaC03g35740D/BnaC05g10910D/BnaC05g30160D/BnaC05g50600D/BnaC06g03160D/BnaC07g35230D/BnaC07g37760D/BnaC08g16400D/BnaC09g37040D/BnaCnng23110D/BnaCnng52080D/BnaCnng59290D/BnaCnng70560D/BnaCnng…	31
biological_process	GO:0010264	myo-inositol hexakisphosphate biosynthetic process	36/5096	232/76374	2.09794e-06	1.16497e-05	6.04483e-06	BnaA01g34430D/BnaA01g34710D/BnaA02g16660D/BnaA03g05780D/BnaA03g06500D/BnaA03g19400D/BnaA03g28980D/BnaA04g12720D/BnaA05g01050D/BnaA05g02120D/BnaA05g32480D/BnaA07g31170D/BnaA08g23520D/BnaA09g42760D/BnaA10g18360D/BnaA10g22070D/BnaAnng25620D/BnaAnng38950D/BnaC01g00680D/BnaC02g22570D/BnaC03g07500D/BnaC03g08320D/BnaC03g08340D/BnaC03g23250D/BnaC04g00590D/BnaC04g01790D/BnaC04g34650D/BnaC05g28320D/BnaC05g…	36
molecular_function	GO:0004365	glyceraldehyde-3-phosphate dehydrogenase (NAD+) (phosphorylating) activity	9/5096	20/76374	2.22092e-06	1.22845e-05	6.37419e-06	BnaA01g33660D/BnaA05g33200D/BnaA07g20300D/BnaA08g04610D/BnaC01g40210D/BnaC02g25850D/BnaC05g47450D/BnaC06g19790D/BnaC08g46180D	9
biological_process	GO:0043622	cortical microtubule organization	21/5096	100/76374	2.3333e-06	1.28558e-05	6.67065e-06	BnaA01g05450D/BnaA01g35060D/BnaA02g34360D/BnaA03g44480D/BnaA03g55860D/BnaA06g23700D/BnaA09g06990D/BnaA09g17180D/BnaC01g00330D/BnaC02g34680D/BnaC02g43280D/BnaC02g47470D/BnaC03g03990D/BnaC03g49550D/BnaC07g18150D/BnaC07g36310D/BnaC09g06600D/BnaC09g18360D/BnaCnng39720D/BnaCnng39730D/BnaCnng39740D	21
cellular_component	GO:0031307	integral component of mitochondrial outer membrane	17/5096	70/76374	2.59316e-06	1.42323e-05	7.38486e-06	BnaA05g15840D/BnaA05g19110D/BnaA06g02800D/BnaA07g00920D/BnaA08g02130D/BnaA09g10080D/BnaC01g21580D/BnaC03g68660D/BnaC05g26650D/BnaC05g32490D/BnaC06g03640D/BnaC06g03650D/BnaC07g01200D/BnaC07g12240D/BnaC08g36510D/BnaC09g10170D/BnaCnng58160D	17
biological_process	GO:0055072	iron ion homeostasis	20/5096	93/76374	2.73158e-06	1.49341e-05	7.74902e-06	BnaA02g00400D/BnaA04g02890D/BnaA04g02900D/BnaA04g02910D/BnaA04g02950D/BnaA07g17100D/BnaA07g17110D/BnaA09g36330D/BnaA10g07790D/BnaC02g00460D/BnaC04g24670D/BnaC04g24680D/BnaC04g24690D/BnaC04g24710D/BnaC08g27880D/BnaC09g28080D/BnaCnng57560D/BnaCnng64770D/BnaCnng73080D/BnaUnng04340D	20
molecular_function	GO:0016621	cinnamoyl-CoA reductase activity	13/5096	43/76374	2.79109e-06	1.52007e-05	7.88738e-06	BnaA02g02250D/BnaA02g26380D/BnaA04g19620D/BnaA07g32800D/BnaA10g11850D/BnaA10g19130D/BnaC02g05680D/BnaC02g34490D/BnaC02g35300D/BnaC04g44000D/BnaC06g37280D/BnaC09g42830D/BnaCnng32000D	13
molecular_function	GO:0004834	tryptophan synthase activity	12/5096	37/76374	2.94244e-06	1.59636e-05	8.28321e-06	BnaA01g16120D/BnaA03g48400D/BnaA09g00950D/BnaA09g34470D/BnaA10g09090D/BnaC07g02570D/BnaC07g40410D/BnaC08g25400D/BnaC09g00060D/BnaC09g31260D/BnaCnng28880D/BnaCnng29710D	12
biological_process	GO:0009643	photosynthetic acclimation	8/5096	16/76374	3.09114e-06	1.65797e-05	8.60293e-06	BnaA01g36280D/BnaA02g24310D/BnaA06g36180D/BnaC01g29930D/BnaC02g47130D/BnaC04g18310D/BnaC07g18860D/BnaC08g42000D	8
biological_process	GO:0035436	triose phosphate transmembrane transport	8/5096	16/76374	3.09114e-06	1.65797e-05	8.60293e-06	BnaA01g36280D/BnaA02g24310D/BnaA06g36180D/BnaC01g29930D/BnaC02g47130D/BnaC04g18310D/BnaC07g18860D/BnaC08g42000D	8
molecular_function	GO:0071917	triose-phosphate transmembrane transporter activity	8/5096	16/76374	3.09114e-06	1.65797e-05	8.60293e-06	BnaA01g36280D/BnaA02g24310D/BnaA06g36180D/BnaC01g29930D/BnaC02g47130D/BnaC04g18310D/BnaC07g18860D/BnaC08g42000D	8
biological_process	GO:0009830	cell wall modification involved in abscission	17/5096	71/76374	3.19801e-06	1.70882e-05	8.86677e-06	BnaA01g14670D/BnaA03g31030D/BnaA07g17330D/BnaA08g14510D/BnaA09g36800D/BnaA09g45200D/BnaAnng37920D/BnaC01g17240D/BnaC03g36340D/BnaC03g36350D/BnaC04g24110D/BnaC07g39470D/BnaC08g12020D/BnaC08g28490D/BnaC08g38050D/BnaC08g38060D/BnaCnng38530D	17
molecular_function	GO:0004822	isoleucine-tRNA ligase activity	7/5096	12/76374	3.44229e-06	1.82557e-05	9.47258e-06	BnaA03g45240D/BnaA03g45250D/BnaA04g11450D/BnaC06g41300D/BnaC07g37200D/BnaC07g37210D/BnaC07g37220D	7
biological_process	GO:0006428	isoleucyl-tRNA aminoacylation	7/5096	12/76374	3.44229e-06	1.82557e-05	9.47258e-06	BnaA03g45240D/BnaA03g45250D/BnaA04g11450D/BnaC06g41300D/BnaC07g37200D/BnaC07g37210D/BnaC07g37220D	7
biological_process	GO:0010150	leaf senescence	47/5096	351/76374	4.68216e-06	2.47386e-05	1.28364e-05	BnaA01g12740D/BnaA01g28930D/BnaA02g03140D/BnaA02g12430D/BnaA02g16520D/BnaA03g03400D/BnaA03g33890D/BnaA03g45660D/BnaA04g00380D/BnaA04g08160D/BnaA05g24050D/BnaA07g19430D/BnaA07g22570D/BnaA07g24270D/BnaA07g28000D/BnaA07g38980D/BnaA08g05360D/BnaA08g05370D/BnaA08g30660D/BnaA09g40130D/BnaA10g07790D/BnaA10g17910D/BnaC01g14470D/BnaC01g36040D/BnaC02g03850D/BnaC02g06690D/BnaC02g22330D/BnaC03g04830D/BnaC03g…	47
biological_process	GO:0006796	phosphate-containing compound metabolic process	16/5096	66/76374	5.19799e-06	2.73619e-05	1.41976e-05	BnaA03g38260D/BnaA07g01950D/BnaA08g03520D/BnaA09g09560D/BnaAnng38200D/BnaC02g14750D/BnaC02g46400D/BnaC03g05300D/BnaC03g45110D/BnaC03g46500D/BnaC07g01640D/BnaC07g03580D/BnaC07g08690D/BnaC08g07090D/BnaC09g22950D/BnaCnng43100D	16
biological_process	GO:0045454	cell redox homeostasis	57/5096	459/76374	5.31475e-06	2.78729e-05	1.44627e-05	BnaA01g03830D/BnaA01g11840D/BnaA02g00740D/BnaA02g07580D/BnaA03g07200D/BnaA03g21800D/BnaA03g45080D/BnaA03g52330D/BnaA03g53180D/BnaA04g00250D/BnaA04g26100D/BnaA05g00500D/BnaA06g14520D/BnaA07g11360D/BnaA07g14820D/BnaA07g24060D/BnaA07g24070D/BnaA07g28400D/BnaA08g10870D/BnaA08g11940D/BnaA09g12110D/BnaA09g16230D/BnaA09g40300D/BnaA09g40310D/BnaA09g53040D/BnaA10g16360D/BnaA10g21510D/BnaAnng26900D/BnaC01g…	57
molecular_function	GO:0000156	phosphorelay response regulator activity	27/5096	157/76374	5.46393e-06	2.85028e-05	1.47896e-05	BnaA02g06500D/BnaA03g34300D/BnaA03g34320D/BnaA03g40160D/BnaA04g26750D/BnaA05g01090D/BnaA05g23050D/BnaA07g24890D/BnaA07g26610D/BnaA10g12930D/BnaA10g26930D/BnaAnng00500D/BnaC01g44050D/BnaC02g03470D/BnaC03g39750D/BnaC03g54820D/BnaC04g00640D/BnaC04g51630D/BnaC05g36490D/BnaC06g26570D/BnaC06g28780D/BnaC09g05250D/BnaC09g35410D/BnaCnng03230D/BnaCnng27490D/BnaCnng27500D/BnaCnng43250D	27
molecular_function	GO:0008891	glycolate oxidase activity	12/5096	39/76374	5.47943e-06	2.85028e-05	1.47896e-05	BnaA01g29420D/BnaA03g33370D/BnaA05g25060D/BnaA10g24380D/BnaC01g08070D/BnaC01g36940D/BnaC03g38540D/BnaC05g26420D/BnaC09g08480D/BnaC09g39400D/BnaC09g48980D/BnaCnng09830D	12
biological_process	GO:0016139	glycoside catabolic process	8/5096	17/76374	5.49524e-06	2.85028e-05	1.47896e-05	BnaA03g02510D/BnaAnng06130D/BnaAnng06140D/BnaC02g01150D/BnaC02g01160D/BnaC03g03520D/BnaC03g03530D/BnaCnng62740D	8
biological_process	GO:0010077	maintenance of inflorescence meristem identity	11/5096	33/76374	5.63377e-06	2.91146e-05	1.51071e-05	BnaA03g39820D/BnaA06g39070D/BnaA09g05500D/BnaAnng06660D/BnaC02g41870D/BnaC07g49790D/BnaCnng24550D/BnaCnng52780D/BnaCnng52790D/BnaCnng78420D/BnaCnng78500D	11
biological_process	GO:0071493	cellular response to UV-B	9/5096	22/76374	5.818e-06	2.99574e-05	1.55444e-05	BnaA04g16310D/BnaA06g05150D/BnaA09g48720D/BnaA10g16720D/BnaC03g51730D/BnaC04g39580D/BnaC05g06430D/BnaC08g42970D/BnaC09g39740D	9
biological_process	GO:0030243	cellulose metabolic process	22/5096	114/76374	5.87387e-06	3.01355e-05	1.56368e-05	BnaA02g17050D/BnaA04g01120D/BnaA04g11860D/BnaA05g04720D/BnaA06g13360D/BnaA07g15180D/BnaA07g18800D/BnaA07g21940D/BnaA07g31890D/BnaA09g38720D/BnaAnng26460D/BnaC01g26460D/BnaC04g22010D/BnaC04g33870D/BnaC05g14920D/BnaC05g15760D/BnaC06g13300D/BnaC06g22680D/BnaC06g35760D/BnaC08g30890D/BnaCnng08220D/BnaCnng31120D	22
molecular_function	GO:0030170	pyridoxal phosphate binding	52/5096	407/76374	5.99288e-06	3.06351e-05	1.5896e-05	BnaA01g15380D/BnaA02g20250D/BnaA02g29830D/BnaA03g03400D/BnaA03g31030D/BnaA03g47880D/BnaA03g48400D/BnaA03g56490D/BnaA04g01540D/BnaA04g06460D/BnaA04g22010D/BnaA05g12790D/BnaA06g17710D/BnaA06g25700D/BnaA06g30890D/BnaA06g36140D/BnaA08g14930D/BnaA08g18660D/BnaA09g09210D/BnaA09g43670D/BnaA10g09090D/BnaAnng08840D/BnaAnng13240D/BnaAnng37920D/BnaC01g18250D/BnaC02g03850D/BnaC02g37910D/BnaC03g04830D/BnaC03g…	52
cellular_component	GO:0000159	protein phosphatase type 2A complex	19/5096	90/76374	6.401e-06	3.26037e-05	1.69174e-05	BnaA01g24050D/BnaA03g35530D/BnaA04g01980D/BnaA05g13880D/BnaA05g19180D/BnaA07g17860D/BnaA07g17880D/BnaA09g37450D/BnaAnng00670D/BnaAnng32970D/BnaC01g32870D/BnaC02g03070D/BnaC03g68540D/BnaC04g23560D/BnaC05g32560D/BnaC06g16610D/BnaC08g29250D/BnaCnng54820D/BnaCnng61610D	19
molecular_function	GO:0015200	methylammonium transmembrane transporter activity	7/5096	13/76374	7.02557e-06	3.51527e-05	1.82401e-05	BnaA01g28120D/BnaA03g34110D/BnaA05g23460D/BnaC01g44580D/BnaC03g39560D/BnaC05g37160D/BnaC06g05270D	7
biological_process	GO:0019388	galactose catabolic process	7/5096	13/76374	7.02557e-06	3.51527e-05	1.82401e-05	BnaA08g20600D/BnaA09g30060D/BnaA10g07730D/BnaC05g18490D/BnaC08g06210D/BnaC08g06220D/BnaCnng44490D	7
biological_process	GO:0019433	triglyceride catabolic process	7/5096	13/76374	7.02557e-06	3.51527e-05	1.82401e-05	BnaA03g01150D/BnaA10g26130D/BnaAnng00900D/BnaC02g02780D/BnaC03g01520D/BnaC03g01530D/BnaCnng10420D	7
biological_process	GO:0032025	response to cobalt ion	7/5096	13/76374	7.02557e-06	3.51527e-05	1.82401e-05	BnaA01g32870D/BnaA05g33470D/BnaA09g40630D/BnaAnng24620D/BnaC01g41980D/BnaC05g48220D/BnaC08g03320D	7
molecular_function	GO:0070402	NADPH binding	7/5096	13/76374	7.02557e-06	3.51527e-05	1.82401e-05	BnaA03g12800D/BnaA06g22280D/BnaA09g06230D/BnaC03g15660D/BnaC03g51460D/BnaC09g50930D/BnaCnng76470D	7
biological_process	GO:0009873	ethylene-activated signaling pathway	59/5096	486/76374	7.42412e-06	3.7016e-05	1.9207e-05	BnaA01g36840D/BnaA02g14040D/BnaA02g18180D/BnaA02g23620D/BnaA02g27860D/BnaA03g16730D/BnaA03g35930D/BnaA03g58390D/BnaA04g13710D/BnaA05g11040D/BnaA05g11750D/BnaA05g20140D/BnaA05g20160D/BnaA06g01320D/BnaA06g33030D/BnaA06g36370D/BnaA07g05600D/BnaA07g08440D/BnaA07g21300D/BnaA07g21320D/BnaA07g23090D/BnaA07g30130D/BnaA07g32970D/BnaA08g00900D/BnaA08g02070D/BnaA08g18380D/BnaA09g27300D/BnaA09g53530D/BnaA09g…	59
molecular_function	GO:0015174	basic amino acid transmembrane transporter activity	8/5096	18/76374	9.30989e-06	4.62554e-05	2.40011e-05	BnaA03g01440D/BnaA06g14510D/BnaA07g11370D/BnaA08g21730D/BnaC03g01740D/BnaC05g15970D/BnaC07g15280D/BnaC08g19360D	8
biological_process	GO:0006268	DNA unwinding involved in DNA replication	11/5096	35/76374	1.07231e-05	5.30904e-05	2.75476e-05	BnaA01g05990D/BnaA03g26370D/BnaA03g51370D/BnaA08g04370D/BnaA09g00540D/BnaA10g27860D/BnaC01g07250D/BnaC03g31160D/BnaC06g00930D/BnaC08g46630D/BnaCnng01120D	11
biological_process	GO:0006598	polyamine catabolic process	32/5096	210/76374	1.09667e-05	5.40372e-05	2.80389e-05	BnaA02g12430D/BnaA03g02040D/BnaA03g04460D/BnaA04g08160D/BnaA06g08310D/BnaA07g18130D/BnaA09g10560D/BnaA09g10570D/BnaA09g12880D/BnaA09g47290D/BnaA10g18360D/BnaA10g23880D/BnaAnng13720D/BnaAnng22640D/BnaAnng24130D/BnaC02g01610D/BnaC03g03050D/BnaC03g06000D/BnaC03g07500D/BnaC05g09640D/BnaC05g31580D/BnaC06g17070D/BnaC07g10790D/BnaC08g41390D/BnaC09g03800D/BnaC09g10830D/BnaC09g10840D/BnaC09g13230D/BnaC09g…	32
biological_process	GO:0009072	aromatic amino acid family metabolic process	23/5096	127/76374	1.09906e-05	5.40372e-05	2.80389e-05	BnaA02g17050D/BnaA02g26450D/BnaA06g13360D/BnaA06g22280D/BnaA07g21940D/BnaA07g31890D/BnaA09g06230D/BnaA09g49870D/BnaA10g04310D/BnaA10g13400D/BnaC01g26460D/BnaC02g34570D/BnaC03g51460D/BnaC05g04530D/BnaC05g14920D/BnaC06g22680D/BnaC06g35760D/BnaC08g44820D/BnaC09g50930D/BnaC09g53990D/BnaC09g54000D/BnaCnng08220D/BnaCnng76470D	23
molecular_function	GO:0003729	mRNA binding	21/5096	110/76374	1.12785e-05	5.52605e-05	2.86737e-05	BnaA01g15060D/BnaA03g35650D/BnaA03g47670D/BnaA05g17060D/BnaA05g18810D/BnaA05g18830D/BnaA06g03460D/BnaA06g09990D/BnaA08g02950D/BnaC01g17790D/BnaC01g32670D/BnaC01g32710D/BnaC02g29710D/BnaC03g41490D/BnaC05g11610D/BnaC05g25860D/BnaC05g31840D/BnaC05g51720D/BnaC06g02320D/BnaC07g39950D/BnaC08g03210D	21
biological_process	GO:0007033	vacuole organization	37/5096	260/76374	1.17528e-05	5.73859e-05	2.97765e-05	BnaA01g29820D/BnaA03g32820D/BnaA04g05950D/BnaA04g09140D/BnaA05g25880D/BnaA06g30860D/BnaA06g32030D/BnaA07g14670D/BnaA07g32810D/BnaA07g34830D/BnaA09g15650D/BnaA09g32380D/BnaA10g08630D/BnaAnng09660D/BnaAnng20790D/BnaAnng37030D/BnaC01g26770D/BnaC01g44830D/BnaC02g24100D/BnaC02g36970D/BnaC02g37640D/BnaC03g37920D/BnaC04g28570D/BnaC05g27860D/BnaC05g39960D/BnaC06g00750D/BnaC06g12620D/BnaC06g37290D/BnaC06g…	37
molecular_function	GO:0004357	glutamate-cysteine ligase activity	7/5096	14/76374	1.32367e-05	6.44097e-05	3.3421e-05	BnaA01g12900D/BnaA03g45730D/BnaA03g58670D/BnaC01g41470D/BnaC03g65140D/BnaC07g37900D/BnaC07g37950D	7
biological_process	GO:0009741	response to brassinosteroid	43/5096	323/76374	1.33664e-05	6.48178e-05	3.36328e-05	BnaA01g06750D/BnaA01g15000D/BnaA02g20750D/BnaA02g22470D/BnaA02g35250D/BnaA02g35330D/BnaA03g50050D/BnaA04g19840D/BnaA05g09840D/BnaA05g20130D/BnaA05g35240D/BnaA06g07470D/BnaA07g10800D/BnaA09g00050D/BnaA09g01040D/BnaA09g16590D/BnaA10g11500D/BnaAnng23050D/BnaAnng28960D/BnaAnng29870D/BnaAnng40580D/BnaC01g08130D/BnaC01g17710D/BnaC02g11480D/BnaC02g27240D/BnaC03g18800D/BnaC03g30720D/BnaC03g67980D/BnaC03g…	43
cellular_component	GO:0000323	lytic vacuole	6/5096	10/76374	1.46129e-05	6.89729e-05	3.57888e-05	BnaA02g08340D/BnaA03g10430D/BnaA10g11110D/BnaC03g13120D/BnaC09g53450D/BnaCnng64920D	6
biological_process	GO:0006750	glutathione biosynthetic process	11/5096	36/76374	1.45098e-05	6.89729e-05	3.57888e-05	BnaA01g12900D/BnaA03g14380D/BnaA03g45730D/BnaA03g58670D/BnaA05g11390D/BnaC01g41470D/BnaC03g17440D/BnaC03g65140D/BnaC07g37900D/BnaC07g37950D/BnaCnng30690D	11
biological_process	GO:0010617	circadian regulation of calcium ion oscillation	6/5096	10/76374	1.46129e-05	6.89729e-05	3.57888e-05	BnaA08g27870D/BnaA10g02550D/BnaAnng13370D/BnaC05g02520D/BnaC08g00670D/BnaC09g25510D	6
molecular_function	GO:0015269	calcium-activated potassium channel activity	6/5096	10/76374	1.46129e-05	6.89729e-05	3.57888e-05	BnaA01g21820D/BnaA03g11290D/BnaA10g09810D/BnaC01g28140D/BnaC03g71700D/BnaC09g32260D	6
biological_process	GO:0019632	shikimate metabolic process	6/5096	10/76374	1.46129e-05	6.89729e-05	3.57888e-05	BnaA03g29410D/BnaA05g30990D/BnaAnng03180D/BnaC03g34680D/BnaC05g21760D/BnaC05g45470D	6
biological_process	GO:0030029	actin filament-based process	6/5096	10/76374	1.46129e-05	6.89729e-05	3.57888e-05	BnaA08g00100D/BnaA10g10340D/BnaAnng20990D/BnaC02g12420D/BnaCnng21560D/BnaCnng21570D	6
molecular_function	GO:0030295	protein kinase activator activity	6/5096	10/76374	1.46129e-05	6.89729e-05	3.57888e-05	BnaA06g05260D/BnaA08g26660D/BnaA09g48590D/BnaC05g06550D/BnaC08g42850D/BnaCnng06550D	6
biological_process	GO:0046459	short-chain fatty acid metabolic process	6/5096	10/76374	1.46129e-05	6.89729e-05	3.57888e-05	BnaA04g05950D/BnaA09g32380D/BnaC04g28570D/BnaC05g27860D/BnaC08g23150D/BnaC09g53220D	6
molecular_function	GO:0008429	phosphatidylethanolamine binding	9/5096	25/76374	1.98859e-05	9.35498e-05	4.85413e-05	BnaA07g33120D/BnaA10g26300D/BnaAnng00810D/BnaC02g02900D/BnaC02g23820D/BnaC03g01440D/BnaC04g14850D/BnaCnng10680D/BnaCnng48850D	9
molecular_function	GO:0016597	amino acid binding	20/5096	106/76374	2.16126e-05	0.000101336	5.25814e-05	BnaA02g35990D/BnaA03g14730D/BnaA04g18470D/BnaA04g22950D/BnaA05g11160D/BnaA07g02330D/BnaA07g21750D/BnaA08g17100D/BnaA09g25320D/BnaAnng17990D/BnaC01g24380D/BnaC03g17780D/BnaC03g59990D/BnaC04g12850D/BnaC04g42560D/BnaC04g46450D/BnaC06g22470D/BnaCnng08010D/BnaCnng21170D/BnaCnng23380D	20
molecular_function	GO:0004476	mannose-6-phosphate isomerase activity	7/5096	15/76374	2.33819e-05	0.000108553	5.63263e-05	BnaA01g32870D/BnaA05g33470D/BnaA09g40630D/BnaAnng24620D/BnaC01g41980D/BnaC05g48220D/BnaC08g03320D	7
molecular_function	GO:0045552	dihydrokaempferol 4-reductase activity	7/5096	15/76374	2.33819e-05	0.000108553	5.63263e-05	BnaA02g26380D/BnaA07g27190D/BnaA10g11850D/BnaA10g19830D/BnaC02g34490D/BnaC06g30130D/BnaCnng32000D	7
biological_process	GO:0080165	callose deposition in phloem sieve plate	7/5096	15/76374	2.33819e-05	0.000108553	5.63263e-05	BnaA05g12940D/BnaA07g22680D/BnaA07g30830D/BnaC06g12120D/BnaC06g23590D/BnaC06g34330D/BnaCnng74430D	7
molecular_function	GO:0015120	phosphoglycerate transmembrane transporter activity	8/5096	20/76374	2.37462e-05	0.000109171	5.66468e-05	BnaA01g36280D/BnaA02g24310D/BnaA06g36180D/BnaC01g29930D/BnaC02g47130D/BnaC04g18310D/BnaC07g18860D/BnaC08g42000D	8
biological_process	GO:0015713	phosphoglycerate transmembrane transport	8/5096	20/76374	2.37462e-05	0.000109171	5.66468e-05	BnaA01g36280D/BnaA02g24310D/BnaA06g36180D/BnaC01g29930D/BnaC02g47130D/BnaC04g18310D/BnaC07g18860D/BnaC08g42000D	8
biological_process	GO:0071483	cellular response to blue light	8/5096	20/76374	2.37462e-05	0.000109171	5.66468e-05	BnaA01g24440D/BnaA03g36810D/BnaA05g16860D/BnaC05g29670D/BnaC06g20460D/BnaCnng14300D/BnaCnng37300D/BnaCnng53960D	8
molecular_function	GO:0030554	adenyl nucleotide binding	20/5096	107/76374	2.49252e-05	0.00011422	5.92669e-05	BnaA01g16460D/BnaA02g00740D/BnaA04g11860D/BnaA06g05260D/BnaA06g16460D/BnaA07g15180D/BnaA08g26660D/BnaA09g48590D/BnaA10g21510D/BnaAnng34810D/BnaC01g19650D/BnaC01g25430D/BnaC02g00040D/BnaC04g33870D/BnaC05g06550D/BnaC06g13300D/BnaC08g42850D/BnaC08g48500D/BnaC09g45610D/BnaCnng06550D	20
cellular_component	GO:0000326	protein storage vacuole	10/5096	32/76374	2.85601e-05	0.000130264	6.75917e-05	BnaA01g28120D/BnaA03g34110D/BnaA05g23460D/BnaAnng22640D/BnaAnng24130D/BnaC01g44580D/BnaC03g39560D/BnaC05g37160D/BnaC06g05270D/BnaCnng24720D	10
biological_process	GO:0080113	regulation of seed growth	9/5096	26/76374	2.86102e-05	0.000130264	6.75917e-05	BnaA03g34300D/BnaA03g34320D/BnaA05g23050D/BnaC01g44050D/BnaC01g44060D/BnaC03g39750D/BnaC05g36490D/BnaCnng27490D/BnaCnng27500D	9
biological_process	GO:0006552	leucine catabolic process	6/5096	11/76374	3.03211e-05	0.000137172	7.11758e-05	BnaA05g03290D/BnaA06g38800D/BnaA09g50980D/BnaC03g55280D/BnaC04g02910D/BnaC08g45780D	6
biological_process	GO:0045860	positive regulation of protein kinase activity	6/5096	11/76374	3.03211e-05	0.000137172	7.11758e-05	BnaA06g05260D/BnaA08g26660D/BnaA09g48590D/BnaC05g06550D/BnaC08g42850D/BnaCnng06550D	6
biological_process	GO:0071492	cellular response to UV-A	8/5096	21/76374	3.61098e-05	0.000162322	8.42261e-05	BnaA01g24440D/BnaA03g36810D/BnaA05g16860D/BnaC05g29670D/BnaC06g20460D/BnaCnng14300D/BnaCnng37300D/BnaCnng53960D	8
molecular_function	GO:2001070	starch binding	8/5096	21/76374	3.61098e-05	0.000162322	8.42261e-05	BnaA05g01890D/BnaA05g27980D/BnaA08g28830D/BnaA10g04550D/BnaC04g01600D/BnaC05g04910D/BnaC05g42210D/BnaC08g01990D	8
biological_process	GO:0042398	cellular modified amino acid biosynthetic process	30/5096	203/76374	3.67133e-05	0.000164513	8.53628e-05	BnaA02g12430D/BnaA03g02040D/BnaA04g08160D/BnaA06g08310D/BnaA07g18130D/BnaA09g10560D/BnaA09g10570D/BnaA09g12880D/BnaA09g47290D/BnaA10g18360D/BnaA10g23880D/BnaAnng13720D/BnaAnng22640D/BnaAnng24130D/BnaC02g01610D/BnaC03g03050D/BnaC03g07500D/BnaC05g09640D/BnaC05g31580D/BnaC06g17070D/BnaC07g10790D/BnaC08g41390D/BnaC09g03800D/BnaC09g10830D/BnaC09g10840D/BnaC09g13230D/BnaC09g41900D/BnaC09g47860D/BnaCnng…	30
biological_process	GO:0071486	cellular response to high light intensity	10/5096	33/76374	3.8528e-05	0.0001721	8.92996e-05	BnaA01g24440D/BnaA03g36810D/BnaA05g16860D/BnaA10g16720D/BnaC05g29670D/BnaC06g20460D/BnaC09g39740D/BnaCnng14300D/BnaCnng37300D/BnaCnng53960D	10
biological_process	GO:0006370	7-methylguanosine mRNA capping	7/5096	16/76374	3.91636e-05	0.000172222	8.93631e-05	BnaA03g00430D/BnaA03g49230D/BnaA05g29240D/BnaA06g29090D/BnaC03g00320D/BnaC07g49450D/BnaCnng24280D	7
biological_process	GO:0006537	glutamate biosynthetic process	7/5096	16/76374	3.91636e-05	0.000172222	8.93631e-05	BnaA06g39660D/BnaA09g02760D/BnaAnng07910D/BnaAnng37880D/BnaC02g38230D/BnaC04g31100D/BnaC07g26120D	7
biological_process	GO:0010629	negative regulation of gene expression	7/5096	16/76374	3.91636e-05	0.000172222	8.93631e-05	BnaA01g01100D/BnaA03g40160D/BnaA08g15400D/BnaC01g02130D/BnaC03g61840D/BnaC09g05250D/BnaCnng43250D	7
biological_process	GO:0071329	cellular response to sucrose stimulus	7/5096	16/76374	3.91636e-05	0.000172222	8.93631e-05	BnaA04g16310D/BnaA06g05150D/BnaA09g48720D/BnaC03g51730D/BnaC04g39580D/BnaC05g06430D/BnaC08g42970D	7
biological_process	GO:0071497	cellular response to freezing	7/5096	16/76374	3.91636e-05	0.000172222	8.93631e-05	BnaA07g10800D/BnaAnng28960D/BnaAnng29870D/BnaC05g17200D/BnaC07g14220D/BnaC07g19060D/BnaC08g20020D	7
biological_process	GO:0043433	negative regulation of DNA-binding transcription factor activity	9/5096	27/76374	4.03724e-05	0.000176989	9.18361e-05	BnaA10g00780D/BnaAnng17890D/BnaC03g00040D/BnaC05g00840D/BnaC07g02670D/BnaC07g02690D/BnaCnng45140D/BnaCnng45150D/BnaCnng45160D	9
biological_process	GO:0009816	defense response to bacterium, incompatible interaction	32/5096	224/76374	4.07634e-05	0.000178151	9.24394e-05	BnaA01g12900D/BnaA02g08820D/BnaA02g21660D/BnaA03g11100D/BnaA03g11140D/BnaA03g45730D/BnaA03g56550D/BnaA04g22680D/BnaA05g05590D/BnaA06g25800D/BnaA06g36140D/BnaA09g17880D/BnaA10g28400D/BnaA10g28410D/BnaC01g08680D/BnaC01g41470D/BnaC03g13470D/BnaC03g13870D/BnaC03g13930D/BnaC03g22390D/BnaC03g47810D/BnaC03g65140D/BnaC04g05370D/BnaC04g53300D/BnaC04g56750D/BnaC05g16520D/BnaC05g24360D/BnaC07g18960D/BnaC07g…	32
molecular_function	GO:0008138	protein tyrosine/serine/threonine phosphatase activity	14/5096	62/76374	4.67568e-05	0.000203716	0.000105704	BnaA03g00430D/BnaA04g05650D/BnaA05g27980D/BnaA05g29240D/BnaA06g29090D/BnaA09g32630D/BnaA09g32650D/BnaAnng41430D/BnaC03g00320D/BnaC04g28370D/BnaC05g42210D/BnaC07g49450D/BnaC08g23490D/BnaCnng24280D	14
biological_process	GO:0019722	calcium-mediated signaling	35/5096	257/76374	5.03943e-05	0.000218891	0.000113578	BnaA01g01360D/BnaA01g26200D/BnaA02g00920D/BnaA02g08820D/BnaA03g11100D/BnaA03g11140D/BnaA03g35190D/BnaA03g59170D/BnaA04g23670D/BnaA07g05850D/BnaA07g07410D/BnaA08g15200D/BnaA08g17440D/BnaA09g26270D/BnaA10g21200D/BnaC01g02370D/BnaC01g43800D/BnaC02g40240D/BnaC03g13470D/BnaC03g13870D/BnaC03g13930D/BnaC03g61970D/BnaC03g76090D/BnaC03g76100D/BnaC03g76160D/BnaC04g56810D/BnaC05g24360D/BnaC05g26280D/BnaC07g…	35
molecular_function	GO:0003860	3-hydroxyisobutyryl-CoA hydrolase activity	8/5096	22/76374	5.34194e-05	0.000230616	0.000119662	BnaA03g50820D/BnaA08g12350D/BnaA08g28650D/BnaA08g28670D/BnaA08g28680D/BnaC03g67370D/BnaC08g01840D/BnaC08g01850D	8
molecular_function	GO:0016682	oxidoreductase activity, acting on diphenols and related substances as donors, oxygen as acceptor	8/5096	22/76374	5.34194e-05	0.000230616	0.000119662	BnaA01g14670D/BnaA08g14510D/BnaA09g45200D/BnaC01g17240D/BnaC07g39470D/BnaC08g12020D/BnaC08g38050D/BnaC08g38060D	8
biological_process	GO:0010076	maintenance of floral meristem identity	9/5096	28/76374	5.59733e-05	0.000240906	0.000125002	BnaA02g35830D/BnaA04g12990D/BnaA07g24360D/BnaA07g27710D/BnaA09g42480D/BnaC04g35060D/BnaC06g25500D/BnaC06g29980D/BnaC08g34920D	9
biological_process	GO:0006744	ubiquinone biosynthetic process	22/5096	131/76374	5.62045e-05	0.000241168	0.000125138	BnaA01g13340D/BnaA03g15920D/BnaA03g17570D/BnaA03g46150D/BnaA03g46160D/BnaA05g06620D/BnaA05g09170D/BnaA08g15050D/BnaA09g08060D/BnaA09g11320D/BnaA09g11790D/BnaC01g15470D/BnaC03g19050D/BnaC03g21010D/BnaC03g62160D/BnaC04g07230D/BnaC04g10580D/BnaC04g20580D/BnaC07g50260D/BnaC09g08240D/BnaC09g11760D/BnaC09g12520D	22
molecular_function	GO:0016303	1-phosphatidylinositol-3-kinase activity	6/5096	12/76374	5.71999e-05	0.000243961	0.000126587	BnaA05g16000D/BnaA06g37720D/BnaA08g02300D/BnaC05g50600D/BnaC06g03160D/BnaCnng72060D	6
molecular_function	GO:0019172	glyoxalase III activity	6/5096	12/76374	5.71999e-05	0.000243961	0.000126587	BnaA03g33660D/BnaA04g05980D/BnaA05g24540D/BnaC03g38830D/BnaC04g28590D/BnaC05g38540D	6
cellular_component	GO:0009526	plastid envelope	7/5096	17/76374	6.27314e-05	0.000265157	0.000137585	BnaA03g02970D/BnaA10g21770D/BnaAnng21790D/BnaC01g27790D/BnaC09g46060D/BnaCnng35660D/BnaCnng60870D	7
biological_process	GO:0055071	manganese ion homeostasis	7/5096	17/76374	6.27314e-05	0.000265157	0.000137585	BnaA06g05910D/BnaA09g57160D/BnaA09g57270D/BnaC05g07470D/BnaC05g49250D/BnaC08g42380D/BnaCnng70270D	7
biological_process	GO:0071472	cellular response to salt stress	19/5096	105/76374	6.24555e-05	0.000265157	0.000137585	BnaA01g35060D/BnaA03g44480D/BnaA04g16310D/BnaA06g05150D/BnaA09g17180D/BnaA09g48720D/BnaA10g16720D/BnaC02g47470D/BnaC03g51730D/BnaC04g39580D/BnaC05g06430D/BnaC07g18150D/BnaC07g36310D/BnaC08g42970D/BnaC09g18360D/BnaC09g39740D/BnaCnng39720D/BnaCnng39730D/BnaCnng39740D	19
biological_process	GO:0052543	callose deposition in cell wall	22/5096	132/76374	6.32349e-05	0.00026649	0.000138277	BnaA01g02900D/BnaA01g34430D/BnaA02g35830D/BnaA03g06500D/BnaA03g28980D/BnaA03g51000D/BnaA04g12990D/BnaA05g32480D/BnaA07g24360D/BnaA07g27710D/BnaA09g42480D/BnaAnng25620D/BnaC01g04170D/BnaC03g08320D/BnaC03g08340D/BnaC04g35060D/BnaC05g14070D/BnaC06g25500D/BnaC06g29980D/BnaC08g34920D/BnaCnng18460D/BnaCnng53900D	22
biological_process	GO:0009861	jasmonic acid and ethylene-dependent systemic resistance	8/5096	23/76374	7.71151e-05	0.000324021	0.000168128	BnaA03g56600D/BnaA04g22740D/BnaA04g22750D/BnaA05g05650D/BnaC03g22310D/BnaC04g05430D/BnaC04g19600D/BnaC04g46730D	8
biological_process	GO:0007000	nucleolus organization	20/5096	116/76374	8.22138e-05	0.000344422	0.000178715	BnaA02g31160D/BnaA03g20700D/BnaA04g25600D/BnaA04g26100D/BnaA05g03800D/BnaA07g14820D/BnaA07g24060D/BnaA07g24070D/BnaA07g28400D/BnaA09g03730D/BnaC02g39720D/BnaC03g24730D/BnaC04g03410D/BnaC04g49500D/BnaC04g56890D/BnaC06g25120D/BnaC06g25130D/BnaC06g30940D/BnaC09g03160D/BnaCnng46660D	20
molecular_function	GO:0004708	MAP kinase kinase activity	10/5096	36/76374	8.79639e-05	0.000366344	0.000190089	BnaA01g07170D/BnaA03g10710D/BnaA03g47820D/BnaAnng19900D/BnaC01g08650D/BnaC03g13390D/BnaC06g27080D/BnaC07g40090D/BnaC09g25820D/BnaC09g33150D	10
biological_process	GO:0010114	response to red light	50/5096	427/76374	8.7899e-05	0.000366344	0.000190089	BnaA02g00920D/BnaA02g29010D/BnaA03g21310D/BnaA03g37990D/BnaA03g39650D/BnaA04g04350D/BnaA04g07450D/BnaA05g01530D/BnaA06g30310D/BnaA06g31910D/BnaA07g12950D/BnaA08g04610D/BnaA08g29950D/BnaA09g02120D/BnaA09g11320D/BnaA09g11790D/BnaA10g13400D/BnaA10g15850D/BnaA10g21200D/BnaAnng08760D/BnaAnng17190D/BnaAnng17200D/BnaC01g24130D/BnaC02g08620D/BnaC02g17140D/BnaC02g17150D/BnaC02g37040D/BnaC03g25650D/BnaC03g…	50
biological_process	GO:0045727	positive regulation of translation	16/5096	82/76374	9.16467e-05	0.000380562	0.000197467	BnaA01g32300D/BnaA03g10710D/BnaA03g43900D/BnaA03g47820D/BnaA05g29500D/BnaA08g09030D/BnaAnng19900D/BnaAnng34250D/BnaC01g39350D/BnaC03g13390D/BnaC03g63020D/BnaC05g43850D/BnaC06g27080D/BnaC07g35700D/BnaC07g40090D/BnaC09g33150D	16
biological_process	GO:0010029	regulation of seed germination	26/5096	174/76374	9.71763e-05	0.000402344	0.000208769	BnaA01g21820D/BnaA01g22240D/BnaA03g11290D/BnaA03g26790D/BnaA03g34300D/BnaA03g34320D/BnaA05g23050D/BnaA05g30860D/BnaA10g09810D/BnaC01g28140D/BnaC01g43110D/BnaC01g44050D/BnaC01g44060D/BnaC03g31730D/BnaC03g39750D/BnaC03g71700D/BnaC04g18480D/BnaC04g18490D/BnaC04g18510D/BnaC05g36490D/BnaC05g45320D/BnaC09g32260D/BnaCnng01800D/BnaCnng27490D/BnaCnng27500D/BnaCnng44630D	26
molecular_function	GO:0003984	acetolactate synthase activity	6/5096	13/76374	0.000100207	0.000412478	0.000214027	BnaA03g14730D/BnaA04g18470D/BnaA05g11160D/BnaC03g17780D/BnaC04g12850D/BnaC04g42560D	6
biological_process	GO:0030307	positive regulation of cell growth	6/5096	13/76374	0.000100207	0.000412478	0.000214027	BnaA05g16000D/BnaA06g37720D/BnaA08g02300D/BnaC05g50600D/BnaC06g03160D/BnaCnng72060D	6
cellular_component	GO:0009579	thylakoid	35/5096	266/76374	0.000101627	0.000417114	0.000216433	BnaA01g30320D/BnaA03g22260D/BnaA03g32440D/BnaA04g03360D/BnaA04g12000D/BnaA04g16190D/BnaA04g16310D/BnaA06g37230D/BnaA07g13530D/BnaA07g16660D/BnaA08g16820D/BnaA09g26450D/BnaA09g35380D/BnaA09g43380D/BnaAnng28680D/BnaAnng40850D/BnaC01g00070D/BnaC01g38270D/BnaC03g37820D/BnaC03g46980D/BnaC03g47010D/BnaC03g51730D/BnaC03g60280D/BnaC04g16310D/BnaC04g25260D/BnaC04g33690D/BnaC04g39420D/BnaC04g39580D/BnaC06g…	35
molecular_function	GO:0004332	fructose-bisphosphate aldolase activity	8/5096	24/76374	0.000108908	0.000444419	0.000230601	BnaA06g12420D/BnaA06g37230D/BnaA08g16820D/BnaAnng40850D/BnaC01g00070D/BnaC03g60280D/BnaC05g14020D/BnaC07g47470D	8
biological_process	GO:0031146	SCF-dependent proteasomal ubiquitin-dependent protein catabolic process	8/5096	24/76374	0.000108908	0.000444419	0.000230601	BnaA03g56600D/BnaA04g22740D/BnaA04g22750D/BnaA05g05650D/BnaC03g22310D/BnaC04g05430D/BnaC04g19600D/BnaC04g46730D	8
biological_process	GO:0044262	cellular carbohydrate metabolic process	14/5096	67/76374	0.000114843	0.000467294	0.00024247	BnaA04g03580D/BnaA04g03590D/BnaA05g03050D/BnaA05g03080D/BnaA06g38600D/BnaA07g08220D/BnaA07g37840D/BnaA09g35020D/BnaC03g46500D/BnaC04g25470D/BnaC04g25490D/BnaC04g52580D/BnaC08g26250D/BnaCnng15110D	14
biological_process	GO:0000187	activation of MAPK activity	9/5096	31/76374	0.000136079	0.000552115	0.000286483	BnaA01g07170D/BnaA03g10710D/BnaA03g47820D/BnaAnng19900D/BnaC01g08650D/BnaC03g13390D/BnaC06g27080D/BnaC07g40090D/BnaC09g33150D	9
biological_process	GO:0000304	response to singlet oxygen	7/5096	19/76374	0.000144322	0.00058222	0.000302104	BnaA03g48650D/BnaA03g60000D/BnaA09g13870D/BnaC07g50330D/BnaCnng04030D/BnaCnng04040D/BnaCnng10080D	7
cellular_component	GO:0005719	nuclear euchromatin	7/5096	19/76374	0.000144322	0.00058222	0.000302104	BnaA03g24480D/BnaA03g24490D/BnaA09g22410D/BnaC03g29110D/BnaCnng25210D/BnaCnng25220D/BnaCnng25230D	7
molecular_function	GO:0004462	lactoylglutathione lyase activity	8/5096	25/76374	0.0001508	0.000603201	0.00031299	BnaA05g35240D/BnaA06g10060D/BnaA08g23870D/BnaA09g56790D/BnaC05g11680D/BnaC08g16660D/BnaC08g38920D/BnaCnng59150D	8
biological_process	GO:0009228	thiamine biosynthetic process	8/5096	25/76374	0.0001508	0.000603201	0.00031299	BnaA03g33660D/BnaA04g05980D/BnaA05g03290D/BnaA05g24540D/BnaC03g38830D/BnaC04g02910D/BnaC04g28590D/BnaC05g38540D	8
cellular_component	GO:0042555	MCM complex	8/5096	25/76374	0.0001508	0.000603201	0.00031299	BnaA03g26370D/BnaA08g04370D/BnaA09g00540D/BnaA10g27860D/BnaC03g31160D/BnaC06g00930D/BnaC08g46630D/BnaCnng01120D	8
biological_process	GO:0009846	pollen germination	33/5096	251/76374	0.000159847	0.000637587	0.000330833	BnaA01g01920D/BnaA01g30930D/BnaA01g31090D/BnaA02g15620D/BnaA02g26680D/BnaA03g01930D/BnaA03g52810D/BnaA05g37430D/BnaA06g33830D/BnaA07g23350D/BnaA07g23400D/BnaA07g29600D/BnaA07g29680D/BnaA09g05750D/BnaA09g53660D/BnaAnng20790D/BnaC01g03060D/BnaC01g32020D/BnaC02g20830D/BnaC02g47930D/BnaC03g02450D/BnaC03g62340D/BnaC05g40130D/BnaC05g47480D/BnaC06g32800D/BnaC06g32880D/BnaC06g37400D/BnaC07g22100D/BnaC07g…	33
biological_process	GO:0030003	cellular cation homeostasis	48/5096	415/76374	0.000160721	0.000639274	0.000331708	BnaA01g11800D/BnaA01g28120D/BnaA01g30320D/BnaA02g12430D/BnaA02g14040D/BnaA03g32440D/BnaA03g34110D/BnaA04g04350D/BnaA04g08160D/BnaA04g09290D/BnaA04g11860D/BnaA05g23460D/BnaA06g12110D/BnaA06g12880D/BnaA06g14510D/BnaA07g11370D/BnaA07g15180D/BnaA08g21730D/BnaAnng17190D/BnaAnng17200D/BnaAnng22540D/BnaAnng30540D/BnaAnng37450D/BnaC01g13370D/BnaC01g38270D/BnaC01g44580D/BnaC02g18650D/BnaC03g13250D/BnaC03g…	48
biological_process	GO:0000024	maltose biosynthetic process	6/5096	14/76374	0.000165434	0.000652519	0.00033858	BnaA01g17940D/BnaA03g42940D/BnaA08g08230D/BnaC01g21190D/BnaC07g34180D/BnaC08g10900D	6
molecular_function	GO:0003910	DNA ligase (ATP) activity	6/5096	14/76374	0.000165434	0.000652519	0.00033858	BnaA03g00430D/BnaA05g29240D/BnaA07g25980D/BnaC03g00320D/BnaC06g27700D/BnaCnng24280D	6
biological_process	GO:0010507	negative regulation of autophagy	6/5096	14/76374	0.000165434	0.000652519	0.00033858	BnaA05g16000D/BnaA06g37720D/BnaA08g02300D/BnaC05g50600D/BnaC06g03160D/BnaCnng72060D	6
biological_process	GO:0071281	cellular response to iron ion	24/5096	160/76374	0.000166156	0.000653545	0.000339113	BnaA01g35060D/BnaA01g36840D/BnaA03g22200D/BnaA03g35930D/BnaA03g44480D/BnaA04g16280D/BnaA05g20140D/BnaA05g20160D/BnaA07g13690D/BnaA08g02070D/BnaA09g17180D/BnaC01g32460D/BnaC02g47470D/BnaC03g41740D/BnaC03g46920D/BnaC04g16120D/BnaC04g39550D/BnaC05g31510D/BnaC07g18150D/BnaC07g36310D/BnaC09g18360D/BnaCnng39720D/BnaCnng39730D/BnaCnng39740D	24
molecular_function	GO:0016616	oxidoreductase activity, acting on the CH-OH group of donors, NAD or NADP as acceptor	9/5096	32/76374	0.000178152	0.00069879	0.000362589	BnaA02g02250D/BnaA08g03520D/BnaA10g19130D/BnaAnng41330D/BnaC02g05680D/BnaC02g14750D/BnaC02g46400D/BnaC09g42830D/BnaCnng05710D	9
molecular_function	GO:0008453	alanine-glyoxylate transaminase activity	12/5096	54/76374	0.000188329	0.000736667	0.000382243	BnaA02g20250D/BnaA03g31030D/BnaA03g56490D/BnaA04g22010D/BnaAnng13240D/BnaAnng37920D/BnaC03g21300D/BnaC03g36340D/BnaC03g36350D/BnaC04g53410D/BnaC04g53420D/BnaC04g56620D	12
biological_process	GO:0009073	aromatic amino acid family biosynthetic process	32/5096	243/76374	0.000193137	0.000753395	0.000390923	BnaA01g35430D/BnaA03g36320D/BnaA03g41980D/BnaA05g04750D/BnaA06g37230D/BnaA08g16820D/BnaA09g08060D/BnaA09g11320D/BnaA09g11790D/BnaA09g50920D/BnaA10g01960D/BnaA10g16310D/BnaAnng12530D/BnaAnng40850D/BnaC01g00070D/BnaC01g17340D/BnaC01g22400D/BnaC03g42170D/BnaC03g60280D/BnaC03g76450D/BnaC04g20580D/BnaC04g20620D/BnaC04g44410D/BnaC07g33090D/BnaC07g47470D/BnaC08g45590D/BnaC08g45680D/BnaC09g08240D/BnaC09g…	32
molecular_function	GO:0032440	2-alkenal reductase [NAD(P)+] activity	19/5096	114/76374	0.000193748	0.000753703	0.000391083	BnaA01g02100D/BnaA01g02900D/BnaA01g26170D/BnaA01g26430D/BnaA03g51000D/BnaA05g20660D/BnaA07g01410D/BnaA07g11770D/BnaA07g33390D/BnaA09g19500D/BnaC01g03250D/BnaC01g04170D/BnaC05g33420D/BnaC06g37940D/BnaC07g01980D/BnaC07g15720D/BnaC09g52610D/BnaCnng21080D/BnaCnng48010D	19
biological_process	GO:0006424	glutamyl-tRNA aminoacylation	7/5096	20/76374	0.000209247	0.000811763	0.000421209	BnaA08g19390D/BnaA08g19400D/BnaA09g28460D/BnaC03g40690D/BnaC03g64100D/BnaC05g20730D/BnaCnng04720D	7
biological_process	GO:0008652	cellular amino acid biosynthetic process	20/5096	124/76374	0.000210446	0.000814183	0.000422465	BnaA02g17050D/BnaA02g26450D/BnaA03g53100D/BnaA06g13360D/BnaA06g22280D/BnaA07g21940D/BnaA07g31890D/BnaA09g06230D/BnaA10g13400D/BnaC01g26460D/BnaC02g34570D/BnaC03g51460D/BnaC05g14920D/BnaC06g22680D/BnaC06g35760D/BnaC09g50930D/BnaC09g53990D/BnaC09g54000D/BnaCnng08220D/BnaCnng76470D	20
biological_process	GO:0009694	jasmonic acid metabolic process	21/5096	134/76374	0.000223538	0.000862479	0.000447525	BnaA01g19370D/BnaA02g35880D/BnaA06g13580D/BnaA06g13670D/BnaA07g21790D/BnaA07g31980D/BnaA08g10550D/BnaA08g29490D/BnaA09g15940D/BnaA09g44150D/BnaAnng04430D/BnaAnng21790D/BnaAnng38010D/BnaC01g27790D/BnaC02g40330D/BnaC06g22500D/BnaC06g35990D/BnaC08g36710D/BnaCnng08080D/BnaCnng35660D/BnaCnng44260D	21
biological_process	GO:0006102	isocitrate metabolic process	12/5096	55/76374	0.000226362	0.000871002	0.000451947	BnaA02g12320D/BnaA03g04970D/BnaA07g17800D/BnaA07g25510D/BnaAnng08060D/BnaAnng25840D/BnaAnng25850D/BnaC02g24620D/BnaC03g06570D/BnaC06g16500D/BnaC06g27300D/BnaCnng36970D	12
biological_process	GO:0048229	gametophyte development	9/5096	33/76374	0.000230511	0.000884562	0.000458983	BnaA03g37260D/BnaA07g05790D/BnaA08g20600D/BnaA09g30060D/BnaC03g43570D/BnaC05g18490D/BnaC08g06210D/BnaC08g06220D/BnaC09g21440D	9
cellular_component	GO:0009536	plastid	37/5096	300/76374	0.000247114	0.000945711	0.000490712	BnaA03g03400D/BnaA04g21790D/BnaA05g15840D/BnaA05g19110D/BnaA06g02800D/BnaA06g06980D/BnaA07g02000D/BnaA07g07410D/BnaA07g32810D/BnaA08g02130D/BnaA08g17440D/BnaA09g26270D/BnaAnng37030D/BnaC01g21580D/BnaC02g03850D/BnaC02g40240D/BnaC03g04830D/BnaC03g46500D/BnaC03g68660D/BnaC03g76090D/BnaC03g76100D/BnaC03g76160D/BnaC04g45640D/BnaC05g08630D/BnaC05g26650D/BnaC05g32490D/BnaC06g03640D/BnaC06g03650D/BnaC07g…	37
molecular_function	GO:0003842	1-pyrroline-5-carboxylate dehydrogenase activity	5/5096	10/76374	0.000250233	0.000947406	0.000491592	BnaA06g39660D/BnaA09g02760D/BnaAnng07910D/BnaC02g38230D/BnaC07g26120D	5
biological_process	GO:0010155	regulation of proton transport	39/5096	322/76374	0.000248898	0.000947406	0.000491592	BnaA01g35430D/BnaA02g29010D/BnaA03g36320D/BnaA03g37990D/BnaA03g41980D/BnaA04g07450D/BnaA06g30310D/BnaA06g31910D/BnaA06g34070D/BnaA07g12950D/BnaA08g04610D/BnaA08g29950D/BnaA08g30000D/BnaA09g02120D/BnaA09g11320D/BnaA09g11790D/BnaA10g13400D/BnaAnng13370D/BnaC01g22400D/BnaC02g37040D/BnaC03g42170D/BnaC03g44110D/BnaC04g17180D/BnaC04g20580D/BnaC04g29670D/BnaC07g21830D/BnaC07g24660D/BnaC07g33090D/BnaC08g…	39
biological_process	GO:0043987	histone H3-S10 phosphorylation	5/5096	10/76374	0.000250233	0.000947406	0.000491592	BnaA01g04120D/BnaA03g02750D/BnaA08g12000D/BnaC01g05580D/BnaC03g66890D	5
molecular_function	GO:0047622	adenosine nucleosidase activity	5/5096	10/76374	0.000250233	0.000947406	0.000491592	BnaA03g16640D/BnaA05g07980D/BnaA06g18200D/BnaC03g20050D/BnaC04g08990D	5
molecular_function	GO:0004033	aldo-keto reductase (NADP) activity	6/5096	15/76374	0.000260135	0.000973618	0.000505193	BnaA05g06780D/BnaA05g34880D/BnaAnng30320D/BnaC04g53550D/BnaC04g53560D/BnaC04g53580D	6
molecular_function	GO:0009882	blue light photoreceptor activity	6/5096	15/76374	0.000260135	0.000973618	0.000505193	BnaA08g27870D/BnaA10g02550D/BnaAnng13370D/BnaC05g02520D/BnaC08g00670D/BnaC09g25510D	6
biological_process	GO:0009910	negative regulation of flower development	30/5096	226/76374	0.000261282	0.000973618	0.000505193	BnaA02g26550D/BnaA03g35530D/BnaA04g03960D/BnaA04g03970D/BnaA04g12990D/BnaA05g19180D/BnaA06g07470D/BnaA06g34030D/BnaA08g00100D/BnaA09g19140D/BnaA09g34520D/BnaA09g42480D/BnaA10g26300D/BnaAnng00810D/BnaAnng32970D/BnaAnng40580D/BnaC01g32870D/BnaC02g02900D/BnaC02g34760D/BnaC03g01440D/BnaC03g68540D/BnaC04g35060D/BnaC05g32560D/BnaC07g21870D/BnaC08g25470D/BnaC08g34920D/BnaCnng10680D/BnaCnng33070D/BnaCnng…	30
biological_process	GO:0010043	response to zinc ion	42/5096	356/76374	0.000260833	0.000973618	0.000505193	BnaA01g32870D/BnaA02g12320D/BnaA03g34300D/BnaA03g34320D/BnaA04g03580D/BnaA04g03590D/BnaA05g23050D/BnaA05g33470D/BnaA06g24140D/BnaA07g17800D/BnaA07g25510D/BnaA07g37840D/BnaA09g07120D/BnaA09g35020D/BnaA09g35800D/BnaA09g40630D/BnaAnng04720D/BnaAnng24620D/BnaAnng25840D/BnaAnng25850D/BnaC01g41980D/BnaC01g44050D/BnaC01g44060D/BnaC02g24620D/BnaC02g43620D/BnaC03g39750D/BnaC03g49070D/BnaC04g25470D/BnaC04g…	42
cellular_component	GO:0031090	organelle membrane	6/5096	15/76374	0.000260135	0.000973618	0.000505193	BnaA04g00380D/BnaA07g19430D/BnaA09g40130D/BnaC04g21210D/BnaC06g18590D/BnaC08g32470D	6
biological_process	GO:1900425	negative regulation of defense response to bacterium	6/5096	15/76374	0.000260135	0.000973618	0.000505193	BnaA03g07230D/BnaA10g16320D/BnaAnng08500D/BnaC02g08300D/BnaC03g09150D/BnaC09g39170D	6
biological_process	GO:0000096	sulfur amino acid metabolic process	20/5096	126/76374	0.000262025	0.000973826	0.000505301	BnaA02g17050D/BnaA02g26450D/BnaA03g53100D/BnaA06g13360D/BnaA06g22280D/BnaA07g21940D/BnaA07g31890D/BnaA09g06230D/BnaA10g13400D/BnaC01g26460D/BnaC02g34570D/BnaC03g51460D/BnaC05g14920D/BnaC06g22680D/BnaC06g35760D/BnaC09g50930D/BnaC09g53990D/BnaC09g54000D/BnaCnng08220D/BnaCnng76470D	20
molecular_function	GO:0015035	protein disulfide oxidoreductase activity	35/5096	280/76374	0.000276901	0.00102642	0.00053259	BnaA01g03830D/BnaA02g07580D/BnaA03g07200D/BnaA03g21800D/BnaA03g52330D/BnaA04g00250D/BnaA04g26100D/BnaA05g00500D/BnaA07g14820D/BnaA07g24060D/BnaA07g24070D/BnaA07g28400D/BnaA08g11940D/BnaA09g16230D/BnaA09g40300D/BnaA09g40310D/BnaA10g16360D/BnaAnng26900D/BnaC01g05190D/BnaC02g08250D/BnaC03g09120D/BnaC03g26070D/BnaC03g66790D/BnaC04g27450D/BnaC04g51940D/BnaC04g56890D/BnaC06g25120D/BnaC06g25130D/BnaC06g…	35
biological_process	GO:0009088	threonine biosynthetic process	7/5096	21/76374	0.000295815	0.00108517	0.000563074	BnaA06g25900D/BnaA07g36280D/BnaA09g09000D/BnaC03g47540D/BnaC07g20860D/BnaC09g09260D/BnaCnng22770D	7
biological_process	GO:0016117	carotenoid biosynthetic process	50/5096	449/76374	0.000295607	0.00108517	0.000563074	BnaA01g16240D/BnaA01g16420D/BnaA01g35430D/BnaA02g17050D/BnaA02g26450D/BnaA03g36320D/BnaA03g41980D/BnaA04g04350D/BnaA06g13360D/BnaA06g22280D/BnaA07g21940D/BnaA07g31890D/BnaA09g06230D/BnaA09g11320D/BnaA09g11790D/BnaA09g49870D/BnaA10g04310D/BnaA10g13400D/BnaA10g16310D/BnaA10g24590D/BnaAnng17190D/BnaAnng17200D/BnaC01g19340D/BnaC01g19600D/BnaC01g19610D/BnaC01g22400D/BnaC01g26460D/BnaC02g34570D/BnaC03g…	50
biological_process	GO:0033591	response to L-ascorbic acid	7/5096	21/76374	0.000295815	0.00108517	0.000563074	BnaA01g32870D/BnaA05g33470D/BnaA09g40630D/BnaAnng24620D/BnaC01g41980D/BnaC05g48220D/BnaC08g03320D	7
biological_process	GO:0052325	cell wall pectin biosynthetic process	7/5096	21/76374	0.000295815	0.00108517	0.000563074	BnaA02g02630D/BnaA03g05430D/BnaA10g18710D/BnaC02g06070D/BnaC02g29340D/BnaC03g06960D/BnaC09g42440D	7
molecular_function	GO:0005546	phosphatidylinositol-4,5-bisphosphate binding	10/5096	42/76374	0.000352374	0.00128931	0.000668999	BnaA01g35060D/BnaA03g44480D/BnaA09g17180D/BnaC02g47470D/BnaC07g18150D/BnaC07g36310D/BnaC09g18360D/BnaCnng39720D/BnaCnng39730D/BnaCnng39740D	10
biological_process	GO:0010117	photoprotection	8/5096	28/76374	0.000361867	0.00132063	0.00068525	BnaA01g24440D/BnaA03g36810D/BnaA05g16860D/BnaC05g29670D/BnaC06g20460D/BnaCnng14300D/BnaCnng37300D/BnaCnng53960D	8
biological_process	GO:0008299	isoprenoid biosynthetic process	11/5096	50/76374	0.000379008	0.00137609	0.000714028	BnaA02g31160D/BnaA03g15920D/BnaA05g09170D/BnaA08g03520D/BnaA09g03730D/BnaC02g14750D/BnaC02g39720D/BnaC02g46400D/BnaC03g19050D/BnaC04g10580D/BnaC09g03160D	11
biological_process	GO:0051260	protein homooligomerization	11/5096	50/76374	0.000379008	0.00137609	0.000714028	BnaA01g21820D/BnaA03g11290D/BnaA06g27940D/BnaA09g41490D/BnaA10g09810D/BnaC01g28140D/BnaC03g71700D/BnaC04g14550D/BnaC07g29000D/BnaC08g34080D/BnaC09g32260D	11
molecular_function	GO:0043621	protein self-association	18/5096	111/76374	0.000398293	0.00144241	0.000748442	BnaA03g37260D/BnaA05g16000D/BnaA06g37720D/BnaA06g39070D/BnaA07g05790D/BnaA07g15990D/BnaA08g02300D/BnaA09g33460D/BnaC03g43570D/BnaC05g50600D/BnaC06g03160D/BnaC06g14440D/BnaC08g24280D/BnaC09g21440D/BnaCnng24550D/BnaCnng72060D/BnaCnng78420D/BnaCnng78500D	18
biological_process	GO:0009718	anthocyanin-containing compound biosynthetic process	26/5096	190/76374	0.00040429	0.00146039	0.000757772	BnaA01g16420D/BnaA01g24440D/BnaA01g24900D/BnaA02g15320D/BnaA02g30470D/BnaA03g20290D/BnaA03g36810D/BnaA05g03420D/BnaA05g16860D/BnaA07g29070D/BnaA09g46770D/BnaC01g19600D/BnaC01g19610D/BnaC02g38800D/BnaC03g24270D/BnaC04g53030D/BnaC05g29670D/BnaC06g20460D/BnaC06g32180D/BnaC08g40840D/BnaCnng14300D/BnaCnng37300D/BnaCnng47800D/BnaCnng53960D/BnaCnng69170D/BnaCnng69180D	26
biological_process	GO:0000914	phragmoplast assembly	7/5096	22/76374	0.000408933	0.00146967	0.000762585	BnaA03g07280D/BnaA06g06280D/BnaA10g16260D/BnaAnng39950D/BnaC03g09230D/BnaC05g08040D/BnaC09g39110D	7
biological_process	GO:0009939	positive regulation of gibberellic acid mediated signaling pathway	7/5096	22/76374	0.000408933	0.00146967	0.000762585	BnaA01g23280D/BnaA09g20650D/BnaA09g49440D/BnaA10g04840D/BnaC05g05180D/BnaC06g06590D/BnaC07g27790D	7
biological_process	GO:0009834	plant-type secondary cell wall biogenesis	24/5096	170/76374	0.000418011	0.00149849	0.00077754	BnaA01g25880D/BnaA02g03580D/BnaA03g06610D/BnaA03g55200D/BnaA03g58390D/BnaA04g13710D/BnaA05g11750D/BnaA05g19350D/BnaA06g02910D/BnaA06g36370D/BnaAnng01240D/BnaC01g33070D/BnaC02g02440D/BnaC02g30750D/BnaC02g44220D/BnaC02g44340D/BnaC03g02050D/BnaC03g08460D/BnaC05g32840D/BnaC06g03410D/BnaC06g03450D/BnaC07g17610D/BnaC07g50180D/BnaCnng46970D	24
biological_process	GO:0009612	response to mechanical stimulus	31/5096	243/76374	0.000420519	0.00150367	0.000780229	BnaA01g01360D/BnaA01g15000D/BnaA01g26200D/BnaA02g08820D/BnaA02g35250D/BnaA02g35330D/BnaA03g11100D/BnaA03g11140D/BnaA03g35190D/BnaA03g40380D/BnaA03g59170D/BnaA07g05850D/BnaA08g15200D/BnaA10g11500D/BnaAnng06940D/BnaC01g02370D/BnaC01g17710D/BnaC01g43800D/BnaC02g11480D/BnaC02g48800D/BnaC03g13470D/BnaC03g13870D/BnaC03g13930D/BnaC03g61970D/BnaC05g24360D/BnaC05g26280D/BnaC07g31350D/BnaC07g46060D/BnaC09g…	31
molecular_function	GO:0005354	galactose transmembrane transporter activity	5/5096	11/76374	0.000433493	0.00153074	0.000794272	BnaA01g26430D/BnaA07g33390D/BnaC01g33830D/BnaC03g73840D/BnaC06g37940D	5
biological_process	GO:0010201	response to continuous far red light stimulus by the high-irradiance response system	5/5096	11/76374	0.000433493	0.00153074	0.000794272	BnaA06g05470D/BnaA09g48410D/BnaC08g42660D/BnaCnng08440D/BnaCnng19880D	5
biological_process	GO:0015757	galactose transmembrane transport	5/5096	11/76374	0.000433493	0.00153074	0.000794272	BnaA01g26430D/BnaA07g33390D/BnaC01g33830D/BnaC03g73840D/BnaC06g37940D	5
biological_process	GO:0018279	protein N-linked glycosylation via asparagine	5/5096	11/76374	0.000433493	0.00153074	0.000794272	BnaA02g34720D/BnaA07g12390D/BnaA09g07760D/BnaC07g16630D/BnaC09g07890D	5
molecular_function	GO:0035175	histone kinase activity (H3-S10 specific)	5/5096	11/76374	0.000433493	0.00153074	0.000794272	BnaA01g04120D/BnaA03g02750D/BnaA08g12000D/BnaC01g05580D/BnaC03g66890D	5
biological_process	GO:0009590	detection of gravity	8/5096	29/76374	0.000470632	0.00165775	0.000860176	BnaA03g55140D/BnaA08g20600D/BnaA09g30060D/BnaA10g07730D/BnaC05g18490D/BnaC08g06210D/BnaC08g06220D/BnaCnng44490D	8
biological_process	GO:0009620	response to fungus	45/5096	401/76374	0.000486185	0.00170828	0.000886398	BnaA01g05080D/BnaA01g16460D/BnaA02g26600D/BnaA03g16730D/BnaA03g48650D/BnaA03g51720D/BnaA03g60000D/BnaA05g18020D/BnaA05g30970D/BnaA06g25900D/BnaA06g33960D/BnaA07g02000D/BnaA07g21300D/BnaA07g32970D/BnaA07g36280D/BnaA08g07530D/BnaA09g09000D/BnaA09g13590D/BnaA09g13870D/BnaA10g29450D/BnaAnng37880D/BnaC01g06700D/BnaC01g19650D/BnaC02g34840D/BnaC03g47540D/BnaC04g31100D/BnaC05g28450D/BnaC05g45450D/BnaC06g…	45
biological_process	GO:0044237	cellular metabolic process	21/5096	142/76374	0.000499159	0.00174953	0.000907798	BnaA01g13540D/BnaA06g20580D/BnaA06g38100D/BnaA08g24600D/BnaA09g10850D/BnaA09g22180D/BnaA09g28550D/BnaAnng41370D/BnaC01g15760D/BnaC02g31430D/BnaC03g46690D/BnaC03g47350D/BnaC05g20670D/BnaC05g49280D/BnaC07g18040D/BnaC07g38610D/BnaC08g15730D/BnaC08g36510D/BnaC09g26030D/BnaCnng14830D/BnaCnng21690D	21
biological_process	GO:0044272	sulfur compound biosynthetic process	14/5096	77/76374	0.000526187	0.00183971	0.00095459	BnaA02g17050D/BnaA02g26450D/BnaA06g13360D/BnaA07g21940D/BnaA07g31890D/BnaA10g13400D/BnaC01g26460D/BnaC02g34570D/BnaC05g14920D/BnaC06g22680D/BnaC06g35760D/BnaC09g53990D/BnaC09g54000D/BnaCnng08220D	14
molecular_function	GO:0019904	protein domain specific binding	11/5096	52/76374	0.000541808	0.00188966	0.000980509	BnaA05g01050D/BnaA07g10500D/BnaA07g20620D/BnaA07g34180D/BnaA08g20850D/BnaC02g24950D/BnaC04g00590D/BnaC06g20480D/BnaC06g38800D/BnaC07g13790D/BnaC08g05950D	11
cellular_component	GO:0005746	mitochondrial respirasome	7/5096	23/76374	0.000554104	0.00191836	0.000995405	BnaA03g21760D/BnaA07g19310D/BnaA09g39850D/BnaC03g26030D/BnaC04g00250D/BnaC06g18510D/BnaC08g32200D	7
biological_process	GO:0040020	regulation of meiotic nuclear division	7/5096	23/76374	0.000554104	0.00191836	0.000995405	BnaA01g20470D/BnaC01g25750D/BnaC03g52880D/BnaC08g20460D/BnaC08g20470D/BnaCnng49920D/BnaCnng55310D	7
biological_process	GO:0080170	hydrogen peroxide transmembrane transport	7/5096	23/76374	0.000554104	0.00191836	0.000995405	BnaA01g09720D/BnaA03g43810D/BnaAnng22640D/BnaAnng24130D/BnaC01g11410D/BnaC07g35550D/BnaCnng24720D	7
cellular_component	GO:0009925	basal plasma membrane	6/5096	17/76374	0.000572711	0.00197314	0.00102382	BnaA02g08340D/BnaA03g10430D/BnaA10g11110D/BnaC03g13120D/BnaC09g53450D/BnaCnng64920D	6
biological_process	GO:0030259	lipid glycosylation	6/5096	17/76374	0.000572711	0.00197314	0.00102382	BnaA01g05080D/BnaA03g51720D/BnaA09g08200D/BnaC01g06700D/BnaC09g08430D/BnaCnng51890D	6
biological_process	GO:0019748	secondary metabolic process	20/5096	134/76374	0.000595043	0.0020451	0.00106117	BnaA01g35430D/BnaA02g17050D/BnaA02g26450D/BnaA03g36320D/BnaA03g41980D/BnaA06g13360D/BnaA07g21940D/BnaA07g31890D/BnaC01g17340D/BnaC01g22400D/BnaC01g26460D/BnaC02g34570D/BnaC03g42170D/BnaC03g76450D/BnaC04g44410D/BnaC05g14920D/BnaC06g22680D/BnaC06g35760D/BnaC07g33090D/BnaCnng08220D	20
biological_process	GO:0009790	embryo development	34/5096	281/76374	0.000606039	0.00206286	0.00107038	BnaA01g05080D/BnaA01g13340D/BnaA03g15920D/BnaA03g23570D/BnaA03g41010D/BnaA03g46150D/BnaA03g46160D/BnaA03g51720D/BnaA04g03960D/BnaA04g03970D/BnaA05g09170D/BnaA05g16020D/BnaA06g03090D/BnaA08g04370D/BnaA08g07530D/BnaA08g15050D/BnaA09g31530D/BnaA09g34520D/BnaA10g27860D/BnaC01g06700D/BnaC01g15470D/BnaC03g19050D/BnaC03g27960D/BnaC03g62160D/BnaC04g10580D/BnaC06g00930D/BnaC07g31920D/BnaC07g50260D/BnaC08g…	34
biological_process	GO:0031347	regulation of defense response	33/5096	270/76374	0.000605263	0.00206286	0.00107038	BnaA01g09720D/BnaA03g21290D/BnaA03g43810D/BnaA05g01590D/BnaA06g05210D/BnaA06g06960D/BnaA06g14510D/BnaA06g31740D/BnaA07g11370D/BnaA08g05360D/BnaA08g05370D/BnaA08g21730D/BnaA08g26700D/BnaA08g30660D/BnaA09g15640D/BnaA09g27310D/BnaA09g47680D/BnaA09g48640D/BnaC01g11410D/BnaC03g72730D/BnaC04g00970D/BnaC05g06500D/BnaC05g08610D/BnaC05g15970D/BnaC07g15280D/BnaC07g35550D/BnaC08g19360D/BnaC08g42140D/BnaC08g…	33
biological_process	GO:0070370	cellular heat acclimation	8/5096	30/76374	0.000604449	0.00206286	0.00107038	BnaA03g13820D/BnaA04g17420D/BnaA05g12160D/BnaAnng01980D/BnaC02g01720D/BnaC03g16740D/BnaC04g14500D/BnaC04g41050D	8
biological_process	GO:0080110	sporopollenin biosynthetic process	8/5096	30/76374	0.000604449	0.00206286	0.00107038	BnaA02g13940D/BnaA05g13490D/BnaA07g27190D/BnaA09g28520D/BnaA10g19830D/BnaC05g20660D/BnaC06g25820D/BnaC06g30130D	8
biological_process	GO:0009625	response to insect	30/5096	238/76374	0.000629358	0.0021371	0.0011089	BnaA01g03820D/BnaA03g13820D/BnaA03g47820D/BnaA03g56600D/BnaA04g17420D/BnaA04g22740D/BnaA04g22750D/BnaA05g05650D/BnaA05g12160D/BnaA06g28140D/BnaA08g11930D/BnaA08g30380D/BnaAnng13440D/BnaAnng28010D/BnaAnng40250D/BnaAnng41370D/BnaC01g05180D/BnaC01g41830D/BnaC03g16740D/BnaC03g22310D/BnaC03g66780D/BnaC04g05430D/BnaC04g14500D/BnaC04g19600D/BnaC04g41050D/BnaC04g46730D/BnaC07g10790D/BnaC07g40090D/BnaC08g…	30
cellular_component	GO:0090406	pollen tube	23/5096	165/76374	0.000651933	0.00220846	0.00114593	BnaA01g34430D/BnaA02g02630D/BnaA02g26600D/BnaA03g05430D/BnaA03g06500D/BnaA03g28980D/BnaA05g32480D/BnaA06g33960D/BnaA09g40940D/BnaA10g18710D/BnaAnng25620D/BnaC02g06070D/BnaC02g29340D/BnaC02g34840D/BnaC03g06960D/BnaC03g08320D/BnaC03g08340D/BnaC07g21980D/BnaC08g09590D/BnaC08g33440D/BnaC09g42440D/BnaCnng18460D/BnaCnng53900D	23
biological_process	GO:0006301	postreplication repair	21/5096	145/76374	0.000661118	0.00222362	0.0011538	BnaA01g17560D/BnaA01g27470D/BnaA02g26550D/BnaA03g59770D/BnaA04g19750D/BnaA06g34030D/BnaA07g15340D/BnaA08g07400D/BnaA09g19140D/BnaC01g21910D/BnaC01g44130D/BnaC02g34760D/BnaC03g53030D/BnaC03g53050D/BnaC04g19210D/BnaC04g44130D/BnaC05g36430D/BnaC06g42330D/BnaC07g21870D/BnaC09g13660D/BnaCnng33990D	21
biological_process	GO:0009617	response to bacterium	47/5096	430/76374	0.000658735	0.00222362	0.0011538	BnaA01g30490D/BnaA03g19470D/BnaA03g32320D/BnaA03g48650D/BnaA03g60000D/BnaA04g12990D/BnaA04g23920D/BnaA06g08310D/BnaA06g25900D/BnaA06g29500D/BnaA07g15990D/BnaA07g24270D/BnaA07g28000D/BnaA07g36280D/BnaA09g03330D/BnaA09g09000D/BnaA09g10560D/BnaA09g10570D/BnaA09g12880D/BnaA09g13870D/BnaA09g33460D/BnaA09g42480D/BnaA09g47290D/BnaC01g38510D/BnaC03g23350D/BnaC03g37680D/BnaC03g47540D/BnaC04g35060D/BnaC04g…	47
biological_process	GO:0048507	meristem development	22/5096	155/76374	0.000659556	0.00222362	0.0011538	BnaA01g22200D/BnaA03g22980D/BnaA03g24650D/BnaA03g54540D/BnaA04g03960D/BnaA04g03970D/BnaA04g07950D/BnaA04g19840D/BnaA05g09840D/BnaA07g25390D/BnaA09g34520D/BnaC01g43070D/BnaC03g18800D/BnaC03g27100D/BnaC04g44230D/BnaC06g27170D/BnaC08g25470D/BnaC08g34130D/BnaCnng05200D/BnaCnng25410D/BnaCnng41250D/BnaCnng60530D	22
biological_process	GO:0010582	floral meristem determinacy	13/5096	70/76374	0.000666428	0.00223088	0.00115756	BnaA02g35830D/BnaA04g12990D/BnaA06g39070D/BnaA07g24360D/BnaA07g27710D/BnaA09g42480D/BnaC04g35060D/BnaC06g25500D/BnaC06g29980D/BnaC08g34920D/BnaCnng24550D/BnaCnng78420D/BnaCnng78500D	13
molecular_function	GO:0016671	oxidoreductase activity, acting on a sulfur group of donors, disulfide as acceptor	13/5096	70/76374	0.000666428	0.00223088	0.00115756	BnaA01g11840D/BnaA01g19870D/BnaA03g45080D/BnaA04g26100D/BnaA07g14820D/BnaA09g16230D/BnaC01g13420D/BnaC01g24670D/BnaC03g56010D/BnaC04g56890D/BnaC07g37060D/BnaC09g17310D/BnaCnng46660D	13
biological_process	GO:0009736	cytokinin-activated signaling pathway	37/5096	316/76374	0.000671078	0.00224115	0.00116289	BnaA01g06940D/BnaA01g29320D/BnaA01g29370D/BnaA03g19400D/BnaA03g34300D/BnaA03g34320D/BnaA03g40240D/BnaA03g49910D/BnaA04g15110D/BnaA05g02120D/BnaA05g23050D/BnaA06g21560D/BnaA06g23450D/BnaA07g24890D/BnaA07g26610D/BnaA09g16590D/BnaA09g19860D/BnaAnng31910D/BnaC01g08350D/BnaC01g36750D/BnaC01g44050D/BnaC01g44060D/BnaC03g23250D/BnaC03g39750D/BnaC03g49710D/BnaC04g01790D/BnaC04g38040D/BnaC05g36490D/BnaC05g…	37
molecular_function	GO:0030145	manganese ion binding	18/5096	116/76374	0.00068473	0.00228136	0.00118376	BnaA02g20870D/BnaA03g25860D/BnaA05g29640D/BnaA08g26140D/BnaA08g26980D/BnaA09g39580D/BnaA09g48900D/BnaAnng14650D/BnaC02g46770D/BnaC03g30360D/BnaC04g17020D/BnaC04g17040D/BnaC05g43970D/BnaC08g13460D/BnaC08g13860D/BnaC08g31950D/BnaC08g43180D/BnaCnng32470D	18
molecular_function	GO:0004103	choline kinase activity	5/5096	12/76374	0.000702274	0.00231799	0.00120277	BnaA09g22870D/BnaA09g23300D/BnaA09g23320D/BnaC06g07990D/BnaC09g25860D	5
molecular_function	GO:0004618	phosphoglycerate kinase activity	5/5096	12/76374	0.000702274	0.00231799	0.00120277	BnaA01g30320D/BnaA03g32440D/BnaC01g38270D/BnaC03g37820D/BnaCnng23600D	5
biological_process	GO:0009700	indole phytoalexin biosynthetic process	5/5096	12/76374	0.000702274	0.00231799	0.00120277	BnaA01g12900D/BnaA03g45730D/BnaC01g41470D/BnaC03g65140D/BnaC07g37950D	5
biological_process	GO:0010088	phloem development	5/5096	12/76374	0.000702274	0.00231799	0.00120277	BnaA02g36130D/BnaA07g20350D/BnaA07g34920D/BnaC06g19840D/BnaC06g39850D	5
molecular_function	GO:0016844	strictosidine synthase activity	12/5096	62/76374	0.000721903	0.00237724	0.00123351	BnaA02g16660D/BnaA03g19400D/BnaA04g01590D/BnaA05g02120D/BnaA07g31170D/BnaA09g37870D/BnaC02g22570D/BnaC03g23250D/BnaC04g01790D/BnaC04g23020D/BnaC06g34860D/BnaC08g29730D	12
biological_process	GO:0009773	photosynthetic electron transport in photosystem I	27/5096	208/76374	0.000729076	0.00239529	0.00124287	BnaA03g12800D/BnaA03g39650D/BnaA04g03360D/BnaA04g04350D/BnaA06g12880D/BnaA07g16660D/BnaA08g04610D/BnaA09g35380D/BnaAnng17190D/BnaAnng17200D/BnaAnng22540D/BnaAnng37450D/BnaC01g24130D/BnaC03g15660D/BnaC03g25780D/BnaC03g28890D/BnaC03g76750D/BnaC04g25260D/BnaC04g26530D/BnaC05g50170D/BnaC06g15060D/BnaC06g42620D/BnaC08g26740D/BnaC08g46180D/BnaC08g48810D/BnaC08g49490D/BnaCnng40790D	27
biological_process	GO:0006567	threonine catabolic process	10/5096	46/76374	0.000764412	0.00249979	0.00129709	BnaA03g05080D/BnaA10g19050D/BnaC03g06620D/BnaC03g63470D/BnaC04g11450D/BnaC04g18790D/BnaC04g18800D/BnaC06g16280D/BnaC06g16290D/BnaC09g42740D	10
biological_process	GO:0042026	protein refolding	10/5096	46/76374	0.000764412	0.00249979	0.00129709	BnaA03g22260D/BnaA04g16190D/BnaA07g13530D/BnaAnng28680D/BnaC03g46980D/BnaC03g47010D/BnaC04g16310D/BnaC04g39420D/BnaC06g13040D/BnaC08g07110D	10
biological_process	GO:0048831	regulation of shoot system development	13/5096	71/76374	0.00076656	0.00250103	0.00129774	BnaA02g36650D/BnaA03g34300D/BnaA03g34320D/BnaA05g05170D/BnaA05g23050D/BnaC01g44050D/BnaC01g44060D/BnaC02g31510D/BnaC03g39750D/BnaC04g04570D/BnaC05g36490D/BnaCnng27490D/BnaCnng27500D	13
molecular_function	GO:0003747	translation release factor activity	6/5096	18/76374	0.000810703	0.0026269	0.00136305	BnaA06g12300D/BnaA08g22800D/BnaA09g44720D/BnaC05g13930D/BnaC08g17710D/BnaC08g37420D	6
biological_process	GO:0009150	purine ribonucleotide metabolic process	6/5096	18/76374	0.000810703	0.0026269	0.00136305	BnaA04g02570D/BnaA07g16900D/BnaA09g35930D/BnaC06g15970D/BnaC08g27420D/BnaCnng55070D	6
cellular_component	GO:0042406	extrinsic component of endoplasmic reticulum membrane	6/5096	18/76374	0.000810703	0.0026269	0.00136305	BnaA03g20290D/BnaA05g03420D/BnaA06g25800D/BnaC03g24270D/BnaC03g47810D/BnaC04g53030D	6
biological_process	GO:0006520	cellular amino acid metabolic process	13/5096	72/76374	0.000879031	0.00283337	0.00147018	BnaA03g03400D/BnaA03g24030D/BnaA05g34980D/BnaA08g06300D/BnaA08g18660D/BnaA10g16660D/BnaAnng38240D/BnaC02g03850D/BnaC03g04830D/BnaC03g28560D/BnaC03g58220D/BnaC08g06790D/BnaC09g39680D	13
molecular_function	GO:0008312	7S RNA binding	9/5096	39/76374	0.000880425	0.00283337	0.00147018	BnaA05g17060D/BnaA06g03460D/BnaA06g09990D/BnaA08g02950D/BnaC02g29710D/BnaC05g11610D/BnaC05g25860D/BnaC06g02320D/BnaC08g03210D	9
biological_process	GO:0008643	carbohydrate transport	13/5096	72/76374	0.000879031	0.00283337	0.00147018	BnaA01g29190D/BnaA03g54300D/BnaA04g01650D/BnaA05g24790D/BnaA06g15180D/BnaA08g21340D/BnaA09g37700D/BnaC01g36600D/BnaC04g23090D/BnaC05g16660D/BnaC05g38830D/BnaC08g48850D/BnaCnng57120D	13
molecular_function	GO:0004565	beta-galactosidase activity	14/5096	81/76374	0.000889289	0.0028554	0.00148162	BnaA01g37210D/BnaA02g08480D/BnaA03g10550D/BnaA03g22180D/BnaA05g25660D/BnaA07g13930D/BnaAnng30540D/BnaC01g37460D/BnaC02g12030D/BnaC03g13250D/BnaC03g46870D/BnaC04g15750D/BnaC05g39570D/BnaCnng68980D	14
biological_process	GO:0009116	nucleoside metabolic process	11/5096	55/76374	0.000892367	0.00285881	0.00148338	BnaA03g45390D/BnaA04g25770D/BnaA05g08630D/BnaA09g24370D/BnaC03g65030D/BnaC04g09710D/BnaC04g49680D/BnaC05g24530D/BnaC05g28770D/BnaC07g37320D/BnaCnng60440D	11
biological_process	GO:0006857	oligopeptide transport	50/5096	472/76374	0.000912449	0.00291342	0.00151172	BnaA01g01140D/BnaA01g09720D/BnaA01g27900D/BnaA02g15620D/BnaA03g01930D/BnaA03g18250D/BnaA03g34650D/BnaA03g43810D/BnaA03g52810D/BnaA03g53530D/BnaA04g21000D/BnaA04g21010D/BnaA04g22280D/BnaA05g06200D/BnaA05g06210D/BnaA05g06230D/BnaA06g12110D/BnaA06g24140D/BnaA07g23350D/BnaA07g29680D/BnaA08g15350D/BnaA09g07120D/BnaA09g14450D/BnaAnng04720D/BnaAnng24930D/BnaC01g11410D/BnaC01g28290D/BnaC01g34980D/BnaC02g…	50
biological_process	GO:0006885	regulation of pH	10/5096	47/76374	0.00091353	0.00291342	0.00151172	BnaA01g13360D/BnaA03g58740D/BnaA08g15080D/BnaA09g11430D/BnaA09g11440D/BnaC01g15520D/BnaC03g62130D/BnaC07g38420D/BnaC09g11890D/BnaC09g11900D	10
biological_process	GO:0010304	PSII associated light-harvesting complex II catabolic process	16/5096	100/76374	0.000947132	0.0030138	0.0015638	BnaA03g13420D/BnaA05g11730D/BnaA06g37230D/BnaA08g04610D/BnaA08g16820D/BnaA09g49910D/BnaA10g13400D/BnaAnng40850D/BnaC01g00070D/BnaC03g16230D/BnaC03g60280D/BnaC04g54290D/BnaC07g47470D/BnaC08g46180D/BnaC09g53990D/BnaC09g54000D	16
biological_process	GO:0008219	cell death	24/5096	180/76374	0.000956603	0.00303711	0.0015759	BnaA01g36840D/BnaA02g23620D/BnaA03g35930D/BnaA03g53180D/BnaA05g20140D/BnaA05g20160D/BnaA08g02070D/BnaA08g10870D/BnaA09g12110D/BnaA09g53040D/BnaA09g53530D/BnaA09g53550D/BnaAnng05310D/BnaC01g03420D/BnaC01g32460D/BnaC03g41740D/BnaC03g65530D/BnaC04g21590D/BnaC05g31510D/BnaC07g15160D/BnaC07g18200D/BnaC09g12080D/BnaCnng25140D/BnaCnng61530D	24
biological_process	GO:0010498	proteasomal protein catabolic process	45/5096	415/76374	0.000994325	0.00314981	0.00163438	BnaA01g19850D/BnaA01g33660D/BnaA02g07080D/BnaA02g20120D/BnaA02g20240D/BnaA03g09510D/BnaA03g14730D/BnaA03g37150D/BnaA03g45240D/BnaA03g45250D/BnaA04g11450D/BnaA04g18470D/BnaA05g11160D/BnaA05g33200D/BnaA06g08910D/BnaA06g18020D/BnaA06g20460D/BnaA06g27940D/BnaA07g05940D/BnaA08g16020D/BnaA09g42580D/BnaA10g12390D/BnaAnng30620D/BnaC01g40210D/BnaC02g10000D/BnaC03g12030D/BnaC03g17780D/BnaC03g43420D/BnaC03g…	45
biological_process	GO:0009791	post-embryonic development	13/5096	73/76374	0.001005	0.00317653	0.00164825	BnaA01g19380D/BnaA03g41360D/BnaA06g32030D/BnaA09g32070D/BnaA10g12670D/BnaC01g23340D/BnaC02g36970D/BnaC02g37640D/BnaC07g24450D/BnaC07g32280D/BnaC08g22890D/BnaCnng51850D/BnaCnng51860D	13
biological_process	GO:0009809	lignin biosynthetic process	31/5096	256/76374	0.00101137	0.00318953	0.00165499	BnaA02g01610D/BnaA02g02250D/BnaA02g26380D/BnaA03g04310D/BnaA03g55200D/BnaA04g19620D/BnaA06g40660D/BnaA07g32800D/BnaA08g02750D/BnaA10g11850D/BnaA10g19130D/BnaA10g19920D/BnaAnng01240D/BnaAnng41330D/BnaC01g00300D/BnaC02g02440D/BnaC02g04730D/BnaC02g05680D/BnaC02g34490D/BnaC02g35300D/BnaC03g02050D/BnaC03g05850D/BnaC03g07200D/BnaC04g44000D/BnaC06g33840D/BnaC06g37280D/BnaC07g47260D/BnaC09g42830D/BnaC09g…	31
cellular_component	GO:0005764	lysosome	5/5096	13/76374	0.00107857	0.00337887	0.00175323	BnaA03g57960D/BnaA09g32260D/BnaA09g32270D/BnaC07g32480D/BnaC08g23050D	5
molecular_function	GO:0047334	diphosphate-fructose-6-phosphate 1-phosphotransferase activity	5/5096	13/76374	0.00107857	0.00337887	0.00175323	BnaA06g08370D/BnaC05g09740D/BnaC07g09630D/BnaC08g15270D/BnaC08g41630D	5
biological_process	GO:0070981	L-asparagine biosynthetic process	5/5096	13/76374	0.00107857	0.00337887	0.00175323	BnaA06g17510D/BnaA06g20540D/BnaC03g53730D/BnaC03g75390D/BnaCnng72260D	5
biological_process	GO:0006535	cysteine biosynthetic process from serine	10/5096	48/76374	0.00108568	0.00339364	0.0017609	BnaA04g01540D/BnaA05g13500D/BnaA06g00050D/BnaA08g00140D/BnaC03g70970D/BnaC04g10980D/BnaC04g22760D/BnaC05g32410D/BnaC06g11170D/BnaCnng25440D	10
biological_process	GO:0015996	chlorophyll catabolic process	26/5096	203/76374	0.00110144	0.00343534	0.00178253	BnaA02g09890D/BnaA03g44400D/BnaA04g06570D/BnaA04g12720D/BnaA05g33840D/BnaA05g36350D/BnaA06g01320D/BnaA07g27460D/BnaA08g00900D/BnaA09g42760D/BnaA10g22070D/BnaA10g25820D/BnaAnng08930D/BnaC02g13840D/BnaC03g78230D/BnaC04g34650D/BnaC05g48840D/BnaC06g06890D/BnaC06g29630D/BnaC07g36250D/BnaC08g35240D/BnaC09g46450D/BnaCnng05590D/BnaCnng20610D/BnaCnng20870D/BnaCnng44960D	26
biological_process	GO:0036092	phosphatidylinositol-3-phosphate biosynthetic process	6/5096	19/76374	0.00111826	0.0034725	0.00180182	BnaA05g16000D/BnaA06g37720D/BnaA08g02300D/BnaC05g50600D/BnaC06g03160D/BnaCnng72060D	6
biological_process	GO:0048579	negative regulation of long-day photoperiodism, flowering	6/5096	19/76374	0.00111826	0.0034725	0.00180182	BnaA02g30480D/BnaA06g39620D/BnaA09g03180D/BnaC02g38810D/BnaC07g26830D/BnaC09g02610D	6
biological_process	GO:0030433	ubiquitin-dependent ERAD pathway	8/5096	33/76374	0.0011984	0.00371321	0.00192672	BnaA03g14210D/BnaA03g17100D/BnaA07g05610D/BnaA07g15650D/BnaC03g17190D/BnaC03g20620D/BnaC06g13860D/BnaC07g48050D	8
biological_process	GO:0006809	nitric oxide biosynthetic process	7/5096	26/76374	0.00124571	0.00385137	0.00199841	BnaA02g18610D/BnaA07g20840D/BnaA07g33680D/BnaA07g33690D/BnaC06g20690D/BnaC06g38300D/BnaCnng60930D	7
biological_process	GO:0009704	de-etiolation	10/5096	49/76374	0.00128343	0.00395934	0.00205443	BnaA03g39650D/BnaA06g33590D/BnaA09g19450D/BnaAnng22000D/BnaAnng22010D/BnaC01g24130D/BnaC02g35320D/BnaC07g22680D/BnaC09g22180D/BnaCnng40790D	10
biological_process	GO:0006099	tricarboxylic acid cycle	21/5096	153/76374	0.00133186	0.00409981	0.00212732	BnaA02g12320D/BnaA03g04970D/BnaA05g03040D/BnaA05g03050D/BnaA05g03080D/BnaA06g25230D/BnaA07g08220D/BnaA07g17800D/BnaA07g25510D/BnaAnng00830D/BnaAnng08060D/BnaAnng25850D/BnaAnng41760D/BnaC02g02870D/BnaC03g06570D/BnaC03g48410D/BnaC04g52580D/BnaC06g14420D/BnaC06g16500D/BnaC06g27300D/BnaCnng36970D	21
biological_process	GO:0006662	glycerol ether metabolic process	18/5096	123/76374	0.00137115	0.00420247	0.00218059	BnaA03g21800D/BnaA04g26100D/BnaA05g00500D/BnaA07g14820D/BnaA07g24060D/BnaA07g24070D/BnaA07g28400D/BnaA09g16230D/BnaC03g26070D/BnaC04g27450D/BnaC04g51940D/BnaC04g56890D/BnaC06g25120D/BnaC06g25130D/BnaC06g30940D/BnaC07g27970D/BnaC09g17310D/BnaCnng46660D	18
biological_process	GO:0006914	autophagy	32/5096	272/76374	0.00137039	0.00420247	0.00218059	BnaA01g17220D/BnaA02g08900D/BnaA03g11260D/BnaA03g21090D/BnaA03g42660D/BnaA03g54770D/BnaA03g59770D/BnaA04g00380D/BnaA05g03770D/BnaA06g19580D/BnaA07g13420D/BnaA07g19430D/BnaA07g38000D/BnaA09g40130D/BnaA10g27420D/BnaAnng27580D/BnaC01g19720D/BnaC02g12830D/BnaC03g00510D/BnaC03g14120D/BnaC03g25150D/BnaC03g71580D/BnaC04g03380D/BnaC04g16470D/BnaC04g19210D/BnaC04g21210D/BnaC06g18590D/BnaC07g33760D/BnaC08g…	32
biological_process	GO:0009934	regulation of meristem structural organization	12/5096	67/76374	0.00147126	0.00449957	0.00233474	BnaA03g37260D/BnaA04g10140D/BnaA04g11810D/BnaA05g21420D/BnaA07g05790D/BnaA09g13310D/BnaC03g43570D/BnaC04g32260D/BnaC04g33950D/BnaC05g34380D/BnaC09g13580D/BnaC09g21440D	12
molecular_function	GO:0047627	adenylylsulfatase activity	6/5096	20/76374	0.00150784	0.00459162	0.00238251	BnaA04g02570D/BnaA07g16900D/BnaA09g35930D/BnaC06g15970D/BnaC08g27420D/BnaCnng55070D	6
molecular_function	GO:0048040	UDP-glucuronate decarboxylase activity	6/5096	20/76374	0.00150784	0.00459162	0.00238251	BnaA06g04670D/BnaA08g27100D/BnaA09g48990D/BnaC05g05890D/BnaC08g02460D/BnaC08g43300D	6
biological_process	GO:0000041	transition metal ion transport	41/5096	377/76374	0.00152861	0.00464488	0.00241014	BnaA01g26140D/BnaA01g26170D/BnaA02g04270D/BnaA02g18730D/BnaA02g18740D/BnaA02g23620D/BnaA03g07620D/BnaA03g07630D/BnaA03g14420D/BnaA03g33490D/BnaA03g33520D/BnaA04g01640D/BnaA04g18320D/BnaA05g11350D/BnaA05g20660D/BnaA07g33960D/BnaA10g03980D/BnaA10g15600D/BnaA10g15610D/BnaA10g29710D/BnaC01g33430D/BnaC01g33490D/BnaC02g08770D/BnaC02g08780D/BnaC02g24780D/BnaC03g09640D/BnaC03g09650D/BnaC03g17470D/BnaC03g…	41
biological_process	GO:0006085	acetyl-CoA biosynthetic process	9/5096	42/76374	0.0015456	0.00467643	0.00242652	BnaA06g08370D/BnaA08g26390D/BnaA08g26420D/BnaC05g09740D/BnaC07g09630D/BnaC08g15270D/BnaC08g41630D/BnaCnng06880D/BnaCnng53790D	9
molecular_function	GO:0016759	cellulose synthase activity	9/5096	42/76374	0.0015456	0.00467643	0.00242652	BnaA01g34810D/BnaA03g51630D/BnaA04g28960D/BnaC01g06870D/BnaC02g34680D/BnaC03g77270D/BnaC04g43040D/BnaCnng37280D/BnaCnng46970D	9
molecular_function	GO:0003979	UDP-glucose 6-dehydrogenase activity	5/5096	14/76374	0.00158586	0.00474752	0.0024634	BnaA04g09140D/BnaA06g30860D/BnaA07g14670D/BnaC06g12620D/BnaC07g25800D	5
cellular_component	GO:0005776	autophagosome	5/5096	14/76374	0.00158586	0.00474752	0.0024634	BnaA03g21090D/BnaA04g26080D/BnaA07g38000D/BnaC03g25150D/BnaC04g50140D	5
biological_process	GO:0006065	UDP-glucuronate biosynthetic process	5/5096	14/76374	0.00158586	0.00474752	0.0024634	BnaA04g09140D/BnaA06g30860D/BnaA07g14670D/BnaC06g12620D/BnaC07g25800D	5
biological_process	GO:0006820	anion transport	7/5096	27/76374	0.00158565	0.00474752	0.0024634	BnaA02g01110D/BnaA03g03770D/BnaA10g20580D/BnaC02g04230D/BnaC03g05290D/BnaC03g05320D/BnaC09g44590D	7
biological_process	GO:0010031	circumnutation	7/5096	27/76374	0.00158565	0.00474752	0.0024634	BnaA03g40160D/BnaA04g15260D/BnaA09g40710D/BnaC08g33210D/BnaC09g05250D/BnaCnng43250D/BnaCnng51090D	7
biological_process	GO:0010197	polar nucleus fusion	14/5096	86/76374	0.0016201	0.0048398	0.00251128	BnaA01g03820D/BnaA03g14210D/BnaA03g17100D/BnaA04g13100D/BnaA07g05610D/BnaA07g15650D/BnaA08g11930D/BnaC01g05180D/BnaC03g17190D/BnaC03g20620D/BnaC03g66780D/BnaC04g35190D/BnaC06g13860D/BnaC07g48050D	14
biological_process	GO:0010017	red or far-red light signaling pathway	13/5096	77/76374	0.00166973	0.00497754	0.00258276	BnaA02g00920D/BnaA04g26750D/BnaA05g01090D/BnaA10g21200D/BnaA10g26930D/BnaAnng00500D/BnaC02g03470D/BnaC03g54820D/BnaC04g00640D/BnaC04g51630D/BnaC09g45380D/BnaCnng03230D/BnaCnng20200D	13
biological_process	GO:0006733	oxidoreduction coenzyme metabolic process	20/5096	146/76374	0.00175169	0.0052109	0.00270384	BnaA01g35430D/BnaA02g17050D/BnaA02g26450D/BnaA03g36320D/BnaA03g41980D/BnaA06g13360D/BnaA07g21940D/BnaA07g31890D/BnaC01g17340D/BnaC01g22400D/BnaC01g26460D/BnaC02g34570D/BnaC03g42170D/BnaC03g76450D/BnaC04g44410D/BnaC05g14920D/BnaC06g22680D/BnaC06g35760D/BnaC07g33090D/BnaCnng08220D	20
molecular_function	GO:0004620	phospholipase activity	8/5096	35/76374	0.00180307	0.00534927	0.00277564	BnaA01g10270D/BnaA03g44190D/BnaA03g44270D/BnaA09g13590D/BnaC01g41270D/BnaC07g36060D/BnaC09g13970D/BnaCnng59750D	8
biological_process	GO:0009908	flower development	33/5096	288/76374	0.00180576	0.00534927	0.00277564	BnaA01g12900D/BnaA02g08820D/BnaA03g06020D/BnaA03g08110D/BnaA03g11100D/BnaA03g11140D/BnaA03g22070D/BnaA03g45730D/BnaA04g16520D/BnaA07g12520D/BnaA07g24270D/BnaA07g28000D/BnaA10g14710D/BnaAnng00410D/BnaAnng27140D/BnaC01g41470D/BnaC02g44500D/BnaC03g07770D/BnaC03g10290D/BnaC03g13470D/BnaC03g13870D/BnaC03g13930D/BnaC03g26450D/BnaC03g65140D/BnaC04g39860D/BnaC05g24360D/BnaC06g30680D/BnaC06g43410D/BnaC07g…	33
biological_process	GO:0006950	response to stress	37/5096	334/76374	0.00182285	0.00538863	0.00279606	BnaA01g01550D/BnaA01g15720D/BnaA01g32620D/BnaA03g06130D/BnaA03g10790D/BnaA03g29650D/BnaA04g04240D/BnaA05g29880D/BnaA06g25520D/BnaA06g29720D/BnaA08g14820D/BnaA09g09350D/BnaA09g29100D/BnaA10g07970D/BnaA10g17840D/BnaAnng08060D/BnaAnng12790D/BnaC01g02600D/BnaC01g37030D/BnaC01g39690D/BnaC02g12680D/BnaC02g12750D/BnaC02g13140D/BnaC02g31430D/BnaC02g31440D/BnaC03g05300D/BnaC03g07870D/BnaC03g34880D/BnaC03g…	37
molecular_function	GO:0042802	identical protein binding	48/5096	464/76374	0.00185355	0.00546798	0.00283723	BnaA01g06940D/BnaA01g15380D/BnaA02g07220D/BnaA02g31000D/BnaA03g09630D/BnaA03g47880D/BnaA03g49910D/BnaA03g53100D/BnaA03g60380D/BnaA04g00900D/BnaA05g16000D/BnaA05g20130D/BnaA06g08520D/BnaA06g29270D/BnaA06g37720D/BnaA07g18900D/BnaA07g34830D/BnaA08g02300D/BnaA09g46250D/BnaA09g49870D/BnaA10g04310D/BnaA10g12220D/BnaA10g24380D/BnaA10g29100D/BnaAnng20560D/BnaC01g08350D/BnaC01g18250D/BnaC02g39310D/BnaC03g…	48
biological_process	GO:0000280	nuclear division	25/5096	200/76374	0.0019047	0.00560717	0.00290946	BnaA02g31160D/BnaA03g20700D/BnaA04g25600D/BnaA04g26100D/BnaA05g03800D/BnaA06g21560D/BnaA07g14820D/BnaA07g24060D/BnaA07g24070D/BnaA07g28400D/BnaA09g03730D/BnaA09g19860D/BnaC02g39720D/BnaC03g24730D/BnaC04g03410D/BnaC04g05300D/BnaC04g49500D/BnaC04g56890D/BnaC06g25120D/BnaC06g25130D/BnaC06g30940D/BnaC09g03160D/BnaC09g21860D/BnaCnng46660D/BnaCnng55190D	25
molecular_function	GO:0051082	unfolded protein binding	40/5096	370/76374	0.00192653	0.00565968	0.00293671	BnaA03g03740D/BnaA03g06130D/BnaA03g10790D/BnaA03g11100D/BnaA03g11140D/BnaA05g29880D/BnaA06g29720D/BnaA06g33590D/BnaA07g20150D/BnaA07g35200D/BnaA09g19450D/BnaA09g36670D/BnaA10g17840D/BnaA10g20610D/BnaA10g28400D/BnaA10g28410D/BnaAnng12790D/BnaAnng22000D/BnaAnng22010D/BnaC01g37030D/BnaC01g39690D/BnaC02g04180D/BnaC02g12680D/BnaC02g12750D/BnaC02g13140D/BnaC02g25950D/BnaC03g05240D/BnaC03g07870D/BnaC03g…	40
molecular_function	GO:0015271	outward rectifier potassium channel activity	7/5096	28/76374	0.00199358	0.00580844	0.0030139	BnaA01g21820D/BnaA03g11290D/BnaA10g09810D/BnaC01g28140D/BnaC03g00400D/BnaC03g71700D/BnaC09g32260D	7
cellular_component	GO:0031966	mitochondrial membrane	6/5096	21/76374	0.00199265	0.00580844	0.0030139	BnaA04g25760D/BnaA05g04080D/BnaC02g24100D/BnaC04g03820D/BnaC04g49670D/BnaC06g37290D	6
cellular_component	GO:0048471	perinuclear region of cytoplasm	7/5096	28/76374	0.00199358	0.00580844	0.0030139	BnaA01g17560D/BnaA01g27470D/BnaA08g07400D/BnaC01g21910D/BnaC01g44130D/BnaC03g53030D/BnaC09g13660D	7
biological_process	GO:0050821	protein stabilization	7/5096	28/76374	0.00199358	0.00580844	0.0030139	BnaA02g08820D/BnaA03g11100D/BnaA03g11140D/BnaC03g13470D/BnaC03g13870D/BnaC03g13930D/BnaC05g24360D	7
biological_process	GO:0009785	blue light signaling pathway	13/5096	79/76374	0.00211867	0.00616025	0.00319644	BnaA06g23000D/BnaA08g27870D/BnaA09g52380D/BnaA10g02550D/BnaAnng13370D/BnaC03g50450D/BnaC03g50460D/BnaC03g50470D/BnaC03g50480D/BnaC05g02520D/BnaC08g00670D/BnaC09g06130D/BnaC09g25510D	13
molecular_function	GO:0030234	enzyme regulator activity	11/5096	61/76374	0.00215805	0.0062619	0.00324918	BnaA01g12740D/BnaA03g45660D/BnaA08g23770D/BnaC01g14470D/BnaC04g05300D/BnaC07g37760D/BnaC08g16740D/BnaCnng23110D/BnaCnng55190D/BnaCnng59290D/BnaCnng76590D	11
biological_process	GO:0030422	production of siRNA involved in RNA interference	17/5096	118/76374	0.00217768	0.0062953	0.00326652	BnaA02g01670D/BnaA03g04360D/BnaA03g14360D/BnaA03g27390D/BnaA03g39000D/BnaA04g13160D/BnaC02g04790D/BnaC03g05900D/BnaC03g16170D/BnaC03g17420D/BnaC03g32410D/BnaC03g35740D/BnaC03g37110D/BnaC03g46120D/BnaC05g30160D/BnaC07g35230D/BnaCnng72250D	17
biological_process	GO:0031540	regulation of anthocyanin biosynthetic process	9/5096	44/76374	0.00217846	0.0062953	0.00326652	BnaA03g39820D/BnaA09g05500D/BnaA09g43560D/BnaAnng06660D/BnaC02g41870D/BnaC07g49790D/BnaC08g36160D/BnaCnng52780D/BnaCnng52790D	9
biological_process	GO:0006470	protein dephosphorylation	32/5096	280/76374	0.00218311	0.00629589	0.00326683	BnaA01g23280D/BnaA02g01670D/BnaA03g04360D/BnaA04g01980D/BnaA04g05650D/BnaA05g27980D/BnaA07g00650D/BnaA07g17860D/BnaA07g17880D/BnaA09g11370D/BnaA09g32630D/BnaA09g32650D/BnaA09g37450D/BnaA09g49440D/BnaA10g04610D/BnaAnng41430D/BnaC02g04790D/BnaC03g05900D/BnaC03g35740D/BnaC04g23560D/BnaC04g28370D/BnaC05g04960D/BnaC05g05180D/BnaC05g30160D/BnaC05g42210D/BnaC06g16610D/BnaC07g00870D/BnaC07g35230D/BnaC08g…	32
biological_process	GO:0007568	aging	22/5096	170/76374	0.00222888	0.00641482	0.00332853	BnaA01g01780D/BnaA01g06750D/BnaA02g22470D/BnaA02g35770D/BnaA03g31030D/BnaA03g50050D/BnaA04g07450D/BnaA07g24020D/BnaA07g28470D/BnaA08g29950D/BnaAnng23050D/BnaAnng37920D/BnaC01g02910D/BnaC01g08130D/BnaC03g36340D/BnaC03g36350D/BnaC03g67980D/BnaC04g29670D/BnaC06g25020D/BnaC06g31040D/BnaC08g07930D/BnaCnng49200D	22
biological_process	GO:0000913	preprophase band assembly	5/5096	15/76374	0.00224872	0.00641974	0.00333109	BnaA03g02940D/BnaA06g24330D/BnaC03g04340D/BnaC03g48940D/BnaC06g25970D	5
biological_process	GO:0007231	osmosensory signaling pathway	5/5096	15/76374	0.00224872	0.00641974	0.00333109	BnaA01g01630D/BnaA09g09310D/BnaAnng08310D/BnaC01g02670D/BnaC09g09570D	5
biological_process	GO:0033500	carbohydrate homeostasis	5/5096	15/76374	0.00224872	0.00641974	0.00333109	BnaA01g01630D/BnaA09g09310D/BnaAnng08310D/BnaC01g02670D/BnaC09g09570D	5
molecular_function	GO:0047724	inosine nucleosidase activity	5/5096	15/76374	0.00224872	0.00641974	0.00333109	BnaA03g16640D/BnaA05g07980D/BnaA06g18200D/BnaC03g20050D/BnaC04g08990D	5
biological_process	GO:0080147	root hair cell development	12/5096	71/76374	0.00245457	0.00699331	0.0036287	BnaA05g15840D/BnaA05g19110D/BnaA06g02800D/BnaA08g02130D/BnaC01g21580D/BnaC03g68660D/BnaC05g26650D/BnaC05g32490D/BnaC06g03640D/BnaC06g03650D/BnaC07g12240D/BnaCnng58160D	12
molecular_function	GO:0042803	protein homodimerization activity	49/5096	483/76374	0.00248856	0.00707592	0.00367157	BnaA01g02900D/BnaA02g32330D/BnaA03g13330D/BnaA03g21310D/BnaA03g51000D/BnaA04g10460D/BnaA04g12060D/BnaA05g01530D/BnaA05g33840D/BnaA06g05470D/BnaA06g08910D/BnaA06g27230D/BnaA06g29910D/BnaA06g39070D/BnaA07g15060D/BnaA08g27870D/BnaA09g02860D/BnaA09g48410D/BnaA10g00440D/BnaA10g02550D/BnaAnng13370D/BnaAnng30620D/BnaC01g04170D/BnaC01g10630D/BnaC02g18730D/BnaC02g41050D/BnaC03g16140D/BnaC03g25650D/BnaC04g…	49
molecular_function	GO:0003913	DNA photolyase activity	6/5096	22/76374	0.00258655	0.00733978	0.00380848	BnaA08g27870D/BnaA10g02550D/BnaAnng13370D/BnaC05g02520D/BnaC08g00670D/BnaC09g25510D	6
biological_process	GO:0006790	sulfur compound metabolic process	10/5096	54/76374	0.00275797	0.00781057	0.00405276	BnaA01g05350D/BnaA04g02570D/BnaA07g16900D/BnaA08g16710D/BnaA09g35930D/BnaC01g00210D/BnaC03g60380D/BnaC06g15970D/BnaC08g27420D/BnaCnng55070D	10
molecular_function	GO:0003746	translation elongation factor activity	20/5096	152/76374	0.00283324	0.00800771	0.00415506	BnaA02g06370D/BnaA02g06400D/BnaA03g08920D/BnaA05g11320D/BnaA06g04440D/BnaA09g49130D/BnaA09g49140D/BnaA09g49150D/BnaA09g49160D/BnaA10g23810D/BnaAnng15460D/BnaAnng31190D/BnaC03g71520D/BnaC03g71530D/BnaC04g13200D/BnaC05g05630D/BnaC08g43440D/BnaC08g43450D/BnaCnng38780D/BnaCnng69410D	20
cellular_component	GO:0005786	signal recognition particle, endoplasmic reticulum targeting	9/5096	46/76374	0.00300185	0.00836737	0.00434168	BnaA05g17060D/BnaA06g03460D/BnaA06g09990D/BnaA08g02950D/BnaC02g29710D/BnaC05g11610D/BnaC05g25860D/BnaC06g02320D/BnaC08g03210D	9
molecular_function	GO:0009973	adenylyl-sulfate reductase activity	4/5096	10/76374	0.00299856	0.00836737	0.00434168	BnaA01g11840D/BnaA03g45080D/BnaC01g13420D/BnaC07g37060D	4
molecular_function	GO:0010297	heteropolysaccharide binding	4/5096	10/76374	0.00299856	0.00836737	0.00434168	BnaA03g19240D/BnaA05g01890D/BnaC04g01600D/BnaC07g33260D	4
biological_process	GO:0019310	inositol catabolic process	4/5096	10/76374	0.00299856	0.00836737	0.00434168	BnaA07g00980D/BnaA09g10050D/BnaC07g01430D/BnaC09g10140D	4
biological_process	GO:0019637	organophosphate metabolic process	4/5096	10/76374	0.00299856	0.00836737	0.00434168	BnaA08g03520D/BnaC02g14750D/BnaC02g46400D/BnaC03g05300D	4
biological_process	GO:0051170	import into nucleus	4/5096	10/76374	0.00299856	0.00836737	0.00434168	BnaA08g04710D/BnaAnng39310D/BnaC05g51490D/BnaC08g05560D	4
biological_process	GO:0051938	L-glutamate import	4/5096	10/76374	0.00299856	0.00836737	0.00434168	BnaA06g14520D/BnaA07g11360D/BnaC05g15990D/BnaC07g15270D	4
biological_process	GO:0006997	nucleus organization	7/5096	30/76374	0.0030484	0.00848043	0.00440034	BnaA02g12980D/BnaA02g12990D/BnaA07g26250D/BnaA07g38730D/BnaA07g38740D/BnaC02g17300D/BnaC06g28300D	7
biological_process	GO:0009117	nucleotide metabolic process	20/5096	153/76374	0.00305901	0.00849324	0.00440699	BnaA01g35430D/BnaA02g17050D/BnaA02g26450D/BnaA03g36320D/BnaA03g41980D/BnaA06g13360D/BnaA07g21940D/BnaA07g31890D/BnaC01g17340D/BnaC01g22400D/BnaC01g26460D/BnaC02g34570D/BnaC03g42170D/BnaC03g76450D/BnaC04g44410D/BnaC05g14920D/BnaC06g22680D/BnaC06g35760D/BnaC07g33090D/BnaCnng08220D	20
cellular_component	GO:0031982	vesicle	5/5096	16/76374	0.00309236	0.00856905	0.00444633	BnaA10g26300D/BnaAnng00810D/BnaC02g02900D/BnaC03g01440D/BnaCnng10680D	5
molecular_function	GO:0004806	triglyceride lipase activity	17/5096	122/76374	0.00311107	0.00860404	0.00446448	BnaA03g01150D/BnaA08g27200D/BnaA09g51230D/BnaA10g16330D/BnaA10g26130D/BnaAnng00900D/BnaAnng08480D/BnaAnng08490D/BnaC02g02780D/BnaC02g08280D/BnaC02g08290D/BnaC03g01520D/BnaC03g01530D/BnaC08g46040D/BnaC09g39180D/BnaCnng10420D/BnaCnng20480D	17
biological_process	GO:0008284	positive regulation of cell population proliferation	34/5096	310/76374	0.00317996	0.00877744	0.00455445	BnaA01g12740D/BnaA01g20470D/BnaA02g00920D/BnaA03g00430D/BnaA03g24480D/BnaA03g24490D/BnaA03g45660D/BnaA03g49230D/BnaA05g29240D/BnaA06g29090D/BnaA06g40930D/BnaA09g22410D/BnaA10g21200D/BnaC01g14470D/BnaC01g25750D/BnaC03g00320D/BnaC03g29110D/BnaC03g52880D/BnaC07g37760D/BnaC07g49450D/BnaC08g20460D/BnaC08g20470D/BnaC09g45380D/BnaCnng20200D/BnaCnng23110D/BnaCnng24280D/BnaCnng25210D/BnaCnng25220D/BnaCnng…	34
biological_process	GO:0042594	response to starvation	6/5096	23/76374	0.00330388	0.00910174	0.00472273	BnaA04g00380D/BnaA07g19430D/BnaA09g40130D/BnaC04g21210D/BnaC06g18590D/BnaC08g32470D	6
biological_process	GO:0009805	coumarin biosynthetic process	33/5096	300/76374	0.00345545	0.00950082	0.00492981	BnaA02g19000D/BnaA03g24030D/BnaA05g34980D/BnaA06g08310D/BnaA07g18130D/BnaA07g32810D/BnaA07g34300D/BnaA07g34310D/BnaA07g34830D/BnaA08g06300D/BnaA09g10560D/BnaA09g10570D/BnaA09g12880D/BnaA09g47290D/BnaA10g18360D/BnaAnng37030D/BnaAnng38240D/BnaC02g24100D/BnaC02g25180D/BnaC03g07500D/BnaC03g28560D/BnaC05g09640D/BnaC06g17070D/BnaC06g37290D/BnaC06g39060D/BnaC06g39080D/BnaC06g39740D/BnaC08g06790D/BnaC08g…	33
biological_process	GO:0012501	programmed cell death	9/5096	47/76374	0.00349646	0.00959493	0.00497864	BnaA07g00920D/BnaA09g10080D/BnaAnng08250D/BnaC03g62540D/BnaC07g01200D/BnaC08g36510D/BnaC08g46860D/BnaC09g10170D/BnaCnng54530D	9
biological_process	GO:0019430	removal of superoxide radicals	11/5096	65/76374	0.00361806	0.00989223	0.0051329	BnaA04g16310D/BnaA06g05150D/BnaA09g35800D/BnaA09g48720D/BnaA10g16720D/BnaC03g51730D/BnaC04g39580D/BnaC05g06430D/BnaC08g27300D/BnaC08g42970D/BnaC09g39740D	11
biological_process	GO:0070838	divalent metal ion transport	36/5096	336/76374	0.00361877	0.00989223	0.0051329	BnaA01g11800D/BnaA01g30320D/BnaA02g14040D/BnaA03g32440D/BnaA04g04350D/BnaA04g11860D/BnaA06g12110D/BnaA06g12880D/BnaA06g14510D/BnaA07g11370D/BnaA07g15180D/BnaA08g21730D/BnaAnng17190D/BnaAnng17200D/BnaAnng22540D/BnaAnng30540D/BnaAnng37450D/BnaC01g13370D/BnaC01g38270D/BnaC02g18650D/BnaC03g13250D/BnaC03g28890D/BnaC03g37820D/BnaC03g76750D/BnaC04g26530D/BnaC04g33870D/BnaC05g13850D/BnaC05g15970D/BnaC05g…	36
cellular_component	GO:0005788	endoplasmic reticulum lumen	8/5096	39/76374	0.00371584	0.0100797	0.0052302	BnaA03g14210D/BnaA03g17100D/BnaA07g05610D/BnaA07g15650D/BnaC03g17190D/BnaC03g20620D/BnaC06g13860D/BnaC07g48050D	8
molecular_function	GO:0010427	abscisic acid binding	7/5096	31/76374	0.00371371	0.0100797	0.0052302	BnaA03g26790D/BnaA10g24990D/BnaAnng01330D/BnaAnng40650D/BnaC03g02130D/BnaC03g31730D/BnaC09g49910D	7
molecular_function	GO:0030151	molybdenum ion binding	7/5096	31/76374	0.00371371	0.0100797	0.0052302	BnaA02g18610D/BnaA07g20840D/BnaA07g33680D/BnaA07g33690D/BnaC06g20690D/BnaC06g38300D/BnaCnng60930D	7
biological_process	GO:0043562	cellular response to nitrogen levels	7/5096	31/76374	0.00371371	0.0100797	0.0052302	BnaA02g05310D/BnaA03g31030D/BnaA10g14420D/BnaAnng37920D/BnaC03g36340D/BnaC03g36350D/BnaC09g36760D	7
biological_process	GO:0006754	ATP biosynthetic process	16/5096	114/76374	0.0037681	0.010202	0.00529362	BnaA03g38140D/BnaA06g05910D/BnaA09g53530D/BnaA09g53550D/BnaA09g57160D/BnaA09g57270D/BnaAnng05310D/BnaAnng24780D/BnaC03g74390D/BnaC05g07470D/BnaC05g49250D/BnaC07g18200D/BnaC08g33950D/BnaC08g42380D/BnaCnng61530D/BnaCnng64550D	16
biological_process	GO:0019684	photosynthesis, light reaction	34/5096	314/76374	0.00389057	0.0105134	0.00545524	BnaA01g30320D/BnaA02g17050D/BnaA02g24310D/BnaA03g32440D/BnaA03g47820D/BnaA06g13360D/BnaA06g36180D/BnaA07g21940D/BnaA07g31890D/BnaA09g13310D/BnaA10g13400D/BnaA10g15850D/BnaAnng08760D/BnaAnng41330D/BnaC01g26460D/BnaC01g38270D/BnaC02g08620D/BnaC02g47130D/BnaC03g05300D/BnaC03g37820D/BnaC03g46500D/BnaC04g18310D/BnaC05g14920D/BnaC06g22680D/BnaC06g33840D/BnaC06g35760D/BnaC07g18860D/BnaC07g40090D/BnaC09g…	34
biological_process	GO:0044242	cellular lipid catabolic process	11/5096	66/76374	0.00408474	0.0110171	0.00571658	BnaA06g14510D/BnaA06g14520D/BnaA07g11360D/BnaA07g11370D/BnaA08g21730D/BnaC05g15970D/BnaC05g15990D/BnaC06g20690D/BnaC07g15270D/BnaC07g15280D/BnaC08g19360D	11
biological_process	GO:0010208	pollen wall assembly	5/5096	17/76374	0.00414222	0.0110459	0.00573152	BnaA03g03230D/BnaA06g27590D/BnaC03g04660D/BnaC05g27770D/BnaC07g29460D	5
biological_process	GO:0030308	negative regulation of cell growth	5/5096	17/76374	0.00414222	0.0110459	0.00573152	BnaA08g06640D/BnaA09g23850D/BnaAnng38690D/BnaC06g21530D/BnaC06g21540D	5
molecular_function	GO:0043682	copper transmembrane transporter activity, phosphorylative mechanism	5/5096	17/76374	0.00414222	0.0110459	0.00573152	BnaA09g53530D/BnaA09g53550D/BnaAnng05310D/BnaC07g18200D/BnaCnng61530D	5
biological_process	GO:0045836	positive regulation of meiotic nuclear division	5/5096	17/76374	0.00414222	0.0110459	0.00573152	BnaA03g19940D/BnaA05g03150D/BnaC03g23930D/BnaC03g23940D/BnaCnng35790D	5
biological_process	GO:0045927	positive regulation of growth	5/5096	17/76374	0.00414222	0.0110459	0.00573152	BnaA03g19940D/BnaA05g03150D/BnaC03g23930D/BnaC03g23940D/BnaCnng35790D	5
biological_process	GO:0048441	petal development	16/5096	115/76374	0.00411162	0.0110459	0.00573152	BnaA02g07220D/BnaA02g35830D/BnaA03g09630D/BnaA06g31880D/BnaA07g24360D/BnaA07g27710D/BnaA09g02150D/BnaA10g12220D/BnaA10g29100D/BnaC02g10210D/BnaC03g12150D/BnaC06g25500D/BnaC06g29980D/BnaC07g24710D/BnaC09g01550D/BnaC09g34450D	16
biological_process	GO:0006418	tRNA aminoacylation for protein translation	6/5096	24/76374	0.00415937	0.01105	0.00573366	BnaA10g17760D/BnaC04g01750D/BnaC07g19770D/BnaC08g13750D/BnaC09g41130D/BnaCnng35840D	6
molecular_function	GO:0008242	omega peptidase activity	6/5096	24/76374	0.00415937	0.01105	0.00573366	BnaA02g19000D/BnaA07g34300D/BnaA07g34310D/BnaC02g25180D/BnaC06g39060D/BnaC06g39080D	6
molecular_function	GO:0050113	inositol oxygenase activity	4/5096	11/76374	0.00446431	0.0118158	0.00613101	BnaA07g00980D/BnaA09g10050D/BnaC07g01430D/BnaC09g10140D	4
biological_process	GO:2000023	regulation of lateral root development	4/5096	11/76374	0.00446431	0.0118158	0.00613101	BnaA03g19400D/BnaA05g02120D/BnaC03g23250D/BnaC04g01790D	4
biological_process	GO:0032876	negative regulation of DNA endoreduplication	7/5096	32/76374	0.00448369	0.011845	0.00614615	BnaA07g32310D/BnaA08g06640D/BnaA09g23850D/BnaAnng38690D/BnaC06g21530D/BnaC06g21540D/BnaC06g36760D	7
molecular_function	GO:0003678	DNA helicase activity	12/5096	77/76374	0.00487335	0.0128504	0.00666784	BnaA03g19400D/BnaA03g26370D/BnaA05g02120D/BnaA08g04370D/BnaA09g00540D/BnaA10g27860D/BnaC03g23250D/BnaC03g31160D/BnaC04g01790D/BnaC06g00930D/BnaC08g46630D/BnaCnng01120D	12
molecular_function	GO:0051119	sugar transmembrane transporter activity	8/5096	41/76374	0.00512593	0.0134913	0.0070004	BnaA01g29190D/BnaA05g24790D/BnaA06g15180D/BnaA08g21340D/BnaC01g36600D/BnaC05g16660D/BnaC05g38830D/BnaCnng57120D	8
biological_process	GO:0006120	mitochondrial electron transport, NADH to ubiquinone	6/5096	25/76374	0.00516794	0.0135515	0.00703162	BnaA03g07390D/BnaA10g16190D/BnaAnng08530D/BnaC02g08330D/BnaC03g09360D/BnaC09g39050D	6
molecular_function	GO:0008106	alcohol dehydrogenase (NADP+) activity	6/5096	25/76374	0.00516794	0.0135515	0.00703162	BnaA05g06790D/BnaA05g06800D/BnaA09g54910D/BnaC04g53460D/BnaC04g53480D/BnaC08g24860D	6
biological_process	GO:0042325	regulation of phosphorylation	5/5096	18/76374	0.00542357	0.0141955	0.0073658	BnaA01g24050D/BnaA05g13880D/BnaAnng00670D/BnaC02g03070D/BnaCnng54820D	5
biological_process	GO:0009960	endosperm development	15/5096	109/76374	0.00593034	0.0154933	0.00803918	BnaA01g12740D/BnaA03g20700D/BnaA03g45660D/BnaA04g25600D/BnaA05g03800D/BnaC01g14470D/BnaC03g24730D/BnaC04g03410D/BnaC04g05300D/BnaC04g49500D/BnaC07g37760D/BnaCnng23110D/BnaCnng55190D/BnaCnng59290D/BnaCnng76590D	15
molecular_function	GO:0008553	proton-exporting ATPase activity, phosphorylative mechanism	8/5096	42/76374	0.00596837	0.0155639	0.00807584	BnaA04g27340D/BnaA07g19970D/BnaA07g35430D/BnaA09g38390D/BnaC04g22140D/BnaC06g19400D/BnaC06g40340D/BnaC08g30540D	8
molecular_function	GO:0005366	myo-inositol:proton symporter activity	4/5096	12/76374	0.00634532	0.0163363	0.00847662	BnaA04g25030D/BnaA05g03260D/BnaC04g02870D/BnaC04g48870D	4
biological_process	GO:0006779	porphyrin-containing compound biosynthetic process	4/5096	12/76374	0.00634532	0.0163363	0.00847662	BnaA10g01010D/BnaA10g19460D/BnaC05g01120D/BnaC09g54390D	4
biological_process	GO:0009584	detection of visible light	4/5096	12/76374	0.00634532	0.0163363	0.00847662	BnaA06g05470D/BnaA09g48410D/BnaC08g42660D/BnaCnng19880D	4
biological_process	GO:0009943	adaxial/abaxial axis specification	4/5096	12/76374	0.00634532	0.0163363	0.00847662	BnaA03g22070D/BnaA04g16520D/BnaC03g26450D/BnaC04g39860D	4
biological_process	GO:0017006	protein-tetrapyrrole linkage	4/5096	12/76374	0.00634532	0.0163363	0.00847662	BnaA06g05470D/BnaA09g48410D/BnaC08g42660D/BnaCnng19880D	4
molecular_function	GO:0048037	cofactor binding	6/5096	26/76374	0.00634461	0.0163363	0.00847662	BnaA03g29700D/BnaA10g00440D/BnaAnng41330D/BnaC03g34940D/BnaC05g00510D/BnaC06g33840D	6
biological_process	GO:0048578	positive regulation of long-day photoperiodism, flowering	4/5096	12/76374	0.00634532	0.0163363	0.00847662	BnaA08g18270D/BnaA09g27210D/BnaC03g58740D/BnaC05g21930D	4
molecular_function	GO:0009011	starch synthase activity	7/5096	34/76374	0.00637719	0.0163886	0.00850373	BnaA02g16660D/BnaA07g31170D/BnaAnng38950D/BnaC02g22570D/BnaC05g28320D/BnaC05g28330D/BnaC06g34860D	7
molecular_function	GO:0004607	phosphatidylcholine-sterol O-acyltransferase activity	5/5096	19/76374	0.00696118	0.0178569	0.00926564	BnaA01g10270D/BnaA03g44190D/BnaA03g44270D/BnaC01g41270D/BnaC07g36060D	5
biological_process	GO:0009628	response to abiotic stimulus	9/5096	52/76374	0.00699818	0.0179194	0.00929805	BnaA01g15720D/BnaA09g27310D/BnaA10g07970D/BnaC03g46500D/BnaC05g51190D/BnaC07g19770D/BnaC08g07090D/BnaC09g07480D/BnaC09g27850D	9
biological_process	GO:0010093	specification of floral organ identity	20/5096	165/76374	0.00715303	0.0182828	0.00948663	BnaA01g22200D/BnaA01g34730D/BnaA02g35830D/BnaA03g22980D/BnaA03g24650D/BnaA03g53830D/BnaA03g54540D/BnaA07g24360D/BnaA07g27710D/BnaA09g13310D/BnaC01g01710D/BnaC01g43070D/BnaC03g27100D/BnaC06g25500D/BnaC06g29980D/BnaC08g34130D/BnaC09g13580D/BnaCnng39690D/BnaCnng41250D/BnaCnng60530D	20
biological_process	GO:0019760	glucosinolate metabolic process	11/5096	71/76374	0.00718293	0.0183262	0.00950913	BnaA06g37230D/BnaA08g16820D/BnaA10g13400D/BnaA10g26450D/BnaAnng40850D/BnaC01g00070D/BnaC03g60280D/BnaC07g47470D/BnaC09g53990D/BnaC09g54000D/BnaCnng02680D	11
molecular_function	GO:0005200	structural constituent of cytoskeleton	17/5096	133/76374	0.00749186	0.01908	0.00990027	BnaA01g19850D/BnaA02g07080D/BnaA03g09510D/BnaA06g18020D/BnaA06g20460D/BnaA08g00100D/BnaA10g10340D/BnaA10g12390D/BnaAnng20990D/BnaC02g10000D/BnaC02g12420D/BnaC03g12030D/BnaC03g55960D/BnaC03g75050D/BnaC09g34680D/BnaCnng21560D/BnaCnng21570D	17
biological_process	GO:0007276	gamete generation	10/5096	62/76374	0.00764006	0.0194225	0.010078	BnaA01g36280D/BnaA07g34360D/BnaAnng00170D/BnaC01g29930D/BnaC03g70510D/BnaC04g26900D/BnaC04g32030D/BnaC06g39190D/BnaC08g37030D/BnaC08g47970D	10
biological_process	GO:0006564	L-serine biosynthetic process	6/5096	27/76374	0.00770431	0.0195507	0.0101445	BnaA06g25700D/BnaA06g25710D/BnaA08g14930D/BnaA09g09210D/BnaC03g62400D/BnaC09g09440D	6
biological_process	GO:0071456	cellular response to hypoxia	13/5096	92/76374	0.00803585	0.0203556	0.0105621	BnaA03g22890D/BnaA07g23090D/BnaA07g30130D/BnaA09g57020D/BnaAnng22270D/BnaAnng33930D/BnaAnng39350D/BnaC02g44430D/BnaC03g26940D/BnaC05g49640D/BnaC06g24360D/BnaC06g33570D/BnaC08g39510D	13
biological_process	GO:0009954	proximal/distal pattern formation	10/5096	63/76374	0.00855092	0.0216216	0.0112191	BnaA01g00360D/BnaA03g21310D/BnaA03g54130D/BnaA04g17700D/BnaA05g01530D/BnaA06g37740D/BnaC03g25650D/BnaC04g01060D/BnaC04g41340D/BnaC07g46630D	10
molecular_function	GO:0003896	DNA primase activity	4/5096	13/76374	0.0086861	0.0218077	0.0113156	BnaA02g13060D/BnaA07g25090D/BnaA10g06620D/BnaC02g45630D	4
molecular_function	GO:0008020	G protein-coupled photoreceptor activity	4/5096	13/76374	0.0086861	0.0218077	0.0113156	BnaA06g05470D/BnaA09g48410D/BnaC08g42660D/BnaCnng19880D	4
cellular_component	GO:0010445	nuclear dicing body	4/5096	13/76374	0.0086861	0.0218077	0.0113156	BnaA03g08110D/BnaA10g14710D/BnaC03g10290D/BnaC09g37040D	4
biological_process	GO:0010480	microsporocyte differentiation	4/5096	13/76374	0.0086861	0.0218077	0.0113156	BnaA03g37260D/BnaA07g05790D/BnaC03g43570D/BnaC09g21440D	4
biological_process	GO:0006665	sphingolipid metabolic process	5/5096	20/76374	0.00877896	0.0219601	0.0113947	BnaA03g57960D/BnaA09g32260D/BnaA09g32270D/BnaC07g32480D/BnaC08g23050D	5
biological_process	GO:0006828	manganese ion transport	7/5096	36/76374	0.00880884	0.0219601	0.0113947	BnaA06g05910D/BnaA09g57160D/BnaA09g57270D/BnaC05g07470D/BnaC05g49250D/BnaC08g42380D/BnaCnng70270D	7
biological_process	GO:0009395	phospholipid catabolic process	5/5096	20/76374	0.00877896	0.0219601	0.0113947	BnaA01g10270D/BnaA03g44190D/BnaA03g44270D/BnaC01g41270D/BnaC07g36060D	5
biological_process	GO:0010325	raffinose family oligosaccharide biosynthetic process	7/5096	36/76374	0.00880884	0.0219601	0.0113947	BnaA04g10260D/BnaA08g00340D/BnaA09g20650D/BnaC03g70760D/BnaC03g70770D/BnaC04g56100D/BnaC07g27790D	7
cellular_component	GO:0012511	monolayer-surrounded lipid storage body	9/5096	54/76374	0.00897786	0.0223421	0.0115929	BnaA02g35480D/BnaA03g01150D/BnaA10g26130D/BnaAnng00900D/BnaC02g02780D/BnaC02g12490D/BnaC03g01520D/BnaC03g01530D/BnaCnng10420D	9
biological_process	GO:0046482	para-aminobenzoic acid metabolic process	21/5096	180/76374	0.00911504	0.0226437	0.0117494	BnaA03g02040D/BnaA03g33660D/BnaA04g05980D/BnaA05g24540D/BnaA05g34880D/BnaA10g23880D/BnaAnng13720D/BnaAnng30320D/BnaAnng41330D/BnaC02g01610D/BnaC03g03050D/BnaC03g38830D/BnaC04g28590D/BnaC04g53550D/BnaC04g53560D/BnaC04g53580D/BnaC05g31580D/BnaC05g38540D/BnaC06g33840D/BnaC09g03800D/BnaC09g47860D	21
biological_process	GO:0071365	cellular response to auxin stimulus	8/5096	45/76374	0.00913128	0.0226443	0.0117497	BnaA01g13250D/BnaA01g13260D/BnaA03g46050D/BnaC01g15070D/BnaC03g44000D/BnaC07g38370D/BnaCnng22650D/BnaUnng04040D	8
biological_process	GO:0009961	response to 1-aminocyclopropane-1-carboxylic acid	6/5096	28/76374	0.00926179	0.0228878	0.0118761	BnaA05g18680D/BnaA08g04640D/BnaA10g08890D/BnaAnng29790D/BnaC06g00520D/BnaCnng21000D	6
biological_process	GO:0010098	suspensor development	6/5096	28/76374	0.00926179	0.0228878	0.0118761	BnaA03g08110D/BnaA09g00710D/BnaA10g14710D/BnaC03g10290D/BnaC09g37040D/BnaCnng23260D	6
biological_process	GO:0010431	seed maturation	16/5096	126/76374	0.00986533	0.0243368	0.0126279	BnaA05g16000D/BnaA06g08910D/BnaA06g29670D/BnaA06g37720D/BnaA08g02300D/BnaA09g00710D/BnaAnng30620D/BnaC02g31640D/BnaC04g05300D/BnaC05g10230D/BnaC05g50600D/BnaC06g03160D/BnaC07g27090D/BnaCnng23260D/BnaCnng55190D/BnaCnng72060D	16
biological_process	GO:0019762	glucosinolate catabolic process	9/5096	55/76374	0.0101137	0.0248628	0.0129009	BnaA01g12740D/BnaA03g45660D/BnaC01g14470D/BnaC04g05300D/BnaC07g37760D/BnaCnng23110D/BnaCnng55190D/BnaCnng59290D/BnaCnng76590D	9
biological_process	GO:0031537	regulation of anthocyanin metabolic process	9/5096	55/76374	0.0101137	0.0248628	0.0129009	BnaA03g34300D/BnaA03g34320D/BnaA05g23050D/BnaC01g44050D/BnaC01g44060D/BnaC03g39750D/BnaC05g36490D/BnaCnng27490D/BnaCnng27500D	9
molecular_function	GO:0016168	chlorophyll binding	16/5096	127/76374	0.0106068	0.02603	0.0135065	BnaA01g24440D/BnaA02g29010D/BnaA03g36810D/BnaA03g37990D/BnaA05g16860D/BnaA06g31910D/BnaA09g02120D/BnaC02g37040D/BnaC03g44110D/BnaC05g29670D/BnaC06g20460D/BnaC07g24660D/BnaC09g01520D/BnaCnng14300D/BnaCnng37300D/BnaCnng53960D	16
molecular_function	GO:0008094	DNA-dependent ATPase activity	11/5096	75/76374	0.0107811	0.0264118	0.0137046	BnaA03g26370D/BnaA03g38540D/BnaA08g04370D/BnaA09g00540D/BnaA10g27860D/BnaC01g08290D/BnaC03g31160D/BnaC03g45350D/BnaC06g00930D/BnaC08g46630D/BnaCnng01120D	11
molecular_function	GO:0004372	glycine hydroxymethyltransferase activity	6/5096	29/76374	0.0110314	0.0269319	0.0139745	BnaA04g06460D/BnaA09g13310D/BnaAnng08840D/BnaC09g13580D/BnaCnng19300D/BnaCnng62500D	6
biological_process	GO:0006559	L-phenylalanine catabolic process	6/5096	29/76374	0.0110314	0.0269319	0.0139745	BnaA02g09890D/BnaA05g12790D/BnaA09g43670D/BnaC02g13840D/BnaC06g11940D/BnaC08g36300D	6
biological_process	GO:0006655	phosphatidylglycerol biosynthetic process	28/5096	265/76374	0.0111872	0.0272653	0.0141475	BnaA01g01630D/BnaA01g35430D/BnaA03g36320D/BnaA03g41980D/BnaA03g48990D/BnaA06g22280D/BnaA08g13880D/BnaA09g06230D/BnaA09g09310D/BnaA09g11320D/BnaA09g11790D/BnaA10g13400D/BnaAnng08310D/BnaC01g02670D/BnaC01g22400D/BnaC03g42170D/BnaC03g51460D/BnaC04g20580D/BnaC07g33090D/BnaC07g41200D/BnaC08g12860D/BnaC09g09570D/BnaC09g11760D/BnaC09g12520D/BnaC09g50930D/BnaC09g53990D/BnaC09g54000D/BnaCnng76470D	28
biological_process	GO:0010599	production of lsiRNA involved in RNA interference	4/5096	14/76374	0.0115262	0.0278993	0.0144764	BnaA03g08110D/BnaA10g14710D/BnaC03g10290D/BnaC09g37040D	4
biological_process	GO:0019419	sulfate reduction	4/5096	14/76374	0.0115262	0.0278993	0.0144764	BnaA01g11840D/BnaA03g45080D/BnaC01g13420D/BnaC07g37060D	4
biological_process	GO:0031539	positive regulation of anthocyanin metabolic process	4/5096	14/76374	0.0115262	0.0278993	0.0144764	BnaA02g00920D/BnaA10g21200D/BnaC09g45380D/BnaCnng20200D	4
biological_process	GO:1902000	homogentisate catabolic process	4/5096	14/76374	0.0115262	0.0278993	0.0144764	BnaA02g09890D/BnaA10g07180D/BnaC02g13840D/BnaCnng14590D	4
molecular_function	GO:0004197	cysteine-type endopeptidase activity	12/5096	86/76374	0.0116981	0.0282672	0.0146673	BnaA01g05320D/BnaA02g34110D/BnaA06g23360D/BnaA07g34830D/BnaA08g16740D/BnaC01g00170D/BnaC02g48830D/BnaC03g49950D/BnaC04g47950D/BnaC06g39740D/BnaC07g09190D/BnaCnng71840D	12
biological_process	GO:0030007	cellular potassium ion homeostasis	7/5096	38/76374	0.0118587	0.0286063	0.0148433	BnaA01g21820D/BnaA03g11290D/BnaA10g09810D/BnaC01g28140D/BnaC03g71700D/BnaC09g32260D/BnaC09g46450D	7
biological_process	GO:0000103	sulfate assimilation	10/5096	67/76374	0.0130482	0.0313157	0.0162491	BnaA01g11840D/BnaA03g45080D/BnaA04g26100D/BnaA07g14820D/BnaA10g03820D/BnaC01g13420D/BnaC04g56890D/BnaC05g03730D/BnaC07g37060D/BnaCnng46660D	10
biological_process	GO:0006783	heme biosynthetic process	10/5096	67/76374	0.0130482	0.0313157	0.0162491	BnaA04g25770D/BnaA05g08630D/BnaA07g12950D/BnaA09g24370D/BnaC04g09710D/BnaC04g17180D/BnaC04g49680D/BnaC05g24530D/BnaC05g28770D/BnaCnng60440D	10
molecular_function	GO:0046982	protein heterodimerization activity	42/5096	440/76374	0.0130391	0.0313157	0.0162491	BnaA01g28930D/BnaA02g31000D/BnaA02g32330D/BnaA02g35830D/BnaA03g21310D/BnaA03g33890D/BnaA05g01530D/BnaA05g24050D/BnaA06g25370D/BnaA06g27230D/BnaA06g29270D/BnaA06g29500D/BnaA06g36810D/BnaA07g01890D/BnaA07g19330D/BnaA07g24360D/BnaA07g27710D/BnaA09g02860D/BnaA09g03330D/BnaA09g09500D/BnaA09g39870D/BnaC01g10630D/BnaC01g36040D/BnaC02g18730D/BnaC02g39310D/BnaC02g41050D/BnaC03g25650D/BnaC03g39160D/BnaC04g…	42
molecular_function	GO:0003985	acetyl-CoA C-acetyltransferase activity	5/5096	22/76374	0.0133447	0.0319191	0.0165623	BnaA02g21580D/BnaA09g21330D/BnaC09g23740D/BnaCnng23810D/BnaCnng45000D	5
biological_process	GO:0048838	release of seed from dormancy	5/5096	22/76374	0.0133447	0.0319191	0.0165623	BnaA01g23280D/BnaA09g49440D/BnaA10g04840D/BnaC05g05180D/BnaC06g06590D	5
biological_process	GO:0009567	double fertilization forming a zygote and endosperm	13/5096	98/76374	0.0133865	0.031965	0.016586	BnaA02g12120D/BnaA03g21800D/BnaA05g00500D/BnaA07g03120D/BnaA07g25280D/BnaA07g25290D/BnaC02g13730D/BnaC03g26070D/BnaC04g27450D/BnaC04g51940D/BnaC06g27060D/BnaC07g06200D/BnaC09g44920D	13
biological_process	GO:0009060	aerobic respiration	20/5096	176/76374	0.0140631	0.0335241	0.0173951	BnaA02g01610D/BnaA03g04310D/BnaA03g06020D/BnaA04g03580D/BnaA04g03590D/BnaA07g37840D/BnaA08g02750D/BnaA09g35020D/BnaA09g35800D/BnaA10g19920D/BnaC02g04730D/BnaC03g05850D/BnaC03g07200D/BnaC03g07770D/BnaC04g25470D/BnaC04g25490D/BnaC05g47450D/BnaC08g26250D/BnaC08g27300D/BnaC09g43670D	20
biological_process	GO:0010154	fruit development	10/5096	68/76374	0.014408	0.0342886	0.0177917	BnaA02g26000D/BnaA03g39820D/BnaA09g05500D/BnaAnng06660D/BnaAnng35740D/BnaC02g34110D/BnaC02g41870D/BnaC07g49790D/BnaCnng52780D/BnaCnng52790D	10
biological_process	GO:0000303	response to superoxide	18/5096	154/76374	0.0146742	0.0348636	0.0180901	BnaA01g36840D/BnaA02g23620D/BnaA03g35930D/BnaA05g20140D/BnaA05g20160D/BnaA06g01320D/BnaA08g00900D/BnaA08g02070D/BnaA09g53530D/BnaA09g53550D/BnaAnng05310D/BnaC01g32460D/BnaC03g41740D/BnaC03g78230D/BnaC05g31510D/BnaC06g06890D/BnaC07g18200D/BnaCnng61530D	18
molecular_function	GO:0008934	inositol monophosphate 1-phosphatase activity	4/5096	15/76374	0.0148998	0.0349307	0.0181249	BnaA01g05350D/BnaA08g16710D/BnaC01g00210D/BnaC03g60380D	4
cellular_component	GO:0009346	citrate lyase complex	4/5096	15/76374	0.0148998	0.0349307	0.0181249	BnaA08g26390D/BnaA08g26420D/BnaCnng06880D/BnaCnng53790D	4
biological_process	GO:0010288	response to lead ion	4/5096	15/76374	0.0148998	0.0349307	0.0181249	BnaA06g28150D/BnaA09g04320D/BnaC07g49560D/BnaC09g03730D	4
biological_process	GO:0042546	cell wall biogenesis	20/5096	177/76374	0.0148893	0.0349307	0.0181249	BnaA01g13540D/BnaA01g34810D/BnaA03g00140D/BnaA03g51630D/BnaA06g18630D/BnaA07g15330D/BnaA07g34940D/BnaA09g00970D/BnaAnng03530D/BnaAnng20270D/BnaC01g06870D/BnaC01g15760D/BnaC03g07070D/BnaC03g55190D/BnaC03g77270D/BnaC06g39870D/BnaC06g42320D/BnaC07g38610D/BnaC09g00080D/BnaCnng40650D	20
molecular_function	GO:0046592	polyamine oxidase activity	4/5096	15/76374	0.0148998	0.0349307	0.0181249	BnaA03g04460D/BnaA07g18130D/BnaC03g06000D/BnaC06g17070D	4
biological_process	GO:0051693	actin filament capping	4/5096	15/76374	0.0148998	0.0349307	0.0181249	BnaA03g29040D/BnaAnng02460D/BnaAnng02650D/BnaC03g34290D	4
biological_process	GO:0090342	regulation of cell aging	4/5096	15/76374	0.0148998	0.0349307	0.0181249	BnaA01g01100D/BnaA08g15400D/BnaC01g02130D/BnaC03g61840D	4
biological_process	GO:2000693	positive regulation of seed maturation	4/5096	15/76374	0.0148998	0.0349307	0.0181249	BnaA07g19330D/BnaA09g39870D/BnaC06g18530D/BnaC08g32220D	4
biological_process	GO:0006563	L-serine metabolic process	6/5096	31/76374	0.0152624	0.0357216	0.0185353	BnaA04g06460D/BnaA09g13310D/BnaAnng08840D/BnaC09g13580D/BnaCnng19300D/BnaCnng62500D	6
cellular_component	GO:0030126	COPI vesicle coat	10/5096	69/76374	0.0158708	0.0370842	0.0192423	BnaA06g40490D/BnaA08g16430D/BnaA09g43220D/BnaC01g14550D/BnaC04g34740D/BnaC07g47060D/BnaC08g35740D/BnaC08g35750D/BnaC08g35770D/BnaC09g46600D	10
molecular_function	GO:0004108	citrate (Si)-synthase activity	5/5096	23/76374	0.0161338	0.0373904	0.0194012	BnaA05g03040D/BnaA05g03050D/BnaA05g03080D/BnaA07g08220D/BnaC04g52580D	5
biological_process	GO:0009904	chloroplast accumulation movement	5/5096	23/76374	0.0161338	0.0373904	0.0194012	BnaA03g02940D/BnaA06g24330D/BnaC03g04340D/BnaC03g48940D/BnaC06g25970D	5
biological_process	GO:0010449	root meristem growth	5/5096	23/76374	0.0161338	0.0373904	0.0194012	BnaA03g18970D/BnaA03g23570D/BnaC03g27960D/BnaC03g72510D/BnaCnng27900D	5
biological_process	GO:0051716	cellular response to stimulus	5/5096	23/76374	0.0161338	0.0373904	0.0194012	BnaA03g16650D/BnaA04g04240D/BnaA05g07970D/BnaC06g14100D/BnaC08g24010D	5
biological_process	GO:2000038	regulation of stomatal complex development	5/5096	23/76374	0.0161338	0.0373904	0.0194012	BnaA08g06640D/BnaA09g23850D/BnaAnng38690D/BnaC06g21530D/BnaC06g21540D	5
biological_process	GO:0008295	spermidine biosynthetic process	9/5096	60/76374	0.0174742	0.0404305	0.0209787	BnaA03g05780D/BnaA09g48390D/BnaA10g18360D/BnaC03g07500D/BnaC08g13740D/BnaC08g13750D/BnaC08g42640D/BnaC09g41900D/BnaCnng19820D	9
biological_process	GO:0000719	photoreactive repair	4/5096	16/76374	0.0188356	0.0432274	0.0224299	BnaA03g06870D/BnaA10g16760D/BnaC03g08770D/BnaC09g39780D	4
molecular_function	GO:0005355	glucose transmembrane transporter activity	4/5096	16/76374	0.0188356	0.0432274	0.0224299	BnaA01g26430D/BnaC01g33830D/BnaC03g73840D/BnaC08g42000D	4
biological_process	GO:0018106	peptidyl-histidine phosphorylation	4/5096	16/76374	0.0188356	0.0432274	0.0224299	BnaA06g05470D/BnaA09g48410D/BnaC08g42660D/BnaCnng19880D	4
biological_process	GO:0019676	ammonia assimilation cycle	4/5096	16/76374	0.0188356	0.0432274	0.0224299	BnaA04g07450D/BnaA08g29950D/BnaC04g29670D/BnaC08g07930D	4
cellular_component	GO:0048196	obsolete plant extracellular matrix	4/5096	16/76374	0.0188356	0.0432274	0.0224299	BnaA01g06940D/BnaA03g49910D/BnaA03g53100D/BnaC01g08350D	4
cellular_component	GO:0008250	oligosaccharyltransferase complex	5/5096	24/76374	0.019285	0.0440445	0.0228539	BnaA02g34720D/BnaA07g12390D/BnaA09g07760D/BnaC07g16630D/BnaC09g07890D	5
biological_process	GO:0033523	histone H2B ubiquitination	5/5096	24/76374	0.019285	0.0440445	0.0228539	BnaA02g26550D/BnaA06g34030D/BnaA09g19140D/BnaC02g34760D/BnaC07g21870D	5
biological_process	GO:0043255	regulation of carbohydrate biosynthetic process	5/5096	24/76374	0.019285	0.0440445	0.0228539	BnaA03g55200D/BnaAnng01240D/BnaC02g02440D/BnaC03g02050D/BnaCnng46970D	5
molecular_function	GO:0008134	transcription factor binding	9/5096	61/76374	0.0193206	0.0440548	0.0228592	BnaA01g02900D/BnaA03g07230D/BnaA03g51000D/BnaA10g16320D/BnaAnng08500D/BnaC01g04170D/BnaC02g08300D/BnaC03g09150D/BnaC09g39170D	9
biological_process	GO:0051607	defense response to virus	20/5096	183/76374	0.0206769	0.0470715	0.0244246	BnaA04g12720D/BnaA05g17060D/BnaA06g03460D/BnaA06g09990D/BnaA06g21840D/BnaA06g35980D/BnaA08g02950D/BnaA09g42760D/BnaA10g22070D/BnaC02g29710D/BnaC02g48260D/BnaC03g74950D/BnaC04g34650D/BnaC05g11610D/BnaC05g25860D/BnaC06g02320D/BnaC07g19140D/BnaC08g03210D/BnaC08g35240D/BnaC09g46450D	20
biological_process	GO:0010214	seed coat development	9/5096	62/76374	0.0213041	0.0484216	0.0251251	BnaA01g05450D/BnaA02g30740D/BnaA02g30890D/BnaA09g03310D/BnaC01g00330D/BnaC02g39030D/BnaC02g39150D/BnaC07g27160D/BnaC09g02680D	9

## Sheet: Table S6
Table S6. The KEGG analysis results.
ID	Description	GeneRatio	BgRatio	pvalue	p.adjust	qvalue	geneID	Count
ko00051	Fructose and mannose metabolism	161/3079	253/33115	1.92134e-101	2.09426e-99	1.07191e-99	BnaA01g00240D/BnaA01g07610D/BnaA01g32870D/BnaA02g08550D/BnaA02g17020D/BnaA02g35210D/BnaA02g35220D/BnaA03g10690D/BnaA03g12920D/BnaA03g13000D/BnaA03g14420D/BnaA03g24290D/BnaA03g40360D/BnaA04g01640D/BnaA04g03580D/BnaA04g03590D/BnaA04g04350D/BnaA04g12000D/BnaA04g12070D/BnaA04g18320D/BnaA05g10520D/BnaA05g11350D/BnaA05g15840D/BnaA05g19110D/BnaA05g33470D/BnaA06g02800D/BnaA06g03380D/BnaA06g08370D/BnaA06g…	161
ko00052	Galactose metabolism	141/3079	201/33115	6.98126e-98	3.80479e-96	1.94741e-96	BnaA01g00240D/BnaA01g07610D/BnaA01g13540D/BnaA01g34430D/BnaA01g37220D/BnaA02g04780D/BnaA02g08550D/BnaA03g02510D/BnaA03g03670D/BnaA03g06500D/BnaA03g10690D/BnaA03g16550D/BnaA03g28980D/BnaA03g40360D/BnaA03g55140D/BnaA04g05320D/BnaA04g10260D/BnaA04g12070D/BnaA04g26930D/BnaA05g00720D/BnaA05g15840D/BnaA05g19110D/BnaA05g25600D/BnaA05g25610D/BnaA05g32480D/BnaA06g00510D/BnaA06g02800D/BnaA06g03380D/BnaA06g…	141
ko00030	Pentose phosphate pathway	132/3079	220/33115	1.55643e-78	5.65502e-77	2.89441e-77	BnaA01g07610D/BnaA01g13990D/BnaA01g19820D/BnaA02g01610D/BnaA02g08550D/BnaA03g04190D/BnaA03g04310D/BnaA03g10690D/BnaA03g40360D/BnaA03g46830D/BnaA03g55140D/BnaA04g01120D/BnaA04g04350D/BnaA04g25770D/BnaA05g04720D/BnaA05g08630D/BnaA05g10520D/BnaA05g12970D/BnaA06g03380D/BnaA06g08320D/BnaA06g08370D/BnaA06g08730D/BnaA06g32220D/BnaA06g35220D/BnaA06g37230D/BnaA07g15160D/BnaA07g18800D/BnaA08g02750D/BnaA08g…	132
ko00010	Glycolysis / Gluconeogenesis	178/3079	470/33115	4.36726e-64	1.19008e-62	6.09118e-63	BnaA01g00210D/BnaA01g00240D/BnaA01g01360D/BnaA01g07610D/BnaA01g13990D/BnaA01g20680D/BnaA01g30320D/BnaA01g33660D/BnaA02g08550D/BnaA03g02560D/BnaA03g10690D/BnaA03g32440D/BnaA03g40360D/BnaA03g46830D/BnaA03g54330D/BnaA03g55140D/BnaA03g59170D/BnaA04g03580D/BnaA04g03590D/BnaA04g04350D/BnaA04g05070D/BnaA04g12000D/BnaA05g10520D/BnaA05g15840D/BnaA05g19110D/BnaA05g29640D/BnaA05g33200D/BnaA05g35800D/BnaA06g…	178
ko00900	Terpenoid backbone biosynthesis	102/3079	229/33115	1.01907e-44	2.22156e-43	1.13706e-43	BnaA01g35430D/BnaA02g07460D/BnaA02g21580D/BnaA02g26450D/BnaA02g31160D/BnaA03g06020D/BnaA03g15920D/BnaA03g36320D/BnaA03g41980D/BnaA04g10140D/BnaA04g11810D/BnaA05g09170D/BnaA06g22280D/BnaA07g02540D/BnaA07g12950D/BnaA07g32810D/BnaA08g03520D/BnaA09g03730D/BnaA09g06230D/BnaA09g11320D/BnaA09g11790D/BnaA09g21330D/BnaA09g24970D/BnaA10g13400D/BnaA10g21120D/BnaAnng13430D/BnaAnng13440D/BnaAnng37030D/BnaC01g…	102
ko00710	Carbon fixation in photosynthetic organisms	100/3079	292/33115	3.70531e-32	6.73132e-31	3.44529e-31	BnaA01g00210D/BnaA01g30320D/BnaA01g33660D/BnaA02g12810D/BnaA02g12840D/BnaA03g03400D/BnaA03g32440D/BnaA03g54330D/BnaA04g01120D/BnaA04g03360D/BnaA04g03580D/BnaA04g03590D/BnaA04g04350D/BnaA04g08570D/BnaA04g08640D/BnaA04g12000D/BnaA05g04720D/BnaA05g10520D/BnaA05g33200D/BnaA06g07900D/BnaA06g07910D/BnaA06g20580D/BnaA06g24600D/BnaA06g24610D/BnaA06g27940D/BnaA06g37230D/BnaA06g38600D/BnaA07g16660D/BnaA07g…	100
ko00524	Neomycin, kanamycin and gentamicin biosynthesis	23/3079	23/33115	1.7394e-24	2.70849e-23	1.38629e-23	BnaA01g00240D/BnaA05g15840D/BnaA05g19110D/BnaA06g02800D/BnaA07g00920D/BnaA08g02130D/BnaA08g15820D/BnaA09g10080D/BnaA10g05030D/BnaC01g01180D/BnaC01g21580D/BnaC03g61220D/BnaC03g68660D/BnaC05g26650D/BnaC05g32490D/BnaC06g01220D/BnaC06g03640D/BnaC06g03650D/BnaC07g01200D/BnaC07g12240D/BnaC08g36510D/BnaC09g10170D/BnaCnng58160D	23
ko00630	Glyoxylate and dicarboxylate metabolism	87/3079	326/33115	6.93722e-20	9.45196e-19	4.8378e-19	BnaA01g29420D/BnaA02g03140D/BnaA02g12430D/BnaA02g12810D/BnaA02g12840D/BnaA02g19770D/BnaA03g33370D/BnaA03g34780D/BnaA03g53180D/BnaA04g06460D/BnaA04g07450D/BnaA04g08160D/BnaA04g08570D/BnaA04g08640D/BnaA05g03040D/BnaA05g03050D/BnaA05g03080D/BnaA05g22420D/BnaA05g25060D/BnaA06g03770D/BnaA06g07900D/BnaA06g07910D/BnaA06g14510D/BnaA06g14520D/BnaA06g20580D/BnaA06g38600D/BnaA07g08220D/BnaA07g11360D/BnaA07g…	87
ko04712	Circadian rhythm - plant	54/3079	146/33115	9.13749e-20	1.10665e-18	5.66418e-19	BnaA02g00920D/BnaA02g06500D/BnaA02g12130D/BnaA03g40160D/BnaA04g15260D/BnaA04g26750D/BnaA05g01090D/BnaA06g05470D/BnaA07g25310D/BnaA07g33120D/BnaA08g27870D/BnaA09g40710D/BnaA09g48410D/BnaA10g00780D/BnaA10g02550D/BnaA10g12930D/BnaA10g18430D/BnaA10g21200D/BnaA10g26930D/BnaAnng00500D/BnaAnng13370D/BnaAnng17890D/BnaC02g03470D/BnaC02g23820D/BnaC02g45250D/BnaC03g00040D/BnaC03g54820D/BnaC04g00640D/BnaC04g…	54
ko00620	Pyruvate metabolism	84/3079	344/33115	1.04191e-16	1.13568e-15	5.81277e-16	BnaA01g00210D/BnaA01g01360D/BnaA01g20680D/BnaA03g02560D/BnaA03g14380D/BnaA03g17570D/BnaA03g54330D/BnaA03g59170D/BnaA04g05070D/BnaA05g06620D/BnaA05g11390D/BnaA05g35800D/BnaA06g01320D/BnaA06g07900D/BnaA06g07910D/BnaA06g20580D/BnaA06g22820D/BnaA06g24600D/BnaA06g24610D/BnaA06g27940D/BnaA06g38600D/BnaA07g05850D/BnaA07g09080D/BnaA07g15940D/BnaA07g28560D/BnaA08g00900D/BnaA08g15200D/BnaA09g29700D/BnaA09g…	84
ko00280	Valine, leucine and isoleucine degradation	57/3079	185/33115	1.52178e-16	1.41726e-15	7.25397e-16	BnaA01g01360D/BnaA01g32560D/BnaA02g20250D/BnaA02g21490D/BnaA02g21580D/BnaA02g30470D/BnaA03g29700D/BnaA03g31030D/BnaA03g50820D/BnaA03g56490D/BnaA03g59170D/BnaA04g22010D/BnaA06g01320D/BnaA06g37960D/BnaA06g38800D/BnaA07g05850D/BnaA07g18710D/BnaA08g00900D/BnaA08g12350D/BnaA08g15200D/BnaA08g26000D/BnaA08g28650D/BnaA08g28670D/BnaA08g28680D/BnaA09g21330D/BnaA09g50980D/BnaAnng13240D/BnaAnng37920D/BnaC01g…	57
ko00040	Pentose and glucuronate interconversions	86/3079	359/33115	1.56029e-16	1.41726e-15	7.25397e-16	BnaA01g34430D/BnaA02g03420D/BnaA02g12200D/BnaA02g35210D/BnaA02g35220D/BnaA03g06500D/BnaA03g12920D/BnaA03g28980D/BnaA03g57500D/BnaA04g07000D/BnaA04g09140D/BnaA04g12070D/BnaA04g25450D/BnaA04g25460D/BnaA05g03600D/BnaA05g23750D/BnaA05g23760D/BnaA05g32480D/BnaA06g17680D/BnaA06g30860D/BnaA07g14670D/BnaA07g16000D/BnaA07g17330D/BnaA08g05020D/BnaA08g28340D/BnaA08g28360D/BnaA08g28370D/BnaA09g10900D/BnaA09g…	86
ko00910	Nitrogen metabolism	50/3079	149/33115	2.21913e-16	1.86066e-15	9.5234e-16	BnaA01g21620D/BnaA02g03140D/BnaA02g12430D/BnaA02g18610D/BnaA03g02040D/BnaA03g34780D/BnaA04g07450D/BnaA04g08160D/BnaA05g22420D/BnaA06g03770D/BnaA06g04100D/BnaA06g04110D/BnaA07g09830D/BnaA07g20840D/BnaA07g33680D/BnaA07g33690D/BnaA08g29950D/BnaA09g27570D/BnaA09g27970D/BnaA09g29930D/BnaA10g16660D/BnaA10g17910D/BnaA10g23880D/BnaAnng13720D/BnaAnng27730D/BnaC01g27750D/BnaC02g01610D/BnaC02g06690D/BnaC03g…	50
ko00410	beta-Alanine metabolism	48/3079	176/33115	5.37801e-12	4.18716e-11	2.14312e-11	BnaA01g01360D/BnaA02g21420D/BnaA02g21490D/BnaA03g04460D/BnaA03g50820D/BnaA03g59170D/BnaA04g05950D/BnaA06g01320D/BnaA06g24040D/BnaA06g29910D/BnaA07g05850D/BnaA07g18130D/BnaA07g18710D/BnaA08g00900D/BnaA08g12350D/BnaA08g15200D/BnaA08g28650D/BnaA08g28670D/BnaA08g28680D/BnaA09g07080D/BnaA09g32380D/BnaA10g28060D/BnaC01g02370D/BnaC02g28390D/BnaC02g28430D/BnaC03g06000D/BnaC03g49190D/BnaC03g61970D/BnaC03g…	48
ko00260	Glycine, serine and threonine metabolism	66/3079	295/33115	1.34182e-11	9.75058e-11	4.99064e-11	BnaA01g16120D/BnaA02g19770D/BnaA02g20250D/BnaA02g21420D/BnaA03g31030D/BnaA03g48400D/BnaA03g56490D/BnaA04g06460D/BnaA04g22010D/BnaA05g29640D/BnaA06g01320D/BnaA06g20780D/BnaA06g25700D/BnaA06g25710D/BnaA06g25900D/BnaA07g19850D/BnaA07g35670D/BnaA07g36280D/BnaA08g00900D/BnaA08g14930D/BnaA08g26140D/BnaA09g00950D/BnaA09g09000D/BnaA09g09210D/BnaA09g25320D/BnaA09g34470D/BnaA10g09090D/BnaAnng08840D/BnaAnng…	66
ko00250	Alanine, aspartate and glutamate metabolism	57/3079	238/33115	1.90608e-11	1.29852e-10	6.64619e-11	BnaA02g03140D/BnaA02g12430D/BnaA02g20250D/BnaA03g02040D/BnaA03g03400D/BnaA03g31030D/BnaA03g34780D/BnaA03g37150D/BnaA03g56490D/BnaA04g07450D/BnaA04g08160D/BnaA04g22010D/BnaA05g22420D/BnaA06g03770D/BnaA06g17510D/BnaA06g20540D/BnaA07g05940D/BnaA08g29950D/BnaA09g27570D/BnaA09g27970D/BnaA10g16660D/BnaA10g17910D/BnaA10g23880D/BnaAnng13240D/BnaAnng13720D/BnaAnng27730D/BnaAnng37920D/BnaC02g01610D/BnaC02g…	57
ko04136	Autophagy - other	41/3079	144/33115	4.24904e-11	2.72439e-10	1.39442e-10	BnaA01g17220D/BnaA03g21090D/BnaA03g40290D/BnaA03g42660D/BnaA03g59770D/BnaA04g01980D/BnaA04g26080D/BnaA05g03770D/BnaA05g16000D/BnaA05g22060D/BnaA06g15770D/BnaA06g21120D/BnaA06g37720D/BnaA07g17860D/BnaA07g17880D/BnaA07g28500D/BnaA07g38000D/BnaA09g37450D/BnaA09g42870D/BnaA09g42880D/BnaAnng27580D/BnaC01g19720D/BnaC03g25150D/BnaC03g52370D/BnaC04g03380D/BnaC04g19210D/BnaC04g23560D/BnaC04g50140D/BnaC05g…	41
ko00130	Ubiquinone and other terpenoid-quinone biosynthesis	46/3079	175/33115	5.82937e-11	3.53001e-10	1.80676e-10	BnaA01g01080D/BnaA01g13340D/BnaA02g07440D/BnaA02g09580D/BnaA02g26490D/BnaA03g11850D/BnaA03g46150D/BnaA03g46160D/BnaA04g05620D/BnaA04g08220D/BnaA04g13300D/BnaA05g12790D/BnaA06g06590D/BnaA08g15050D/BnaA08g30520D/BnaA09g29420D/BnaA09g43670D/BnaA09g46140D/BnaA09g49870D/BnaA10g04310D/BnaA10g08330D/BnaA10g28340D/BnaA10g28860D/BnaA10g29720D/BnaAnng18230D/BnaC01g02100D/BnaC01g15470D/BnaC02g10510D/BnaC02g…	46
ko00902	Monoterpenoid biosynthesis	13/3079	17/33115	6.3019e-11	3.6153e-10	1.85042e-10	BnaA03g22980D/BnaA03g24650D/BnaA06g33340D/BnaA06g33360D/BnaA09g13640D/BnaA09g13650D/BnaC03g27100D/BnaC07g22980D/BnaC07g23000D/BnaC08g34130D/BnaCnng38820D/BnaCnng52840D/BnaCnng60530D	13
ko00330	Arginine and proline metabolism	56/3079	245/33115	1.94946e-10	1.06246e-09	5.43797e-10	BnaA01g01360D/BnaA03g03400D/BnaA03g04460D/BnaA03g05080D/BnaA03g05780D/BnaA03g18760D/BnaA03g59170D/BnaA04g03460D/BnaA04g22810D/BnaA05g05760D/BnaA06g01320D/BnaA06g36140D/BnaA06g39660D/BnaA07g05850D/BnaA07g18130D/BnaA08g00900D/BnaA08g15200D/BnaA09g02760D/BnaA09g17880D/BnaA09g35230D/BnaA10g19050D/BnaAnng07910D/BnaAnng37880D/BnaC01g02370D/BnaC02g03850D/BnaC02g38230D/BnaC03g04830D/BnaC03g06000D/BnaC03g…	56
ko00220	Arginine biosynthesis	40/3079	149/33115	5.11937e-10	2.6572e-09	1.36003e-09	BnaA02g03140D/BnaA02g12430D/BnaA02g35990D/BnaA03g02040D/BnaA03g03400D/BnaA03g34780D/BnaA04g07450D/BnaA04g08160D/BnaA05g22420D/BnaA06g03770D/BnaA07g21750D/BnaA08g29950D/BnaA09g27570D/BnaA09g27970D/BnaA10g16660D/BnaA10g17910D/BnaA10g23880D/BnaAnng13720D/BnaAnng27730D/BnaC02g01610D/BnaC02g03850D/BnaC02g06690D/BnaC03g03050D/BnaC03g04830D/BnaC03g40250D/BnaC04g29670D/BnaC04g30250D/BnaC05g31580D/BnaC05g…	40
ko04146	Peroxisome	69/3079	346/33115	9.93253e-10	4.92112e-09	2.51878e-09	BnaA01g29420D/BnaA02g12320D/BnaA02g30470D/BnaA02g31160D/BnaA03g04970D/BnaA03g33370D/BnaA03g53180D/BnaA04g05950D/BnaA04g16310D/BnaA05g25060D/BnaA06g05150D/BnaA06g14510D/BnaA06g14520D/BnaA06g24040D/BnaA07g11360D/BnaA07g11370D/BnaA07g17800D/BnaA07g25510D/BnaA08g10870D/BnaA08g21730D/BnaA09g03730D/BnaA09g07080D/BnaA09g32380D/BnaA09g35800D/BnaA09g48720D/BnaA10g16720D/BnaA10g28060D/BnaAnng08060D/BnaAnng…	69
ko00561	Glycerolipid metabolism	56/3079	260/33115	2.03734e-09	9.6552e-09	4.94182e-09	BnaA01g01360D/BnaA01g05080D/BnaA02g02990D/BnaA02g19770D/BnaA03g01150D/BnaA03g02510D/BnaA03g51720D/BnaA03g59170D/BnaA04g00340D/BnaA04g12070D/BnaA04g23090D/BnaA06g01320D/BnaA07g05850D/BnaA07g17190D/BnaA07g19850D/BnaA07g35670D/BnaA08g00900D/BnaA08g07530D/BnaA08g15200D/BnaA09g08200D/BnaA09g40180D/BnaA09g43270D/BnaA10g18180D/BnaA10g26130D/BnaAnng00900D/BnaAnng06130D/BnaAnng06140D/BnaC01g02370D/BnaC01g…	56
ko00603	Glycosphingolipid biosynthesis - globo and isoglobo series	16/3079	34/33115	1.29318e-08	5.87317e-08	3.00607e-08	BnaA03g02510D/BnaA04g03760D/BnaA07g25350D/BnaA09g33690D/BnaA09g50290D/BnaAnng06130D/BnaAnng06140D/BnaC02g01150D/BnaC02g01160D/BnaC03g03520D/BnaC03g03530D/BnaC04g25580D/BnaC06g27130D/BnaC08g44330D/BnaCnng30620D/BnaCnng62740D	16
ko00471	D-Glutamine and D-glutamate metabolism	10/3079	15/33115	9.22063e-08	4.02019e-07	2.05766e-07	BnaA03g02040D/BnaA10g16660D/BnaA10g23880D/BnaAnng13720D/BnaC02g01610D/BnaC03g03050D/BnaC05g31580D/BnaC09g03800D/BnaC09g39680D/BnaC09g47860D	10
ko00020	Citrate cycle (TCA cycle)	51/3079	257/33115	1.68277e-07	7.0547e-07	3.61081e-07	BnaA01g00210D/BnaA02g12320D/BnaA03g04970D/BnaA03g54330D/BnaA05g03040D/BnaA05g03050D/BnaA05g03080D/BnaA06g07900D/BnaA06g07910D/BnaA06g20580D/BnaA06g24600D/BnaA06g24610D/BnaA06g25230D/BnaA06g38600D/BnaA07g08220D/BnaA07g09080D/BnaA07g17800D/BnaA07g25510D/BnaA07g28560D/BnaA08g26390D/BnaA08g26420D/BnaA09g29700D/BnaA09g51510D/BnaA10g00730D/BnaAnng05000D/BnaAnng08060D/BnaAnng25840D/BnaAnng25850D/BnaC01g…	51
ko00640	Propanoate metabolism	33/3079	135/33115	1.84732e-07	7.45771e-07	3.81708e-07	BnaA01g32560D/BnaA02g21490D/BnaA03g17570D/BnaA03g29700D/BnaA03g50820D/BnaA04g05950D/BnaA05g06620D/BnaA06g24040D/BnaA07g18710D/BnaA08g12350D/BnaA08g28650D/BnaA08g28670D/BnaA08g28680D/BnaA09g07080D/BnaA09g32380D/BnaA10g28060D/BnaC03g21010D/BnaC03g34940D/BnaC03g49190D/BnaC03g67370D/BnaC04g07230D/BnaC04g13910D/BnaC04g28570D/BnaC05g04350D/BnaC05g27860D/BnaC06g17810D/BnaC08g01840D/BnaC08g01850D/BnaC08g…	33
ko01007	Amino acid related enzymes	73/3079	445/33115	1.30997e-06	5.09954e-06	2.6101e-06	BnaA01g15380D/BnaA02g20250D/BnaA03g03400D/BnaA03g25380D/BnaA03g25410D/BnaA03g31030D/BnaA03g31900D/BnaA03g45240D/BnaA03g45250D/BnaA03g56490D/BnaA04g11450D/BnaA04g22010D/BnaA05g12790D/BnaA05g27370D/BnaA06g25700D/BnaA06g25710D/BnaA06g36140D/BnaA06g37960D/BnaA08g14930D/BnaA08g19390D/BnaA08g19400D/BnaA08g26000D/BnaA09g09210D/BnaA09g17880D/BnaA09g28460D/BnaA09g43670D/BnaA09g48390D/BnaA10g17760D/BnaA10g…	73
ko00604	Glycosphingolipid biosynthesis - ganglio series	8/3079	14/33115	9.94199e-06	3.73682e-05	1.91261e-05	BnaA04g03760D/BnaA07g25350D/BnaA09g33690D/BnaA09g50290D/BnaC04g25580D/BnaC06g27130D/BnaC08g44330D/BnaCnng30620D	8
ko00290	Valine, leucine and isoleucine biosynthesis	24/3079	103/33115	1.96862e-05	7.15265e-05	3.66094e-05	BnaA01g23200D/BnaA03g14730D/BnaA04g01910D/BnaA04g18470D/BnaA05g11160D/BnaA05g34460D/BnaA06g37960D/BnaA07g05810D/BnaA07g17940D/BnaA08g26000D/BnaA09g55140D/BnaA09g55150D/BnaC01g30200D/BnaC03g17780D/BnaC04g12850D/BnaC04g23500D/BnaC04g42560D/BnaC04g42590D/BnaC04g52970D/BnaC05g07810D/BnaC06g16700D/BnaC08g13970D/BnaC08g29320D/BnaC09g21470D	24
ko00531	Glycosaminoglycan degradation	10/3079	24/33115	2.74254e-05	9.64313e-05	4.93564e-05	BnaA02g01810D/BnaA04g03760D/BnaA07g25350D/BnaA09g33690D/BnaA09g50290D/BnaC02g04940D/BnaC04g25580D/BnaC06g27130D/BnaC08g44330D/BnaCnng30620D	10
ko00909	Sesquiterpenoid and triterpenoid biosynthesis	17/3079	68/33115	0.000122947	0.000418789	0.000214349	BnaA02g22750D/BnaA03g59500D/BnaA03g59510D/BnaA04g09360D/BnaA06g26510D/BnaAnng04260D/BnaAnng04280D/BnaAnng36420D/BnaC02g13490D/BnaC02g19300D/BnaC02g31080D/BnaC07g16660D/BnaC07g18170D/BnaC07g30440D/BnaCnng27320D/BnaCnng41750D/BnaCnng74840D	17
ko00270	Cysteine and methionine metabolism	64/3079	433/33115	0.000144933	0.000474972	0.000243105	BnaA01g12900D/BnaA01g15380D/BnaA02g20250D/BnaA03g03400D/BnaA03g05780D/BnaA03g31030D/BnaA03g45730D/BnaA03g56490D/BnaA03g58670D/BnaA04g01540D/BnaA04g22010D/BnaA05g12790D/BnaA05g13500D/BnaA05g16960D/BnaA06g00050D/BnaA06g07900D/BnaA06g07910D/BnaA06g20580D/BnaA06g25700D/BnaA06g25710D/BnaA06g37960D/BnaA06g38600D/BnaA08g00140D/BnaA08g14930D/BnaA08g26000D/BnaA09g09210D/BnaA09g25320D/BnaA09g43670D/BnaAnng…	64
ko00770	Pantothenate and CoA biosynthesis	24/3079	116/33115	0.000148157	0.000474972	0.000243105	BnaA01g23200D/BnaA03g14730D/BnaA04g01910D/BnaA04g18470D/BnaA05g11160D/BnaA06g29910D/BnaA06g37960D/BnaA07g05810D/BnaA07g17940D/BnaA08g26000D/BnaA09g55140D/BnaA09g55150D/BnaC01g30200D/BnaC03g17780D/BnaC04g12850D/BnaC04g23500D/BnaC04g42560D/BnaC04g42590D/BnaC05g07810D/BnaC06g16700D/BnaC07g26790D/BnaC08g13970D/BnaC08g29320D/BnaC09g21470D	24
ko00053	Ascorbate and aldarate metabolism	30/3079	163/33115	0.000221974	0.000691291	0.000353823	BnaA01g01360D/BnaA01g05350D/BnaA03g59170D/BnaA04g09140D/BnaA06g01320D/BnaA06g30860D/BnaA07g00980D/BnaA07g05850D/BnaA07g14670D/BnaA08g00900D/BnaA08g15200D/BnaA08g16710D/BnaA09g10050D/BnaA09g11300D/BnaA09g40940D/BnaC01g00210D/BnaC01g02370D/BnaC03g60380D/BnaC03g61970D/BnaC03g78230D/BnaC04g20560D/BnaC05g26280D/BnaC06g06890D/BnaC06g12620D/BnaC07g01430D/BnaC07g46060D/BnaC08g33440D/BnaC09g10140D/BnaC09g…	30
ko99974	Translation	12/3079	42/33115	0.00031734	0.000960836	0.000491785	BnaA01g15060D/BnaA03g35650D/BnaA03g47670D/BnaA05g18810D/BnaA05g18830D/BnaC01g17790D/BnaC01g32670D/BnaC01g32710D/BnaC03g41490D/BnaC05g31840D/BnaC05g51720D/BnaC07g39950D	12
ko00903	Limonene and pinene degradation	9/3079	28/33115	0.000687954	0.00202668	0.00103731	BnaA01g01360D/BnaA03g59170D/BnaA07g05850D/BnaA08g15200D/BnaC01g02370D/BnaC03g61970D/BnaC05g26280D/BnaC07g46060D/BnaC09g47240D	9
ko00340	Histidine metabolism	17/3079	83/33115	0.00145808	0.00418239	0.00214067	BnaA01g01360D/BnaA01g05350D/BnaA03g59170D/BnaA06g01320D/BnaA07g05850D/BnaA08g00900D/BnaA08g15200D/BnaA08g16710D/BnaC01g00210D/BnaC01g02370D/BnaC03g60380D/BnaC03g61970D/BnaC03g78230D/BnaC05g26280D/BnaC06g06890D/BnaC07g46060D/BnaC09g47240D	17
ko00592	alpha-Linolenic acid metabolism	27/3079	160/33115	0.00173168	0.00483981	0.00247716	BnaA02g30470D/BnaA03g01150D/BnaA04g05950D/BnaA05g32650D/BnaA05g32660D/BnaA06g24040D/BnaA07g17190D/BnaA09g07080D/BnaA09g32380D/BnaA10g26130D/BnaA10g28060D/BnaAnng00900D/BnaC02g02780D/BnaC02g38800D/BnaC03g01520D/BnaC03g01530D/BnaC03g49190D/BnaC04g28570D/BnaC05g04350D/BnaC05g27860D/BnaC05g47740D/BnaC05g47750D/BnaC08g23150D/BnaC09g06780D/BnaC09g53220D/BnaCnng07580D/BnaCnng10420D	27
ko00230	Purine metabolism	49/3079	348/33115	0.00229375	0.00625046	0.00319917	BnaA01g20680D/BnaA03g02560D/BnaA03g44400D/BnaA03g45390D/BnaA03g55140D/BnaA04g05070D/BnaA04g25770D/BnaA05g08630D/BnaA05g35800D/BnaA05g37430D/BnaA06g22820D/BnaA07g15940D/BnaA08g20600D/BnaA09g20120D/BnaA09g24370D/BnaA09g30060D/BnaA09g33340D/BnaA09g52300D/BnaA09g52310D/BnaA10g07730D/BnaA10g22870D/BnaAnng32070D/BnaC01g25930D/BnaC02g42660D/BnaC03g03680D/BnaC03g50680D/BnaC03g65030D/BnaC04g09710D/BnaC04g…	49
ko00600	Sphingolipid metabolism	16/3079	82/33115	0.00332348	0.0088356	0.00452233	BnaA03g02510D/BnaA05g31220D/BnaA08g18660D/BnaA10g15860D/BnaAnng06130D/BnaAnng06140D/BnaC02g01150D/BnaC02g01160D/BnaC03g03520D/BnaC03g03530D/BnaC03g58220D/BnaC05g45760D/BnaC09g54290D/BnaCnng16270D/BnaCnng16290D/BnaCnng62740D	16
ko00310	Lysine degradation	23/3079	139/33115	0.0046704	0.0121208	0.00620379	BnaA01g01360D/BnaA01g03680D/BnaA03g52370D/BnaA03g52380D/BnaA03g59170D/BnaA06g01320D/BnaA06g07970D/BnaA07g05850D/BnaA07g09660D/BnaA08g00900D/BnaA08g15200D/BnaA09g38110D/BnaC01g02370D/BnaC01g05030D/BnaC03g61970D/BnaC03g78230D/BnaC05g26280D/BnaC06g06890D/BnaC06g20200D/BnaC07g44110D/BnaC07g44120D/BnaC07g46060D/BnaC09g47240D	23
ko00970	Aminoacyl-tRNA biosynthesis	38/3079	267/33115	0.00554743	0.0137675	0.00704663	BnaA03g25380D/BnaA03g25410D/BnaA03g31900D/BnaA03g45240D/BnaA03g45250D/BnaA04g11450D/BnaA05g27370D/BnaA07g25900D/BnaA08g19390D/BnaA08g19400D/BnaA09g28460D/BnaA09g48390D/BnaA10g17760D/BnaA10g30390D/BnaAnng09520D/BnaAnng09530D/BnaC03g29830D/BnaC03g40690D/BnaC03g64100D/BnaC03g73420D/BnaC04g01750D/BnaC05g20730D/BnaC05g41490D/BnaC06g27510D/BnaC06g41300D/BnaC07g10830D/BnaC07g19770D/BnaC07g37200D/BnaC07g…	38
ko00480	Glutathione metabolism	48/3079	355/33115	0.00555753	0.0137675	0.00704663	BnaA01g12900D/BnaA02g12320D/BnaA02g35770D/BnaA03g04190D/BnaA03g04970D/BnaA03g14580D/BnaA03g45730D/BnaA03g58670D/BnaA04g28590D/BnaA05g11240D/BnaA06g32220D/BnaA07g15160D/BnaA07g17800D/BnaA07g20590D/BnaA07g24020D/BnaA07g25510D/BnaA07g28470D/BnaA08g30000D/BnaA09g01980D/BnaA10g20180D/BnaAnng08060D/BnaAnng25840D/BnaAnng25850D/BnaC01g39170D/BnaC01g41470D/BnaC02g24620D/BnaC03g05780D/BnaC03g06570D/BnaC03g…	48
ko00071	Fatty acid degradation	27/3079	176/33115	0.00666002	0.0160571	0.00821852	BnaA01g01360D/BnaA02g30470D/BnaA03g59170D/BnaA04g05950D/BnaA06g01320D/BnaA06g24040D/BnaA07g05850D/BnaA08g00900D/BnaA08g15200D/BnaA09g07080D/BnaA09g32380D/BnaA10g28060D/BnaC01g02370D/BnaC02g38800D/BnaC03g49190D/BnaC03g61970D/BnaC03g78230D/BnaC04g28570D/BnaC05g04350D/BnaC05g26280D/BnaC05g27860D/BnaC06g06890D/BnaC07g46060D/BnaC08g23150D/BnaC09g06780D/BnaC09g47240D/BnaC09g53220D	27
ko00400	Phenylalanine, tyrosine and tryptophan biosynthesis	29/3079	193/33115	0.0067764	0.0160571	0.00821852	BnaA01g16120D/BnaA03g03400D/BnaA03g29410D/BnaA03g48400D/BnaA05g04750D/BnaA05g12790D/BnaA05g30990D/BnaA09g00950D/BnaA09g08060D/BnaA09g34470D/BnaA09g43670D/BnaA10g09090D/BnaAnng03180D/BnaC02g03850D/BnaC03g04830D/BnaC03g34680D/BnaC04g52200D/BnaC05g21760D/BnaC05g45470D/BnaC06g11940D/BnaC07g02570D/BnaC07g40410D/BnaC08g25400D/BnaC08g36300D/BnaC09g00060D/BnaC09g08240D/BnaC09g31260D/BnaCnng28880D/BnaCnng…	29
ko00380	Tryptophan metabolism	31/3079	213/33115	0.00833011	0.0193188	0.00988793	BnaA01g01360D/BnaA03g53180D/BnaA03g59170D/BnaA06g01320D/BnaA06g14510D/BnaA06g14520D/BnaA07g05850D/BnaA07g11360D/BnaA07g11370D/BnaA08g00900D/BnaA08g10870D/BnaA08g15200D/BnaA08g21730D/BnaAnng11640D/BnaC01g02370D/BnaC01g03420D/BnaC03g61970D/BnaC03g65530D/BnaC03g78230D/BnaC04g21590D/BnaC05g15970D/BnaC05g15990D/BnaC05g26280D/BnaC06g06890D/BnaC07g15160D/BnaC07g15270D/BnaC07g15280D/BnaC07g45360D/BnaC07g…	31
ko03051	Proteasome	52/3079	406/33115	0.0114452	0.0259902	0.0133026	BnaA01g30490D/BnaA02g08820D/BnaA02g35440D/BnaA03g10790D/BnaA03g11100D/BnaA03g11110D/BnaA03g11140D/BnaA03g11150D/BnaA03g32320D/BnaA03g39320D/BnaA03g59360D/BnaA06g03820D/BnaA09g05850D/BnaA09g05860D/BnaA09g29090D/BnaA09g29100D/BnaA10g27060D/BnaA10g27070D/BnaA10g27080D/BnaA10g28400D/BnaA10g28410D/BnaAnng12060D/BnaAnng12070D/BnaC01g07880D/BnaC01g27600D/BnaC01g38510D/BnaC02g12680D/BnaC02g12690D/BnaC02g…	52
ko01040	Biosynthesis of unsaturated fatty acids	14/3079	78/33115	0.0121776	0.0270889	0.0138649	BnaA02g30470D/BnaA04g05950D/BnaA06g24040D/BnaA09g07080D/BnaA09g32380D/BnaA10g28060D/BnaC02g38800D/BnaC03g49190D/BnaC04g28570D/BnaC05g04350D/BnaC05g27860D/BnaC08g23150D/BnaC09g06780D/BnaC09g53220D	14
ko00660	C5-Branched dibasic acid metabolism	9/3079	42/33115	0.0135742	0.0295917	0.0151459	BnaA03g14730D/BnaA04g18470D/BnaA05g11160D/BnaA05g34460D/BnaC03g17780D/BnaC04g12850D/BnaC04g42560D/BnaC04g42590D/BnaC04g52970D	9
ko00565	Ether lipid metabolism	16/3079	95/33115	0.0139995	0.0299204	0.0153142	BnaA03g01150D/BnaA07g17190D/BnaA08g04540D/BnaA10g26130D/BnaAnng00900D/BnaAnng08250D/BnaC02g02780D/BnaC03g01520D/BnaC03g01530D/BnaC03g62540D/BnaC07g45790D/BnaC08g05680D/BnaC08g46860D/BnaCnng07580D/BnaCnng10420D/BnaCnng54530D	16
ko00901	Indole alkaloid biosynthesis	4/3079	11/33115	0.0144241	0.0302352	0.0154753	BnaA02g16660D/BnaA07g31170D/BnaC02g22570D/BnaC06g34860D	4
ko00591	Linoleic acid metabolism	9/3079	44/33115	0.0182549	0.037543	0.0192156	BnaA03g01150D/BnaA07g17190D/BnaA10g26130D/BnaAnng00900D/BnaC02g02780D/BnaC03g01520D/BnaC03g01530D/BnaCnng07580D/BnaCnng10420D	9
ko00072	Synthesis and degradation of ketone bodies	5/3079	18/33115	0.0211858	0.0427639	0.0218878	BnaA02g21580D/BnaA09g21330D/BnaC09g23740D/BnaCnng23810D/BnaCnng45000D	5
ko00590	Arachidonic acid metabolism	13/3079	76/33115	0.0223452	0.0442842	0.022666	BnaA03g01150D/BnaA03g14580D/BnaA05g11240D/BnaA07g17190D/BnaA10g26130D/BnaAnng00900D/BnaC02g02780D/BnaC03g01520D/BnaC03g01530D/BnaC03g17600D/BnaCnng07580D/BnaCnng10420D/BnaCnng27540D	13
ko00100	Steroid biosynthesis	20/3079	135/33115	0.024942	0.0485479	0.0248483	BnaA01g25880D/BnaA03g01150D/BnaA05g19350D/BnaA06g02910D/BnaA07g17190D/BnaA07g32310D/BnaA10g26130D/BnaAnng00900D/BnaC01g33070D/BnaC02g02780D/BnaC03g01520D/BnaC03g01530D/BnaC05g32840D/BnaC06g03410D/BnaC06g03450D/BnaC06g03470D/BnaC06g36760D/BnaCnng07580D/BnaCnng10420D/BnaCnng28360D	20

## Sheet: Table S7
Table S7. Expression profiles of BnTPS genes in different tissues.
Gene ID	Bud	Callus	Leaf	Root	Silique
BnTPS1	5.07246	5.20735	1.50344	22.7255	6.04514
BnTPS2	7.20253	14.3305	0.436996	41.5074	7.74153
BnTPS3	0.0102632	0	0	0.0138625	0.540379
BnTPS4	10.2608	14.9347	5.3479	3.85349	17.2883
BnTPS5	0.0510552	0	0.00989798	0.0340124	3.4531
BnTPS6	5.52683	10.449	1.14166	6.45066	5.71168
BnTPS7	0	0	0	0	0.070085
BnTPS8	0.562958	0.0130364	0.0211776	1.54036	1.84188
BnTPS9	7.2208	16.4151	1.78701	4.66987	2.74497
BnTPS10	3.97391	1.03159	12.0301	4.25441	14.2975
BnTPS11	0.722437	4.57644	0.338929	22.7106	3.55503
BnTPS12	11.9492	12.5023	13.755	11.2704	11.8499
BnTPS13	24.3882	38.7318	1.31894	81.7354	5.77552
BnTPS14	3.00505	4.73154	0.272622	8.38396	3.28882
BnTPS15	9.54528	15.4153	0.304128	47.9553	5.43105
BnTPS16	0.429826	0.005411	0.457106	0.00557877	0.271354
BnTPS17	0.00993345	0	0	0	0.052761
BnTPS18	0.176742	0	0.0027415	0.951249	0.671492
BnTPS19	10.6762	20.4329	3.43794	7.8261	6.71801
BnTPS20	3.34151	0.969074	8.55486	2.74623	10.4825
BnTPS21	5.63258	12.3635	1.48874	2.61597	11.3984
BnTPS22	0.113711	0.046723	0	0.109222	1.91174
BnTPS23	16.2075	19.4247	21.8332	17.1038	15.0303
BnTPS24	8.70314	22.1945	0.468911	117.562	5.31463
BnTPS25	27.4708	51.3713	2.22298	100.138	8.23256
BnTPS26	4.60801	8.60705	0.700695	9.76112	4.3683

## Sheet: Table S8
Table S8. Expression profiles of BnTPS genes under different abiotic stress conditions.
Gene ID	Control	1h_de	8h_de	4h_cold	24h_cold	4h_ABA	24h_ABA	4h_Nacl	24h_Nacl
BnTPS1	3.31118	6.58246	16.2602	3.71618	6.1466	6.23989	9.03827	15.3102	6.27218
BnTPS2	3.63767	15.146	24.9631	1.60977	1.13128	15.9864	3.20971	35.6563	8.52836
BnTPS3	0	0.00567367	0	0	0.00746667	0	0	0	0.0183187
BnTPS4	6.68688	3.90799	0.842246	1.98567	7.16961	2.79622	8.81418	1.3169	5.43642
BnTPS5	0.008504	0.0845653	0.0403217	0	0.125558	0	0	0	0
BnTPS6	1.91657	2.15333	6.2074	1.71628	2.8112	2.11978	4.27001	4.48093	3.42823
BnTPS7	0	0	0	0	0	0	0	0	0
BnTPS8	0.040577	0.114697	0.101356	0.221318	0.0310873	0.0342417	0.0138837	0.0445963	0.0449763
BnTPS9	3.18294	13.6592	38.1123	3.68966	2.58327	8.47167	7.40286	14.1648	9.64012
BnTPS10	7.88062	3.65309	2.0944	8.74358	5.10615	6.41721	8.55139	3.53397	7.77688
BnTPS11	1.16858	43.9479	43.11	6.21678	3.86504	6.20134	3.12832	43.8445	6.78088
BnTPS12	10.257	8.64743	10.4998	11.3847	18.2982	6.8143	13.6334	9.05842	7.73883
BnTPS13	2.10299	38.8023	39.5691	4.28645	4.6138	5.44168	2.6643	35.6372	4.56098
BnTPS14	1.05461	3.81204	20.3695	1.48025	1.86189	2.59772	2.85689	9.04645	2.2912
BnTPS15	3.30363	15.3354	25.7905	2.23667	1.38847	12.923	3.07095	29.9054	7.37182
BnTPS16	0.367642	0.191293	0.0730727	0.303566	0.0450197	0.23068	0.173597	0.199419	0.0892927
BnTPS17	0	0	0	0	0	0	0	0	0
BnTPS18	0	0.0364027	0.145755	0.0463043	0.0414417	0	0.00757833	0.013117	0
BnTPS19	4.91168	21.1337	54.2755	4.21889	6.48926	14.5267	17.5244	23.8462	15.3
BnTPS20	6.79277	2.71216	1.05614	5.90453	3.11404	3.96536	4.10223	2.05395	4.08817
BnTPS21	3.50018	1.15253	0.563411	0.69981	5.40104	2.73284	13.8561	1.36414	6.11229
BnTPS22	0	0.0603027	0.0591823	0	0.0388893	0.00839333	0	0	0
BnTPS23	13.7896	12.4707	14.9644	14.6741	26.0241	9.72309	16.6698	11.683	9.65966
BnTPS24	2.2799	76.5987	86.5953	10.1752	5.71015	11.5345	5.26818	91.9584	10.9229
BnTPS25	2.92252	47.9835	38.8846	5.4664	5.95933	7.38833	2.98944	47.9643	5.05585
BnTPS26	1.69383	5.66112	15.6528	1.504	6.45963	2.76235	4.37452	11.2792	3.66319

## Sheet: Table S9
Table S9. SNPs of the TPS genes identified in 324 B. napus accessions.
Chr	Start	End	length	Gene ID	SNP number	Subgroup	SNP location	Flowering time (PFT)	Full flowering time (FFT1)	Final flowering time (FFT2)	Early flowering stage (EFS)	Late-flowering stage (LFS)	Flowering period (FP)	Plant height (PH)	Thousand seed weight(TSW)	Glucosinolate(GLU)	Erucic acid
chrA01	14567128	14570992		BnTPS1	38	group II	14568280;14570673			Significant
chrA02	8464985	8468785		BnTPS2	62	group II
chrA02	11694151	11698160		BnTPS3	17	group I
chrA03	21753651	21757564		BnTPS4	28	group II
chrA03	24948910	24953024		BnTPS5	40	group I
chrA03	29288413	29292101		BnTPS6	51	group II	29288856;29289074;29289123;29289302;29289317;29289330;29289341;29289408;29289467;29289476;29289734;29289741;29289746;29289770;29289800;29289857;29289867;29289959;29290118;29290121;29290387;29290407;29290549;29290565;29290582;29290598;29290649;29290679;29290721;29290727;29290736;29290860;29290946;29290979;29290999;29291022;29291024;29291036;29291099;29291199;29291400;29291406;29291494;29291521;292…								Significant
chrA06	5956864	5962255		BnTPS7	43	group I
chrA06	5965389	5969386		BnTPS8	58	group I
chrA07	18537426	18540340		BnTPS9	38	group II
chrA07	23336022	23343787		BnTPS10	20	group I
chrA08	15349348	15352504		BnTPS11	73	group II	15350558;15350618;15351698;15352082									Significant
chrA08	18761317	18764792		BnTPS12	40	group II
chrA09	4910517	4913499		BnTPS13	22	group II	4911072;4911225;4911231;4911516									Significant	Significant
chrC01_random	2508336	2512178		BnTPS14	5	group II
chrC02	16112222	16116156		BnTPS15	12	group II
chrC02	22383968	22388832		BnTPS16	3	group I	22385050;22386719;22388514	Significant	Significant			Significant	Significant	Significant
chrC05	7581899	7585950		BnTPS17	3	group I
chrC05	7592336	7596264		BnTPS18	1	group I
chrC06	27859295	27862508		BnTPS19	10	group II
chrC06	36340279	36348607		BnTPS20	0	group I
chrC07	37350798	37354727		BnTPS21	38	group II
chrC07_random	2538936	2542875		BnTPS22	22	group I
chrC08	1334207	1337728		BnTPS23	3	group II	1335026;1335380	Significant	Significant	Significant
chrC08	8967726	8971384		BnTPS24	0	group II
chrC09_random	161809	164788		BnTPS25	19	group II	163094;163184;163202;163232;163244;163276;163277;164189;164192;164396;164405;164408;164420									Significant	Significant
chrCnn_random	39997316	40000066		BnTPS26	9	group II	39997710;39999045			Significant

## Sheet: Table S10
Table S10. SNP annotation.	Table S10. SNP annotation.
Chromosome	Position	ID	REF	ALT	Annotation
chrA01	14567355	chrA01-14567355	A	G	ANN=G|synonymous_variant|LOW|Gene_BnaA01g22200D|Gene_BnaA01g22200D|transcript|BnaA01g22200D|Coding|3/3|c.2559T>C|p.Phe853Phe|2559/2574|2559/2574|853/857||
chrA01	14567676	chrA01-14567676	A	C	ANN=C|intron_variant|MODIFIER|Gene_BnaA01g22200D|Gene_BnaA01g22200D|transcript|BnaA01g22200D|Coding|2/2|c.2257-19T>G||||||
chrA01	14568280	chrA01-14568280	C	A	ANN=A|synonymous_variant|LOW|Gene_BnaA01g22200D|Gene_BnaA01g22200D|transcript|BnaA01g22200D|Coding|1/3|c.1836G>T|p.Ala612Ala|1836/2574|1836/2574|612/857||
chrA01	14568302	chrA01-14568302	G	A	ANN=A|missense_variant|MODERATE|Gene_BnaA01g22200D|Gene_BnaA01g22200D|transcript|BnaA01g22200D|Coding|1/3|c.1814C>T|p.Ser605Leu|1814/2574|1814/2574|605/857||
chrA01	14568304	chrA01-14568304	G	A	ANN=A|synonymous_variant|LOW|Gene_BnaA01g22200D|Gene_BnaA01g22200D|transcript|BnaA01g22200D|Coding|1/3|c.1812C>T|p.Thr604Thr|1812/2574|1812/2574|604/857||
chrA01	14568373	chrA01-14568373	G	A	ANN=A|synonymous_variant|LOW|Gene_BnaA01g22200D|Gene_BnaA01g22200D|transcript|BnaA01g22200D|Coding|1/3|c.1743C>T|p.Val581Val|1743/2574|1743/2574|581/857||
chrA01	14568553	chrA01-14568553	C	T	ANN=T|synonymous_variant|LOW|Gene_BnaA01g22200D|Gene_BnaA01g22200D|transcript|BnaA01g22200D|Coding|1/3|c.1563G>A|p.Lys521Lys|1563/2574|1563/2574|521/857||
chrA01	14568688	chrA01-14568688	G	C	ANN=C|synonymous_variant|LOW|Gene_BnaA01g22200D|Gene_BnaA01g22200D|transcript|BnaA01g22200D|Coding|1/3|c.1428C>G|p.Leu476Leu|1428/2574|1428/2574|476/857||
chrA01	14568841	chrA01-14568841	A	G	ANN=G|synonymous_variant|LOW|Gene_BnaA01g22200D|Gene_BnaA01g22200D|transcript|BnaA01g22200D|Coding|1/3|c.1275T>C|p.Tyr425Tyr|1275/2574|1275/2574|425/857||
chrA01	14568933	chrA01-14568933	T	C	ANN=C|missense_variant|MODERATE|Gene_BnaA01g22200D|Gene_BnaA01g22200D|transcript|BnaA01g22200D|Coding|1/3|c.1183A>G|p.Asn395Asp|1183/2574|1183/2574|395/857||
chrA01	14569174	chrA01-14569174	T	A	ANN=A|synonymous_variant|LOW|Gene_BnaA01g22200D|Gene_BnaA01g22200D|transcript|BnaA01g22200D|Coding|1/3|c.942A>T|p.Leu314Leu|942/2574|942/2574|314/857||
chrA01	14569248	chrA01-14569248	A	G	ANN=G|synonymous_variant|LOW|Gene_BnaA01g22200D|Gene_BnaA01g22200D|transcript|BnaA01g22200D|Coding|1/3|c.868T>C|p.Leu290Leu|868/2574|868/2574|290/857||
chrA01	14569291	chrA01-14569291	C	T	ANN=T|synonymous_variant|LOW|Gene_BnaA01g22200D|Gene_BnaA01g22200D|transcript|BnaA01g22200D|Coding|1/3|c.825G>A|p.Gly275Gly|825/2574|825/2574|275/857||
chrA01	14569357	chrA01-14569357	G	A	ANN=A|synonymous_variant|LOW|Gene_BnaA01g22200D|Gene_BnaA01g22200D|transcript|BnaA01g22200D|Coding|1/3|c.759C>T|p.Asp253Asp|759/2574|759/2574|253/857||
chrA01	14569492	chrA01-14569492	A	G	ANN=G|synonymous_variant|LOW|Gene_BnaA01g22200D|Gene_BnaA01g22200D|transcript|BnaA01g22200D|Coding|1/3|c.624T>C|p.Leu208Leu|624/2574|624/2574|208/857||
chrA01	14569519	chrA01-14569519	A	G	ANN=G|synonymous_variant|LOW|Gene_BnaA01g22200D|Gene_BnaA01g22200D|transcript|BnaA01g22200D|Coding|1/3|c.597T>C|p.Ile199Ile|597/2574|597/2574|199/857||
chrA01	14569585	chrA01-14569585	G	A	ANN=A|synonymous_variant|LOW|Gene_BnaA01g22200D|Gene_BnaA01g22200D|transcript|BnaA01g22200D|Coding|1/3|c.531C>T|p.Tyr177Tyr|531/2574|531/2574|177/857||
chrA01	14569678	chrA01-14569678	G	A	ANN=A|synonymous_variant|LOW|Gene_BnaA01g22200D|Gene_BnaA01g22200D|transcript|BnaA01g22200D|Coding|1/3|c.438C>T|p.Phe146Phe|438/2574|438/2574|146/857||
chrA01	14569812	chrA01-14569812	C	T	ANN=T|missense_variant|MODERATE|Gene_BnaA01g22200D|Gene_BnaA01g22200D|transcript|BnaA01g22200D|Coding|1/3|c.304G>A|p.Val102Ile|304/2574|304/2574|102/857||
chrA01	14569885	chrA01-14569885	C	G	ANN=G|missense_variant|MODERATE|Gene_BnaA01g22200D|Gene_BnaA01g22200D|transcript|BnaA01g22200D|Coding|1/3|c.231G>C|p.Gln77His|231/2574|231/2574|77/857||
chrA01	14570032	chrA01-14570032	A	G	ANN=G|synonymous_variant|LOW|Gene_BnaA01g22200D|Gene_BnaA01g22200D|transcript|BnaA01g22200D|Coding|1/3|c.84T>C|p.Pro28Pro|84/2574|84/2574|28/857||
chrA01	14570040	chrA01-14570040	A	C	ANN=C|missense_variant|MODERATE|Gene_BnaA01g22200D|Gene_BnaA01g22200D|transcript|BnaA01g22200D|Coding|1/3|c.76T>G|p.Ser26Ala|76/2574|76/2574|26/857||
chrA01	14570101	chrA01-14570101	T	C	ANN=C|synonymous_variant|LOW|Gene_BnaA01g22200D|Gene_BnaA01g22200D|transcript|BnaA01g22200D|Coding|1/3|c.15A>G|p.Ser5Ser|15/2574|15/2574|5/857||
chrA01	14570332	chrA01-14570332	C	T	ANN=T|upstream_gene_variant|MODIFIER|Gene_BnaA01g22200D|Gene_BnaA01g22200D|transcript|BnaA01g22200D|Coding||c.-217G>A|||||217|,T|intergenic_region|MODIFIER|Gene_BnaA01g22200D-Gene_BnaA01g22210D|Gene_BnaA01g22200D-Gene_BnaA01g22210D|intergenic_region|Gene_BnaA01g22200D-Gene_BnaA01g22210D|||n.14570332C>T||||||
chrA01	14570341	chrA01-14570341	G	A	ANN=A|upstream_gene_variant|MODIFIER|Gene_BnaA01g22200D|Gene_BnaA01g22200D|transcript|BnaA01g22200D|Coding||c.-226C>T|||||226|,A|intergenic_region|MODIFIER|Gene_BnaA01g22200D-Gene_BnaA01g22210D|Gene_BnaA01g22200D-Gene_BnaA01g22210D|intergenic_region|Gene_BnaA01g22200D-Gene_BnaA01g22210D|||n.14570341G>A||||||
chrA01	14570417	chrA01-14570417	A	G	ANN=G|upstream_gene_variant|MODIFIER|Gene_BnaA01g22200D|Gene_BnaA01g22200D|transcript|BnaA01g22200D|Coding||c.-302T>C|||||302|,G|intergenic_region|MODIFIER|Gene_BnaA01g22200D-Gene_BnaA01g22210D|Gene_BnaA01g22200D-Gene_BnaA01g22210D|intergenic_region|Gene_BnaA01g22200D-Gene_BnaA01g22210D|||n.14570417A>G||||||
chrA01	14570450	chrA01-14570450	A	T	ANN=T|upstream_gene_variant|MODIFIER|Gene_BnaA01g22200D|Gene_BnaA01g22200D|transcript|BnaA01g22200D|Coding||c.-335T>A|||||335|,T|intergenic_region|MODIFIER|Gene_BnaA01g22200D-Gene_BnaA01g22210D|Gene_BnaA01g22200D-Gene_BnaA01g22210D|intergenic_region|Gene_BnaA01g22200D-Gene_BnaA01g22210D|||n.14570450A>T||||||
chrA01	14570468	chrA01-14570468	G	A	ANN=A|upstream_gene_variant|MODIFIER|Gene_BnaA01g22200D|Gene_BnaA01g22200D|transcript|BnaA01g22200D|Coding||c.-353C>T|||||353|,A|intergenic_region|MODIFIER|Gene_BnaA01g22200D-Gene_BnaA01g22210D|Gene_BnaA01g22200D-Gene_BnaA01g22210D|intergenic_region|Gene_BnaA01g22200D-Gene_BnaA01g22210D|||n.14570468G>A||||||
chrA01	14570666	chrA01-14570666	C	T	ANN=T|upstream_gene_variant|MODIFIER|Gene_BnaA01g22200D|Gene_BnaA01g22200D|transcript|BnaA01g22200D|Coding||c.-551G>A|||||551|,T|intergenic_region|MODIFIER|Gene_BnaA01g22200D-Gene_BnaA01g22210D|Gene_BnaA01g22200D-Gene_BnaA01g22210D|intergenic_region|Gene_BnaA01g22200D-Gene_BnaA01g22210D|||n.14570666C>T||||||
chrA01	14570673	chrA01-14570673	C	A	ANN=A|upstream_gene_variant|MODIFIER|Gene_BnaA01g22200D|Gene_BnaA01g22200D|transcript|BnaA01g22200D|Coding||c.-558G>T|||||558|,A|intergenic_region|MODIFIER|Gene_BnaA01g22200D-Gene_BnaA01g22210D|Gene_BnaA01g22200D-Gene_BnaA01g22210D|intergenic_region|Gene_BnaA01g22200D-Gene_BnaA01g22210D|||n.14570673C>A||||||
chrA01	14570684	chrA01-14570684	T	C	ANN=C|upstream_gene_variant|MODIFIER|Gene_BnaA01g22200D|Gene_BnaA01g22200D|transcript|BnaA01g22200D|Coding||c.-569A>G|||||569|,C|intergenic_region|MODIFIER|Gene_BnaA01g22200D-Gene_BnaA01g22210D|Gene_BnaA01g22200D-Gene_BnaA01g22210D|intergenic_region|Gene_BnaA01g22200D-Gene_BnaA01g22210D|||n.14570684T>C||||||
chrA01	14570752	chrA01-14570752	C	A	ANN=A|upstream_gene_variant|MODIFIER|Gene_BnaA01g22200D|Gene_BnaA01g22200D|transcript|BnaA01g22200D|Coding||c.-637G>T|||||637|,A|intergenic_region|MODIFIER|Gene_BnaA01g22200D-Gene_BnaA01g22210D|Gene_BnaA01g22200D-Gene_BnaA01g22210D|intergenic_region|Gene_BnaA01g22200D-Gene_BnaA01g22210D|||n.14570752C>A||||||
chrA01	14570796	chrA01-14570796	G	A	ANN=A|upstream_gene_variant|MODIFIER|Gene_BnaA01g22200D|Gene_BnaA01g22200D|transcript|BnaA01g22200D|Coding||c.-681C>T|||||681|,A|intergenic_region|MODIFIER|Gene_BnaA01g22200D-Gene_BnaA01g22210D|Gene_BnaA01g22200D-Gene_BnaA01g22210D|intergenic_region|Gene_BnaA01g22200D-Gene_BnaA01g22210D|||n.14570796G>A||||||
chrA01	14570860	chrA01-14570860	A	G	ANN=G|upstream_gene_variant|MODIFIER|Gene_BnaA01g22200D|Gene_BnaA01g22200D|transcript|BnaA01g22200D|Coding||c.-745T>C|||||745|,G|intergenic_region|MODIFIER|Gene_BnaA01g22200D-Gene_BnaA01g22210D|Gene_BnaA01g22200D-Gene_BnaA01g22210D|intergenic_region|Gene_BnaA01g22200D-Gene_BnaA01g22210D|||n.14570860A>G||||||
chrA01	14570862	chrA01-14570862	A	G	ANN=G|upstream_gene_variant|MODIFIER|Gene_BnaA01g22200D|Gene_BnaA01g22200D|transcript|BnaA01g22200D|Coding||c.-747T>C|||||747|,G|intergenic_region|MODIFIER|Gene_BnaA01g22200D-Gene_BnaA01g22210D|Gene_BnaA01g22200D-Gene_BnaA01g22210D|intergenic_region|Gene_BnaA01g22200D-Gene_BnaA01g22210D|||n.14570862A>G||||||
chrA01	14570926	chrA01-14570926	A	C	ANN=C|upstream_gene_variant|MODIFIER|Gene_BnaA01g22200D|Gene_BnaA01g22200D|transcript|BnaA01g22200D|Coding||c.-811T>G|||||811|,C|intergenic_region|MODIFIER|Gene_BnaA01g22200D-Gene_BnaA01g22210D|Gene_BnaA01g22200D-Gene_BnaA01g22210D|intergenic_region|Gene_BnaA01g22200D-Gene_BnaA01g22210D|||n.14570926A>C||||||
chrA01	14570965	chrA01-14570965	A	G	ANN=G|upstream_gene_variant|MODIFIER|Gene_BnaA01g22200D|Gene_BnaA01g22200D|transcript|BnaA01g22200D|Coding||c.-850T>C|||||850|,G|intergenic_region|MODIFIER|Gene_BnaA01g22200D-Gene_BnaA01g22210D|Gene_BnaA01g22200D-Gene_BnaA01g22210D|intergenic_region|Gene_BnaA01g22200D-Gene_BnaA01g22210D|||n.14570965A>G||||||
chrA01	14570977	chrA01-14570977	G	A	ANN=A|upstream_gene_variant|MODIFIER|Gene_BnaA01g22200D|Gene_BnaA01g22200D|transcript|BnaA01g22200D|Coding||c.-862C>T|||||862|,A|intergenic_region|MODIFIER|Gene_BnaA01g22200D-Gene_BnaA01g22210D|Gene_BnaA01g22200D-Gene_BnaA01g22210D|intergenic_region|Gene_BnaA01g22200D-Gene_BnaA01g22210D|||n.14570977G>A||||||
chrA02	11694294	chrA02-11694294	A	T	ANN=T|missense_variant|MODERATE|Gene_BnaA02g18920D|Gene_BnaA02g18920D|transcript|BnaA02g18920D|Coding|15/15|c.2183T>A|p.Leu728His|2183/2325|2183/2325|728/774||,T|downstream_gene_variant|MODIFIER|Gene_BnaA02g18930D|Gene_BnaA02g18930D|transcript|BnaA02g18930D|Coding||c.*3932T>A|||||3932|
chrA02	11694485	chrA02-11694485	G	T	ANN=T|synonymous_variant|LOW|Gene_BnaA02g18920D|Gene_BnaA02g18920D|transcript|BnaA02g18920D|Coding|15/15|c.1992C>A|p.Pro664Pro|1992/2325|1992/2325|664/774||,T|downstream_gene_variant|MODIFIER|Gene_BnaA02g18930D|Gene_BnaA02g18930D|transcript|BnaA02g18930D|Coding||c.*3741C>A|||||3741|
chrA02	11694752	chrA02-11694752	C	T	ANN=T|synonymous_variant|LOW|Gene_BnaA02g18920D|Gene_BnaA02g18920D|transcript|BnaA02g18920D|Coding|15/15|c.1725G>A|p.Arg575Arg|1725/2325|1725/2325|575/774||,T|downstream_gene_variant|MODIFIER|Gene_BnaA02g18930D|Gene_BnaA02g18930D|transcript|BnaA02g18930D|Coding||c.*3474G>A|||||3474|
chrA02	11694969	chrA02-11694969	G	A	ANN=A|downstream_gene_variant|MODIFIER|Gene_BnaA02g18930D|Gene_BnaA02g18930D|transcript|BnaA02g18930D|Coding||c.*3257C>T|||||3257|,A|intron_variant|MODIFIER|Gene_BnaA02g18920D|Gene_BnaA02g18920D|transcript|BnaA02g18920D|Coding|14/14|c.1709-201C>T||||||
chrA02	11695465	chrA02-11695465	T	C	ANN=C|missense_variant|MODERATE|Gene_BnaA02g18920D|Gene_BnaA02g18920D|transcript|BnaA02g18920D|Coding|13/15|c.1511A>G|p.Tyr504Cys|1511/2325|1511/2325|504/774||,C|downstream_gene_variant|MODIFIER|Gene_BnaA02g18930D|Gene_BnaA02g18930D|transcript|BnaA02g18930D|Coding||c.*2761A>G|||||2761|
chrA02	11695549	chrA02-11695549	T	G	ANN=G|downstream_gene_variant|MODIFIER|Gene_BnaA02g18930D|Gene_BnaA02g18930D|transcript|BnaA02g18930D|Coding||c.*2677A>C|||||2677|,G|intron_variant|MODIFIER|Gene_BnaA02g18920D|Gene_BnaA02g18920D|transcript|BnaA02g18920D|Coding|12/14|c.1497+11A>C||||||
chrA02	11695680	chrA02-11695680	T	C	ANN=C|synonymous_variant|LOW|Gene_BnaA02g18920D|Gene_BnaA02g18920D|transcript|BnaA02g18920D|Coding|12/15|c.1377A>G|p.Gln459Gln|1377/2325|1377/2325|459/774||,C|downstream_gene_variant|MODIFIER|Gene_BnaA02g18930D|Gene_BnaA02g18930D|transcript|BnaA02g18930D|Coding||c.*2546A>G|||||2546|
chrA02	11696006	chrA02-11696006	C	A	ANN=A|downstream_gene_variant|MODIFIER|Gene_BnaA02g18930D|Gene_BnaA02g18930D|transcript|BnaA02g18930D|Coding||c.*2220G>T|||||2220|,A|intron_variant|MODIFIER|Gene_BnaA02g18920D|Gene_BnaA02g18920D|transcript|BnaA02g18920D|Coding|10/14|c.1202+27G>T||||||
chrA02	11696291	chrA02-11696291	G	C	ANN=C|downstream_gene_variant|MODIFIER|Gene_BnaA02g18930D|Gene_BnaA02g18930D|transcript|BnaA02g18930D|Coding||c.*1935C>G|||||1935|,C|intron_variant|MODIFIER|Gene_BnaA02g18920D|Gene_BnaA02g18920D|transcript|BnaA02g18920D|Coding|9/14|c.1014+10C>G||||||
chrA02	11696456	chrA02-11696456	G	A	ANN=A|downstream_gene_variant|MODIFIER|Gene_BnaA02g18930D|Gene_BnaA02g18930D|transcript|BnaA02g18930D|Coding||c.*1770C>T|||||1770|,A|intron_variant|MODIFIER|Gene_BnaA02g18920D|Gene_BnaA02g18920D|transcript|BnaA02g18920D|Coding|8/14|c.913+31C>T||||||
chrA02	11697552	chrA02-11697552	C	A	ANN=A|downstream_gene_variant|MODIFIER|Gene_BnaA02g18930D|Gene_BnaA02g18930D|transcript|BnaA02g18930D|Coding||c.*674G>T|||||674|,A|intron_variant|MODIFIER|Gene_BnaA02g18920D|Gene_BnaA02g18920D|transcript|BnaA02g18920D|Coding|2/14|c.465-13G>T||||||
chrA02	11697701	chrA02-11697701	T	C	ANN=C|missense_variant|MODERATE|Gene_BnaA02g18920D|Gene_BnaA02g18920D|transcript|BnaA02g18920D|Coding|2/15|c.377A>G|p.His126Arg|377/2325|377/2325|126/774||,C|downstream_gene_variant|MODIFIER|Gene_BnaA02g18930D|Gene_BnaA02g18930D|transcript|BnaA02g18930D|Coding||c.*525A>G|||||525|
chrA02	11697746	chrA02-11697746	C	T	ANN=T|missense_variant|MODERATE|Gene_BnaA02g18920D|Gene_BnaA02g18920D|transcript|BnaA02g18920D|Coding|2/15|c.332G>A|p.Cys111Tyr|332/2325|332/2325|111/774||,T|downstream_gene_variant|MODIFIER|Gene_BnaA02g18930D|Gene_BnaA02g18930D|transcript|BnaA02g18930D|Coding||c.*480G>A|||||480|
chrA02	11697833	chrA02-11697833	T	A	ANN=A|missense_variant|MODERATE|Gene_BnaA02g18920D|Gene_BnaA02g18920D|transcript|BnaA02g18920D|Coding|2/15|c.245A>T|p.Gln82Leu|245/2325|245/2325|82/774||,A|downstream_gene_variant|MODIFIER|Gene_BnaA02g18930D|Gene_BnaA02g18930D|transcript|BnaA02g18930D|Coding||c.*393A>T|||||393|
chrA02	11697834	chrA02-11697834	G	A	ANN=A|stop_gained|HIGH|Gene_BnaA02g18920D|Gene_BnaA02g18920D|transcript|BnaA02g18920D|Coding|2/15|c.244C>T|p.Gln82*|244/2325|244/2325|82/774||,A|downstream_gene_variant|MODIFIER|Gene_BnaA02g18930D|Gene_BnaA02g18930D|transcript|BnaA02g18930D|Coding||c.*392C>T|||||392|;LOF=(Gene_BnaA02g18920D|Gene_BnaA02g18920D|1|1.00);NMD=(Gene_BnaA02g18920D|Gene_BnaA02g18920D|1|1.00)
chrA02	11698022	chrA02-11698022	A	G	ANN=G|downstream_gene_variant|MODIFIER|Gene_BnaA02g18930D|Gene_BnaA02g18930D|transcript|BnaA02g18930D|Coding||c.*204T>C|||||204|,G|intron_variant|MODIFIER|Gene_BnaA02g18920D|Gene_BnaA02g18920D|transcript|BnaA02g18920D|Coding|1/14|c.76-20T>C||||||
chrA02	11698100	chrA02-11698100	C	T	ANN=T|missense_variant|MODERATE|Gene_BnaA02g18920D|Gene_BnaA02g18920D|transcript|BnaA02g18920D|Coding|1/15|c.61G>A|p.Ala21Thr|61/2325|61/2325|21/774||,T|downstream_gene_variant|MODIFIER|Gene_BnaA02g18930D|Gene_BnaA02g18930D|transcript|BnaA02g18930D|Coding||c.*126G>A|||||126|
chrA02	8465665	chrA02-8465665	C	A	ANN=A|intron_variant|MODIFIER|Gene_BnaA02g14790D|Gene_BnaA02g14790D|transcript|BnaA02g14790D|Coding|2/2|c.2125-36G>T||||||
chrA02	8465667	chrA02-8465667	G	T	ANN=T|intron_variant|MODIFIER|Gene_BnaA02g14790D|Gene_BnaA02g14790D|transcript|BnaA02g14790D|Coding|2/2|c.2124+35C>A||||||
chrA02	8465699	chrA02-8465699	C	T	ANN=T|splice_region_variant&intron_variant|LOW|Gene_BnaA02g14790D|Gene_BnaA02g14790D|transcript|BnaA02g14790D|Coding|2/2|c.2124+3G>A||||||
chrA02	8465733	chrA02-8465733	C	T	ANN=T|missense_variant|MODERATE|Gene_BnaA02g14790D|Gene_BnaA02g14790D|transcript|BnaA02g14790D|Coding|2/3|c.2093G>A|p.Arg698Lys|2093/2445|2093/2445|698/814||
chrA02	8465810	chrA02-8465810	G	A	ANN=A|synonymous_variant|LOW|Gene_BnaA02g14790D|Gene_BnaA02g14790D|transcript|BnaA02g14790D|Coding|2/3|c.2016C>T|p.Asp672Asp|2016/2445|2016/2445|672/814||
chrA02	8465819	chrA02-8465819	C	A	ANN=A|synonymous_variant|LOW|Gene_BnaA02g14790D|Gene_BnaA02g14790D|transcript|BnaA02g14790D|Coding|2/3|c.2007G>T|p.Ala669Ala|2007/2445|2007/2445|669/814||
chrA02	8465957	chrA02-8465957	T	C	ANN=C|synonymous_variant|LOW|Gene_BnaA02g14790D|Gene_BnaA02g14790D|transcript|BnaA02g14790D|Coding|2/3|c.1869A>G|p.Glu623Glu|1869/2445|1869/2445|623/814||
chrA02	8466009	chrA02-8466009	T	A	ANN=A|intron_variant|MODIFIER|Gene_BnaA02g14790D|Gene_BnaA02g14790D|transcript|BnaA02g14790D|Coding|1/2|c.1851-34A>T||||||
chrA02	8466042	chrA02-8466042	A	T	ANN=T|intron_variant|MODIFIER|Gene_BnaA02g14790D|Gene_BnaA02g14790D|transcript|BnaA02g14790D|Coding|1/2|c.1851-67T>A||||||
chrA02	8466080	chrA02-8466080	T	A	ANN=A|intron_variant|MODIFIER|Gene_BnaA02g14790D|Gene_BnaA02g14790D|transcript|BnaA02g14790D|Coding|1/2|c.1851-105A>T||||||
chrA02	8466081	chrA02-8466081	T	A	ANN=A|intron_variant|MODIFIER|Gene_BnaA02g14790D|Gene_BnaA02g14790D|transcript|BnaA02g14790D|Coding|1/2|c.1851-106A>T||||||
chrA02	8466111	chrA02-8466111	G	A	ANN=A|intron_variant|MODIFIER|Gene_BnaA02g14790D|Gene_BnaA02g14790D|transcript|BnaA02g14790D|Coding|1/2|c.1850+85C>T||||||
chrA02	8466128	chrA02-8466128	C	A	ANN=A|intron_variant|MODIFIER|Gene_BnaA02g14790D|Gene_BnaA02g14790D|transcript|BnaA02g14790D|Coding|1/2|c.1850+68G>T||||||
chrA02	8466161	chrA02-8466161	A	T	ANN=T|intron_variant|MODIFIER|Gene_BnaA02g14790D|Gene_BnaA02g14790D|transcript|BnaA02g14790D|Coding|1/2|c.1850+35T>A||||||
chrA02	8466255	chrA02-8466255	G	A	ANN=A|synonymous_variant|LOW|Gene_BnaA02g14790D|Gene_BnaA02g14790D|transcript|BnaA02g14790D|Coding|1/3|c.1791C>T|p.Ser597Ser|1791/2445|1791/2445|597/814||
chrA02	8466304	chrA02-8466304	T	G	ANN=G|missense_variant|MODERATE|Gene_BnaA02g14790D|Gene_BnaA02g14790D|transcript|BnaA02g14790D|Coding|1/3|c.1742A>C|p.Asp581Ala|1742/2445|1742/2445|581/814||
chrA02	8466378	chrA02-8466378	C	A	ANN=A|synonymous_variant|LOW|Gene_BnaA02g14790D|Gene_BnaA02g14790D|transcript|BnaA02g14790D|Coding|1/3|c.1668G>T|p.Leu556Leu|1668/2445|1668/2445|556/814||
chrA02	8466384	chrA02-8466384	C	G	ANN=G|synonymous_variant|LOW|Gene_BnaA02g14790D|Gene_BnaA02g14790D|transcript|BnaA02g14790D|Coding|1/3|c.1662G>C|p.Gly554Gly|1662/2445|1662/2445|554/814||
chrA02	8466423	chrA02-8466423	C	T	ANN=T|synonymous_variant|LOW|Gene_BnaA02g14790D|Gene_BnaA02g14790D|transcript|BnaA02g14790D|Coding|1/3|c.1623G>A|p.Arg541Arg|1623/2445|1623/2445|541/814||
chrA02	8466564	chrA02-8466564	A	G	ANN=G|synonymous_variant|LOW|Gene_BnaA02g14790D|Gene_BnaA02g14790D|transcript|BnaA02g14790D|Coding|1/3|c.1482T>C|p.Phe494Phe|1482/2445|1482/2445|494/814||
chrA02	8466579	chrA02-8466579	A	G	ANN=G|synonymous_variant|LOW|Gene_BnaA02g14790D|Gene_BnaA02g14790D|transcript|BnaA02g14790D|Coding|1/3|c.1467T>C|p.Tyr489Tyr|1467/2445|1467/2445|489/814||
chrA02	8466651	chrA02-8466651	C	T	ANN=T|synonymous_variant|LOW|Gene_BnaA02g14790D|Gene_BnaA02g14790D|transcript|BnaA02g14790D|Coding|1/3|c.1395G>A|p.Lys465Lys|1395/2445|1395/2445|465/814||
chrA02	8466678	chrA02-8466678	T	A	ANN=A|synonymous_variant|LOW|Gene_BnaA02g14790D|Gene_BnaA02g14790D|transcript|BnaA02g14790D|Coding|1/3|c.1368A>T|p.Val456Val|1368/2445|1368/2445|456/814||
chrA02	8466681	chrA02-8466681	A	G	ANN=G|synonymous_variant|LOW|Gene_BnaA02g14790D|Gene_BnaA02g14790D|transcript|BnaA02g14790D|Coding|1/3|c.1365T>C|p.Asp455Asp|1365/2445|1365/2445|455/814||
chrA02	8466750	chrA02-8466750	C	G	ANN=G|synonymous_variant|LOW|Gene_BnaA02g14790D|Gene_BnaA02g14790D|transcript|BnaA02g14790D|Coding|1/3|c.1296G>C|p.Val432Val|1296/2445|1296/2445|432/814||
chrA02	8466759	chrA02-8466759	G	A	ANN=A|synonymous_variant|LOW|Gene_BnaA02g14790D|Gene_BnaA02g14790D|transcript|BnaA02g14790D|Coding|1/3|c.1287C>T|p.Thr429Thr|1287/2445|1287/2445|429/814||
chrA02	8466765	chrA02-8466765	T	C	ANN=C|synonymous_variant|LOW|Gene_BnaA02g14790D|Gene_BnaA02g14790D|transcript|BnaA02g14790D|Coding|1/3|c.1281A>G|p.Thr427Thr|1281/2445|1281/2445|427/814||
chrA02	8466785	chrA02-8466785	T	C	ANN=C|missense_variant|MODERATE|Gene_BnaA02g14790D|Gene_BnaA02g14790D|transcript|BnaA02g14790D|Coding|1/3|c.1261A>G|p.Asn421Asp|1261/2445|1261/2445|421/814||
chrA02	8466864	chrA02-8466864	G	A	ANN=A|synonymous_variant|LOW|Gene_BnaA02g14790D|Gene_BnaA02g14790D|transcript|BnaA02g14790D|Coding|1/3|c.1182C>T|p.Cys394Cys|1182/2445|1182/2445|394/814||
chrA02	8466999	chrA02-8466999	A	G	ANN=G|synonymous_variant|LOW|Gene_BnaA02g14790D|Gene_BnaA02g14790D|transcript|BnaA02g14790D|Coding|1/3|c.1047T>C|p.Ala349Ala|1047/2445|1047/2445|349/814||
chrA02	8467077	chrA02-8467077	A	G	ANN=G|synonymous_variant|LOW|Gene_BnaA02g14790D|Gene_BnaA02g14790D|transcript|BnaA02g14790D|Coding|1/3|c.969T>C|p.Tyr323Tyr|969/2445|969/2445|323/814||
chrA02	8467106	chrA02-8467106	G	A	ANN=A|synonymous_variant|LOW|Gene_BnaA02g14790D|Gene_BnaA02g14790D|transcript|BnaA02g14790D|Coding|1/3|c.940C>T|p.Leu314Leu|940/2445|940/2445|314/814||
chrA02	8467155	chrA02-8467155	G	A	ANN=A|synonymous_variant|LOW|Gene_BnaA02g14790D|Gene_BnaA02g14790D|transcript|BnaA02g14790D|Coding|1/3|c.891C>T|p.Val297Val|891/2445|891/2445|297/814||
chrA02	8467158	chrA02-8467158	T	C	ANN=C|synonymous_variant|LOW|Gene_BnaA02g14790D|Gene_BnaA02g14790D|transcript|BnaA02g14790D|Coding|1/3|c.888A>G|p.Leu296Leu|888/2445|888/2445|296/814||
chrA02	8467179	chrA02-8467179	T	C	ANN=C|synonymous_variant|LOW|Gene_BnaA02g14790D|Gene_BnaA02g14790D|transcript|BnaA02g14790D|Coding|1/3|c.867A>G|p.Glu289Glu|867/2445|867/2445|289/814||
chrA02	8467200	chrA02-8467200	G	C	ANN=C|synonymous_variant|LOW|Gene_BnaA02g14790D|Gene_BnaA02g14790D|transcript|BnaA02g14790D|Coding|1/3|c.846C>G|p.Ala282Ala|846/2445|846/2445|282/814||
chrA02	8467221	chrA02-8467221	G	C	ANN=C|synonymous_variant|LOW|Gene_BnaA02g14790D|Gene_BnaA02g14790D|transcript|BnaA02g14790D|Coding|1/3|c.825C>G|p.Leu275Leu|825/2445|825/2445|275/814||
chrA02	8467278	chrA02-8467278	A	G	ANN=G|synonymous_variant|LOW|Gene_BnaA02g14790D|Gene_BnaA02g14790D|transcript|BnaA02g14790D|Coding|1/3|c.768T>C|p.Thr256Thr|768/2445|768/2445|256/814||
chrA02	8467347	chrA02-8467347	G	A	ANN=A|synonymous_variant|LOW|Gene_BnaA02g14790D|Gene_BnaA02g14790D|transcript|BnaA02g14790D|Coding|1/3|c.699C>T|p.Cys233Cys|699/2445|699/2445|233/814||
chrA02	8467392	chrA02-8467392	A	G	ANN=G|synonymous_variant|LOW|Gene_BnaA02g14790D|Gene_BnaA02g14790D|transcript|BnaA02g14790D|Coding|1/3|c.654T>C|p.Ile218Ile|654/2445|654/2445|218/814||
chrA02	8467479	chrA02-8467479	G	A	ANN=A|synonymous_variant|LOW|Gene_BnaA02g14790D|Gene_BnaA02g14790D|transcript|BnaA02g14790D|Coding|1/3|c.567C>T|p.Leu189Leu|567/2445|567/2445|189/814||
chrA02	8467575	chrA02-8467575	G	C	ANN=C|synonymous_variant|LOW|Gene_BnaA02g14790D|Gene_BnaA02g14790D|transcript|BnaA02g14790D|Coding|1/3|c.471C>G|p.Pro157Pro|471/2445|471/2445|157/814||
chrA02	8467620	chrA02-8467620	G	T	ANN=T|synonymous_variant|LOW|Gene_BnaA02g14790D|Gene_BnaA02g14790D|transcript|BnaA02g14790D|Coding|1/3|c.426C>A|p.Ser142Ser|426/2445|426/2445|142/814||
chrA02	8467866	chrA02-8467866	C	T	ANN=T|synonymous_variant|LOW|Gene_BnaA02g14790D|Gene_BnaA02g14790D|transcript|BnaA02g14790D|Coding|1/3|c.180G>A|p.Pro60Pro|180/2445|180/2445|60/814||
chrA02	8467941	chrA02-8467941	G	A	ANN=A|synonymous_variant|LOW|Gene_BnaA02g14790D|Gene_BnaA02g14790D|transcript|BnaA02g14790D|Coding|1/3|c.105C>T|p.Asp35Asp|105/2445|105/2445|35/814||
chrA02	8468029	chrA02-8468029	A	G	ANN=G|missense_variant|MODERATE|Gene_BnaA02g14790D|Gene_BnaA02g14790D|transcript|BnaA02g14790D|Coding|1/3|c.17T>C|p.Ile6Thr|17/2445|17/2445|6/814||
chrA02	8468031	chrA02-8468031	T	C	ANN=C|synonymous_variant|LOW|Gene_BnaA02g14790D|Gene_BnaA02g14790D|transcript|BnaA02g14790D|Coding|1/3|c.15A>G|p.Gly5Gly|15/2445|15/2445|5/814||
chrA02	8468083	chrA02-8468083	A	G	ANN=G|upstream_gene_variant|MODIFIER|Gene_BnaA02g14790D|Gene_BnaA02g14790D|transcript|BnaA02g14790D|Coding||c.-38T>C|||||38|,G|intergenic_region|MODIFIER|Gene_BnaA02g14790D-Gene_BnaA02g14800D|Gene_BnaA02g14790D-Gene_BnaA02g14800D|intergenic_region|Gene_BnaA02g14790D-Gene_BnaA02g14800D|||n.8468083A>G||||||
chrA02	8468267	chrA02-8468267	A	T	ANN=T|upstream_gene_variant|MODIFIER|Gene_BnaA02g14790D|Gene_BnaA02g14790D|transcript|BnaA02g14790D|Coding||c.-222T>A|||||222|,T|intergenic_region|MODIFIER|Gene_BnaA02g14790D-Gene_BnaA02g14800D|Gene_BnaA02g14790D-Gene_BnaA02g14800D|intergenic_region|Gene_BnaA02g14790D-Gene_BnaA02g14800D|||n.8468267A>T||||||
chrA02	8468280	chrA02-8468280	C	A	ANN=A|upstream_gene_variant|MODIFIER|Gene_BnaA02g14790D|Gene_BnaA02g14790D|transcript|BnaA02g14790D|Coding||c.-235G>T|||||235|,A|intergenic_region|MODIFIER|Gene_BnaA02g14790D-Gene_BnaA02g14800D|Gene_BnaA02g14790D-Gene_BnaA02g14800D|intergenic_region|Gene_BnaA02g14790D-Gene_BnaA02g14800D|||n.8468280C>A||||||
chrA02	8468291	chrA02-8468291	A	G	ANN=G|upstream_gene_variant|MODIFIER|Gene_BnaA02g14790D|Gene_BnaA02g14790D|transcript|BnaA02g14790D|Coding||c.-246T>C|||||246|,G|intergenic_region|MODIFIER|Gene_BnaA02g14790D-Gene_BnaA02g14800D|Gene_BnaA02g14790D-Gene_BnaA02g14800D|intergenic_region|Gene_BnaA02g14790D-Gene_BnaA02g14800D|||n.8468291A>G||||||
chrA02	8468354	chrA02-8468354	A	G	ANN=G|upstream_gene_variant|MODIFIER|Gene_BnaA02g14790D|Gene_BnaA02g14790D|transcript|BnaA02g14790D|Coding||c.-309T>C|||||309|,G|intergenic_region|MODIFIER|Gene_BnaA02g14790D-Gene_BnaA02g14800D|Gene_BnaA02g14790D-Gene_BnaA02g14800D|intergenic_region|Gene_BnaA02g14790D-Gene_BnaA02g14800D|||n.8468354A>G||||||
chrA02	8468356	chrA02-8468356	C	G	ANN=G|upstream_gene_variant|MODIFIER|Gene_BnaA02g14790D|Gene_BnaA02g14790D|transcript|BnaA02g14790D|Coding||c.-311G>C|||||311|,G|intergenic_region|MODIFIER|Gene_BnaA02g14790D-Gene_BnaA02g14800D|Gene_BnaA02g14790D-Gene_BnaA02g14800D|intergenic_region|Gene_BnaA02g14790D-Gene_BnaA02g14800D|||n.8468356C>G||||||
chrA02	8468374	chrA02-8468374	A	G	ANN=G|upstream_gene_variant|MODIFIER|Gene_BnaA02g14790D|Gene_BnaA02g14790D|transcript|BnaA02g14790D|Coding||c.-329T>C|||||329|,G|intergenic_region|MODIFIER|Gene_BnaA02g14790D-Gene_BnaA02g14800D|Gene_BnaA02g14790D-Gene_BnaA02g14800D|intergenic_region|Gene_BnaA02g14790D-Gene_BnaA02g14800D|||n.8468374A>G||||||
chrA02	8468409	chrA02-8468409	T	C	ANN=C|upstream_gene_variant|MODIFIER|Gene_BnaA02g14790D|Gene_BnaA02g14790D|transcript|BnaA02g14790D|Coding||c.-364A>G|||||364|,C|intergenic_region|MODIFIER|Gene_BnaA02g14790D-Gene_BnaA02g14800D|Gene_BnaA02g14790D-Gene_BnaA02g14800D|intergenic_region|Gene_BnaA02g14790D-Gene_BnaA02g14800D|||n.8468409T>C||||||
chrA02	8468449	chrA02-8468449	G	C	ANN=C|upstream_gene_variant|MODIFIER|Gene_BnaA02g14790D|Gene_BnaA02g14790D|transcript|BnaA02g14790D|Coding||c.-404C>G|||||404|,C|intergenic_region|MODIFIER|Gene_BnaA02g14790D-Gene_BnaA02g14800D|Gene_BnaA02g14790D-Gene_BnaA02g14800D|intergenic_region|Gene_BnaA02g14790D-Gene_BnaA02g14800D|||n.8468449G>C||||||
chrA02	8468524	chrA02-8468524	G	A	ANN=A|upstream_gene_variant|MODIFIER|Gene_BnaA02g14790D|Gene_BnaA02g14790D|transcript|BnaA02g14790D|Coding||c.-479C>T|||||479|,A|intergenic_region|MODIFIER|Gene_BnaA02g14790D-Gene_BnaA02g14800D|Gene_BnaA02g14790D-Gene_BnaA02g14800D|intergenic_region|Gene_BnaA02g14790D-Gene_BnaA02g14800D|||n.8468524G>A||||||
chrA02	8468525	chrA02-8468525	C	A	ANN=A|upstream_gene_variant|MODIFIER|Gene_BnaA02g14790D|Gene_BnaA02g14790D|transcript|BnaA02g14790D|Coding||c.-480G>T|||||480|,A|intergenic_region|MODIFIER|Gene_BnaA02g14790D-Gene_BnaA02g14800D|Gene_BnaA02g14790D-Gene_BnaA02g14800D|intergenic_region|Gene_BnaA02g14790D-Gene_BnaA02g14800D|||n.8468525C>A||||||
chrA02	8468674	chrA02-8468674	G	A	ANN=A|upstream_gene_variant|MODIFIER|Gene_BnaA02g14790D|Gene_BnaA02g14790D|transcript|BnaA02g14790D|Coding||c.-629C>T|||||629|,A|intergenic_region|MODIFIER|Gene_BnaA02g14790D-Gene_BnaA02g14800D|Gene_BnaA02g14790D-Gene_BnaA02g14800D|intergenic_region|Gene_BnaA02g14790D-Gene_BnaA02g14800D|||n.8468674G>A||||||
chrA02	8468735	chrA02-8468735	A	T	ANN=T|upstream_gene_variant|MODIFIER|Gene_BnaA02g14790D|Gene_BnaA02g14790D|transcript|BnaA02g14790D|Coding||c.-690T>A|||||690|,T|intergenic_region|MODIFIER|Gene_BnaA02g14790D-Gene_BnaA02g14800D|Gene_BnaA02g14790D-Gene_BnaA02g14800D|intergenic_region|Gene_BnaA02g14790D-Gene_BnaA02g14800D|||n.8468735A>T||||||
chrA02	8468743	chrA02-8468743	C	A	ANN=A|upstream_gene_variant|MODIFIER|Gene_BnaA02g14790D|Gene_BnaA02g14790D|transcript|BnaA02g14790D|Coding||c.-698G>T|||||698|,A|intergenic_region|MODIFIER|Gene_BnaA02g14790D-Gene_BnaA02g14800D|Gene_BnaA02g14790D-Gene_BnaA02g14800D|intergenic_region|Gene_BnaA02g14790D-Gene_BnaA02g14800D|||n.8468743C>A||||||
chrA02	8468783	chrA02-8468783	A	G	ANN=G|upstream_gene_variant|MODIFIER|Gene_BnaA02g14790D|Gene_BnaA02g14790D|transcript|BnaA02g14790D|Coding||c.-738T>C|||||738|,G|intergenic_region|MODIFIER|Gene_BnaA02g14790D-Gene_BnaA02g14800D|Gene_BnaA02g14790D-Gene_BnaA02g14800D|intergenic_region|Gene_BnaA02g14790D-Gene_BnaA02g14800D|||n.8468783A>G||||||
chrA03	21754714	chrA03-21754714	C	G	ANN=G|synonymous_variant|LOW|Gene_BnaA03g43320D|Gene_BnaA03g43320D|transcript|BnaA03g43320D|Coding|1/3|c.171C>G|p.Val57Val|171/2574|171/2574|57/857||,G|downstream_gene_variant|MODIFIER|Gene_BnaA03g43330D|Gene_BnaA03g43330D|transcript|BnaA03g43330D|Coding||c.*2938G>C|||||2938|
chrA03	21754717	chrA03-21754717	C	G	ANN=G|synonymous_variant|LOW|Gene_BnaA03g43320D|Gene_BnaA03g43320D|transcript|BnaA03g43320D|Coding|1/3|c.174C>G|p.Ala58Ala|174/2574|174/2574|58/857||,G|downstream_gene_variant|MODIFIER|Gene_BnaA03g43330D|Gene_BnaA03g43330D|transcript|BnaA03g43330D|Coding||c.*2935G>C|||||2935|
chrA03	21755092	chrA03-21755092	C	T	ANN=T|synonymous_variant|LOW|Gene_BnaA03g43320D|Gene_BnaA03g43320D|transcript|BnaA03g43320D|Coding|1/3|c.549C>T|p.Val183Val|549/2574|549/2574|183/857||,T|downstream_gene_variant|MODIFIER|Gene_BnaA03g43330D|Gene_BnaA03g43330D|transcript|BnaA03g43330D|Coding||c.*2560G>A|||||2560|
chrA03	21755155	chrA03-21755155	T	A	ANN=A|synonymous_variant|LOW|Gene_BnaA03g43320D|Gene_BnaA03g43320D|transcript|BnaA03g43320D|Coding|1/3|c.612T>A|p.Val204Val|612/2574|612/2574|204/857||,A|downstream_gene_variant|MODIFIER|Gene_BnaA03g43330D|Gene_BnaA03g43330D|transcript|BnaA03g43330D|Coding||c.*2497A>T|||||2497|
chrA03	21755192	chrA03-21755192	C	A	ANN=A|synonymous_variant|LOW|Gene_BnaA03g43320D|Gene_BnaA03g43320D|transcript|BnaA03g43320D|Coding|1/3|c.649C>A|p.Arg217Arg|649/2574|649/2574|217/857||,A|downstream_gene_variant|MODIFIER|Gene_BnaA03g43330D|Gene_BnaA03g43330D|transcript|BnaA03g43330D|Coding||c.*2460G>T|||||2460|
chrA03	21755341	chrA03-21755341	T	G	ANN=G|synonymous_variant|LOW|Gene_BnaA03g43320D|Gene_BnaA03g43320D|transcript|BnaA03g43320D|Coding|1/3|c.798T>G|p.Ala266Ala|798/2574|798/2574|266/857||,G|downstream_gene_variant|MODIFIER|Gene_BnaA03g43330D|Gene_BnaA03g43330D|transcript|BnaA03g43330D|Coding||c.*2311A>C|||||2311|
chrA03	21755344	chrA03-21755344	A	G	ANN=G|synonymous_variant|LOW|Gene_BnaA03g43320D|Gene_BnaA03g43320D|transcript|BnaA03g43320D|Coding|1/3|c.801A>G|p.Arg267Arg|801/2574|801/2574|267/857||,G|downstream_gene_variant|MODIFIER|Gene_BnaA03g43330D|Gene_BnaA03g43330D|transcript|BnaA03g43330D|Coding||c.*2308T>C|||||2308|
chrA03	21755503	chrA03-21755503	T	G	ANN=G|synonymous_variant|LOW|Gene_BnaA03g43320D|Gene_BnaA03g43320D|transcript|BnaA03g43320D|Coding|1/3|c.960T>G|p.Thr320Thr|960/2574|960/2574|320/857||,G|downstream_gene_variant|MODIFIER|Gene_BnaA03g43330D|Gene_BnaA03g43330D|transcript|BnaA03g43330D|Coding||c.*2149A>C|||||2149|
chrA03	21755653	chrA03-21755653	G	T	ANN=T|synonymous_variant|LOW|Gene_BnaA03g43320D|Gene_BnaA03g43320D|transcript|BnaA03g43320D|Coding|1/3|c.1110G>T|p.Val370Val|1110/2574|1110/2574|370/857||,T|downstream_gene_variant|MODIFIER|Gene_BnaA03g43330D|Gene_BnaA03g43330D|transcript|BnaA03g43330D|Coding||c.*1999C>A|||||1999|
chrA03	21755656	chrA03-21755656	A	C	ANN=C|synonymous_variant|LOW|Gene_BnaA03g43320D|Gene_BnaA03g43320D|transcript|BnaA03g43320D|Coding|1/3|c.1113A>C|p.Val371Val|1113/2574|1113/2574|371/857||,C|downstream_gene_variant|MODIFIER|Gene_BnaA03g43330D|Gene_BnaA03g43330D|transcript|BnaA03g43330D|Coding||c.*1996T>G|||||1996|
chrA03	21755878	chrA03-21755878	C	T	ANN=T|synonymous_variant|LOW|Gene_BnaA03g43320D|Gene_BnaA03g43320D|transcript|BnaA03g43320D|Coding|1/3|c.1335C>T|p.Leu445Leu|1335/2574|1335/2574|445/857||,T|downstream_gene_variant|MODIFIER|Gene_BnaA03g43330D|Gene_BnaA03g43330D|transcript|BnaA03g43330D|Coding||c.*1774G>A|||||1774|
chrA03	21755980	chrA03-21755980	C	T	ANN=T|synonymous_variant|LOW|Gene_BnaA03g43320D|Gene_BnaA03g43320D|transcript|BnaA03g43320D|Coding|1/3|c.1437C>T|p.Ser479Ser|1437/2574|1437/2574|479/857||,T|downstream_gene_variant|MODIFIER|Gene_BnaA03g43330D|Gene_BnaA03g43330D|transcript|BnaA03g43330D|Coding||c.*1672G>A|||||1672|
chrA03	21756067	chrA03-21756067	T	C	ANN=C|synonymous_variant|LOW|Gene_BnaA03g43320D|Gene_BnaA03g43320D|transcript|BnaA03g43320D|Coding|1/3|c.1524T>C|p.Tyr508Tyr|1524/2574|1524/2574|508/857||,C|downstream_gene_variant|MODIFIER|Gene_BnaA03g43330D|Gene_BnaA03g43330D|transcript|BnaA03g43330D|Coding||c.*1585A>G|||||1585|
chrA03	21756082	chrA03-21756082	A	G	ANN=G|synonymous_variant|LOW|Gene_BnaA03g43320D|Gene_BnaA03g43320D|transcript|BnaA03g43320D|Coding|1/3|c.1539A>G|p.Ser513Ser|1539/2574|1539/2574|513/857||,G|downstream_gene_variant|MODIFIER|Gene_BnaA03g43330D|Gene_BnaA03g43330D|transcript|BnaA03g43330D|Coding||c.*1570T>C|||||1570|
chrA03	21756933	chrA03-21756933	A	G	ANN=G|synonymous_variant|LOW|Gene_BnaA03g43320D|Gene_BnaA03g43320D|transcript|BnaA03g43320D|Coding|2/3|c.2100A>G|p.Thr700Thr|2100/2574|2100/2574|700/857||,G|downstream_gene_variant|MODIFIER|Gene_BnaA03g43330D|Gene_BnaA03g43330D|transcript|BnaA03g43330D|Coding||c.*719T>C|||||719|
chrA03	21756954	chrA03-21756954	G	T	ANN=T|synonymous_variant|LOW|Gene_BnaA03g43320D|Gene_BnaA03g43320D|transcript|BnaA03g43320D|Coding|2/3|c.2121G>T|p.Ala707Ala|2121/2574|2121/2574|707/857||,T|downstream_gene_variant|MODIFIER|Gene_BnaA03g43330D|Gene_BnaA03g43330D|transcript|BnaA03g43330D|Coding||c.*698C>A|||||698|
chrA03	21756955	chrA03-21756955	T	C	ANN=C|synonymous_variant|LOW|Gene_BnaA03g43320D|Gene_BnaA03g43320D|transcript|BnaA03g43320D|Coding|2/3|c.2122T>C|p.Leu708Leu|2122/2574|2122/2574|708/857||,C|downstream_gene_variant|MODIFIER|Gene_BnaA03g43330D|Gene_BnaA03g43330D|transcript|BnaA03g43330D|Coding||c.*697A>G|||||697|
chrA03	21756966	chrA03-21756966	C	T	ANN=T|synonymous_variant|LOW|Gene_BnaA03g43320D|Gene_BnaA03g43320D|transcript|BnaA03g43320D|Coding|2/3|c.2133C>T|p.Asn711Asn|2133/2574|2133/2574|711/857||,T|downstream_gene_variant|MODIFIER|Gene_BnaA03g43330D|Gene_BnaA03g43330D|transcript|BnaA03g43330D|Coding||c.*686G>A|||||686|
chrA03	21757024	chrA03-21757024	T	C	ANN=C|synonymous_variant|LOW|Gene_BnaA03g43320D|Gene_BnaA03g43320D|transcript|BnaA03g43320D|Coding|2/3|c.2191T>C|p.Leu731Leu|2191/2574|2191/2574|731/857||,C|downstream_gene_variant|MODIFIER|Gene_BnaA03g43330D|Gene_BnaA03g43330D|transcript|BnaA03g43330D|Coding||c.*628A>G|||||628|
chrA03	21757065	chrA03-21757065	C	A	ANN=A|synonymous_variant|LOW|Gene_BnaA03g43320D|Gene_BnaA03g43320D|transcript|BnaA03g43320D|Coding|2/3|c.2232C>A|p.Thr744Thr|2232/2574|2232/2574|744/857||,A|downstream_gene_variant|MODIFIER|Gene_BnaA03g43330D|Gene_BnaA03g43330D|transcript|BnaA03g43330D|Coding||c.*587G>T|||||587|
chrA03	21757074	chrA03-21757074	A	G	ANN=G|synonymous_variant|LOW|Gene_BnaA03g43320D|Gene_BnaA03g43320D|transcript|BnaA03g43320D|Coding|2/3|c.2241A>G|p.Gln747Gln|2241/2574|2241/2574|747/857||,G|downstream_gene_variant|MODIFIER|Gene_BnaA03g43330D|Gene_BnaA03g43330D|transcript|BnaA03g43330D|Coding||c.*578T>C|||||578|
chrA03	21757098	chrA03-21757098	A	C	ANN=C|splice_region_variant&intron_variant|LOW|Gene_BnaA03g43320D|Gene_BnaA03g43320D|transcript|BnaA03g43320D|Coding|2/2|c.2262+3A>C||||||,C|downstream_gene_variant|MODIFIER|Gene_BnaA03g43330D|Gene_BnaA03g43330D|transcript|BnaA03g43330D|Coding||c.*554T>G|||||554|
chrA03	21757127	chrA03-21757127	C	T	ANN=T|downstream_gene_variant|MODIFIER|Gene_BnaA03g43330D|Gene_BnaA03g43330D|transcript|BnaA03g43330D|Coding||c.*525G>A|||||525|,T|intron_variant|MODIFIER|Gene_BnaA03g43320D|Gene_BnaA03g43320D|transcript|BnaA03g43320D|Coding|2/2|c.2262+32C>T||||||
chrA03	21757135	chrA03-21757135	C	T	ANN=T|downstream_gene_variant|MODIFIER|Gene_BnaA03g43330D|Gene_BnaA03g43330D|transcript|BnaA03g43330D|Coding||c.*517G>A|||||517|,T|intron_variant|MODIFIER|Gene_BnaA03g43320D|Gene_BnaA03g43320D|transcript|BnaA03g43320D|Coding|2/2|c.2262+40C>T||||||
chrA03	21757138	chrA03-21757138	A	G	ANN=G|downstream_gene_variant|MODIFIER|Gene_BnaA03g43330D|Gene_BnaA03g43330D|transcript|BnaA03g43330D|Coding||c.*514T>C|||||514|,G|intron_variant|MODIFIER|Gene_BnaA03g43320D|Gene_BnaA03g43320D|transcript|BnaA03g43320D|Coding|2/2|c.2262+43A>G||||||
chrA03	21757153	chrA03-21757153	G	T	ANN=T|downstream_gene_variant|MODIFIER|Gene_BnaA03g43330D|Gene_BnaA03g43330D|transcript|BnaA03g43330D|Coding||c.*499C>A|||||499|,T|intron_variant|MODIFIER|Gene_BnaA03g43320D|Gene_BnaA03g43320D|transcript|BnaA03g43320D|Coding|2/2|c.2263-28G>T||||||
chrA03	21757228	chrA03-21757228	G	A	ANN=A|synonymous_variant|LOW|Gene_BnaA03g43320D|Gene_BnaA03g43320D|transcript|BnaA03g43320D|Coding|3/3|c.2310G>A|p.Gln770Gln|2310/2574|2310/2574|770/857||,A|downstream_gene_variant|MODIFIER|Gene_BnaA03g43330D|Gene_BnaA03g43330D|transcript|BnaA03g43330D|Coding||c.*424C>T|||||424|
chrA03	21757335	chrA03-21757335	C	A	ANN=A|missense_variant|MODERATE|Gene_BnaA03g43320D|Gene_BnaA03g43320D|transcript|BnaA03g43320D|Coding|3/3|c.2417C>A|p.Pro806Gln|2417/2574|2417/2574|806/857||,A|downstream_gene_variant|MODIFIER|Gene_BnaA03g43330D|Gene_BnaA03g43330D|transcript|BnaA03g43330D|Coding||c.*317G>T|||||317|
chrA03	24949107	chrA03-24949107	G	T	ANN=T|downstream_gene_variant|MODIFIER|Gene_BnaA03g48660D|Gene_BnaA03g48660D|transcript|BnaA03g48660D|Coding||c.*4235C>A|||||4235|,T|intron_variant|MODIFIER|Gene_BnaA03g48650D|Gene_BnaA03g48650D|transcript|BnaA03g48650D|Coding|1/16|c.119-33G>T||||||
chrA03	24949373	chrA03-24949373	T	C	ANN=C|downstream_gene_variant|MODIFIER|Gene_BnaA03g48660D|Gene_BnaA03g48660D|transcript|BnaA03g48660D|Coding||c.*3969A>G|||||3969|,C|intron_variant|MODIFIER|Gene_BnaA03g48650D|Gene_BnaA03g48650D|transcript|BnaA03g48650D|Coding|2/16|c.217-16T>C||||||
chrA03	24949484	chrA03-24949484	C	A	ANN=A|synonymous_variant|LOW|Gene_BnaA03g48650D|Gene_BnaA03g48650D|transcript|BnaA03g48650D|Coding|3/17|c.312C>A|p.Thr104Thr|312/2361|312/2361|104/786||,A|downstream_gene_variant|MODIFIER|Gene_BnaA03g48660D|Gene_BnaA03g48660D|transcript|BnaA03g48660D|Coding||c.*3858G>T|||||3858|
chrA03	24949925	chrA03-24949925	G	C	ANN=C|missense_variant|MODERATE|Gene_BnaA03g48650D|Gene_BnaA03g48650D|transcript|BnaA03g48650D|Coding|4/17|c.650G>C|p.Cys217Ser|650/2361|650/2361|217/786||,C|downstream_gene_variant|MODIFIER|Gene_BnaA03g48660D|Gene_BnaA03g48660D|transcript|BnaA03g48660D|Coding||c.*3417C>G|||||3417|
chrA03	24949981	chrA03-24949981	T	C	ANN=C|missense_variant|MODERATE|Gene_BnaA03g48650D|Gene_BnaA03g48650D|transcript|BnaA03g48650D|Coding|4/17|c.706T>C|p.Ser236Pro|706/2361|706/2361|236/786||,C|downstream_gene_variant|MODIFIER|Gene_BnaA03g48660D|Gene_BnaA03g48660D|transcript|BnaA03g48660D|Coding||c.*3361A>G|||||3361|
chrA03	24950196	chrA03-24950196	A	C	ANN=C|synonymous_variant|LOW|Gene_BnaA03g48650D|Gene_BnaA03g48650D|transcript|BnaA03g48650D|Coding|5/17|c.813A>C|p.Gly271Gly|813/2361|813/2361|271/786||,C|downstream_gene_variant|MODIFIER|Gene_BnaA03g48660D|Gene_BnaA03g48660D|transcript|BnaA03g48660D|Coding||c.*3146T>G|||||3146|
chrA03	24950489	chrA03-24950489	T	C	ANN=C|downstream_gene_variant|MODIFIER|Gene_BnaA03g48660D|Gene_BnaA03g48660D|transcript|BnaA03g48660D|Coding||c.*2853A>G|||||2853|,C|intron_variant|MODIFIER|Gene_BnaA03g48650D|Gene_BnaA03g48650D|transcript|BnaA03g48650D|Coding|6/16|c.971-27T>C||||||
chrA03	24950498	chrA03-24950498	G	C	ANN=C|downstream_gene_variant|MODIFIER|Gene_BnaA03g48660D|Gene_BnaA03g48660D|transcript|BnaA03g48660D|Coding||c.*2844C>G|||||2844|,C|intron_variant|MODIFIER|Gene_BnaA03g48650D|Gene_BnaA03g48650D|transcript|BnaA03g48650D|Coding|6/16|c.971-18G>C||||||
chrA03	24950610	chrA03-24950610	C	T	ANN=T|splice_region_variant&intron_variant|LOW|Gene_BnaA03g48650D|Gene_BnaA03g48650D|transcript|BnaA03g48650D|Coding|7/16|c.1059+6C>T||||||,T|downstream_gene_variant|MODIFIER|Gene_BnaA03g48660D|Gene_BnaA03g48660D|transcript|BnaA03g48660D|Coding||c.*2732G>A|||||2732|
chrA03	24950656	chrA03-24950656	C	A	ANN=A|downstream_gene_variant|MODIFIER|Gene_BnaA03g48660D|Gene_BnaA03g48660D|transcript|BnaA03g48660D|Coding||c.*2686G>T|||||2686|,A|intron_variant|MODIFIER|Gene_BnaA03g48650D|Gene_BnaA03g48650D|transcript|BnaA03g48650D|Coding|7/16|c.1060-29C>A||||||
chrA03	24950696	chrA03-24950696	T	C	ANN=C|synonymous_variant|LOW|Gene_BnaA03g48650D|Gene_BnaA03g48650D|transcript|BnaA03g48650D|Coding|8/17|c.1071T>C|p.Ile357Ile|1071/2361|1071/2361|357/786||,C|downstream_gene_variant|MODIFIER|Gene_BnaA03g48660D|Gene_BnaA03g48660D|transcript|BnaA03g48660D|Coding||c.*2646A>G|||||2646|
chrA03	24951303	chrA03-24951303	C	A	ANN=A|downstream_gene_variant|MODIFIER|Gene_BnaA03g48660D|Gene_BnaA03g48660D|transcript|BnaA03g48660D|Coding||c.*2039G>T|||||2039|,A|intron_variant|MODIFIER|Gene_BnaA03g48650D|Gene_BnaA03g48650D|transcript|BnaA03g48650D|Coding|10/16|c.1397+34C>A||||||
chrA03	24951489	chrA03-24951489	G	A	ANN=A|splice_region_variant&intron_variant|LOW|Gene_BnaA03g48650D|Gene_BnaA03g48650D|transcript|BnaA03g48650D|Coding|11/16|c.1515+7G>A||||||,A|downstream_gene_variant|MODIFIER|Gene_BnaA03g48660D|Gene_BnaA03g48660D|transcript|BnaA03g48660D|Coding||c.*1853C>T|||||1853|
chrA03	24951682	chrA03-24951682	C	A	ANN=A|synonymous_variant|LOW|Gene_BnaA03g48650D|Gene_BnaA03g48650D|transcript|BnaA03g48650D|Coding|12/17|c.1632C>A|p.Pro544Pro|1632/2361|1632/2361|544/786||,A|upstream_gene_variant|MODIFIER|Gene_BnaA03g48670D|Gene_BnaA03g48670D|transcript|BnaA03g48670D|Coding||c.-4816C>A|||||4816|,A|downstream_gene_variant|MODIFIER|Gene_BnaA03g48660D|Gene_BnaA03g48660D|transcript|BnaA03g48660D|Coding||c.*1660G>T|…
chrA03	24951757	chrA03-24951757	A	T	ANN=T|upstream_gene_variant|MODIFIER|Gene_BnaA03g48670D|Gene_BnaA03g48670D|transcript|BnaA03g48670D|Coding||c.-4741A>T|||||4741|,T|downstream_gene_variant|MODIFIER|Gene_BnaA03g48660D|Gene_BnaA03g48660D|transcript|BnaA03g48660D|Coding||c.*1585T>A|||||1585|,T|intron_variant|MODIFIER|Gene_BnaA03g48650D|Gene_BnaA03g48650D|transcript|BnaA03g48650D|Coding|12/16|c.1683+24A>T||||||
chrA03	24951766	chrA03-24951766	T	C	ANN=C|upstream_gene_variant|MODIFIER|Gene_BnaA03g48670D|Gene_BnaA03g48670D|transcript|BnaA03g48670D|Coding||c.-4732T>C|||||4732|,C|downstream_gene_variant|MODIFIER|Gene_BnaA03g48660D|Gene_BnaA03g48660D|transcript|BnaA03g48660D|Coding||c.*1576A>G|||||1576|,C|intron_variant|MODIFIER|Gene_BnaA03g48650D|Gene_BnaA03g48650D|transcript|BnaA03g48650D|Coding|12/16|c.1683+33T>C||||||
chrA03	24951975	chrA03-24951975	T	C	ANN=C|upstream_gene_variant|MODIFIER|Gene_BnaA03g48670D|Gene_BnaA03g48670D|transcript|BnaA03g48670D|Coding||c.-4523T>C|||||4523|,C|downstream_gene_variant|MODIFIER|Gene_BnaA03g48660D|Gene_BnaA03g48660D|transcript|BnaA03g48660D|Coding||c.*1367A>G|||||1367|,C|intron_variant|MODIFIER|Gene_BnaA03g48650D|Gene_BnaA03g48650D|transcript|BnaA03g48650D|Coding|13/16|c.1806+41T>C||||||
chrA03	24952114	chrA03-24952114	A	T	ANN=T|splice_region_variant&intron_variant|LOW|Gene_BnaA03g48650D|Gene_BnaA03g48650D|transcript|BnaA03g48650D|Coding|14/16|c.1894+6A>T||||||,T|upstream_gene_variant|MODIFIER|Gene_BnaA03g48670D|Gene_BnaA03g48670D|transcript|BnaA03g48670D|Coding||c.-4384A>T|||||4384|,T|downstream_gene_variant|MODIFIER|Gene_BnaA03g48660D|Gene_BnaA03g48660D|transcript|BnaA03g48660D|Coding||c.*1228T>A|||||1228|
chrA03	24952152	chrA03-24952152	C	A	ANN=A|upstream_gene_variant|MODIFIER|Gene_BnaA03g48670D|Gene_BnaA03g48670D|transcript|BnaA03g48670D|Coding||c.-4346C>A|||||4346|,A|downstream_gene_variant|MODIFIER|Gene_BnaA03g48660D|Gene_BnaA03g48660D|transcript|BnaA03g48660D|Coding||c.*1190G>T|||||1190|,A|intron_variant|MODIFIER|Gene_BnaA03g48650D|Gene_BnaA03g48650D|transcript|BnaA03g48650D|Coding|14/16|c.1894+44C>A||||||
chrA03	24952168	chrA03-24952168	G	A	ANN=A|upstream_gene_variant|MODIFIER|Gene_BnaA03g48670D|Gene_BnaA03g48670D|transcript|BnaA03g48670D|Coding||c.-4330G>A|||||4330|,A|downstream_gene_variant|MODIFIER|Gene_BnaA03g48660D|Gene_BnaA03g48660D|transcript|BnaA03g48660D|Coding||c.*1174C>T|||||1174|,A|intron_variant|MODIFIER|Gene_BnaA03g48650D|Gene_BnaA03g48650D|transcript|BnaA03g48650D|Coding|14/16|c.1894+60G>A||||||
chrA03	24952171	chrA03-24952171	A	G	ANN=G|upstream_gene_variant|MODIFIER|Gene_BnaA03g48670D|Gene_BnaA03g48670D|transcript|BnaA03g48670D|Coding||c.-4327A>G|||||4327|,G|downstream_gene_variant|MODIFIER|Gene_BnaA03g48660D|Gene_BnaA03g48660D|transcript|BnaA03g48660D|Coding||c.*1171T>C|||||1171|,G|intron_variant|MODIFIER|Gene_BnaA03g48650D|Gene_BnaA03g48650D|transcript|BnaA03g48650D|Coding|14/16|c.1894+63A>G||||||
chrA03	24952179	chrA03-24952179	T	C	ANN=C|upstream_gene_variant|MODIFIER|Gene_BnaA03g48670D|Gene_BnaA03g48670D|transcript|BnaA03g48670D|Coding||c.-4319T>C|||||4319|,C|downstream_gene_variant|MODIFIER|Gene_BnaA03g48660D|Gene_BnaA03g48660D|transcript|BnaA03g48660D|Coding||c.*1163A>G|||||1163|,C|intron_variant|MODIFIER|Gene_BnaA03g48650D|Gene_BnaA03g48650D|transcript|BnaA03g48650D|Coding|14/16|c.1894+71T>C||||||
chrA03	24952181	chrA03-24952181	G	A	ANN=A|upstream_gene_variant|MODIFIER|Gene_BnaA03g48670D|Gene_BnaA03g48670D|transcript|BnaA03g48670D|Coding||c.-4317G>A|||||4317|,A|downstream_gene_variant|MODIFIER|Gene_BnaA03g48660D|Gene_BnaA03g48660D|transcript|BnaA03g48660D|Coding||c.*1161C>T|||||1161|,A|intron_variant|MODIFIER|Gene_BnaA03g48650D|Gene_BnaA03g48650D|transcript|BnaA03g48650D|Coding|14/16|c.1894+73G>A||||||
chrA03	24952223	chrA03-24952223	A	C	ANN=C|upstream_gene_variant|MODIFIER|Gene_BnaA03g48670D|Gene_BnaA03g48670D|transcript|BnaA03g48670D|Coding||c.-4275A>C|||||4275|,C|downstream_gene_variant|MODIFIER|Gene_BnaA03g48660D|Gene_BnaA03g48660D|transcript|BnaA03g48660D|Coding||c.*1119T>G|||||1119|,C|intron_variant|MODIFIER|Gene_BnaA03g48650D|Gene_BnaA03g48650D|transcript|BnaA03g48650D|Coding|14/16|c.1894+115A>C||||||
chrA03	24952257	chrA03-24952257	A	G	ANN=G|upstream_gene_variant|MODIFIER|Gene_BnaA03g48670D|Gene_BnaA03g48670D|transcript|BnaA03g48670D|Coding||c.-4241A>G|||||4241|,G|downstream_gene_variant|MODIFIER|Gene_BnaA03g48660D|Gene_BnaA03g48660D|transcript|BnaA03g48660D|Coding||c.*1085T>C|||||1085|,G|intron_variant|MODIFIER|Gene_BnaA03g48650D|Gene_BnaA03g48650D|transcript|BnaA03g48650D|Coding|14/16|c.1895-116A>G||||||
chrA03	24952261	chrA03-24952261	T	A	ANN=A|upstream_gene_variant|MODIFIER|Gene_BnaA03g48670D|Gene_BnaA03g48670D|transcript|BnaA03g48670D|Coding||c.-4237T>A|||||4237|,A|downstream_gene_variant|MODIFIER|Gene_BnaA03g48660D|Gene_BnaA03g48660D|transcript|BnaA03g48660D|Coding||c.*1081A>T|||||1081|,A|intron_variant|MODIFIER|Gene_BnaA03g48650D|Gene_BnaA03g48650D|transcript|BnaA03g48650D|Coding|14/16|c.1895-112T>A||||||
chrA03	24952279	chrA03-24952279	A	G	ANN=G|upstream_gene_variant|MODIFIER|Gene_BnaA03g48670D|Gene_BnaA03g48670D|transcript|BnaA03g48670D|Coding||c.-4219A>G|||||4219|,G|downstream_gene_variant|MODIFIER|Gene_BnaA03g48660D|Gene_BnaA03g48660D|transcript|BnaA03g48660D|Coding||c.*1063T>C|||||1063|,G|intron_variant|MODIFIER|Gene_BnaA03g48650D|Gene_BnaA03g48650D|transcript|BnaA03g48650D|Coding|14/16|c.1895-94A>G||||||
chrA03	24952292	chrA03-24952292	T	A	ANN=A|upstream_gene_variant|MODIFIER|Gene_BnaA03g48670D|Gene_BnaA03g48670D|transcript|BnaA03g48670D|Coding||c.-4206T>A|||||4206|,A|downstream_gene_variant|MODIFIER|Gene_BnaA03g48660D|Gene_BnaA03g48660D|transcript|BnaA03g48660D|Coding||c.*1050A>T|||||1050|,A|intron_variant|MODIFIER|Gene_BnaA03g48650D|Gene_BnaA03g48650D|transcript|BnaA03g48650D|Coding|14/16|c.1895-81T>A||||||
chrA03	24952330	chrA03-24952330	A	G	ANN=G|upstream_gene_variant|MODIFIER|Gene_BnaA03g48670D|Gene_BnaA03g48670D|transcript|BnaA03g48670D|Coding||c.-4168A>G|||||4168|,G|downstream_gene_variant|MODIFIER|Gene_BnaA03g48660D|Gene_BnaA03g48660D|transcript|BnaA03g48660D|Coding||c.*1012T>C|||||1012|,G|intron_variant|MODIFIER|Gene_BnaA03g48650D|Gene_BnaA03g48650D|transcript|BnaA03g48650D|Coding|14/16|c.1895-43A>G||||||
chrA03	24952333	chrA03-24952333	G	A	ANN=A|upstream_gene_variant|MODIFIER|Gene_BnaA03g48670D|Gene_BnaA03g48670D|transcript|BnaA03g48670D|Coding||c.-4165G>A|||||4165|,A|downstream_gene_variant|MODIFIER|Gene_BnaA03g48660D|Gene_BnaA03g48660D|transcript|BnaA03g48660D|Coding||c.*1009C>T|||||1009|,A|intron_variant|MODIFIER|Gene_BnaA03g48650D|Gene_BnaA03g48650D|transcript|BnaA03g48650D|Coding|14/16|c.1895-40G>A||||||
chrA03	24952345	chrA03-24952345	G	C	ANN=C|upstream_gene_variant|MODIFIER|Gene_BnaA03g48670D|Gene_BnaA03g48670D|transcript|BnaA03g48670D|Coding||c.-4153G>C|||||4153|,C|downstream_gene_variant|MODIFIER|Gene_BnaA03g48660D|Gene_BnaA03g48660D|transcript|BnaA03g48660D|Coding||c.*997C>G|||||997|,C|intron_variant|MODIFIER|Gene_BnaA03g48650D|Gene_BnaA03g48650D|transcript|BnaA03g48650D|Coding|14/16|c.1895-28G>C||||||
chrA03	24952352	chrA03-24952352	T	G	ANN=G|upstream_gene_variant|MODIFIER|Gene_BnaA03g48670D|Gene_BnaA03g48670D|transcript|BnaA03g48670D|Coding||c.-4146T>G|||||4146|,G|downstream_gene_variant|MODIFIER|Gene_BnaA03g48660D|Gene_BnaA03g48660D|transcript|BnaA03g48660D|Coding||c.*990A>C|||||990|,G|intron_variant|MODIFIER|Gene_BnaA03g48650D|Gene_BnaA03g48650D|transcript|BnaA03g48650D|Coding|14/16|c.1895-21T>G||||||
chrA03	24952367	chrA03-24952367	T	G	ANN=G|splice_region_variant&intron_variant|LOW|Gene_BnaA03g48650D|Gene_BnaA03g48650D|transcript|BnaA03g48650D|Coding|14/16|c.1895-6T>G||||||,G|upstream_gene_variant|MODIFIER|Gene_BnaA03g48670D|Gene_BnaA03g48670D|transcript|BnaA03g48670D|Coding||c.-4131T>G|||||4131|,G|downstream_gene_variant|MODIFIER|Gene_BnaA03g48660D|Gene_BnaA03g48660D|transcript|BnaA03g48660D|Coding||c.*975A>C|||||975|
[truncated: 477 more rows]
